# Supplementary material for: Analysis of the Phlebiopsis gigantea Genome, Transcriptome and Secretome Provides Insight into Its Pioneer Colonization Strategies of Wood
Source: PLoS Genet. 2014 Dec 4;10(12):e1004759. doi: 10.1371/journal.pgen.1004759 (PMC4256170; doi:10.1371/journal.pgen.1004759)
Supplement: Dataset S1 — Number and distribution of genes used for PCA. (XLSX) [file pgen.1004759.s058.xlsx]

## Sheet: lignocellulose.txt
Dataset S1. Numbers of genes for previously published Agaricomycete genomes
Annotation	Pospl	Fompi	Wolco	Glotr	Conpu	Dacsp	Dicsq	Trave	Fomme	Aurde	Punst	Hetan	Stehi	Gansp	Bjead	Phlbr	Phaca	Cersu	Phach	Phlgi
GH1	2	2	1	5	3	1	4	2	5	1	1	2	3	3	2	2	2	3	2	2
GH2	3	4	3	4	5	3	4	5	2	7	4	3	3	3	3	2	2	4	2	3
GH3	6	12	8	11	13	9	8	13	8	14	14	12	17	13	9	8	11	6	11	9
GH5	17	19	18	19	21	24	19	22	20	43	18	16	20	18	19	23	24	18	19	19
GH6	0	0	0	0	2	0	1	1	2	2	1	1	1	1	1	1	1	1	1	1
GH7	0	0	0	0	2	0	4	4	2	8	5	1	3	3	5	4	6	3	6	5
GH9	0	0	0	1	1	1	0	1	1	0	1	1	1	1	1	1	1	0	1	1
GH10	3	2	4	3	3	3	5	6	4	4	5	2	6	10	4	8	5	6	6	4
GH11	0	0	0	0	0	0	0	0	0	3	1	0	1	0	0	0	1	1	1	2
GH12	2	2	2	2	4	1	3	5	3	1	2	4	5	3	2	2	3	2	2	3
GH13	7	7	11	9	6	11	10	7	6	10	10	8	14	8	10	8	10	7	9	9
GH15	2	4	2	2	2	2	2	4	1	2	4	5	3	3	2	4	2	3	2	2
GH16	24	28	19	29	24	14	35	31	28	44	26	23	26	36	21	30	24	24	23	23
GH17	2	3	2	2	4	3	2	3	4	7	2	2	4	3	3	2	2	3	2	2
GH18	11	19	11	11	28	7	21	20	17	36	14	10	21	38	16	22	11	14	11	12
GH20	3	4	2	4	4	3	4	6	6	4	6	4	4	5	4	6	3	3	3	4
GH23	1	1	1	1	1	2	1	1	1	2	1	1	1	1	1	1	1	1	0	1
GH25	0	0	0	2	2	0	2	1	1	1	1	0	0	2	1	1	0	1	1	1
GH26	0	0	0	0	0	1	0	0	0	0	0	0	0	0	0	0	0	0	0	0
GH27	3	4	3	3	4	2	6	4	4	5	5	4	5	3	3	2	3	4	3	3
GH28	8	12	9	10	13	6	7	11	17	14	13	8	17	10	6	5	4	6	4	10
GH29	0	0	0	1	4	2	0	0	0	3	1	2	4	0	0	1	0	0	0	0
GH30	3	10	2	3	7	4	2	4	2	1	3	2	5	3	1	2	3	1	2	2
GH31	4	5	5	5	13	6	6	5	5	11	8	10	8	7	4	5	8	5	6	6
GH32	0	3	0	1	2	1	2	3	0	2	1	1	1	1	0	0	0	0	0	0
GH35	1	2	2	2	2	1	3	2	2	6	4	4	7	7	4	4	4	1	3	2
GH36	0	0	0	0	0	1	0	0	0	0	0	0	0	0	0	0	0	0	0	0
GH37	3	2	4	2	4	2	3	2	3	3	2	2	2	2	3	3	2	2	2	2
GH38	1	1	1	1	1	1	1	1	1	2	1	1	1	1	1	1	3	1	1	1
GH43	1	7	1	6	6	5	7	3	7	28	7	4	12	12	6	2	4	2	4	7
GH44	0	0	0	0	0	0	1	0	0	1	1	0	1	0	0	2	0	0	0	0
GH45	0	1	0	1	1	1	1	2	0	2	1	2	1	2	1	3	1	2	2	1
GH47	5	5	5	4	9	4	5	5	5	12	5	6	6	6	6	9	5	4	6	6
GH51	1	4	4	4	3	2	2	2	1	3	3	1	3	2	2	1	2	2	2	2
GH52	0	0	0	0	0	0	0	0	0	1	0	0	0	0	0	0	0	0	0	0
GH53	1	1	1	2	1	1	1	1	1	1	2	1	2	1	1	1	1	6	1	1
GH54	0	0	0	0	0	0	0	0	0	0	2	0	0	0	0	0	0	0	0	0
GH55	3	3	3	2	5	2	2	2	1	5	3	1	2	3	3	4	2	2	2	2
GH63	1	1	1	1	1	1	1	1	1	1	1	1	1	1	1	1	1	1	1	1
GH71	2	4	1	6	6	5	4	5	2	12	5	3	8	6	3	4	2	1	3	4
GH72	2	1	2	1	1	1	1	1	1	1	1	1	2	1	1	1	1	1	1	1
GH74	0	0	0	1	0	0	1	1	4	1	2	1	2	1	2	1	2	1	4	2
GH75	0	0	0	0	0	0	0	0	0	3	0	0	1	0	0	0	0	0	0	0
GH76	0	0	0	4	3	0	1	0	0	1	3	1	4	2	0	0	0	0	0	0
GH78	3	3	3	2	2	0	5	3	2	4	7	2	3	4	2	1	1	1	1	1
GH79	2	3	3	6	4	7	13	11	7	13	9	9	12	12	9	11	11	8	5	7
GH81	0	0	0	1	1	0	0	0	0	5	0	2	2	0	0	0	0	0	0	0
GH85	1	1	1	1	1	2	1	1	1	1	1	1	1	1	1	3	1	1	1	1
GH88	1	1	1	1	1	1	1	1	2	2	1	1	1	1	1	1	1	1	1	1
GH89	1	2	1	0	2	0	1	1	0	1	0	0	0	2	1	3	1	2	2	2
GH92	3	5	3	4	4	1	5	4	4	7	4	4	6	5	3	4	4	3	4	4
GH93	0	0	0	0	1	0	1	0	0	1	1	0	1	2	0	0	0	0	0	0
GH94	0	0	0	0	0	0	0	0	0	1	0	0	0	0	0	0	0	0	0	0
GH95	1	1	1	1	1	0	1	1	2	1	1	1	1	2	1	3	1	1	1	0
GH105	1	3	0	2	0	0	1	1	1	3	2	2	2	1	1	0	0	0	0	0
GH114	0	0	0	0	1	0	0	0	0	4	0	0	0	0	0	0	0	0	0	0
GH115	1	1	2	2	2	2	2	2	3	2	1	1	2	3	2	2	1	2	1	1
GH125	1	1	1	1	1	0	1	1	1	1	1	1	1	1	1	1	1	1	1	1
CE1	0	1	1	3	1	1	1	4	1	5	3	1	2	2	1	1	3	3	5	2
CE3	0	0	0	0	0	0	0	0	0	3	0	0	0	0	0	0	0	0	0	0
CE4	5	3	4	5	9	11	3	3	4	11	5	5	7	4	3	2	3	3	3	3
CE5	0	0	0	0	1	0	0	0	0	3	1	0	1	0	0	1	0	0	0	0
CE8	3	2	1	2	2	3	3	2	3	2	6	3	5	3	2	3	2	2	2	3
CE9	2	7	1	1	1	0	1	1	1	1	1	2	1	1	1	1	1	1	1	1
CE12	0	0	0	0	0	0	2	0	2	2	1	2	3	1	1	0	0	0	0	1
CE15	1	1	1	1	0	1	2	2	1	6	2	1	1	2	2	2	3	2	2	1
CE16	6	8	6	7	7	3	13	8	6	12	12	5	14	16	15	8	5	5	2	6
PL1	0	0	0	0	0	0	0	0	2	2	4	2	4	0	1	0	0	0	0	0
PL3	0	0	0	0	0	0	0	0	0	1	0	0	0	0	2	0	0	0	0	0
PL4	0	0	0	2	0	0	1	1	0	1	3	1	3	0	1	1	0	0	0	0
PL7	0	0	0	0	0	0	0	0	0	1	0	0	0	0	0	0	0	0	0	0
PL8	0	0	0	1	0	0	3	2	0	2	1	2	2	3	1	1	1	2	1	1
PL14	8	3	2	6	3	3	7	6	4	13	4	4	5	6	5	5	7	4	3	5
Lip	0	0	0	0	0	0	0	10	0	0	0	0	0	0	12	5	4	0	10	3
MnP	0	0	0	0	0	0	9	13	16	5	10	8	5	6	6	10	7	13	5	7
VP	0	0	0	0	0	0	3	2	0	0	0	0	0	2	1	0	0	2	0	0
HtP	5	4	5	6	2	6	4	3	4	16	8	5	10	3	4	2	3	9	3	4
DyP	2	0	0	0	0	0	1	2	3	11	5	1	2	3	10	2	0	0	0	4
Lac	2	5	3	3	6	0	11	7	10	7	12	16	15	16	0	8	0	7	0	0
GLX	0	0	0	0	0	0	5	5	0	2	3	0	3	5	1	1	1	0	1	1
OtherCRO	3	4	4	2	6	3	4	4	4	7	6	4	5	4	6	7	5	4	6	5
Cytb562	0	0	0	0	3	0	1	1	0	0	0	1	1	1	1	1	1	1	1	1
CDH	0	0	0	1	2	0	1	1	1	1	1	1	1	1	1	1	2	1	1	1
POX	0	0	0	0	0	0	0	2	0	2	0	0	0	0	1	1	0	0	1	1
LPMO	2	4	2	4	10	0	15	18	13	20	14	10	16	16	28	12	11	9	13	15

## Sheet: lipid
EC Number	Description	Pospl	Fompi	Wolco	Glotr	Conpu	Dacsp	Treme	Dicsp	Trave	Fomme	Aur	Punst	Hetan	Stehi	Gansp	Bjead	Phlbr	Phaca	Cersu	Phach	Phlgi
1.1.1.1	alcohol dehydrogenase	10	15	25	22	17	16	7	16	22	12	16	8	17	28	12	13	21	10	17	19	14
1.1.1.35	3-hydroxyacyl-CoA dehydrogenase (HAD)	0	*1	0	1	*1	*1	1	3	1	2	*1	2	1	1	1	2	1	*2	2	*2	1
1.14.14.1	unspecific monooxygenase	25	69	69	42	110	38	1	77	90	55	96	52	71	115	72	80	92	91	108	78	56
1.14.15.3	alkane 1-monooxygenase	0	6	3	2	2	2	0	0	6	0	3	1	0	2	1	4	1	3	3	2	4
1.2.1.3	aldehyde dehydrogenase (NAD+)	0	9	5	6	11	3	5	8	6	6	4	8	5	13	6	10	12	16	10	11	10
1.3.3.6	acyl-CoA oxidase (AO)	0	2	3	1	2	0	0	1	5	1	3	0	1	2	1	1	1	3	4	1	2
1.3.99.-	acyl-CoA dehydrogenase (ADH)	1	2	1	2	1	2	1	3	2	1	1	2	1	2	2	2	2	1	2	2	2
1.3.99.3	acyl-CoA dehydrogenase (ADH)	0	2	4	2	2	2	2	2	2	1	4	3	3	1	2	2	3	4	2	2	2
1.3.99.7	glutaryl-CoA dehydrogenase (G-ADH)	2	1	1	2	1	1	1	1	1	2	1	1	1	1	1	1	1	1	1	1	1
2.3.1.16	acetyl-CoA C-acyltransferase (Ketothiolase, KT)	1	4	4	3	4	4	2	4	4	4	4	3	3	4	4	4	6	4	4	5	5
2.3.1.21	carnitine O-palmitoyltransferase	0	1	0	0	1	0	0	0	1	0	0	0	1	0	0	1	0	0	0	0	0
2.3.1.9	acetyl-CoA C-acetyltransferase	0	1	1	1	1	1	1	1	1	1	1	2	1	1	1	1	2	1	1	1	1
4.2.1.17	enoyl-CoA hydratase (EH)	3	5	9	7	6	4	2	6	6	8	7	5	6	5	6	6	6	7	5	6	6
5.3.3.8	dodecenoyl-CoA isomerase	0	1	2	0	1	0	0	1	1	1	0	2	1	1	1	0	0	0	1	1	1
6.2.1.3	long-chain-fatty-acid---CoA ligase	2	5	5	8	7	6	3	8	7	5	10	5	9	9	6	9	9	13	5	6	9
* manually anotated
