# Supplementary material for: Analysis of the Phlebiopsis gigantea Genome, Transcriptome and Secretome Provides Insight into Its Pioneer Colonization Strategies of Wood
Source: PLoS Genet. 2014 Dec 4;10(12):e1004759. doi: 10.1371/journal.pgen.1004759 (PMC4256170; doi:10.1371/journal.pgen.1004759)
Supplement: Dataset S2 — Complete listing of P. gigantea protein models and expression data. (XLSX) [file pgen.1004759.s059.xlsx]

## Sheet: Sheet1
Dataset S2. Listing of all expressed Phlebiopsis gigantea genes together with their location and recognizable domains.
Transcript ID1	PROTEIN id1	Putative function2	Important features (SS, CBM1,TMHs)3	Comment	scaffold4	strand4	start4	end4	unique peptides NELP Day 55	NELP Day 5 Scaffold 4 emPAI5	unique peptides NELP day 75	NELP Day 7 Saffold 4 emPAI5	unique peptides NELP Day 95	NELP Day9 Scaffold 4 emPAI5	unique peptides ELP day 55	ELP Day 5 Scaffold 4 emPAI5	unique peptides ELP day 75	ELP Day 7 Scaffold emPAI5	unique peptides ELP day 95	ELP Day 9 Scaffold 4 emPAI5	NELP - linear RPKM6	ELP - linear RPKM6	Glucose - linear RPKM6	NELP/Glc P value7	NELP/Glc7	NELP/ELP P value7	NELP/ELP7	ELP/Glc P value7	ELP/Glc7	GO term Id8	Go Name8	iprId8	iprDesc8	domainDb8	domainId8	domainDesc8	numHits8	domainStarts8	domainEnds8	score8	ecNum8	definition8	catalyticActivity8	cofactors8	pathway8	pathway_class8	pathway_type8	emPAI Avicel with acetone extractive9	emPAI Avicel w/o acetone extractive9
24377	24205	Znf1			scaffold_66	-	79988	83468													28.003	22.151	15.801	0.141	1.77223	0.135	1.26419	0.342	1.40187	2196	transcription factor activity	IPR014778	Myb, DNA-binding	HMMPfam	PF00249	Myb_DNA-binding	1	380,	425,	0.00059
124009	123837	Zn finger domain protein			scaffold_1	-	271785	273482													8222.76	1745.42	435.854	0.00689	18.8659	0.00232	4.71104	0.0573	4.0046	2175	nucleic acid binding	IPR007087	Zinc finger, C2H2-type	HMMPfam	PF00096	zf-C2H2	3	48,76,107,	70,101,131,	0.00016,0.00035,0.0044
25507	25335	Zn finger domain protein			scaffold_121	+	33114	36343													0.628	0.33	0.164	NaN	3.82927	0.2	1.90303	NaN	2.0122
124884	124712	Zn finger CCCH-type			scaffold_8	+	116648	119415													21.639	15.88	12.339	0.0826	1.75371	0.128	1.36266	0.319	1.28698	2233	peptidyl-prolyl cis-trans isomerase activity										5.2.1.8	Peptidylprolyl isomerase.	Peptidylproline (omega=180) = peptidylproline (omega=0).	\N	\N	\N	\N
99258	99086	Xylose reductase (NADPH dependent)			scaffold_7	-	52078	53677													68.653	55.761	11.919	0.00379	5.75996	0.277	1.2312	0.0122	4.67833	9710	oxidoreductase activity	IPR001395	Aldo/keto reductase	BlastProDom	PD000288	Q9P8R5_ASPNG_Q9P8R5;	1	1,	286,	1e-90	1.1.1.179	D-xylose 1-dehydrogenase (NADP+).	D-xylose + NADP(+) = D-xylono-1,5-lactone + NADPH.	\N	\N	\N	\N
111434	111262	WD-40 repeat containing			scaffold_196	+	5378	7145													71.862	85.831	50.728	0.184	1.41661	0.247	0.83725	0.0944	1.69198	2497	argininosuccinate synthase activity	IPR001680	WD40 repeat	FPrintScan	PR00320	GPROTEINBRPT	3	28,109,248,	42,123,262,	3.7e-06,3.7e-06,3.7e-06
108307	108135	WD-40 repeat containing			scaffold_104	-	48909	53035													44.861	42.635	27.109	0.0722	1.65484	0.718	1.05221	0.0953	1.57272			IPR001680	WD40 repeat	BlastProDom	PD000018	YA4E_SCHPO_Q09731;	1	231,	264,	2e-06
112435	112263	WD repeat-containing protein 61			scaffold_252	+	5387	6794													34.528	13.739	16.139	0.363	2.13941	0.0309	2.51314	0.845	0.851292			IPR001680	WD40 repeat	BlastProDom	PD000018	Q9SZQ5_ARATH_Q9SZQ5;	2	189,239,	223,272,	0.003,4e-06
113013	112841	WD repeat-containing protein 43			scaffold_307	-	12171	14699													26.257	22.27	15.306	0.131	1.71547	0.348	1.17903	0.281	1.45498			IPR001680	WD40 repeat	HMMPfam	PF00400	WD40	2	70,244,	181,282,	0.026,0.00024
33849	33677	von Willebrand domain containing			scaffold_14	-	28120	32406	0	0	0	0	0	0	0	0	2	0.25081	2	0.31138	31.363	26.988	63.129	0.366	0.496808	0.382	1.16211	0.265	0.427506			IPR002035	von Willebrand factor, type A	HMMPfam	PF00092	VWA	1	297,	469,	1e-10
127086	126914	Voltage-dependent ion-selective channel			scaffold_40	+	103110	104264	7	1.4376	7	1.2405	6	0.49529	5	0.97578	9	6.1042	9	7.4704	174.016	105.09	168.673	0.924	1.03168	0.0222	1.65588	0.171	0.62304	3933	mitochondrial outer membrane	IPR001925	Porin, eukaryotic type	FPrintScan	PR00185	EUKARYTPORIN	4	9,72,150,253,	24,87,161,270,	3.8e-15,3.8e-15,3.8e-15,3.8e-15								6.4048	5.0612
267965	267793	vacuole protein	TMHs		scaffold_201	-	32095	34415													61.868	79.008	26.381	0.199	2.34517	0.277	0.78306	0.112	2.99488	5939	zinc ion binding	IPR001594	Zinc finger, DHHC-type	BlastProDom	PD003041	Q9D3Q8_MOUSE_Q9D3Q8;	1	243,	276,	7e-09
33142	32970	Vacuolar sorting family			scaffold_3	-	460540	461585													48.439	42.762	38.869	0.31	1.24621	0.345	1.13276	0.683	1.10016	8400	protein transport	IPR005024	Snf7	HMMPfam	PF03357	Snf7	1	20,	192,	2e-49
128893	128721	Vacuolar sorting family			scaffold_99	-	46736	49759													14.928	23.127	19.504	0.349	0.765381	0.095	0.645479	0.549	1.18576	3827	intracellular	IPR007261	Vacuolar protein sorting 36	HMMPfam	PF04132	Vps36	1	281,	546,	6.7e-11
21431	21259	Vacuolar protein-sorting associated		>3000aa	scaffold_5	-	37265	48963													104.897	210.079	56.281	0.0602	1.86381	0.00927	0.499322	0.00727	3.73268	5786	protein localization	IPR009543	Vacuolar protein sorting-associated protein	HMMPfam	PF06650	DUF1162	1	2171,	2472,	4.5e-31
123226	123054	Vacuolar protein sorting associated protein			scaffold_300	+	2747	6345													36.523	33.841	12.856	0.0473	2.84093	0.684	1.07925	0.0455	2.63231	3727	protein binding	IPR001841	Zinc finger, RING-type	ProfileScan	PS50089	ZF_RING_2	1	957,	992,	9.435
110220	110048	Vacuolar membrane-associated protein			scaffold_150	-	23961	29003													31.719	26.683	10.368	0.037	3.05932	0.237	1.18873	0.0457	2.57359	5323	intracellular signaling cascade	IPR000591	Pleckstrin/ G-protein, interacting region	HMMPfam	PF00610	DEP	1	1075,	1148,	4.7e-24
113993	113821	Vacuolar calcium ion transporter	TMHs		scaffold_3	-	302847	305015													198.743	265.962	75.341	0.0458	2.63791	0.197	0.747261	0.0282	3.53011	4929	cation transport	IPR004837	Sodium/calcium exchanger membrane region	HMMPfam	PF01699	Na_Ca_ex	2	78,289,	245,422,	1e-24,5.7e-33
108560	108388	Vacuolar ATP synthase			scaffold_108	-	80802	83135													108.885	88.028	55.207	0.113	1.9723	0.116	1.23694	0.22	1.59451	8445	hydrogen ion transmembrane transporter activity	IPR000194	ATPase, F1/V1/A1 complex, alpha/beta subunit, nucleotide-binding	HMMPfam	PF00006	ATP-synt_ab	1	157,	385,	5.6e-96	3.6.3.14	H(+)-transporting two-sector ATPase.	ATP + H(2)O + H(+)(In) = ADP + phosphate + H(+)(Out).	\N	ATP synthesis	Energy Metabolism	METABOLIC	0.11787	0.84568
31832	31660	Urease accessory protein			scaffold_165	+	28327	29648													64.907	75.496	20	0.0185	3.24535	0.386	0.859741	0.0158	3.7748	3736	ATP binding	IPR003495	Cobalamin (vitamin B12) biosynthesis CobW-like	HMMPfam	PF02492	cobW	1	71,	243,	4.4e-57								0.23408	0.69184
125996	125824	UPF0662 protein			scaffold_22	+	25763	28622													68.992	88.576	56.079	0.44	1.23026	0.0789	0.778902	0.137	1.57949
119933	119761	uncharacterized oxidoreductase			scaffold_104	-	78132	78997													110.745	52.509	79.292	0.723	1.39667	0.0452	2.10907	0.673	0.662223	5830	metabolic process	IPR002198	Short-chain dehydrogenase/reductase SDR	FPrintScan	PR00080	SDRFAMILY	2	85,158,	96,177,	2e-06,2e-06	1.1.1.100	3-oxoacyl-[acyl-carrier protein] reductase.	(3R)-3-hydroxyacyl-[acyl-carrier protein] + NADP(+) = 3-oxoacyl- [acyl-carrier protein] + NADPH.	\N	Fatty acid biosynthesis (path 1)	Lipid Metabolism	METABOLIC	1.8418	4.0768
68171	67999	Uncharacterized oxidoreductase	SS		scaffold_32	+	151238	152568													38.867	19.001	32.153	0.486	1.20881	0.0199	2.04552	0.115	0.590956	9710	oxidoreductase activity	IPR000683	Oxidoreductase, N-terminal	HMMPfam	PF01408	GFO_IDH_MocA	1	6,	134,	1.2e-23
29793	29621	Uncharacterized membrane protein	TMHs		scaffold_44	+	150785	154370													156.758	188.373	8.43	0.0595	18.5953	0.511	0.832168	0.0441	22.3456	9320	membrane	IPR003864	Protein of unknown function DUF221	HMMPfam	PF02714	DUF221	1	379,	839,	2e-87
18128	17956	UDP-glucose pyrophosphorylase			scaffold_8	+	351060	353041													219.69	219.681	90.867	0.0253	2.41771	1	1.00004	0.0325	2.41761	5830	metabolic process	IPR002618	UTP--glucose-1-phosphate uridylyltransferase	HMMPfam	PF01704	UDPGP	1	38,	447,	7.3e-256	2.7.7.9	UTP--glucose-1-phosphate uridylyltransferase.	UTP + alpha-D-glucose 1-phosphate = diphosphate + UDP-glucose.	\N	Pentose and glucuronate interconversions	Carbohydrate Metabolism	METABOLIC	0.79727	1.4095
69390	69218	Ubiquitin thiosterase (prob)			scaffold_42	-	121623	122799													53.583	59.257	17.43	0.00717	3.07418	0.519	0.904248	0.0104	3.39971	2657	ubiquitin thiolesterase activity	IPR001578	Peptidase C12, ubiquitin carboxyl-terminal hydrolase 1	BlastProDom	PD350662	Q6K6Z5_EEEEE_Q6K6Z5;	1	16,	223,	8e-37	3.4.19.12	Ubiquitinyl hydrolase 1.	Thiol-dependent hydrolysis of ester, thiolester, amide, peptide and isopeptide bonds formed by the C-terminal Gly of ubiquitin (a 76-residue protein attached to proteins as an intracellular targeting signal).	\N	\N	\N	\N
123451	123279	Ubiquitin protein ligase			scaffold_336	-	10007	10647													31.455	12.828	26.23	0.785	1.1992	0.0288	2.45206	0.279	0.489058	12037	small conjugating protein ligase activity	IPR000608	Ubiquitin-conjugating enzyme, E2	BlastProDom	PD000461	Q6BZC0_EEEEE_Q6BZC0;	1	4,	138,	7e-55	6.3.2.19	Ubiquitin--protein ligase.	ATP + ubiquitin + protein lysine = AMP + diphosphate + protein N-ubiquityllysine.	\N	\N	\N	\N
98373	98201	Ubiquitin ligase complex protein			scaffold_3	-	151590	152649													932.25	926.357	589.707	0.091	1.58087	0.97	1.00636	0.0963	1.57088	4642	ubiquitin-dependent protein catabolic process	IPR016072	SKP1 component, dimerisation	HMMPfam	PF01466	Skp1	1	82,	159,	1.7e-54								1.7616	5.4386
31426	31254	Ubiquitin conjugating enzyme			scaffold_130	+	38867	43758													34.525	23.207	21.675	0.146	1.59285	0.0295	1.4877	0.814	1.07068	12037	small conjugating protein ligase activity	IPR000608	Ubiquitin-conjugating enzyme, E2	HMMPfam	PF00179	UQ_con	1	956,	1018,	0.0013	6.3.2.19	Ubiquitin--protein ligase.	ATP + ubiquitin + protein lysine = AMP + diphosphate + protein N-ubiquityllysine.	\N	\N	\N	\N
105264	105092	Ubiquitin conjugating enzyme			scaffold_51	-	98492	99608													72.717	64.014	50.563	0.186	1.43815	0.314	1.13595	0.381	1.26602	12037	small conjugating protein ligase activity	IPR000608	Ubiquitin-conjugating enzyme, E2	BlastProDom	PD000461	Q6CSQ8_EEEEE_Q6CSQ8;	1	4,	151,	4e-49	6.3.2.19	Ubiquitin--protein ligase.	ATP + ubiquitin + protein lysine = AMP + diphosphate + protein N-ubiquityllysine.	\N	\N	\N	\N
110265	110093	Ubiquitin conjugating enzyme			scaffold_151	-	44597	45580													52.295	90.3	46.051	0.696	1.13559	0.0579	0.579125	0.0999	1.96087	12037	small conjugating protein ligase activity	IPR000608	Ubiquitin-conjugating enzyme, E2	BlastProDom	PD000461	Q96FI0_HUMAN_Q96FI0;	1	2,	118,	4e-23	6.3.2.19	Ubiquitin--protein ligase.	ATP + ubiquitin + protein lysine = AMP + diphosphate + protein N-ubiquityllysine.	\N	\N	\N	\N
128007	127835	ubiquitin carboxyl-terminal hydrolase			scaffold_66	+	75545	80027													49.253	52.161	38.455	0.267	1.2808	0.661	0.94425	0.19	1.35642	2657	ubiquitin thiolesterase activity	IPR001394	Peptidase C19, ubiquitin carboxyl-terminal hydrolase 2	HMMPfam	PF00443	UCH	1	857,	1207,	7.5e-87	3.1.2.15	Ubiquitin thiolesterase.	Ubiquitin C-terminal thiolester + H(2)O = ubiquitin + a thiol.	\N	\N	\N	\N
106266	106094	Ubiquitin			scaffold_66	-	109184	109914	2	2.5176	2	2.3182	2	0.60237	2	2.0174	3	8.8332	3	12.542	1502.56	1419.43	1522.09	0.981	0.987166	0.76	1.05856	0.906	0.932552	4598	protein modification process	IPR000626	Ubiquitin	FPrintScan	PR00348	UBIQUITIN	3	11,32,53,	31,52,74,	4.1e-39,4.1e-39,4.1e-39								1.343	2.2938
128737	128565	Ubiquinol cytochrome C reductase			scaffold_92	-	71503	73179	2	0.22818	0	0	1	0.026278	0	0	0	0	0	0	38.637	27.721	47.997	0.515	0.804988	0.0445	1.39378	0.138	0.577557	2658	metalloendopeptidase activity	IPR011765	Peptidase M16, N-terminal	HMMPfam	PF00675	Peptidase_M16	1	26,	171,	1.1e-24	1.10.2.2	Ubiquinol--cytochrome c reductase.	QH(2) + 2 ferricytochrome c = Q + 2 ferrocytochrome c.	\N	Oxidative phosphorylation	Energy Metabolism	METABOLIC	0.81783	2.3045
31573	31401	Ubiquilin			scaffold_141	+	9943	11581	1	0.11633	2	0.37535	2	0.12582	0	0	1	0.24979	0	0	30.468	33.361	22.818	0.191	1.33526	0.467	0.913282	0.122	1.46205	4598	protein modification process	IPR000626	Ubiquitin	FPrintScan	PR00348	UBIQUITIN	2	42,63,	62,84,	5.5e-05,5.5e-05
130971	130799	Tyrosinase			scaffold_247	-	9327	11613	4	0.31102	7	0.41994	7	0.21777	8	0.84607	13	6.4828	16	10.222	75.334	175.616	103.336	0.869	0.72902	0.0999	0.42897	0.774	1.69947	5830	metabolic process	IPR002227	Tyrosinase	FPrintScan	PR00092	TYROSINASE	4	84,131,255,277,	101,136,266,295,	2e-13,2e-13,2e-13,2e-13
112347	112175	Tyrosinase			scaffold_247	-	12901	15127	2	0.14753	7	0.49173	9	0.48787	5	0.52014	1	0.15447	1	0.14191	193.913	253.148	20.185	0.0676	9.60679	0.255	0.766006	0.0452	12.5414	5830	metabolic process	IPR002227	Tyrosinase	FPrintScan	PR00092	TYROSINASE	4	87,134,251,273,	104,139,262,291,	2.6e-13,2.6e-13,2.6e-13,2.6e-13								0	0.48654
20736	20564	Tubulin			scaffold_282	+	15685	17812													387.163	390.116	477.769	0.637	0.810356	0.959	0.99243	0.645	0.816537	3737	GTP binding	IPR000217	Tubulin	FPrintScan	PR01161	TUBULIN	9	10,51,93,106,132,151,176,190,370,	30,70,104,130,150,172,189,210,398,	2.4e-102,2.4e-102,2.4e-102,2.4e-102,2.4e-102,2.4e-102,2.4e-102,2.4e-102,2.4e-102								2.1428	3.9059
80825	80653	TrpA			scaffold_367	-	1755	5715													14.39	23.774	5.437	0.0306	2.64668	0.0242	0.605283	0.00832	4.37263	2290	catalytic activity	IPR000873	AMP-dependent synthetase and ligase	FPrintScan	PR00154	AMPBINDING	2	186,198,	197,206,	55,55
28967	28795	tRNA modification GTPase			scaffold_24	-	60682	62884													29.177	37.21	16.433	0.123	1.77551	0.128	0.784117	0.0581	2.26435	3737	GTP binding	IPR002917	GTP-binding protein, HSR1-related	HMMPfam	PF01926	MMR_HSR1	1	289,	408,	3.1e-35
95831	95659	Tripeptidyl peptidase	SS		scaffold_219	-	30281	32900	4	0.60044	4	0.84199	3	0.19494	3	0.53163	0	0	0	0	48.484	19.768	24.646	0.406	1.96722	0.0101	2.45265	0.791	0.802077	2700	subtilase activity	IPR000209	Peptidase S8 and S53, subtilisin, kexin, sedolisin	HMMPfam	PF00082	Peptidase_S8	1	388,	525,	2.3e-06	3.4.14.9	Tripeptidyl-peptidase I.	Release of an N-terminal tripeptide from a polypeptide.	\N	\N	\N	\N	0.8331	1.2434
88562	88390	Tripeptidyl peptidase	SS		scaffold_45	+	70702	73272	1	0.06975	3	0.15683	1	0.016688	4	0.40826	0	0	0	0	242.753	153.799	66.355	0.132	3.6584	0.0923	1.57838	0.267	2.31782	2700	subtilase activity	IPR015366	Peptidase S53, propeptide	HMMPfam	PF09286	Pro-kuma_activ	1	35,	178,	8.5e-47	3.4.14.9	Tripeptidyl-peptidase I.	Release of an N-terminal tripeptide from a polypeptide.	\N	\N	\N	\N	0.54151	0.04926
103159	102987	Triose phosphate isomerase			scaffold_30	+	161597	162987	0	0	0	0	0	0	2	0.39775	3	1.2843	1	0.73964	65.715	52.992	128.454	0.416	0.511584	0.125	1.24009	0.285	0.412537	3167	triose-phosphate isomerase activity	IPR000652	Triosephosphate isomerase	BlastProDom	PD001005	TPIS_COPCI_Q12574;	1	3,	251,	2e-96	5.3.1.1	Triosephosphate isomerase.	D-glyceraldehyde 3-phosphate = glycerone phosphate.	\N	Carbon fixation	Energy Metabolism	METABOLIC	0.42242	1.2754
105599	105427	Transporter, Quinate	TMHs		scaffold_56	+	97565	100026													43.322	113.533	83.918	0.736	0.516242	0.0447	0.381581	0.885	1.3529	3642	sugar:hydrogen symporter activity	IPR003663	Sugar transporter	FPrintScan	PR00171	SUGRTRNSPORT	5	42,130,318,412,435,	52,149,328,433,447,	1.4e-23,1.4e-23,1.4e-23,1.4e-23,1.4e-23	5.3.1.4	L-arabinose isomerase.	L-arabinose = L-ribulose.	\N	Pentose and glucuronate interconversions	Carbohydrate Metabolism	METABOLIC
69839	69667	Transporter, MFS	TMHs		scaffold_46	-	150977	152282													201.428	273.839	18.682	0.0172	10.7819	0.281	0.735571	0.0136	14.6579	3642	sugar:hydrogen symporter activity	IPR003663	Sugar transporter	FPrintScan	PR00171	SUGRTRNSPORT	3	55,220,318,	74,230,339,	3.6e-13,3.6e-13,3.6e-13
100929	100757	Transporter, MFS	TMHs		scaffold_15	-	58685	60888													75.333	103.849	10.621	0.0241	7.09283	0.272	0.725409	0.0204	9.7777	3546	transporter activity	IPR011701	Major facilitator superfamily MFS-1	HMMPfam	PF07690	MFS_1	1	2,	350,	3.6e-37
79200	79028	Transporter, MFS	TMHs		scaffold_233	+	28529	30568													9.108	13.103	1.378	0.0176	6.60958	0.149	0.695108	0.00475	9.50871	3546	transporter activity	IPR011701	Major facilitator superfamily MFS-1	HMMPfam	PF07690	MFS_1	1	47,	497,	2.7e-26
73772	73600	Transporter, MFS	TMHs		scaffold_95	+	27006	29449													63.063	143.476	8.866	0.00347	7.1129	0.00598	0.439537	0.00102	16.1827	3546	transporter activity	IPR005828	General substrate transporter	HMMPfam	PF00083	Sugar_tr	1	47,	499,	7.5e-76	5.3.1.4	L-arabinose isomerase.	L-arabinose = L-ribulose.	\N	Pentose and glucuronate interconversions	Carbohydrate Metabolism	METABOLIC
79729	79557	Transporter, MFS	TMHs		scaffold_261	-	11656	12681													21.906	9.418	14.558	0.182	1.50474	0.00903	2.32597	0.147	0.64693			IPR016196	MFS general substrate transporter	superfamily	SSF103473	MFS general substrate transporter	1	57,	154,	0.0045
358365	358193	Transporter MFS	TMHs		scaffold_36	-	114822	117181													3.511	2.481	17.757	0.0154	0.197725	0.281	1.41516	0.00297	0.13972	3546	transporter activity	IPR011701	Major facilitator superfamily MFS-1	HMMPfam	PF07690	MFS_1	1	78,	418,	9.4e-29
59915	59743	Transporter MFS	TMHs		scaffold_36	-	117690	119243													16.17	11.437	83.163	0.0327	0.194437	0.347	1.41383	0.00161	0.137525	3546	transporter activity	IPR011701	Major facilitator superfamily MFS-1	HMMPfam	PF07690	MFS_1	1	17,	355,	1.9e-26
36805	36633	Transporter	TMHs		scaffold_118	-	22091	24849													176.538	218.081	75.673	0.0346	2.33291	0.121	0.809507	0.0201	2.88189	9321	integral to membrane	IPR004837	Sodium/calcium exchanger membrane region	HMMPfam	PF01699	Na_Ca_ex	2	125,377,	274,510,	1.8e-19,1.1e-31
119757	119585	Transporter	TMHs		scaffold_99	-	11950	14496													29.078	13.864	22.333	0.809	1.30202	0.00498	2.09737	0.649	0.620785	8851	tetracycline:hydrogen antiporter activity	IPR001411	Tetracycline resistance protein, TetB	FPrintScan	PR01036	TCRTETB	4	29,124,154,423,	53,144,178,442,	4.3e-07,4.3e-07,4.3e-07,4.3e-07
35122	34950	Transporter	TMHs		scaffold_42	+	39772	42374													36.174	40.97	4.799	0.000718	7.53782	0.552	0.882939	0.00198	8.5372	8851	tetracycline:hydrogen antiporter activity	IPR001411	Tetracycline resistance protein, TetB	FPrintScan	PR01036	TCRTETB	3	82,172,202,	106,192,226,	2.3e-10,2.3e-10,2.3e-10
73574	73402	Transporter	TMHs		scaffold_92	+	76944	79149													3.389	5.024	114.111	0.00257	0.0296992	0.0704	0.674562	0.00358	0.0440273	8851	tetracycline:hydrogen antiporter activity	IPR001411	Tetracycline resistance protein, TetB	FPrintScan	PR01036	TCRTETB	4	57,146,176,381,	81,166,200,401,	1.3e-08,1.3e-08,1.3e-08,1.3e-08
27886	27714	Transporter	TMHs		scaffold_7	+	10303	12305													81.237	49.102	14.55	0.0218	5.5833	0.00878	1.65445	0.0403	3.37471	4929	cation transport	IPR002524	Cation efflux protein	HMMPfam	PF01545	Cation_efflux	1	112,	393,	1.9e-41
78121	77949	Transporter	TMHs, Mitochondrial tricarboxylate/dicarboxylate carrier proteins		scaffold_190	-	27765	29037													51.854	20.887	10.287	0.0241	5.04073	0.0119	2.4826	0.159	2.03043	3708	binding	IPR002067	Mitochondrial carrier protein	FPrintScan	PR00926	MITOCARRIER	6	17,30,77,127,178,225,	30,44,97,145,196,247,	1.2e-10,1.2e-10,1.2e-10,1.2e-10,1.2e-10,1.2e-10
34082	33910	Transporter	TMHs		scaffold_18	-	77180	79671													166.406	283.724	9.851	0.000171	16.8923	0.0574	0.586507	0.000396	28.8015	3642	sugar:hydrogen symporter activity	IPR005828	General substrate transporter	HMMPfam	PF00083	Sugar_tr	1	40,	485,	2e-77	5.3.1.4	L-arabinose isomerase.	L-arabinose = L-ribulose.	\N	Pentose and glucuronate interconversions	Carbohydrate Metabolism	METABOLIC
123927	123755	Transporter	TMHs		scaffold_1	-	41646	43941													704.443	226.394	203.451	0.0236	3.46247	0.0282	3.11158	0.832	1.11277	3546	transporter activity	IPR011701	Major facilitator superfamily MFS-1	HMMPfam	PF07690	MFS_1	1	88,	481,	6.2e-53
124723	124551	Transporter	TMHs		scaffold_6	-	268170	271720													15.954	11.793	4.678	0.0154	3.41043	0.109	1.35284	0.0269	2.52095	3546	transporter activity	IPR011701	Major facilitator superfamily MFS-1	HMMPfam	PF07690	MFS_1	1	90,	495,	1.1e-36
28102	27930	Transporter	TMHs		scaffold_9	+	206137	208504													15.781	16.193	5.017	0.0146	3.14551	0.89	0.974557	0.0203	3.22763	3546	transporter activity	IPR011701	Major facilitator superfamily MFS-1	HMMPfam	PF07690	MFS_1	1	59,	479,	4.9e-34
42664	42492	Transporter	TMHs		scaffold_56	-	54242	55861													29.428	37.624	2.786	0.000434	10.5628	0.574	0.78216	0.0112	13.5047	3546	transporter activity	IPR011701	Major facilitator superfamily MFS-1	HMMPfam	PF07690	MFS_1	1	9,	414,	3.6e-49
35181	35009	Transporter			scaffold_44	-	27710	30383													18.322	27.143	22.572	0.84	0.811714	0.102	0.675017	0.858	1.20251	3546	transporter activity	IPR011701	Major facilitator superfamily MFS-1	HMMPfam	PF07690	MFS_1	1	36,	469,	3e-30
32639	32467	Transmembrane protein	SS/TMH		scaffold_306	-	16743	19004													74.514	34.72	98.765	0.623	0.754458	0.0247	2.14614	0.111	0.351542	9321	integral to membrane	IPR013657	UAA transporter	HMMPfam	PF08449	UAA	1	54,	394,	0.0018
93477	93305	Translocase of outer membrane subunit	SS/TMHs		scaffold_133	+	5138	7259													51.461	36.375	54.735	0.853	0.940185	0.0498	1.41474	0.234	0.664566	3838	nucleus	IPR016042	Protein import receptor MAS20, conserved region	FPrintScan	PR00351	OM20RECEPTOR	4	5,23,84,119,	19,40,104,136,	2.5e-18,2.5e-18,2.5e-18,2.5e-18
129109	128937	Translin			scaffold_108	-	49799	50858													54.81	66.758	16.534	0.0209	3.31499	0.374	0.821025	0.0211	4.03762	19030	sequence-specific DNA binding	IPR002848	Translin	HMMPfam	PF01997	Translin	1	17,	215,	3.4e-25
223051	222879	Translation initiation inhibitor			scaffold_161	-	6110	7184													45.919	31.836	29.16	0.21	1.57473	0.0535	1.44236	0.792	1.09177			IPR006175	Endoribonuclease L-PSP	HMMPfam	PF01042	Ribonuc_L-PSP	1	42,	160,	1.1e-56
98901	98729	Translation Elongation Factor			scaffold_5	-	153176	155403	6	1.4305	5	0.56545	7	0.34227	4	0.84041	2	0.41158	3	0.58598	1911.85	1634.05	2304.85	0.661	0.829487	0.293	1.17	0.405	0.708961	2378	GTPase activity	IPR000795	Protein synthesis factor, GTP-binding	FPrintScan	PR00315	ELONGATNFCT	5	9,68,88,104,148,	22,76,98,115,157,	1.4e-24,1.4e-24,1.4e-24,1.4e-24,1.4e-24								4.9145	8.8281
101885	101713	Translation Elongation Factor			scaffold_21	-	112605	115784	2	0.20813	1	0.035251	2	0.024045	0	0	0	0	0	0	409.267	351.783	447.919	0.843	0.913708	0.363	1.16341	0.568	0.785372	3737	GTP binding	IPR000795	Protein synthesis factor, GTP-binding	FPrintScan	PR00315	ELONGATNFCT	5	21,65,101,117,153,	34,73,111,128,162,	1.1e-14,1.1e-14,1.1e-14,1.1e-14,1.1e-14								2.9407	4.0096
129860	129688	Transducin beta-like protein			scaffold_147	+	8285	11502													16.701	11.15	12.157	0.2	1.37378	0.0825	1.49785	0.746	0.917167	4513	rRNA processing	IPR001680	WD40 repeat	BlastProDom	PD000018	Q9LFE2_ARATH_Q9LFE2;	3	560,613,653,	591,645,687,	9e-07,3e-06,6e-06	3.1.1.47	2-acetyl-1-alkylglycerophosphocholine esterase.	2-acetyl-1-alkyl-sn-glycero-3-phosphocholine + H(2)O = 1-alkyl-sn- glycero-3-phosphocholine + acetate.	\N	Glycerolipid metabolism	Metabolism of Complex Lipids	METABOLIC
100056	99884	Transcriptional regulatory protein			scaffold_10	-	148885	151986													141.098	181.652	42.944	0.0379	3.28563	0.265	0.776749	0.0149	4.22997	2196	transcription factor activity	IPR001138	Fungal transcriptional regulatory protein, N-terminal	FPrintScan	PR00054	FUNGALZNCYS	3	30,37,49,	36,43,59,	2.9,2.9,2.9
101821	101649	Transcriptional corepressor Sin3			scaffold_21	+	29925	34315													50.631	33.331	14.15	0.0414	3.57816	0.0408	1.51904	0.0732	2.35555	3838	nucleus	IPR003822	Paired amphipathic helix	HMMPfam	PF02671	PAH	3	45,242,442,	91,290,487,	2.8e-15,1.1e-13,2.1e-05
99313	99141	Transcription initiation factor		1872aa, multi domain	scaffold_7	+	142964	149729													124.569	177.94	48.316	0.0212	2.57821	0.0458	0.700062	0.00569	3.68284	5909	metallopeptidase activity	IPR001487	Bromodomain	FPrintScan	PR00503	BROMODOMAIN	4	1648,1664,1680,1698,	1661,1680,1698,1717,	9.5e-14,9.5e-14,9.5e-14,9.5e-14
22091	21919	Transcription factor Xbp1p-like			scaffold_12	+	140429	141109													8.472	4.636	18.997	0.262	0.445965	0.106	1.82744	0.0658	0.244039			IPR016144	Mlu1-box-binding protein, DNA-binding	superfamily	SSF54616	DNA-binding domain of Mlu1-box binding protein MBP1	1	38,	140,	3.7e-25
29187	29015	Transcription factor SPT8			scaffold_28	+	146005	148573													61.959	66.321	21.424	0.0329	2.89204	0.635	0.934229	0.027	3.09564			IPR001680	WD40 repeat	HMMPfam	PF00400	WD40	3	244,431,528,	282,456,555,	0.00051,0.00014,0.002
79220	79048	Transcription factor Msn2/5-like		79aa	scaffold_234	-	996	1271													347.387	299.681	28.273	0.0176	12.2869	0.457	1.15919	0.0166	10.5995	2175	nucleic acid binding	IPR007087	Zinc finger, C2H2-type	BlastProDom	PD000003	MIG2_YEAST_P53035;	2	9,35,	30,59,	0.001,0.003
47073	46901	Transcription factor Mot3p-like			scaffold_99	-	37454	37624													0.779	------	------	NaN	#VALUE!	NaN	#VALUE!	NaN	#VALUE!	2175	nucleic acid binding	IPR007087	Zinc finger, C2H2-type	BlastProDom	PD000003	Q8J0W3_EEEEE_Q8J0W3;	2	4,33,	28,55,	0.003,0.0001
76479	76307	Transcription factor Gsm1p-like			scaffold_145	-	1815	4654													57.901	55.339	26.081	0.0284	2.22005	0.728	1.0463	0.0325	2.12181	3228	signal transducer activity	IPR001138	Fungal transcriptional regulatory protein, N-terminal	HMMPfam	PF00172	Zn_clus	1	67,	107,	0.00046
131112	130940	Transcription factor Gls1p-like			scaffold_269	-	16898	21079													47.899	42.111	52.983	0.784	0.904045	0.412	1.13745	0.53	0.794802	3642	sugar:hydrogen symporter activity	IPR013129	Transcription factor jumonji	HMMPfam	PF02373	JmjC	1	403,	519,	2.9e-51
89384	89212	Transcription factor Fkh1p			scaffold_55	-	97253	99467													71.769	80.185	41.956	0.0927	1.71058	0.349	0.895043	0.0604	1.91117	2196	transcription factor activity	IPR001766	Fork head transcription factor	BlastProDom	PD000425	Q6CCI2_EEEEE_Q6CCI2;	1	250,	330,	1e-13
20186	20014	Transcription factor Crz1p-like			scaffold_143	-	13540	16903													92.422	68.941	65.068	0.312	1.42039	0.141	1.3406	0.872	1.05952	2175	nucleic acid binding	IPR007087	Zinc finger, C2H2-type	HMMPfam	PF00096	zf-C2H2	3	637,667,697,	661,691,724,	4.8e-06,6.8e-05,0.0013
99199	99027	Transcription corepressor			scaffold_6	-	293045	296701													44.522	45.808	24.94	0.0684	1.78516	0.88	0.971926	0.065	1.83673	3838	nucleus	IPR001680	WD40 repeat	BlastProDom	PD000018	Q8T0C3_DROME_Q8T0C3;	3	29,71,172,	51,105,205,	0.002,0.001,2e-06
103164	102992	Transaldolase			scaffold_30	-	177547	178910	4	1.2158	3	0.30752	6	0.2909	3	0.45706	5	2.1318	3	1.1873	381.018	259.629	278.378	0.33	1.36871	0.0862	1.46755	0.854	0.932649	4143	carbohydrate metabolic process	IPR001585	Transaldolase	HMMPfam	PF00923	Transaldolase	1	14,	321,	2.8e-163	2.2.1.2	Transaldolase.	Sedoheptulose 7-phosphate + D-glyceraldehyde 3-phosphate = D-erythrose 4-phosphate + D-fructose 6-phosphate.	\N	Pentose phosphate pathway	Carbohydrate Metabolism	METABOLIC	3.5057	1.6486
126424	126252	Trans-sialidase			scaffold_28	+	84862	86704	3	0.73079	2	0.37021	2	0.1241	3	0.77526	8	6.5083	6	3.6274	360.702	406.847	866.307	0.0986	0.416367	0.298	0.886579	0.121	0.469634	2356	DNA-directed RNA polymerase activity										2.7.7.6	DNA-directed RNA polymerase.	N nucleoside triphosphate = N diphosphate + {RNA}(N).	\N	RNA polymerase	TRANSCRIPTION	REGULATORY
127924	127752	Tranporter, MFS	TMHs		scaffold_63	+	122557	124724													107.073	162.206	18.627	0.0363	5.74827	0.0922	0.660105	0.0221	8.70811	3642	sugar:hydrogen symporter activity	IPR003663	Sugar transporter	FPrintScan	PR00171	SUGRTRNSPORT	5	19,105,270,362,385,	29,124,280,383,397,	4.9e-17,4.9e-17,4.9e-17,4.9e-17,4.9e-17	5.3.1.4	L-arabinose isomerase.	L-arabinose = L-ribulose.	\N	Pentose and glucuronate interconversions	Carbohydrate Metabolism	METABOLIC
33988	33816	Tip elongation aberrant protein			scaffold_16	+	180643	185398													59.233	59.334	28.311	0.0416	2.09223	0.994	0.998298	0.0378	2.09579	5250	signal transduction	IPR001452	Src homology-3	BlastProDom	PD000066	Q8T101_BOMMO_Q8T101;	1	72,	121,	0.0001
86904	86732	Tip elongation aberrant protein			scaffold_29	-	142032	143294													8.349	4.955	5.31	0.343	1.57232	0.116	1.68496	0.879	0.933145			IPR006652	Kelch repeat type 1	HMMPfam	PF01344	Kelch_1	6	16,66,118,174,222,272,	61,111,147,219,257,303,	1.8e-05,3.7e-07,9.9e-05,2.7e-09,0.00015,0.001
14046	13874	TIF alpha subunit			scaffold_80	-	94881	96683													103.408	124.856	48.569	0.0684	2.12909	0.217	0.828218	0.039	2.57069	2198	RNA polymerase II transcription factor activity	IPR002853	Transcription factor TFIIE, alpha subunit	HMMPfam	PF02002	TFIIE_alpha	1	19,	195,	5e-32
89769	89597	Threonine synthase			scaffold_61	+	51950	53984													25.404	20.9	17.419	0.438	1.45841	0.227	1.2155	0.713	1.19984	4650	amino acid metabolic process	IPR001926	Pyridoxal phosphate-dependent enzyme, beta subunit	HMMPfam	PF00291	PALP	1	83,	436,	1.4e-22								0.054205	0.52546
30401	30229	Threonine ammonia-lyase			scaffold_69	-	75993	78324													38.335	45.334	29.215	0.249	1.31217	0.233	0.845613	0.117	1.55174	4650	amino acid metabolic process	IPR001926	Pyridoxal phosphate-dependent enzyme, beta subunit	HMMPfam	PF00291	PALP	1	44,	342,	1.1e-92
20693	20521	threonine 3-dehydrogenase			scaffold_262	-	12798	14261													128.181	120.141	46.728	0.0195	2.74313	0.712	1.06692	0.0313	2.57107	5939	zinc ion binding	IPR013149	Alcohol dehydrogenase, zinc-binding	HMMPfam	PF00107	ADH_zinc_N	1	163,	307,	2.7e-15	1.1.1.14	L-iditol 2-dehydrogenase.	L-iditol + NAD(+) = L-sorbose + NADH.	\N	Fructose and mannose metabolism	Carbohydrate Metabolism	METABOLIC	0.1817	1.3043
111938	111766	Thioredoxin reductase			scaffold_221	-	25177	26390													97.644	49.375	90.479	0.774	1.07919	0.00196	1.9776	0.0724	0.545707	4283	electron transport	IPR001327	Pyridine nucleotide-disulphide oxidoreductase, NAD-binding region	BlastProDom	PD000139	Q6BIS1_EEEEE_Q6BIS1;	1	118,	188,	4e-28
78142	77970	thioredoxin			scaffold_191	+	20768	21229	3	3.3946	3	2.423	3	0.81221	3	3.6012	1	0.84254	1	0.77407	898.389	1078.73	651.514	0.299	1.37893	0.187	0.832823	0.148	1.65572	4789	glycerol ether metabolic process	IPR006662	Thioredoxin-related	FPrintScan	PR00421	THIOREDOXIN	3	21,29,68,	29,38,79,	1.7e-08,1.7e-08,1.7e-08								3.3389	2.3974
89748	89576	Thiol-specific monooxygenase			scaffold_61	-	4253	5567													135.41	50.432	50.61	0.11	2.67556	0.00273	2.685	0.995	0.996483	2890	flavin-containing monooxygenase activity	IPR001327	Pyridine nucleotide-disulphide oxidoreductase, NAD-binding region	BlastProDom	PD000139	Q9LLN1_ORYSA_Q9LLN1;	1	105,	153,	0.007	1.14.13.8	Dimethylaniline monooxygenase (N-oxide forming).	N,N-dimethylaniline + NADPH + O(2) = N,N-dimethylaniline N-oxide + NADP(+) + H(2)O.	FAD.	\N	\N	\N
115322	115150	Thaumatin-like protein	SS		scaffold_14	-	150844	152128	2	0.37157	1	0.12489	1	0.041865	3	0.62851	2	1.2722	2	1.6584	198.253	78.531	8.034	0.0468	24.6767	0.134	2.52452	0.06	9.77483			IPR001938	Thaumatin, pathogenesis-related	BlastProDom	PD001321	Q94HS1_ORYSA_Q94HS1;	1	27,	255,	2e-40
250950	250778	Tetraspanin	TMHs		scaffold_19	+	183431	184722													532.035	502.282	1346.22	0.0449	0.395205	0.784	1.05924	0.045	0.373104
359236	359064	Terpenoid synthesis			scaffold_36	-	156793	158469													0.9	0.648	1.345	0.663	0.669145	0.442	1.38889	0.344	0.481784	281	magnesium ion binding	IPR005630	Terpene synthase, metal-binding	HMMPfam	PF03936	Terpene_synth_C	1	41,	274,	0.0018
367887	367715	Terpenoid synthesis			scaffold_4	+	11615	13440													32.321	24.346	24.93	0.508	1.29647	0.0765	1.32757	0.956	0.976574	281	magnesium ion binding	IPR005630	Terpene synthase, metal-binding	HMMPfam	PF03936	Terpene_synth_C	1	162,	281,	4.5e-10
126910	126738	Terpenoid synthesis			scaffold_36	-	159035	160807													55.814	49.791	25.877	0.0805	2.1569	0.697	1.12097	0.0537	1.92414	281	magnesium ion binding	IPR005630	Terpene synthase, metal-binding	HMMPfam	PF03936	Terpene_synth_C	1	149,	263,	2.1e-06
114995	114823	Terpenoid synthesis			scaffold_11	-	159167	160286													4.501	5.3	0.801	0.0135	5.61923	0.469	0.849245	0.0144	6.61673	281	magnesium ion binding	IPR005630	Terpene synthase, metal-binding	HMMPfam	PF03936	Terpene_synth_C	1	205,	267,	0.00041
87821	87649	Terpene cyclase			scaffold_37	-	66661	69475													28.547	23.927	37.168	0.549	0.768053	0.239	1.19309	0.321	0.643753	2290	catalytic activity	IPR001330	Prenyltransferase/squalene oxidase	HMMPfam	PF00432	Prenyltrans	5	121,480,557,606,664,	164,500,599,659,684,	5e-09,0.028,2.9e-05,4.3e-07,0.2	5.4.99.7	Lanosterol synthase.	(S)-2,3-epoxysqualene = lanosterol.	\N	Sterol biosynthesis	Lipid Metabolism	METABOLIC
93928	93756	Syntaxin-21	TMHs		scaffold_144	+	51241	52497													103.135	138.766	66.403	0.0954	1.55317	0.202	0.74323	0.057	2.08975	9320	membrane	IPR006011	Syntaxin, N-terminal	HMMPfam	PF00804	Syntaxin	1	25,	120,	0.067
23046	22874	Syntaxin	TMHs		scaffold_28	+	60915	62134	0	0	0	0	0	0	0	0	2	0.63999	1	0.27996	131.37	127.421	120.144	0.714	1.09344	0.813	1.03099	0.827	1.06057	9320	membrane	IPR006011	Syntaxin, N-terminal	HMMPfam	PF00804	Syntaxin	1	30,	128,	1.2e-15
29214	29042	Swarming motility protein ybiA			scaffold_29	+	79882	80853													29.451	39.804	25.486	0.613	1.15558	0.0885	0.739901	0.174	1.5618			IPR012816	Conserved hypothetical protein CHP02464	HMMPfam	PF08719	DUF1768	1	31,	174,	1.5e-47
114009	113837	Suppressor protein			scaffold_3	-	351861	353767													51.683	54.131	32.393	0.282	1.5955	0.812	0.954776	0.245	1.67107	2715	exo-alpha-sialidase activity	IPR007718	SRP40, C-terminal	HMMPfam	PF05022	SRP40_C	1	380,	481,	1.4e-30	3.2.1.18	Exo-alpha-sialidase.	Hydrolysis of alpha-(2->3)-, alpha-(2->6)-, alpha-(2->8)-glycosidic linkages of terminal sialic residues in oligosaccharides, glycoproteins, glycolipids, colominic acid and synthetic substrates.	\N	N-Glycan degradation	Metabolism of Complex Carbohydrates	METABOLIC
385606	385434	Superkiller protein			scaffold_45	+	88021	93605													20.974	23.839	6.668	0.0445	3.14547	0.291	0.879819	0.0301	3.57513	24	alpha-1,6-mannosyltransferase activity	IPR001440	Tetratricopeptide TPR-1	HMMPfam	PF00515	TPR_1	6	39,595,698,982,1142,1185,	72,613,731,1015,1175,1218,	0.084,0.33,0.15,0.0095,0.095,0.044	2.4.1.-	Hexosyltransferases.	\N	\N	O-Glycans biosynthesis	Metabolism of Complex Carbohydrates	METABOLIC
17779	17607	sugar transporter	TMHs		scaffold_2	+	205336	208114	1	0.079106	0	0	0	0	0	0	2	0.53858	2	0.32083	138.549	169.602	85.963	0.0887	1.61173	0.219	0.816907	0.0417	1.97297	3642	sugar:hydrogen symporter activity	IPR003663	Sugar transporter	FPrintScan	PR00171	SUGRTRNSPORT	5	29,115,277,364,387,	39,134,287,385,399,	1.3e-23,1.3e-23,1.3e-23,1.3e-23,1.3e-23	5.3.1.4	L-arabinose isomerase.	L-arabinose = L-ribulose.	\N	Pentose and glucuronate interconversions	Carbohydrate Metabolism	METABOLIC
97369	97197	sugar transporter	TMHs		scaffold_1	+	12034	14703													49.843	24.593	19.283	0.586	2.58482	0.0475	2.02671	0.896	1.27537	3642	sugar:hydrogen symporter activity	IPR003663	Sugar transporter	FPrintScan	PR00171	SUGRTRNSPORT	5	68,162,330,417,440,	78,181,340,438,452,	6.6e-15,6.6e-15,6.6e-15,6.6e-15,6.6e-15	5.3.1.4	L-arabinose isomerase.	L-arabinose = L-ribulose.	\N	Pentose and glucuronate interconversions	Carbohydrate Metabolism	METABOLIC
106904	106732	sugar transporter	TMHs		scaffold_76	-	63170	65263													71.715	49.596	35.505	0.198	2.01986	0.23	1.44598	0.499	1.39687	3642	sugar:hydrogen symporter activity	IPR003663	Sugar transporter	FPrintScan	PR00171	SUGRTRNSPORT	4	21,123,391,414,	31,142,412,426,	3.5e-13,3.5e-13,3.5e-13,3.5e-13	5.3.1.4	L-arabinose isomerase.	L-arabinose = L-ribulose.	\N	Pentose and glucuronate interconversions	Carbohydrate Metabolism	METABOLIC
88752	88580	Succinyl-CoA:alpha-ketoacid-CoA transferase			scaffold_47	+	53357	55687													96.469	39.138	31.604	0.265	3.05243	0.0019	2.46484	0.83	1.23839	5830	metabolic process	IPR004165	Coenzyme A transferase	HMMPfam	PF01144	CoA_trans	2	34,302,	267,503,	7e-74,1.1e-58	2.8.3.5	3-oxoacid CoA-transferase.	Succinyl-CoA + a 3-oxo acid = succinate + a 3-oxo-acyl-CoA.	\N	Valine, leucine and isoleucine degradation	Amino Acid Metabolism	METABOLIC
105816	105644	Succinate dehydrogenase membrane anchor subunit and related proteins			scaffold_60	+	42658	43600													245.415	149.001	159.334	0.0851	1.54026	0.0313	1.64707	0.798	0.935149	3721	iron ion binding	IPR007992	CybS	HMMPfam	PF05328	CybS	1	21,	168,	1.5e-35	1.3.5.1	Succinate dehydrogenase (ubiquinone).	Succinate + ubiquinone = fumarate + ubiquinol.	FAD; Iron-sulfur.	Citrate cycle (TCA cycle)	Carbohydrate Metabolism	METABOLIC
493052	492880	subtilisin-like protease			scaffold_131	+	15409	18931	3	0.16794	2	0.078411	1	0.012897	2	0.11654	0	0	0	0	24.877	28.185	33.893	0.636	0.733986	0.317	0.882633	0.782	0.831588	2700	subtilase activity	IPR000209	Peptidase S8 and S53, subtilisin, kexin, sedolisin	FPrintScan	PR00723	SUBTILISIN	3	95,150,462,	114,163,478,	4e-19,4e-19,4e-19								0	0.45296
101439	101267	Structural maintenance of chromosomes protein 5			scaffold_18	-	67053	71762													100.621	108.988	35.471	0.0243	2.83671	0.572	0.92323	0.0184	3.07259	3736	ATP binding	IPR003395	RecF/RecN/SMC protein, N-terminal	HMMPfam	PF02463	SMC_N	1	122,	1118,	1.6e-10	3.6.4.1	Myosin ATPase.	ATP + H(2)O = ADP + phosphate.	\N	Purine metabolism	Nucleotide Metabolism	METABOLIC
22181	22009	stress response protein	SS		scaffold_13	+	210061	211403	3	0.67653	3	0.60422	3	0.20254	3	0.71769	3	1.4527	3	1.0245	30.339	36.823	22.842	0.796	1.32821	0.749	0.823914	0.649	1.61207
450349	450177	Stress response protein			scaffold_76	-	84238	85348													47.252	36.348	37.921	0.359	1.24606	0.211	1.29999	0.885	0.958519
182880	182708	Stress response A/B barrel domain	TMHs		scaffold_128	+	44140	45213													5.31	2.844	3.694	0.562	1.43747	0.0193	1.86709	0.67	0.769897			IPR013097	Stress responsive alpha-beta barrel	HMMPfam	PF07876	Dabb	1	42,	145,	3.4e-19
96715	96543	Sterol-4-alpha-carboxylate 3-dehydrogenase, decarboxylating			scaffold_284	+	4933	6578													40.889	39.897	13.656	0.0342	2.99421	0.924	1.02486	0.0362	2.92157	2320	3-beta-hydroxy-delta5-steroid dehydrogenase activity	IPR002225	3-beta hydroxysteroid dehydrogenase/isomerase	HMMPfam	PF01073	3Beta_HSD	1	6,	268,	3.6e-61	1.1.1.170	3-beta-hydroxy-4-alpha-methylcholestenecarboxylate 3-dehydrogenase (decarboxylating).	3-beta-hydroxy-4-alpha-methyl-5-alpha-cholest-7-ene-4-beta-carboxylate + NAD(+) = 4-alpha-methyl-5-alpha-cholest-7-en-3-one + CO(2) + NADH.	\N	\N	\N	\N
37812	37640	Sterol O-acyltransferase	TMHs		scaffold_202	+	43857	45067													53.81	55.679	30.283	0.192	1.7769	0.926	0.966433	0.139	1.83862
104330	104158	Sterol carrier protein			scaffold_41	-	26758	28865													32.467	11.666	16.907	0.35	1.92033	0.0177	2.78304	0.587	0.69001	2290	catalytic activity	IPR002155	Thiolase	ScanRegExp	PS00098	THIOLASE_1	1	81,	99,	NA	2.3.1.16	Acetyl-CoA C-acyltransferase.	Acyl-CoA + acetyl-CoA = CoA + 3-oxoacyl-CoA.	\N	Benzoate degradation via hydroxylation	Biodegradation of Xenobiotics	METABOLIC
30629	30457	Spliceosomal zinc-finger containing			scaffold_79	+	95677	96573													31.282	12.952	15.036	0.216	2.08047	0.021	2.41523	0.786	0.861399	2175	nucleic acid binding	IPR001841	Zinc finger, RING-type	HMMPfam	PF00097	zf-C3HC4	1	83,	120,	0.0024
131265	131093	spindle pole body associated protein			scaffold_296	+	17181	18316													160.297	141.198	76.831	0.0739	2.08636	0.457	1.13526	0.107	1.83777			IPR012919	Sad1/UNC-like, C-terminal	HMMPfam	PF07738	Sad1_UNC	1	148,	311,	1.3e-05
174107	173935	Spherulin 1b	TMHs		scaffold_12	-	205388	207158													129.889	107.102	31.544	0.0557	4.11771	0.531	1.21276	0.073	3.39532	13038	manganese ion binding	IPR001929	Germin	FPrintScan	PR00325	GERMIN	3	151,182,215,	171,202,230,	7.6e-17,7.6e-17,7.6e-17
101082	100910	Sorbitol ddehydrogenase		Possible xylulose reductase	scaffold_15	-	267789	269732													234.382	183.101	90.007	0.0415	2.60404	0.136	1.28007	0.0587	2.0343	5939	zinc ion binding	IPR011597	GroES-related	BlastProDom	PD040557	Q8KCJ7_CHLTE_Q8KCJ7;	1	170,	340,	8e-05	1.1.1.14	L-iditol 2-dehydrogenase.	L-iditol + NAD(+) = L-sorbose + NADH.	\N	Fructose and mannose metabolism	Carbohydrate Metabolism	METABOLIC	0.73019	1.1884
71505	71333	Solute carrier family 35	TMHs		scaffold_63	-	118022	119256													286.595	265.584	336.239	0.485	0.852355	0.62	1.07911	0.342	0.789867			IPR004853	Protein of unknown function DUF250	HMMPfam	PF03151	TPT	1	184,	321,	4.4e-29
103282	103110	sodium/potassiumtransporting ATPase subunit	TMHs		scaffold_31	+	187812	193499													49.276	70.252	16.627	0.0303	2.96361	0.0484	0.701418	0.0108	4.22518	3736	ATP binding	IPR001757	ATPase, P-type, K/Mg/Cd/Cu/Zn/Na/Ca/Na/H-transporter	FPrintScan	PR00119	CATATPASE	6	275,439,651,673,776,800,	289,453,662,683,795,812,	7.4e-36,7.4e-36,7.4e-36,7.4e-36,7.4e-36,7.4e-36	3.6.3.9	Sodium/potassium-echanging ATPase.	ATP + H(2)O + Na(+)(In) + K(+)(Out) = ADP + phosphate + Na(+)(Out) + K(+)(In).	Magnesium.	\N	\N	\N
97509	97337	SNARE protein syntaxin18	TMHs		scaffold_1	+	186721	188119													25.243	18.81	10.417	0.0368	2.42325	0.0613	1.342	0.0792	1.8057	3727	protein binding	IPR010989	t-SNARE	superfamily	SSF47661	t-snare proteins	1	109,	355,	1e-07
91920	91748	SNARE protein			scaffold_98	-	49919	50906													75.762	29.335	39.683	0.256	1.90918	0.0163	2.58265	0.592	0.739233	9321	integral to membrane	IPR001388	Synaptobrevin	BlastProDom	PD001229	Q757A4_ASHGO_Q757A4;	1	158,	191,	9e-07
69355	69183	Small nuclear ribonucleoprotein			scaffold_41	+	42843	43443	1	0.48383	1	0.34534	1	0.11576	1	0.51328	2	2.4328	0	0	140.095	243.049	145.257	0.936	0.964463	0.0789	0.576406	0.255	1.67323	9367	mRNA metabolic process	IPR001163	Like-Sm ribonucleoprotein, core	HMMPfam	PF01423	LSM	1	18,	85,	1.1e-13
35835	35663	Small nuclear ribonucleoprotein			scaffold_69	-	12803	13673													197.123	207.85	159.592	0.429	1.23517	0.766	0.948391	0.394	1.30238	9367	mRNA metabolic process	IPR006649	Like-Sm ribonucleoprotein, eukaryotic and archaea-type, core	BlastProDom	PD020287	Q980S8_SULSO_Q980S8;	1	9,	50,	0.01
29475	29303	SIR2 family histone deacetylase		Lg IVS	scaffold_35	+	80688	85578													66.207	103.465	20.497	0.128	3.23008	0.139	0.639898	0.0554	5.04781	2176	DNA binding	IPR003000	NAD-dependent histone deacetylase, silent information regulator Sir2	HMMPfam	PF02146	SIR2	1	44,	225,	1.1e-88	3.5.1.-	In linear amides.	\N	\N	Nicotinate and nicotinamide metabolism	Metabolism of Cofactors and Vitamins	METABOLIC
124384	124212	single-stranded DNA-binding protein			scaffold_3	-	234795	237186													94.406	90.165	31.586	0.0207	2.98886	0.798	1.04704	0.0235	2.85459	2175	nucleic acid binding	IPR004365	Nucleic acid binding, OB-fold, tRNA/helicase-type	HMMPfam	PF01336	tRNA_anti	1	193,	275,	5.5e-08
25520	25348	Signalosome subunit			scaffold_122	+	12680	14232													40.707	39.21	30.213	0.205	1.34733	0.823	1.03818	0.292	1.29779			IPR000717	Proteasome component region PCI	HMMPfam	PF01399	PCI	1	258,	380,	5.8e-08
29649	29477	Short-chain dehydrogenase/reductase SDR			scaffold_40	-	16445	17565													203.237	416.779	38.784	0.263	5.24023	0.0108	0.487637	0.128	10.7462	5830	metabolic process	IPR002347	Glucose/ribitol dehydrogenase	FPrintScan	PR00081	GDHRDH	5	27,103,176,197,231,	44,114,195,214,251,	4e-30,4e-30,4e-30,4e-30,4e-30	1.1.1.100	3-oxoacyl-[acyl-carrier protein] reductase.	(3R)-3-hydroxyacyl-[acyl-carrier protein] + NADP(+) = 3-oxoacyl- [acyl-carrier protein] + NADPH.	\N	Fatty acid biosynthesis (path 1)	Lipid Metabolism	METABOLIC
105953	105781	Short-chain dehydrogenase			scaffold_62	+	3587	4918													43.345	32.611	36.069	0.803	1.20172	0.201	1.32915	0.897	0.904128	5830	metabolic process	IPR002198	Short-chain dehydrogenase/reductase SDR	FPrintScan	PR00080	SDRFAMILY	3	99,155,175,	110,163,194,	1.7e-07,1.7e-07,1.7e-07	1.1.1.100	3-oxoacyl-[acyl-carrier protein] reductase.	(3R)-3-hydroxyacyl-[acyl-carrier protein] + NADP(+) = 3-oxoacyl- [acyl-carrier protein] + NADPH.	\N	Fatty acid biosynthesis (path 1)	Lipid Metabolism	METABOLIC	1.5091	1.5091
101037	100865	Short-chain dehydrogenase			scaffold_15	-	215218	216335													99.426	124.208	60.88	0.117	1.63315	0.423	0.80048	0.0767	2.04021	5830	metabolic process	IPR002198	Short-chain dehydrogenase/reductase SDR	FPrintScan	PR00080	SDRFAMILY	3	79,138,158,	90,146,177,	1.2e-06,1.2e-06,1.2e-06	1.-.-.-	Oxidoreductases.	\N	\N	\N	\N	\N
110050	109878	short chain dehydrogenase			scaffold_145	-	28103	29480													509.873	999.766	19.596	0.00955	26.0192	0.474	0.509992	0.0251	51.0189	5830	metabolic process	IPR002347	Glucose/ribitol dehydrogenase	FPrintScan	PR00081	GDHRDH	4	29,103,203,225,	46,114,222,242,	1.2e-07,1.2e-07,1.2e-07,1.2e-07	1.1.1.-	With NAD(+) or NADP(+) as acceptor.	\N	\N	Bile acid biosynthesis	Lipid Metabolism	METABOLIC
59707	59535	serine/threonine-protein kinase			scaffold_22	+	143123	144179													16.586	23.816	5.084	0.0225	3.26239	0.186	0.696423	0.00967	4.6845	3043	protein kinase activity	IPR000719	Protein kinase, core	BlastProDom	PD000001	Q75DQ1_ASHGO_Q75DQ1;	1	6,	266,	1e-86	2.7.1.-	Phosphotransferases with an alcohol group as acceptor.	\N	\N	Sphingoglycolipid metabolism	Metabolism of Complex Lipids	METABOLIC
90194	90022	serine/threonine-protein kinase			scaffold_67	-	52519	54646													29.281	26.517	10.471	0.0224	2.79639	0.549	1.10424	0.0289	2.53242	3043	protein kinase activity	IPR000719	Protein kinase, core	BlastProDom	PD000001	Q90Y37_BRARE_Q90Y37;	1	67,	375,	6e-37
446676	446504	Serine/threonine protein phosphatase			scaffold_74	+	3019	4713													38.398	37.639	26.246	0.108	1.463	0.883	1.02017	0.141	1.43409	9985	hydrolase activity	IPR006186	Serine/threonine-specific protein phosphatase and bis(5-nucleosyl)-tetraphosphatase	BlastProDom	PD000252	Q9UIC9_HUMAN_Q9UIC9;	1	73,	104,	5e-09	3.1.3.16	Serine/threonine specific protein phosphatase.	A phosphoprotein + H(2)O = a protein + phosphate.	\N	\N	\N	\N
102406	102234	serine/threonine protein kinase			scaffold_24	-	181843	184395													143.19	163.493	47.987	0.0728	2.98393	0.733	0.875817	0.0608	3.40703	3043	protein kinase activity	IPR000719	Protein kinase, core	BlastProDom	PD000001	RCK1_YEAST_P38622;	1	10,	313,	5e-72	2.7.1.-	Phosphotransferases with an alcohol group as acceptor.	\N	\N	Sphingoglycolipid metabolism	Metabolism of Complex Lipids	METABOLIC
402914	402742	serine/threonine protein kinase			scaffold_502	+	1	1669													4.382	5.51	10.555	0.0724	0.415159	0.133	0.795281	0.118	0.522027	3043	protein kinase activity	IPR000719	Protein kinase, core	BlastProDom	PD000001	Q7F0I3_EEEEE_Q7F0I3;	1	48,	119,	9e-05
21884	21712	Serine/threonine protein kinase			scaffold_10	+	70774	71687													12.876	29.118	2.062	0.0175	6.24442	0.0479	0.442201	0.0102	14.1212	3043	protein kinase activity	IPR000719	Protein kinase, core	BlastProDom	PD000001	Q9HFT9_CRYNE_Q9HFT9;	1	1,	241,	2e-84
94338	94166	Serine/threonin protein phosphatase			scaffold_155	-	47815	50130													229.874	249.394	91.423	0.0336	2.5144	0.578	0.92173	0.0293	2.72791	9985	hydrolase activity	IPR006186	Serine/threonine-specific protein phosphatase and bis(5-nucleosyl)-tetraphosphatase	BlastProDom	PD000252	Q6FUI4_EEEEE_Q6FUI4;	1	251,	281,	1e-10	3.1.3.16	Serine/threonine specific protein phosphatase.	A phosphoprotein + H(2)O = a protein + phosphate.	\N	\N	\N	\N
87462	87290	Serine-type endopeptidase	SS		scaffold_34	+	20724	22534	0	0	0	0	1	0.020933	0	0	2	0.38733	2	0.35585	1239.95	921.42	1640.85	0.282	0.755675	0.0486	1.34569	0.075	0.561551	2700	subtilase activity	IPR000209	Peptidase S8 and S53, subtilisin, kexin, sedolisin	FPrintScan	PR00723	SUBTILISIN	3	176,213,384,	195,226,400,	2.3e-20,2.3e-20,2.3e-20	3.4.21.48	Cerevisin.	Hydrolysis of proteins with broad specificity, and of BZ-Arg-OET > Ac-Tyr-OET. Does not hydrolyse peptide amides.	\N	\N	\N	\N
128299	128127	Serine protease inhibitor		Lg IVS	scaffold_75	-	70609	73878													13.199	12.686	5.872	0.273	2.24779	0.865	1.04044	0.261	2.16042
24870	24698	septin family protein P-loop GTPase			scaffold_86	+	59514	61671													16.709	11.713	11.539	0.167	1.44805	0.0627	1.42653	0.956	1.01508	3737	GTP binding	IPR000038	Cell division/GTP binding protein	BlastProDom	PD002565	Q75E29_ASHGO_Q75E29;	1	289,	329,	0.0004
75963	75791	Septin and tuftelin-interacting protein			scaffold_134	+	43920	47140													99.556	104.216	31.728	0.0304	3.1378	0.705	0.955285	0.0249	3.28467	2175	nucleic acid binding	IPR000467	D111/G-patch	HMMPfam	PF01585	G-patch	1	289,	333,	6.9e-16
19643	19471	Sec24-related			scaffold_83	-	93887	97412													34.271	40.501	25.326	0.203	1.35319	0.235	0.846177	0.0812	1.59919	3727	protein binding	IPR007123	Gelsolin region	HMMPfam	PF00626	Gelsolin	1	712,	769,	6e-07
120113	119941	SDR (likely)			scaffold_110	+	23165	24020													5.122	2.934	2.487	0.0298	2.05951	0.0739	1.74574	0.629	1.17973	5830	metabolic process	IPR002198	Short-chain dehydrogenase/reductase SDR	FPrintScan	PR00080	SDRFAMILY	3	85,136,158,	96,144,177,	8.6e-08,8.6e-08,8.6e-08	1.1.1.100	3-oxoacyl-[acyl-carrier protein] reductase.	(3R)-3-hydroxyacyl-[acyl-carrier protein] + NADP(+) = 3-oxoacyl- [acyl-carrier protein] + NADPH.	\N	Fatty acid biosynthesis (path 1)	Lipid Metabolism	METABOLIC
119278	119106	SDR (Adh type)	SS likely		scaffold_84	-	90766	91907													142.726	66.563	27.971	0.0698	5.10264	0.0114	2.14422	0.201	2.37971	5830	metabolic process	IPR002198	Short-chain dehydrogenase/reductase SDR	FPrintScan	PR00080	SDRFAMILY	2	75,149,	86,168,	1.4e-05,1.4e-05	1.-.-.-	Oxidoreductases.	\N	\N	\N	\N	\N
505274	505102	Salicylate hydroxylase	SS	FAD	scaffold_302	-	18149	19915													108.45	123.055	6.133	0.0157	17.683	0.474	0.881313	0.0112	20.0644	5830	metabolic process	IPR003042	Aromatic-ring hydroxylase	FPrintScan	PR00420	RNGMNOXGNASE	5	9,173,327,342,379,	31,188,342,358,395,	3.6e-21,3.6e-21,3.6e-21,3.6e-21,3.6e-21	1.14.13.1	Salicylate 1-monooxygenase.	Salicylate + NADH + O(2) = catechol + NAD(+) + H(2)O + CO(2).	FAD.	Fluorene degradation	Biodegradation of Xenobiotics	METABOLIC
91313	91141	Salicylate hydroxylase	TMH		scaffold_86	-	19383	21262													21.745	33.627	6.519	0.0192	3.33563	0.0756	0.646653	0.00258	5.15831	2888	monooxygenase activity	IPR003042	Aromatic-ring hydroxylase	FPrintScan	PR00420	RNGMNOXGNASE	5	8,156,305,320,357,	30,171,320,336,373,	5e-17,5e-17,5e-17,5e-17,5e-17	1.14.13.1	Salicylate 1-monooxygenase.	Salicylate + NADH + O(2) = catechol + NAD(+) + H(2)O + CO(2).	FAD.	Fluorene degradation	Biodegradation of Xenobiotics	METABOLIC
112557	112385	Salicylate 1-monooxygenase			scaffold_263	+	24663	26333													62.401	13.785	7.393	0.0759	8.44055	0.0883	4.52673	0.05	1.8646	5830	metabolic process	IPR003042	Aromatic-ring hydroxylase	FPrintScan	PR00420	RNGMNOXGNASE	4	7,165,318,333,	29,180,333,349,	3e-19,3e-19,3e-19,3e-19	1.14.13.1	Salicylate 1-monooxygenase.	Salicylate + NADH + O(2) = catechol + NAD(+) + H(2)O + CO(2).	FAD.	Fluorene degradation	Biodegradation of Xenobiotics	METABOLIC
20281	20109	RTA1-like protein	TMHs, stress respons.Toxin binding		scaffold_155	-	30752	32273													316.582	2384.71	30.059	0.0692	10.532	0.17	0.132755	0.0338	79.3344	5053	response to stress	IPR007568	RTA1 like protein	HMMPfam	PF04479	RTA1	1	67,	296,	1.9e-37
98989	98817	RNA-dependent RNA polymerase			scaffold_5	+	257329	261638													21.856	22.521	7.309	0.0346	2.99029	0.868	0.970472	0.0295	3.08127			IPR007855	RNA-dependent RNA polymerase, eukaryotic-type	HMMPfam	PF05183	RdRP	1	577,	967,	1.9e-147
22491	22319	RNA-binding protein 42			scaffold_18	+	128541	129361													105.065	153.948	114.052	0.765	0.921203	0.0857	0.682471	0.278	1.34981	2175	nucleic acid binding	IPR000504	RNA recognition motif, RNP-1	HMMPfam	PF00076	RRM_1	1	114,	184,	8.7e-17
37406	37234	RNA-binding protein			scaffold_160	+	6927	10135	5	0.47836	7	1.0068	7	1.6755	2	0.11337	0	0	1	0.1035	21.871	18.404	14.046	0.112	1.5571	0.212	1.18838	0.274	1.31027	2175	nucleic acid binding	IPR000504	RNA recognition motif, RNP-1	HMMPfam	PF00076	RRM_1	1	625,	673,	4.8e-06	5.2.1.8	Peptidylprolyl isomerase.	Peptidylproline (omega=180) = peptidylproline (omega=0).	\N	\N	\N	\N
19620	19448	RNA-binding protein			scaffold_81	-	43259	44510	4	3.1574	4	1.6742	3	0.40147	3	17.55	3	11.476	4	13.421	966.529	1146.35	1437.64	0.42	0.672301	0.285	0.84314	0.645	0.797378	2175	nucleic acid binding	IPR000504	RNA recognition motif, RNP-1	HMMPfam	PF00076	RRM_1	1	5,	76,	4.4e-30								2.9269	2.9269
76820	76648	RNA polymerase, lg subunit			scaffold_153	+	56264	62284													120.24	121.869	52.458	0.0725	2.29212	0.943	0.986633	0.0611	2.32317	2176	DNA binding	IPR000722	RNA polymerase, alpha subunit	HMMPfam	PF00623	RNA_pol_Rpb1_2	1	348,	512,	5.2e-112	2.7.7.6	DNA-directed RNA polymerase.	N nucleoside triphosphate = N diphosphate + {RNA}(N).	\N	RNA polymerase	TRANSCRIPTION	REGULATORY
87101	86929	RNA polymerase III			scaffold_31	+	101320	103503													18.584	22.671	12.768	0.153	1.45551	0.2	0.819726	0.0544	1.77561	2176	DNA binding	IPR008806	RNA polymerase III Rpc82, C -terminal	HMMPfam	PF05645	RNA_pol_Rpc82	1	140,	428,	3.3e-13	2.7.7.6	DNA-directed RNA polymerase.	N nucleoside triphosphate = N diphosphate + {RNA}(N).	\N	RNA polymerase	TRANSCRIPTION	REGULATORY
65577	65405	RNA polymerase II			scaffold_16	+	22164	23576													89.448	62.256	48.874	0.178	1.83018	0.0937	1.43678	0.537	1.27381			IPR006670	Cyclin	HMMSmart	SM00385	no description	1	47,	142,	7.2e-10
74927	74755	RNA polymerase			scaffold_115	+	17619	18868													8.375	2.806	4.074	0.194	2.05572	0.00813	2.98468	0.498	0.688758	2176	DNA binding	IPR011262	DNA-directed RNA polymerase, insert	HMMPfam	PF01000	RNA_pol_A_bac	1	96,	227,	7.7e-32	2.7.7.6	DNA-directed RNA polymerase.	N nucleoside triphosphate = N diphosphate + {RNA}(N).	\N	RNA polymerase	TRANSCRIPTION	REGULATORY
85026	84854	RNA polymerase			scaffold_16	-	159901	165290													38.478	46.416	11.961	0.0228	3.21696	0.218	0.828981	0.0152	3.88061	2176	DNA binding	IPR000722	RNA polymerase, alpha subunit	HMMPfam	PF00623	RNA_pol_Rpb1_2	1	351,	518,	2.3e-111	2.7.7.6	DNA-directed RNA polymerase.	N nucleoside triphosphate = N diphosphate + {RNA}(N).	\N	RNA polymerase	TRANSCRIPTION	REGULATORY
31204	31032	RNA polymerase			scaffold_115	-	38223	44193													14.357	19.669	3.822	0.0389	3.75641	0.245	0.72993	0.0276	5.14626	162	nucleotide binding	IPR007855	RNA-dependent RNA polymerase, eukaryotic-type	HMMPfam	PF05183	RdRP	1	169,	541,	2.6e-61
29142	28970	RNA polymerase			scaffold_27	-	162081	165756													48.577	95.362	13.843	0.0371	3.50914	0.113	0.509396	0.0153	6.88882			IPR007855	RNA-dependent RNA polymerase, eukaryotic-type	HMMPfam	PF05183	RdRP	1	531,	921,	3.9e-91
104778	104606	RNA binding protein			scaffold_46	+	62951	64345													21.958	22.187	17.441	0.57	1.25899	0.96	0.989679	0.551	1.27212	2175	nucleic acid binding	IPR000504	RNA recognition motif, RNP-1	HMMPfam	PF00076	RRM_1	1	57,	128,	2.2e-19
247864	247692	RING-5 domain containing			scaffold_19	-	2852	5250													45.513	51.858	51.023	0.583	0.892009	0.37	0.877647	0.947	1.01637	3727	protein binding	IPR002867	Zinc finger, C6HC-type	HMMPfam	PF01485	IBR	1	202,	271,	9.9e-07
102247	102075	Ribosome biogenesis protein NOP53			scaffold_23	+	204737	206556													50.778	58.913	39.801	0.436	1.2758	0.298	0.861915	0.243	1.48019			IPR011687	P60-like	HMMPfam	PF07767	Nop53	1	41,	430,	4.1e-49
31390	31218	Ribosomal proteins			scaffold_127	-	16702	17562													457.519	495.095	442.3	0.911	1.03441	0.721	0.924103	0.749	1.11936	2227	structural constituent of ribosome	IPR001196	Ribosomal protein L15	HMMPfam	PF00256	L15	1	109,	141,	3.2e-13								1.5277	1.5277
18694	18522	Ribosomal protein S8			scaffold_25	+	112126	113349													653.593	854.24	644.753	0.977	1.01371	0.202	0.765116	0.548	1.32491	2227	structural constituent of ribosome	IPR000630	Ribosomal protein S8	BlastProDom	PD001098	Q9UUP9_PHARH_Q9UUP9;	1	11,	130,	2e-57								3.2434	4.2166
94342	94170	Ribosomal protein S17			scaffold_155	-	50444	51327													533.702	546.448	465.379	0.777	1.14681	0.914	0.976675	0.758	1.1742	2227	structural constituent of ribosome	IPR000266	Ribosomal protein S17	BlastProDom	PD001295	Q6C0Z7_EEEEE_Q6C0Z7;	1	68,	136,	2e-30								3.8488	3.0687
21243	21071	Ribosomal protein S13			scaffold_3	+	58088	58620													102.83	54.213	81.399	0.454	1.26328	0.0371	1.89678	0.294	0.666016	2216	RNA binding	IPR001892	Ribosomal protein S13	BlastProDom	PD001363	Q6FPA1_EEEEE_Q6FPA1;	1	117,	156,	9e-07
12186	12014	Ribosomal protein S11			scaffold_30	+	87513	88263													157.278	69.571	119.196	0.387	1.31949	0.0108	2.26068	0.14	0.583669	2227	structural constituent of ribosome	IPR001971	Ribosomal protein S11	BlastProDom	PD001010	RS14_PODCA_Q08699;	1	28,	98,	2e-32								0.70345	1.9017
27413	27241	Ribosomal protein L9			scaffold_1	-	602586	603643													450.611	446.377	434.392	0.928	1.03734	0.966	1.00949	0.951	1.02759	2227	structural constituent of ribosome	IPR000702	Ribosomal protein L6	HMMPfam	PF00347	Ribosomal_L6	2	12,99,	87,178,	2.3e-17,2.3e-09								2.2057	4.7398
19930	19758	Ribosomal protein L7			scaffold_111	+	24488	25948													374.505	233.558	281.276	0.388	1.33145	0.0381	1.60348	0.609	0.830352	2227	structural constituent of ribosome	IPR004038	Ribosomal protein L7Ae/L30e/S12e/Gadd45	BlastProDom	PD004495	RL7A_THEAC_Q9HJ56;	1	135,	190,	6e-08								1.5944	2.2066
84900	84728	Ribosomal protein L6			scaffold_15	+	234699	235852													500.158	372.655	425.969	0.641	1.17417	0.109	1.34215	0.714	0.874841	2227	structural constituent of ribosome	IPR000915	Ribosomal protein L6E	BlastProDom	PD009612	RL6_MESCR_P34091;	1	84,	227,	1e-33								3.2646	4.4307
101071	100899	Ribosomal protein L36			scaffold_15	+	242386	243039													582.257	267.148	462.367	0.452	1.2593	0.0278	2.17953	0.159	0.577783	2227	structural constituent of ribosome	IPR000509	Ribosomal protein L36e	BlastProDom	PD009192	Q755I6_ASHGO_Q755I6;	1	3,	55,	4e-12								0.67388	2.625
17966	17794	Ribosomal protein L32			scaffold_5	+	158593	159523													679.215	838.073	665.836	0.964	1.02009	0.333	0.810448	0.598	1.25868	2227	structural constituent of ribosome	IPR001515	Ribosomal protein L32e	BlastProDom	PD003823	R32B_SCHPO_O42935;	1	4,	118,	1e-44								1.8286	3.2874
20442	20270	Ribosomal protein L31			scaffold_187	+	17133	17950													598.401	537.458	560.824	0.853	1.067	0.604	1.11339	0.92	0.958336	2227	structural constituent of ribosome	IPR000054	Ribosomal protein L31e	BlastProDom	PD006030	Q9XFT6_EEEEE_Q9XFT6;	1	40,	90,	5e-14
110144	109972	Ribosomal protein L28			scaffold_147	+	48789	49882													282.398	292.036	290.365	0.953	0.972562	0.876	0.966997	0.99	1.00575	2227	structural constituent of ribosome	IPR002672	Ribosomal protein L28e	HMMPfam	PF01778	Ribosomal_L28e	1	2,	134,	1.8e-25								1.7104	1.7104
505077	504905	Ribosomal protein L24			scaffold_30	-	67993	69248													388.368	515.404	402.111	0.929	0.965823	0.218	0.753522	0.54	1.28175	2227	structural constituent of ribosome	IPR000988	Ribosomal protein L24e	HMMPfam	PF01246	Ribosomal_L24e	1	41,	110,	8.6e-40
101793	101621	Ribosomal protein L22			scaffold_20	+	220466	221648													344.356	220.221	285.071	0.639	1.20797	0.0485	1.56368	0.547	0.772513	2227	structural constituent of ribosome	IPR001063	Ribosomal protein L22/L17	BlastProDom	PD001032	RL17_NEUCR_Q9HE25;	1	86,	156,	2e-20
17955	17783	Ribosomal protein L15			scaffold_5	+	113126	114237													622.985	606.041	602.865	0.932	1.03337	0.888	1.02796	0.99	1.00527	2227	structural constituent of ribosome	IPR000439	Ribosomal protein L15e	HMMPfam	PF00827	Ribosomal_L15e	1	2,	190,	1.9e-126								0.69011	1.1972
21774	21602	Ribosomal protein 60S			scaffold_9	-	53459	54248													219.654	86.523	169.855	0.266	1.29319	0.00452	2.53868	0.0599	0.509393	2227	structural constituent of ribosome	IPR001380	Ribosomal protein L13e	BlastProDom	PD004443	RL13_CANAL_O59931;	1	54,	107,	2e-15								0.68614	2.2397
89298	89126	Ribosomal protein 60S	111 aa		scaffold_54	-	127801	128530													265.421	112.953	209.672	0.426	1.26589	0.0246	2.34984	0.121	0.538713	2227	structural constituent of ribosome	IPR001813	Ribosomal protein 60S	HMMPfam	PF00428	Ribosomal_60s	1	21,	109,	5.3e-34
83049	82877	Ribosomal protein 40S			scaffold_6	-	303750	304464													724.613	347.336	688.302	0.833	1.05275	0.0143	2.0862	0.0696	0.504627	2227	structural constituent of ribosome	IPR000892	Ribosomal protein S26e	HMMPfam	PF01283	Ribosomal_S26e	1	1,	113,	4.8e-78
98245	98073	Ribosomal protein 40S			scaffold_2	+	478602	478978													726.964	396.847	563.181	0.244	1.29082	0.0246	1.83185	0.236	0.704653	2227	structural constituent of ribosome	IPR000289	Ribosomal protein S28e	BlastProDom	PD005541	RS28_SCHPO_Q10421;	1	4,	50,	1e-16
107363	107191	Ribosomal protein			scaffold_85	-	22274	23756	5	0.83254	0	0	3	0.12234	1	0.12036	0	0	0	0	452.687	391.452	338.35	0.423	1.33793	0.379	1.15643	0.707	1.15694	2227	structural constituent of ribosome	IPR002136	Ribosomal protein L4/L1e	HMMPfam	PF00573	Ribosomal_L4	1	18,	261,	1.1e-138								1.5216	3.3251
34298	34126	Ribosomal protein			scaffold_22	-	154760	155307													606.048	916.766	955.952	0.239	0.633973	0.0742	0.661072	0.923	0.959008	2227	structural constituent of ribosome	IPR001813	Ribosomal protein 60S	HMMPfam	PF00428	Ribosomal_60s	1	17,	111,	2.8e-35								1.196	3.8222
131440	131268	Ribosomal protein			scaffold_359	+	912	1748													661.282	533.086	550.654	0.503	1.2009	0.195	1.24048	0.921	0.968096	2227	structural constituent of ribosome	IPR000911	Ribosomal protein L11	BlastProDom	PD001367	RL11_ARCFU_O29712;	1	19,	66,	0.003
17938	17766	Ribose-phosphate pyrophosphokinase			scaffold_5	+	17129	18687													129.347	118.4	57.036	0.0299	2.26781	0.509	1.09246	0.0376	2.07588	6724	nucleoside metabolic process	IPR000836	Phosphoribosyltransferase	HMMPfam	PF00156	Pribosyltran	1	142,	272,	1.6e-27	2.7.6.1	Ribose-phosphate pyrophosphokinase.	ATP + D-ribose 5-phosphate = AMP + 5-phospho-alpha-D-ribose 1-diphosphate.	\N	Purine metabolism	Nucleotide Metabolism	METABOLIC
59967	59795	Ribonucleoprotein			scaffold_76	+	34461	36285													10.378	5.958	8.55	0.595	1.2138	0.0178	1.74186	0.323	0.696842	2175	nucleic acid binding	IPR002344	Lupus La protein	FPrintScan	PR00302	LUPUSLA	3	26,59,126,	41,72,144,	7.2e-13,7.2e-13,7.2e-13
64537	64365	Ribonuclease T2	SS		scaffold_11	+	45186	46898	4	0.6432	3	0.25462	4	0.15389	3	0.37844	4	1.062	4	0.97572	79.897	32.482	17.608	0.0146	4.53754	0.00896	2.45973	0.107	1.84473	2216	RNA binding	IPR001568	Ribonuclease T2	HMMPfam	PF00445	Ribonuclease_T2	1	55,	258,	5.3e-65	3.1.27.1	Ribonuclease T2.	Two-stage endonucleolytic cleavage to 3'-phosphomononucleotides and 3'-phosphooligonucleotides with 2',3'-cyclic phosphate intermediates.	\N	\N	\N	\N	0.68924	2.3147
125937	125765	Ribonuclease T2	SS		scaffold_21	+	74120	75273													22.767	9.734	6.947	0.0116	3.27724	0.00355	2.33892	0.229	1.40118	2216	RNA binding	IPR001568	Ribonuclease T2	HMMPfam	PF00445	Ribonuclease_T2	1	57,	288,	3.4e-17	3.1.27.1	Ribonuclease T2.	Two-stage endonucleolytic cleavage to 3'-phosphomononucleotides and 3'-phosphooligonucleotides with 2',3'-cyclic phosphate intermediates.	\N	\N	\N	\N	1.0716	0.72674
107853	107681	Ribonuclease H2			scaffold_95	+	32811	33958													11.2	8.218	3.582	0.0216	3.12674	0.266	1.36286	0.0738	2.29425	2216	RNA binding	IPR001352	Ribonuclease HII/HIII	HMMPfam	PF01351	RNase_HII	1	37,	262,	7.6e-41	3.1.26.4	Ribonuclease H.	Endonucleolytic cleavage to 5'-phosphomonoester.	\N	\N	\N	\N
28231	28059	Riboflavin synthase alpha chain			scaffold_11	+	85215	86145													267.458	204.295	172.342	0.283	1.5519	0.0861	1.30918	0.671	1.1854	3112	riboflavin synthase activity	IPR001783	Lumazine-binding protein	BlastProDom	PD004110	Q7SD50_NEUCR_Q7SD50;	2	8,106,	96,203,	3e-15,1e-19	2.5.1.9	Riboflavin synthase.	2 6,7-dimethyl-8-(1-D-ribityl)lumazine = riboflavin + 4-(1-D- ribitylamino)-5-amino-2,6-dihydroxypyrimidine.	Flavoprotein.	Riboflavin metabolism	Metabolism of Cofactors and Vitamins	METABOLIC
123206	123034	Rhodanese domain protein			scaffold_298	+	44	343													0.752	1.857	1.188	NaN	0.632997	NaN	0.404954	NaN	1.56313			IPR001763	Rhodanese-like	ProfileScan	PS50206	RHODANESE_3	1	11,	84,	10.479
27253	27081	Rho GDP-Dissociation Inhibitor			scaffold_1	-	5507	6637													346.375	353.213	364.908	0.8	0.949212	0.9	0.980641	0.898	0.967951	3430	Rho GDP-dissociation inhibitor activity	IPR000406	RHO protein GDP dissociation inhibitor	HMMPfam	PF02115	Rho_GDI	1	1,	200,	9.5e-29								0.52828	1.3356
115553	115381	RFX family transcription factor			scaffold_16	+	248731	251742													126.913	50.507	38.262	0.183	3.31695	0.00406	2.51278	0.739	1.32003	2176	DNA binding	IPR003150	DNA-binding RFX	HMMPfam	PF02257	RFX_DNA_binding	1	203,	283,	2.1e-17
60578	60406	Reverse Transcriptase			scaffold_447	-	541	777													------	------	------	NaN	#VALUE!	NaN	#VALUE!	NaN	#VALUE!
415183	415011	replication factor C1			scaffold_58	+	128646	132777													25.608	24.676	8.933	0.0212	2.86667	0.833	1.03777	0.0149	2.76234	3827	intracellular	IPR003959	AAA ATPase, core	HMMPfam	PF00004	AAA	1	414,	451,	6.9e-08	6.5.1.2	DNA ligase (NAD+).	NAD(+) + {deoxyribonucleotide}(N) + {deoxyribonucleotide}(M) = AMP + nicotinamide nucleotide + {deoxyribonucleotide}(N+M).	\N	\N	\N	\N
98165	97993	related to KEL-1			scaffold_2	-	377079	382333													57.845	59.992	29.3	0.089	1.97423	0.804	0.964212	0.0747	2.04751	9964	transferase activity, transferring alkyl or aryl (other than methyl) groups	IPR006652	Kelch repeat type 1	HMMPfam	PF01344	Kelch_1	1	371,	417,	4.3e-07
28602	28430	RAS-like protein	IVS		scaffold_17	-	40790	42882													291.082	393.751	581.584	0.119	0.500499	0.0674	0.739254	0.312	0.677032	3737	GTP binding	IPR001806	Ras GTPase	FPrintScan	PR00449	RASTRNSFRMNG	5	11,34,51,114,149,	32,50,73,127,171,	1.8e-40,1.8e-40,1.8e-40,1.8e-40,1.8e-40
112017	111845	RAS small GTPase			scaffold_224	+	24476	25481													33.183	13.007	32.597	0.936	1.01798	0.00241	2.55116	0.027	0.399024	3737	GTP binding	IPR001806	Ras GTPase	FPrintScan	PR00449	RASTRNSFRMNG	5	21,44,61,123,170,	42,60,83,136,192,	2e-33,2e-33,2e-33,2e-33,2e-33
69664	69492	Ras GTPase-activating-like protein			scaffold_44	+	22028	27385													133.61	182.99	59.546	0.0394	2.24381	0.0536	0.730149	0.0148	3.07309	3435	Ras GTPase activator activity	IPR000593	RasGAP protein, C-terminal	BlastProDom	PD008735	RNG2_SCHPO_O14188;	1	1314,	1529,	7e-41
68011	67839	RAB-protein geranylgeranyltransferase			scaffold_31	+	12266	13570													30.442	48.287	25.177	0.452	1.20912	0.0432	0.630439	0.0629	1.9179	5986	protein prenyltransferase activity	IPR002088	Protein prenyltransferase, alpha subunit	HMMPfam	PF01239	PPTA	5	46,93,141,178,221,	74,123,171,206,251,	0.00024,1.6e-09,7.5e-09,6.1e-06,9.8e-06
109810	109638	rab guanyl-nucleotide exchange factor			scaffold_139	-	31503	35394													22.663	21.941	13.289	0.078	1.7054	0.866	1.03291	0.0788	1.65106	3419	small GTPase regulator activity	IPR001180	Citron-like	HMMPfam	PF00780	CNH	1	263,	295,	0.0013
17781	17609	Pyruvate kinase			scaffold_2	+	217596	220132													113.854	87.218	92.934	0.577	1.22511	0.094	1.3054	0.869	0.938494	281	magnesium ion binding	IPR015793	Pyruvate kinase, barrel	BlastProDom	PD001009	KPYK_AGABI_O94122;	2	30,202,	197,377,	6e-09,4e-86	2.7.1.40	Pyruvate kinase.	ATP + pyruvate = ADP + phosphoenolpyruvate.	\N	Purine metabolism	Nucleotide Metabolism	METABOLIC	1.8649	2.5755
129030	128858	Pyruvate Carboxylase			scaffold_105	+	61782	66291													149.114	97.173	37.423	0.034	3.98455	0.0631	1.53452	0.0544	2.59661	2290	catalytic activity	IPR005481	Carbamoyl phosphate synthase, large subunit, N-terminal	HMMPfam	PF00289	CPSase_L_chain	1	42,	155,	6.2e-43	6.4.1.1	Pyruvate carboxylase.	ATP + pyruvate + HCO(3)(-) = ADP + phosphate + oxaloacetate.	Biotin; Manganese or Zinc.	Alanine and aspartate metabolism	Amino Acid Metabolism	METABOLIC	0.80263	2.5848
68395	68223	Pyridoxin biosynthesis protein			scaffold_33	-	50285	51908													25.879	7.704	11.429	0.0828	2.26433	0.00519	3.35916	0.369	0.674075	2290	catalytic activity	IPR001852	Vitamin B6 biosynthesis protein	BlastProDom	PD004958	Q6QND3_TOBAC_Q6QND3;	1	44,	103,	1e-20	4.-.-.-	Lyases.	\N	\N	\N	\N	\N	0.42813	0.5612
16268	16096	Pyranosone dehydratase			scaffold_196	+	37205	40444													2.73	2.502	2.098	0.429	1.30124	0.596	1.09113	0.623	1.19256	2290	catalytic activity	IPR004838	Aminotransferases, class-I, pyridoxal-phosphate-binding site	ScanRegExp	PS00105	AA_TRANSFER_CLASS_1	1	382,	395,	NA
130521	130349	Pyranose 2-oxidase (POX)			scaffold_196	-	33353	36026	0	0	0	0	0	0	0	0	4	0.62334	0	0	17.746	22.35	12.654	0.185	1.4024	0.155	0.794004	0.0669	1.76624	4174	glucose metabolic process	IPR012814	Pyranose oxidase	HMMTigr	TIGR02462	pyranose_ox: pyranose oxidase	1	13,	606,	1.7e-170
99302	99130	Purine-cytosine permease	TMHs		scaffold_7	+	124291	126219													15.882	14.968	181.181	0.000433	0.0876582	0.688	1.06106	0.000264	0.0826135	8565	nucleobase transmembrane transporter activity	IPR001248	Permease for cytosine/purines, uracil, thiamine, allantoin	HMMPfam	PF02133	Transp_cyt_pur	1	16,	170,	1.1e-09
67615	67443	Purine Nucleoside permase		lg IVS	scaffold_28	-	69961	74191	4	0.79573	1	0.077979	1	0.026139	4	1.0252	6	3.8461	7	6.3811	10.184	14.441	7.23	0.225	1.40858	0.117	0.705214	0.0692	1.99737			IPR009486	Purine nucleoside permease	HMMPfam	PF06516	NUP	1	29,	349,	3.5e-120
120818	120646	protoporphyrinogen oxidase			scaffold_135	-	37	1231													5.864	1.482	4.785	0.626	1.2255	0.00124	3.95682	0.0397	0.309718	4283	electron transport	IPR002937	Amine oxidase	HMMPfam	PF01593	Amino_oxidase	2	14,241,	236,329,	5.8e-12,1.2e-05	1.3.3.4	Protoporphyrinogen oxidase.	Protoporphyrinogen-IX + O(2) = protoporphyrin-IX + H(2)O(2).	FAD.	Porphyrin and chlorophyll metabolism	Metabolism of Cofactors and Vitamins	METABOLIC
423121	422949	Proteophosphoglycan 5			scaffold_61	+	82249	87057													29.435	20.68	19.472	0.323	1.51166	0.123	1.42336	0.898	1.06204	2745	glucan 1,4-alpha-glucosidase activity										3.2.1.3	Glucan 1,4-alpha-glucosidase.	Hydrolysis of terminal 1,4-linked alpha-D-glucose residues successively from non-reducing ends of the chains with release of beta-D-glucose.	\N	Starch and sucrose metabolism	Metabolism of Complex Carbohydrates	METABOLIC
14132	13960	Proteophosphoglycan 5			scaffold_84	-	82	1668													1.065	0.461	0.711	0.295	1.49789	0.0511	2.3102	0.279	0.648383
451369	451197	Proteophosphoglycan			scaffold_77	+	51725	56505													56.152	56.248	29.283	0.0452	1.91756	0.993	0.998293	0.0463	1.92084	3827	intracellular	IPR000198	RhoGAP	HMMPfam	PF00620	RhoGAP	1	668,	864,	3.8e-33	3.2.1.3	Glucan 1,4-alpha-glucosidase.	Hydrolysis of terminal 1,4-linked alpha-D-glucose residues successively from non-reducing ends of the chains with release of beta-D-glucose.	\N	Starch and sucrose metabolism	Metabolism of Complex Carbohydrates	METABOLIC
27629	27457	Proteophosoglycan			scaffold_3	+	278599	281038													362.577	366.191	51.75	0.0776	7.00632	0.96	0.990131	0.0625	7.07615	2196	transcription factor activity	IPR001138	Fungal transcriptional regulatory protein, N-terminal	FPrintScan	PR00054	FUNGALZNCYS	4	183,190,198,210,	189,196,208,221,	0.12,0.12,0.12,0.12
17364	17192	Proteophosoglycan			scaffold_353	+	31	1490													------	------	------	NaN	#VALUE!	NaN	#VALUE!	NaN	#VALUE!
170427	170255	Proteophosoglycan			scaffold_118	-	77788	78599													4.266	7.016	8.596	0.287	0.496277	0.172	0.608039	0.78	0.816194
125233	125061	Protein spt2	SS		scaffold_11	-	177072	178980													37.808	51.438	28.447	0.24	1.32907	0.177	0.735021	0.0846	1.8082			IPR013256	Chromatin SPT2	HMMPfam	PF08243	SPT2	1	395,	493,	1.5e-11
498659	498487	Protein phosphatase			scaffold_2	+	185364	187157													63.175	83.153	33.561	0.049	1.88239	0.068	0.759744	0.0199	2.47767	3088	protein serine/threonine phosphatase activity	IPR014045	Protein phosphatase 2C, N-terminal	HMMPfam	PF00481	PP2C	1	71,	359,	1.1e-23	3.1.3.16	Serine/threonine specific protein phosphatase.	A phosphoprotein + H(2)O = a protein + phosphate.	\N	\N	\N	\N
79281	79109	Protein MON2 homolog			scaffold_238	-	20734	26552													15.81	14.618	8.283	0.0829	1.90873	0.755	1.08154	0.127	1.76482	3546	transporter activity	IPR002345	Lipocalin	ScanRegExp	PS00213	LIPOCALIN	1	1397,	1410,	NA
111313	111141	protein kinase			scaffold_190	-	24241	25782													55.381	50.567	40.094	0.252	1.38128	0.533	1.0952	0.38	1.26121	3225	serine-type endopeptidase inhibitor activity	IPR000719	Protein kinase, core	BlastProDom	PD000001	Q9HFW0_EEEEE_Q9HFW0;	1	27,	284,	4e-102
17578	17406	protein kinase			scaffold_458	+	892	2167													------	------	------	NaN	#VALUE!	NaN	#VALUE!	NaN	#VALUE!	3043	protein kinase activity	IPR000719	Protein kinase, core	BlastProDom	PD000001	Q6FK01_EEEEE_Q6FK01;	1	77,	272,	5e-29	2.7.1.37	Protein kinase.	ATP + a protein = ADP + a phosphoprotein.	\N	\N	\N	\N
42786	42614	Protein kinase			scaffold_100	+	39746	40648													7.464	10.235	2.162	0.0122	3.45236	0.0973	0.729262	0.00367	4.73404	3043	protein kinase activity	IPR000719	Protein kinase, core	BlastProDom	PD000001	Q7S031_NEUCR_Q7S031;	1	18,	269,	3e-56	2.7.1.-	Phosphotransferases with an alcohol group as acceptor.	\N	\N	Sphingoglycolipid metabolism	Metabolism of Complex Lipids	METABOLIC
123747	123575	protein kinase			scaffold_434	+	3613	4192													------	------	------	NaN	#VALUE!	NaN	#VALUE!	NaN	#VALUE!	3043	protein kinase activity	IPR000719	Protein kinase, core	BlastProDom	PD000001	Q7SCY3_NEUCR_Q7SCY3;	1	5,	101,	7e-17
18441	18269	protein kinase			scaffold_16	+	135940	139146													110.898	102.227	34.316	0.0294	3.23167	0.583	1.08482	0.0338	2.97899	3043	protein kinase activity	IPR000719	Protein kinase, core	BlastProDom	PD000001	Q871H9_NEUCR_Q871H9;	1	41,	288,	4e-88
103036	102864	Protein Kinase			scaffold_29	+	103747	106250													59.454	61.089	34.815	0.067	1.70771	0.839	0.973236	0.0575	1.75467	3043	protein kinase activity	IPR000719	Protein kinase, core	BlastProDom	PD000001	Q23915_DICDI_Q23915;	1	20,	262,	6e-48
79304	79132	Protein kinase			scaffold_240	+	21497	22551													4.998	11.875	10.171	0.332	0.491397	0.00383	0.420884	0.834	1.16754	3043	protein kinase activity	IPR000719	Protein kinase, core	BlastProDom	PD000001	Q75DQ1_ASHGO_Q75DQ1;	1	50,	311,	4e-79
95390	95218	Protein disulfide isomerase	SS		scaffold_198	-	16114	18088	1	0.08292	1	0.059185	2	0.040841	0	0	0	0	0	0	324.282	281.885	214.749	0.217	1.51005	0.469	1.15041	0.376	1.31263	10048	isomerase activity	IPR006662	Thioredoxin-related	FPrintScan	PR00421	THIOREDOXIN	3	42,50,91,	50,59,102,	5e-07,5e-07,5e-07	5.3.4.1	Protein disulfide isomerase.	Rearrangement of both intrachain and interchain disulfide bonds in proteins to form the native structures.	\N	\N	\N	\N	1.0956	1.9485
125017	124845	Proteasome activator complex			scaffold_9	+	169417	178003													85.957	116.373	20.685	0.0408	4.15552	0.099	0.738634	0.0204	5.62596	3708	binding	IPR000357	HEAT	HMMPfam	PF02985	HEAT	2	730,1841,	767,1877,	0.62,0.0013
95848	95676	Prostatic acid phosphatase	TMHs		scaffold_220	-	37087	39363	0	0	2	0.13973	2	0.072633	0	0	0	0	0	0	45.366	41.892	39.614	0.558	1.1452	0.635	1.08293	0.81	1.0575	2441	acid phosphatase activity	IPR000560	Histidine acid phosphatase	HMMPfam	PF00328	Acid_phosphat_A	1	5,	322,	3.2e-08	3.1.3.2	Acid phosphatase.	An orthophosphoric monoester + H(2)O = an alcohol + phosphate.	\N	gamma-Hexachlorocyclohexane degradation	Biodegradation of Xenobiotics	METABOLIC
116492	116320	proline-rich protein			scaffold_28	-	128555	128919													0.846	1.1	2.158	0.172	0.39203	NaN	0.769091	NaN	0.509731
10935	10763	Profilin (probable)		Actin binding	scaffold_10	-	159667	160220													298.102	263.497	334.04	0.617	0.892414	0.552	1.13133	0.439	0.788819	2246	actin binding	IPR002097	Profilin/allergen	FPrintScan	PR00392	PROFILIN	6	3,18,36,60,95,108,	12,27,56,74,108,125,	1.6e-16,1.6e-16,1.6e-16,1.6e-16,1.6e-16,1.6e-16
82676	82504	priA	SS	May be developmentally regulated	scaffold_5	+	85599	87085													360.298	175.282	729.715	0.0369	0.493752	0.00759	2.05553	0.00788	0.240206
87961	87789	Prephenate dehydrogenase			scaffold_38	+	79644	81563													69.315	70.824	26.533	0.0341	2.61241	0.912	0.978694	0.022	2.66928	3038	prephenate dehydrogenase (NADP+) activity	IPR003099	Prephenate dehydrogenase	HMMPfam	PF02153	PDH	1	27,	294,	1.5e-05	1.3.1.13	Prephenate dehydrogenase (NADP+).	Prephenate + NADP(+) = 4-hydroxyphenylpyruvate + CO(2) + NADPH.	\N	Phenylalanine, tyrosine and tryptophan biosynthesis	Amino Acid Metabolism	METABOLIC
492220	492048	predicted protein			scaffold_121	+	68956	70839													0.406	0.57	0.226	0.52	1.79646	0.144	0.712281	0.308	2.52212	9710	oxidoreductase activity	IPR003042	Aromatic-ring hydroxylase	FPrintScan	PR00420	RNGMNOXGNASE	4	5,167,343,380,	27,182,359,396,	9.3e-14,9.3e-14,9.3e-14,9.3e-14	1.14.13.1	Salicylate 1-monooxygenase.	Salicylate + NADH + O(2) = catechol + NAD(+) + H(2)O + CO(2).	FAD.	Fluorene degradation	Biodegradation of Xenobiotics	METABOLIC
76379	76207	pre-mRNA splicing factor			scaffold_143	-	4842	6097													95.697	110.012	72.555	0.216	1.31896	0.332	0.869878	0.109	1.51626	2175	nucleic acid binding	IPR000504	RNA recognition motif, RNP-1	HMMSmart	SM00360	no description	1	148,	220,	8e-05
108346	108174	PQ-loop repeat containin protein 1	TMHs		scaffold_105	+	27172	28239													51.706	62.859	34.599	0.123	1.49444	0.215	0.822571	0.0494	1.81679			IPR006603	Cystinosin/ERS1p repeat	HMMPfam	PF04193	PQ-loop	2	4,122,	56,188,	0.00026,2.5e-05
229890	229718	Polyketide synthesis			scaffold_169	+	48042	51715													0.813	0.359	0.408	0.324	1.99265	0.0982	2.26462	0.846	0.879902	2290	catalytic activity	IPR000873	AMP-dependent synthetase and ligase	HMMPfam	PF00501	AMP-binding	1	37,	466,	3.4e-61
36754	36582	Polyketide synthase		IVSs	scaffold_115	-	26514	33839													188.695	123.624	12.134	0.046	15.5509	0.253	1.52636	0.0523	10.1882	6667	biosynthetic process	IPR014030	Beta-ketoacyl synthase, N-terminal	HMMPfam	PF00109	ketoacyl-synt	1	391,	595,	1.4e-74
131344	131172	Plasma membrane ATPase	TMHs		scaffold_319	-	1756	5730	3	0.17488	1	0.029856	4	0.041842	6	0.2867	4	0.37551	3	0.25494	416.022	272.316	632.708	0.198	0.657526	0.245	1.52772	0.0856	0.430398	3736	ATP binding	IPR001757	ATPase, P-type, K/Mg/Cd/Cu/Zn/Na/Ca/Na/H-transporter	FPrintScan	PR00119	CATATPASE	6	236,387,543,565,647,670,	250,401,554,575,666,682,	8.5e-39,8.5e-39,8.5e-39,8.5e-39,8.5e-39,8.5e-39	3.6.3.6	Proton-exporting ATPase.	ATP + H(2)O + H(+)(In) = ADP + phosphate + H(+)(Out).	Magnesium.	Oxidative phosphorylation	Energy Metabolism	METABOLIC	1.0706	2.0232
62904	62732	PL8			scaffold_5	+	136080	139046													40.649	39.858	43.352	0.952	0.93765	0.921	1.01985	0.937	0.919404	3782	extracellular region	IPR003159	Polysaccharide lyase family 8, central	HMMPfam	PF02278	Lyase_8	1	426,	560,	2.6e-18
105783	105611	PL14			scaffold_59	+	96526	98330													449.782	240.988	207.68	0.0657	2.16575	0.00388	1.86641	0.629	1.16038
167133	166961	PL14			scaffold_115	+	84419	85847													9.942	9.867	5.964	0.091	1.667	0.96	1.0076	0.0889	1.65443
28377	28205	PL14			scaffold_13	+	42348	43856													63.833	66.698	148.744	0.057	0.429147	0.723	0.957045	0.0546	0.448408
105781	105609	PL14			scaffold_59	+	94874	96105													5.345	5.897	1.209	0.0585	4.42101	0.649	0.906393	0.0373	4.87758
71204	71032	PL14			scaffold_59	-	49906	51310													3.114	4.294	1.535	0.0643	2.02866	0.499	0.725198	0.105	2.79739
86716	86544	Pirin-like protein			scaffold_28	+	44713	46620													71.026	72.243	15.252	0.0242	4.65683	0.928	0.983154	0.0235	4.73662			IPR003829	Pirin, N-terminal	HMMPfam	PF02678	Pirin	1	22,	121,	1.7e-43
11042	10870	Phytase	SS		scaffold_11	-	255423	256978													0.175	0.222	------	NaN	#VALUE!	NaN	0.788288	NaN	#VALUE!	2441	acid phosphatase activity	IPR000560	Histidine acid phosphatase	HMMPfam	PF00328	Acid_phosphat_A	1	52,	381,	4e-48	3.1.3.2	Acid phosphatase.	An orthophosphoric monoester + H(2)O = an alcohol + phosphate.	\N	gamma-Hexachlorocyclohexane degradation	Biodegradation of Xenobiotics	METABOLIC
61451	61279	Phosphoribosylformimino-5-aminoimidazole carboxamide ribotide isomerase			scaffold_1	-	162380	163544													52.879	66.235	15.764	0.044	3.35442	0.484	0.798354	0.0312	4.20166	110	histidine biosynthetic process	IPR006062	Histidine biosynthesis	HMMPfam	PF00977	His_biosynth	1	12,	248,	3.4e-15	5.3.1.16	N-(5'-phospho-D-ribosylformimino)-5-amino-1-(5''-phosphoribosyl)-4- imidazole carboxamide isomerase.	N-(5'-phospho-D-ribosylformimino)-5-amino-1-(5''-phosphoribosyl)-4- imidazolecarboxamide = N-(5'-phospho-D-1'-ribulosylformimino)-5- amino-1-(5''-phosphoribosyl)-4-imidazolecarboxamide.	\N	Histidine metabolism	Amino Acid Metabolism	METABOLIC
129861	129689	Phosphopyruvate hydratase			scaffold_147	+	12187	14055	6	0.69843	0	0	4	0.10382	1	0.10381	0	0	0	0	254.981	189.251	653.517	0.303	0.390167	0.0823	1.34732	0.185	0.289588	29	phosphopyruvate hydratase complex	IPR000941	Enolase	BlastProDom	PD000902	ENO_NEOFR_P42894;	1	149,	428,	2e-115	4.2.1.11	Phosphopyruvate hydratase.	2-phospho-D-glycerate = phosphoenolpyruvate + H(2)O.	Magnesium.	Phenylalanine, tyrosine and tryptophan biosynthesis	Amino Acid Metabolism	METABOLIC	3.0688	3.6507
184234	184062	Phosphomevalonate kinase			scaffold_13	+	37666	40170													7.83	4.224	6.73	0.75	1.16345	0.0927	1.85369	0.386	0.627637	3736	ATP binding	IPR006204	GHMP kinase	HMMPfam	PF00288	GHMP_kinases_N	1	155,	240,	0.002	2.7.4.2	Phosphomevalonate kinase.	ATP + (R)-5-phosphomevalonate = ADP + (R)-5-diphosphomevalonate.	\N	Sterol biosynthesis	Lipid Metabolism	METABOLIC
87395	87223	Phospholipid/glycerol acyltransferase	TMH		scaffold_33	+	115797	117522													127.371	48.81	42.119	0.397	3.02407	0.00953	2.60953	0.917	1.15886	2196	transcription factor activity	IPR000818	TEA/ATTS	HMMSmart	SM00426	no description	1	54,	121,	7.9e-07
75750	75578	Phospholipase			scaffold_130	-	22152	25547													112.411	76.242	29.782	0.0268	3.77446	0.0907	1.4744	0.0539	2.56	2290	catalytic activity	IPR001736	Phospholipase D/Transphosphatidylase	HMMPfam	PF00614	PLDc	2	153,595,	180,622,	2.4e-09,4.3e-07	3.1.4.4	Phospholipase D.	A phosphatidylcholine + H(2)O = choline + a phosphatidate.	\N	Phospholipid degradation	Metabolism of Complex Lipids	METABOLIC	0.18795	0.31728
96737	96565	Phospholipase			scaffold_286	-	6621	12224													104.342	136.97	26.6	0.0288	3.92263	0.187	0.761787	0.0124	5.14925	3727	protein binding	IPR001849	Pleckstrin-like	HMMPfam	PF00169	PH	1	250,	405,	8e-09	3.1.4.4	Phospholipase D.	A phosphatidylcholine + H(2)O = choline + a phosphatidate.	\N	Phospholipid degradation	Metabolism of Complex Lipids	METABOLIC
91200	91028	Phosphoglycerate mutase			scaffold_84	-	20107	20646	1	0.41599	1	1.1781	2	0.3949	1	0.4413	0	0	0	0	191.267	189.618	632.138	0.0625	0.302572	0.993	1.0087	0.141	0.299963																			3.69	9.1568
110745	110573	Phosphoglycerate kinase			scaffold_168	+	37194	39026	3	0.33829	0	0	1	0.025078	0	0	0	0	0	0	112.085	84.835	396.154	0.259	0.282933	0.0875	1.32121	0.172	0.214147	2992	phosphoglycerate kinase activity	IPR001576	Phosphoglycerate kinase	FPrintScan	PR00477	PHGLYCKINASE	9	13,34,113,156,185,208,332,368,391,	29,56,128,178,207,227,357,379,408,	4.3e-104,4.3e-104,4.3e-104,4.3e-104,4.3e-104,4.3e-104,4.3e-104,4.3e-104,4.3e-104	2.7.2.3	Phosphoglycerate kinase.	ATP + 3-phospho-D-glycerate = ADP + 3-phospho-D-glyceroyl phosphate.	\N	Carbon fixation	Energy Metabolism	METABOLIC	3.48	2.3669
101589	101417	Phosphoesterase			scaffold_19	-	126838	129788													34.043	29.971	23.414	0.123	1.45396	0.325	1.13586	0.258	1.28005	9985	hydrolase activity	IPR006179	5'-Nucleotidase and apyrase	FPrintScan	PR01607	APYRASEFAMLY	4	188,223,406,491,	205,246,429,510,	2.5e-11,2.5e-11,2.5e-11,2.5e-11	3.1.3.5	5'-nucleotidase.	A 5'-ribonucleotide + H(2)O = a ribonucleoside + phosphate.	\N	Purine metabolism	Nucleotide Metabolism	METABOLIC
19616	19444	Phosphoenolpyruvate carboxykinase	SS		scaffold_81	-	1	2419													374.721	286.322	906.099	0.0408	0.413554	0.159	1.30874	0.0115	0.315994	2986	phosphoenolpyruvate carboxykinase (ATP) activity	IPR008210	Phosphoenolpyruvate carboxykinase, N-terminal	BlastProDom	PD004738	Q6FRR0_EEEEE_Q6FRR0;	1	39,	241,	1e-79	4.1.1.49	Phosphoenolpyruvate carboxykinase (ATP).	ATP + oxaloacetate = ADP + phosphoenolpyruvate + CO(2).	\N	Carbon fixation	Energy Metabolism	METABOLIC	1.3026	2.148
29609	29437	Phosphatidylinositol kinase			scaffold_38	-	170941	177342													42.615	68.612	21.013	0.0404	2.02803	0.0124	0.621101	0.00903	3.26522	9971	phosphotransferase activity, alcohol group as acceptor	IPR000403	Phosphatidylinositol 3- and 4-kinase, catalytic	HMMPfam	PF00454	PI3_PI4_kinase	1	1378,	1586,	1.1e-65	2.7.1.67	1-phosphatidylinositol 4-kinase.	ATP + 1-phosphatidyl-1D-myo-inositol = ADP + 1-phosphatidyl-1D-myo- inositol 4-phosphate.	\N	Inositol phosphate metabolism	Metabolism of Complex Lipids	METABOLIC
81361	81189	Phosphatidate phosphatase	IVS		scaffold_1	-	198504	201800													39.809	32.522	9.727	0.0186	4.09263	0.194	1.22406	0.0285	3.34348			IPR007651	Lipin, N-terminal conserved region	HMMPfam	PF04571	Lipin_N	1	1,	128,	1.4e-44
115110	114938	Phosphate transporter	TMHs		scaffold_12	-	147540	150858													30.348	31.615	20.421	0.189	1.48612	0.802	0.959924	0.143	1.54816	8501	citrate transmembrane transporter activity	IPR004331	SPX, N-terminal	HMMPfam	PF03105	SPX	1	1,	308,	2.6e-36
123575	123403	phosphate carrier protein			scaffold_368	+	4602	5821													------	------	------	NaN	#VALUE!	NaN	#VALUE!	NaN	#VALUE!
112902	112730	Phosphatase activator			scaffold_298	+	2189	3476													14.559	10.108	16.94	0.507	0.859445	0.129	1.44034	0.113	0.596694	3727	protein binding	IPR011333	BTB/POZ fold	superfamily	SSF54695	POZ domain	1	23,	158,	1.8e-07
83830	83658	Phenylalanine ammonia lyase			scaffold_10	+	19555	22348													174.769	84.64	52.669	0.363	3.31825	0.0263	2.06485	0.72	1.60702	6667	biosynthetic process	IPR001106	Phenylalanine/histidine ammonia-lyase	HMMPfam	PF00221	PAL	1	64,	578,	2.1e-193	4.3.1.5	Phenylalanine ammonia-lyase.	L-phenylalanine = trans-cinnamate + NH(3).	\N	Phenylalanine metabolism	Amino Acid Metabolism	METABOLIC
352407	352235	Phenylalanine ammonia lyase			scaffold_340	-	8819	12179													5.728	3.668	2.837	0.0552	2.01903	0.0469	1.56161	0.396	1.29292	6667	biosynthetic process	IPR001106	Phenylalanine/histidine ammonia-lyase	HMMPfam	PF00221	PAL	1	60,	574,	7e-189	4.3.1.5	Phenylalanine ammonia-lyase.	L-phenylalanine = trans-cinnamate + NH(3).	\N	Phenylalanine metabolism	Amino Acid Metabolism	METABOLIC
19500	19328	Peroxisomal protein			scaffold_70	-	120781	121988													57.087	41.724	57.81	0.961	0.987494	0.0958	1.36821	0.181	0.721744			IPR014467	Peroxisomal membrane protein 4	HMMPIR	PIRSF013674	Peroxisomal membrane protein 4	1	1,	206,	2.6e-102
120356	120184	Peroxisomal multifunctional beta-oxidation protein	AKL		scaffold_118	+	17599	21772													108.735	87.901	40.577	0.052	2.67972	0.662	1.23702	0.197	2.16628	5830	metabolic process	IPR002198	Short-chain dehydrogenase/reductase SDR	FPrintScan	PR00080	SDRFAMILY	3	109,162,482,	120,170,501,	2.9e-11,2.9e-11,2.9e-11								0.5277	0.74046
96143	95971	Peroxisomal multifunctional beta-oxidation protein	SRL	Peroxisomal dehydratase	scaffold_237	-	4473	5823													92.193	62.024	73.887	0.596	1.24776	0.088	1.48641	0.684	0.839444
104340	104168	Peroxisomal assembly per8			scaffold_41	-	43564	44791													30.298	48.025	25.668	0.511	1.18038	0.0298	0.63088	0.0591	1.87101	3727	protein binding	IPR001841	Zinc finger, RING-type	HMMPfam	PF00097	zf-C3HC4	1	268,	305,	6.8e-05
30562	30390	Peroxisomal acyl-CoA oxidase	AKL	fatty acid beta oxidation	scaffold_76	-	48423	51127													29.536	38.675	19.965	0.475	1.47939	0.28	0.763697	0.282	1.93714	2445	acyl-CoA oxidase activity	IPR006090	Acyl-CoA oxidase/dehydrogenase, type 1	HMMPfam	PF00441	Acyl-CoA_dh_1	1	285,	446,	0.0025	1.3.3.6	Acyl-CoA oxidase.	Acyl-CoA + O(2) = trans-2,3-dehydroacyl-CoA + H(2)O(2).	FAD.	Fatty acid metabolism	Lipid Metabolism	METABOLIC
95791	95619	Peroxiredoxins			scaffold_218	-	13240	14105	1	0.26455	1	0.18883	3	0.22758	0	0	0	0	0	0	97.902	25.561	107.833	0.773	0.907904	0.000607	3.83013	0.0228	0.237042	9710	oxidoreductase activity	IPR013740	Redoxin	HMMPfam	PF08534	Redoxin	1	5,	173,	9.9e-54								1.3548	1.3548
95139	94967	Peroxiredoxins			scaffold_186	-	16013	17046	1	0.20043	2	0.30638	2	0.1027	0	0	0	0	0	0	78.403	47.282	618.436	0.12	0.126776	0.0368	1.6582	0.0655	0.0764542	9493	antioxidant activity	IPR000866	Alkyl hydroperoxide reductase/ Thiol specific antioxidant/ Mal allergen	HMMPfam	PF00578	AhpC-TSA	1	5,	139,	9.7e-52								1.8838	0.30314
66123	65951	Peroxidase MnP-like non-functional?	SS	Extended C-term. Model 115595 better.	scaffold_19	+	134076	136574													5.023	6.435	2.756	0.275	1.82257	0.275	0.780575	0.122	2.33491	2976	peroxidase activity	IPR002016	Haem peroxidase, plant/fungal/bacterial	FPrintScan	PR00458	PEROXIDASE	4	60,122,141,186,	74,139,153,201,	7.1e-12,7.1e-12,7.1e-12,7.1e-12
66145	65973	Peroxidase MnP fragment	SS	Truncated model	scaffold_19	+	158271	159085													5.237	2.152	2.746	0.32	1.90714	0.0228	2.43355	0.701	0.783685	2976	peroxidase activity	IPR002016	Haem peroxidase, plant/fungal/bacterial	FPrintScan	PR00458	PEROXIDASE	3	61,123,142,	75,140,154,	2e-08,2e-08,2e-08
117840	117668	Peroxidase MnP (long)			scaffold_51	-	21953	23377													0.167	0.472	0.571	0.198	0.292469	0.177	0.353814	0.581	0.82662	2976	peroxidase activity	IPR002016	Haem peroxidase, plant/fungal/bacterial	FPrintScan	PR00458	PEROXIDASE	5	61,123,142,188,213,	75,140,154,203,228,	2.5e-14,2.5e-14,2.5e-14,2.5e-14,2.5e-14	1.11.1.11	L-ascorbate peroxidase.	L-ascorbate + H(2)O(2) = dehydroascorbate + 2 H(2)O.	\N	Ascorbate and aldarate metabolism	Carbohydrate Metabolism	METABOLIC
115763	115591	Peroxidase MnP		replaces protein 65970	scaffold_19	+	121002	122568													24.708	19.491	14.662	0.177	1.68517	0.462	1.26766	0.493	1.32935	2976	peroxidase activity	IPR002016	Haem peroxidase, plant/fungal/bacterial	FPrintScan	PR00458	PEROXIDASE	5	58,121,140,186,211,	72,138,152,201,226,	3.5e-15,3.5e-15,3.5e-15,3.5e-15,3.5e-15	1.11.1.11	L-ascorbate peroxidase.	L-ascorbate + H(2)O(2) = dehydroascorbate + 2 H(2)O.	\N	Ascorbate and aldarate metabolism	Carbohydrate Metabolism	METABOLIC
75744	75572	Peroxidase MnP		replaces protein 75606	scaffold_130	+	56359	57886													1.217	1.166	0.64	0.14	1.90156	0.864	1.04374	0.183	1.82187	2976	peroxidase activity	IPR002016	Haem peroxidase, plant/fungal/bacterial	FPrintScan	PR00458	PEROXIDASE	5	60,122,141,187,212,	74,139,153,202,227,	7.1e-16,7.1e-16,7.1e-16,7.1e-16,7.1e-16	1.11.1.11	L-ascorbate peroxidase.	L-ascorbate + H(2)O(2) = dehydroascorbate + 2 H(2)O.	\N	Ascorbate and aldarate metabolism	Carbohydrate Metabolism	METABOLIC
75738	75566	Peroxidase MnP		replaces protein 75606	scaffold_130	+	59510	60990													5.839	6.504	1.484	0.108	3.93464	0.61	0.897755	0.0844	4.38275	2976	peroxidase activity	IPR002016	Haem peroxidase, plant/fungal/bacterial	FPrintScan	PR00458	PEROXIDASE	5	60,122,141,187,212,	74,139,153,202,227,	7.1e-16,7.1e-16,7.1e-16,7.1e-16,7.1e-16	1.11.1.11	L-ascorbate peroxidase.	L-ascorbate + H(2)O(2) = dehydroascorbate + 2 H(2)O.	\N	Ascorbate and aldarate metabolism	Carbohydrate Metabolism	METABOLIC
115764	115592	Peroxidase MnP		replaces protein 65970	scaffold_19	+	124421	125900													4.187	4.965	26.055	0.134	0.160699	0.504	0.843303	0.138	0.190558	2976	peroxidase activity	IPR002016	Haem peroxidase, plant/fungal/bacterial	FPrintScan	PR00458	PEROXIDASE	5	58,121,140,186,211,	72,138,152,201,226,	3.5e-15,3.5e-15,3.5e-15,3.5e-15,3.5e-15	1.11.1.11	L-ascorbate peroxidase.	L-ascorbate + H(2)O(2) = dehydroascorbate + 2 H(2)O.	\N	Ascorbate and aldarate metabolism	Carbohydrate Metabolism	METABOLIC
30544	30372	Peroxidase LiP			scaffold_75	-	63305	64958													6.182	4.875	1.41	0.0543	4.3844	0.379	1.2681	0.0704	3.45745	2976	peroxidase activity	IPR002016	Haem peroxidase, plant/fungal/bacterial	FPrintScan	PR00458	PEROXIDASE	5	63,128,147,193,218,	77,145,159,208,233,	6.6e-13,6.6e-13,6.6e-13,6.6e-13,6.6e-13	1.11.1.11	L-ascorbate peroxidase.	L-ascorbate + H(2)O(2) = dehydroascorbate + 2 H(2)O.	\N	Ascorbate and aldarate metabolism	Carbohydrate Metabolism	METABOLIC
121834	121662	Peroxidase LiP			scaffold_183	-	30704	32226													9.537	5.153	1.772	0.0936	5.38205	0.171	1.85077	0.161	2.90801	2976	peroxidase activity	IPR002016	Haem peroxidase, plant/fungal/bacterial	FPrintScan	PR00458	PEROXIDASE	5	62,127,146,192,217,	76,144,158,207,232,	1.6e-12,1.6e-12,1.6e-12,1.6e-12,1.6e-12
150703	150531	Peroxidase LiP			scaffold_106	+	1192	3606													10.342	13.605	3.204	0.148	3.22784	0.17	0.760162	0.0852	4.24625	2976	peroxidase activity	IPR002016	Haem peroxidase, plant/fungal/bacterial	FPrintScan	PR00458	PEROXIDASE	5	62,127,146,192,217,	76,144,158,207,232,	1.8e-13,1.8e-13,1.8e-13,1.8e-13,1.8e-13
19706	19534	Peroxidase HTP CPO			scaffold_89	+	28262	29759													17.674	14.288	21.109	0.536	0.837273	0.67	1.23698	0.507	0.676868	2976	peroxidase activity	IPR000028	Chloroperoxidase	BlastProDom	PD040763	Q8H6Y2_PHYIN_Q8H6Y2;	1	35,	143,	3e-11
104600	104428	Peroxidase HTP CPO			scaffold_44	+	34819	35802													22.76	29.436	18.356	0.642	1.23992	0.632	0.773203	0.346	1.60362	2976	peroxidase activity	IPR000028	Chloroperoxidase	BlastProDom	PD040763	Q870W6_NEUCR_Q870W6;	1	19,	114,	1e-12
18373	18201	Peroxidase HTP			scaffold_14	-	86829	88143													62.71	60.051	32.136	0.0361	1.95139	0.839	1.04428	0.0739	1.86865	2976	peroxidase activity	IPR000028	Chloroperoxidase	BlastProDom	PD040763	Q9HGX3_AGABI_Q9HGX3;	1	74,	263,	4e-53
131907	131735	Peroxidase HTP			scaffold_1	-	17750	19588													9.017	14.984	4.62	0.107	1.95173	0.113	0.601775	0.0321	3.24329	2976	peroxidase activity	IPR000028	Chloroperoxidase	BlastProDom	PD040763	Q8TFD4_MYCPJ_Q8TFD4;	1	91,	250,	6e-12
32681	32509	Peroxidase GP		No Asp179, Trp171,lu35	scaffold_332	+	13195	14926													33.919	43.899	18.622	0.103	1.82145	0.181	0.77266	0.0415	2.35737	2976	peroxidase activity	IPR002016	Haem peroxidase, plant/fungal/bacterial	FPrintScan	PR00458	PEROXIDASE	5	56,122,141,186,211,	70,139,153,201,226,	2.5e-14,2.5e-14,2.5e-14,2.5e-14,2.5e-14	1.11.1.11	L-ascorbate peroxidase.	L-ascorbate + H(2)O(2) = dehydroascorbate + 2 H(2)O.	\N	Ascorbate and aldarate metabolism	Carbohydrate Metabolism	METABOLIC
122296	122124	Peroxidase DyP	SS	replaces protein 78526	scaffold_214	+	6790	8398	13	31.803	14	34.461	14	30.097	13	17.757	3	0.67837	6	2.6728	43.585	57.182	8.241	0.0361	5.288	0.522	0.76248	0.0399	6.938			IPR006314	Dyp-type peroxidase	HMMTigr	TIGR01413	Dyp_perox_fam: Dyp-type peroxidase fami	1	11,	436,	1.1e-71								6.0069	8.1654
125853	125681	Peroxidase DyP			scaffold_19	-	223772	225676													7.698	5.453	12.78	0.226	0.602347	0.161	1.4117	0.0626	0.426682			IPR006314	Dyp-type peroxidase	HMMTigr	TIGR01413	Dyp_perox_fam: Dyp-type peroxidase fami	1	47,	524,	1.8e-25
71832	71660	Peroxidase DyP			scaffold_67	+	41602	43719													11.173	8.745	4.793	0.0612	2.33111	0.136	1.27764	0.118	1.82454			IPR006314	Dyp-type peroxidase	HMMTigr	TIGR01413	Dyp_perox_fam: Dyp-type peroxidase fami	1	58,	598,	1.3e-29
85467	85295	Peroxidase DyP			scaffold_19	-	169824	171940													39.027	145.379	11.353	0.0499	3.43759	0.0151	0.26845	0.000565	12.8053			IPR006314	Dyp-type peroxidase	HMMTigr	TIGR01413	Dyp_perox_fam: Dyp-type peroxidase fami	1	60,	519,	1e-25
128103	127931	Peroxidase Cytochrome c peroxidase			scaffold_69	+	52753	54494	3	0.35776	1	0.078813	7	0.23428	0	0	0	0	0	0	62.352	57.515	215.789	0.2	0.288949	0.735	1.0841	0.171	0.266534	2976	peroxidase activity	IPR002016	Haem peroxidase, plant/fungal/bacterial	FPrintScan	PR00458	PEROXIDASE	5	129,188,206,253,277,	143,205,218,268,292,	2e-17,2e-17,2e-17,2e-17,2e-17	1.11.1.5	Cytochrome-c peroxidase.	2 ferrocytochrome c + H(2)O(2) = 2 ferricytochrome c + 2 H(2)O.	Heme.	\N	\N	\N	0.96563	2.3249
432337	432165	Peroxidase			scaffold_67	+	56857	57511													1.015	0.416	0.356	0.0445	2.85112	0.115	2.4399	0.786	1.16854	2976	peroxidase activity	IPR002016	Haem peroxidase, plant/fungal/bacterial	ScanRegExp	PS00436	PEROXIDASE_2	1	110,	121,	NA
24881	24709	Peptidyl-prolyl cis-trans isomerase			scaffold_87	+	497	1953	2	0.24803	1	0.084947	1	0.028475	1	0.12625	0	0	0	0	64.095	55.148	47.316	0.542	1.35462	0.404	1.16224	0.756	1.16553	4591	protein folding	IPR001179	Peptidyl-prolyl cis-trans isomerase, FKBP-type	HMMPfam	PF00254	FKBP_C	1	264,	355,	1.2e-44	5.2.1.8	Peptidylprolyl isomerase.	Peptidylproline (omega=180) = peptidylproline (omega=0).	\N	\N	\N	\N
32034	31862	peptidyl-prolyl cis-trans isomerase			scaffold_186	+	9121	9969													44.97	17.438	37.118	0.462	1.21154	0.00139	2.57885	0.0486	0.469799	2233	peptidyl-prolyl cis-trans isomerase activity	IPR002130	Peptidyl-prolyl cis-trans isomerase, cyclophilin-type	FPrintScan	PR00153	CSAPPISMRASE	5	39,68,111,126,139,	54,80,126,138,154,	5.2e-40,5.2e-40,5.2e-40,5.2e-40,5.2e-40	5.2.1.8	Peptidylprolyl isomerase.	Peptidylproline (omega=180) = peptidylproline (omega=0).	\N	\N	\N	\N
62650	62478	Peptide methionine sulfoxide reductase			scaffold_4	+	331812	332495													198.233	90.316	172.383	0.625	1.14996	0.0115	2.19488	0.0887	0.523926	9876	oxidoreductase activity, acting on sulfur group of donors, disulfide as acceptor	IPR002569	Methionine sulphoxide reductase A	BlastProDom	PD003489	MSRA_SCHPO_Q09859;	1	7,	170,	2e-53	1.8.4.6	Protein-methionine-S-oxide reductase. Peptide methionine sulfoxide reductase. Peptide Met(O) reductase.	Protein L-methionine + oxidized thioredoxin = protein L-methionine S-oxide + reduced thioredoxin.	\N	\N	\N	\N	1.1607	1.5206
131253	131081	Peptidase Ser	SS		scaffold_294	+	20366	22498	3	0.39659	0	0	0	0	2	0.19739	0	0	0	0	8.388	7.559	2.104	0.0883	3.98669	0.822	1.10967	0.129	3.59268	2623	serine carboxypeptidase activity	IPR001563	Peptidase S10, serine carboxypeptidase	BlastProDom	PD001189	CPS1_PENJA_P34946;	1	67,	476,	2e-98	3.4.16.5	Carboxypeptidase C.	Release of a C-terminal amino acid with a broad specificity.	\N	\N	\N	\N	0.4483	0.97199
10543	10371	Peptidase Ser	SS		scaffold_6	-	52652	54786	1	0.080495	4	0.32184	3	0.10789	2	0.17564	0	0	0	0	35.636	6.892	18.873	0.661	1.8882	0.0108	5.17063	0.487	0.365178	4639	proteolysis	IPR008758	Peptidase S28	HMMPfam	PF05577	Peptidase_S28	1	66,	497,	1.1e-13	3.4.16.2	Lysosomal Pro-X carboxypeptidase.	Cleavage of a Pro-|-Xaa bond to release a C-terminal amino acid.	\N	\N	\N	\N	1.7054	1.1686
35821	35649	Peptidase Ser			scaffold_68	-	82413	84328	0	0	0	0	1	0.0276	0	0	2	0.51557	2	0.47367	53.896	88.715	12.467	0.257	4.32309	0.0108	0.607518	0.141	7.11599	2700	subtilase activity	IPR000209	Peptidase S8 and S53, subtilisin, kexin, sedolisin	FPrintScan	PR00723	SUBTILISIN	3	116,152,308,	135,165,324,	1e-08,1e-08,1e-08	3.4.21.48	Cerevisin.	Hydrolysis of proteins with broad specificity, and of BZ-Arg-OET > Ac-Tyr-OET. Does not hydrolyse peptide amides.	\N	\N	\N	\N
106490	106318	Peptidase S8	SS		scaffold_69	-	113662	117487													75.634	49.941	18.727	0.00457	4.03877	0.0347	1.51447	0.0221	2.66679	2700	subtilase activity	IPR000209	Peptidase S8 and S53, subtilisin, kexin, sedolisin	FPrintScan	PR00723	SUBTILISIN	3	142,197,509,	161,210,525,	3.1e-19,3.1e-19,3.1e-19	3.4.21.-	Serine endopeptidases.	\N	\N	\N	\N	\N
25397	25225	Peptidase S53	SS		scaffold_115	-	13448	15494	0	0	2	0.12159	2	0.040757	0	0	0	0	0	0	0.045	------	------	NaN	#VALUE!	NaN	#VALUE!	NaN	#VALUE!	2700	subtilase activity	IPR015366	Peptidase S53, propeptide	HMMPfam	PF09286	Pro-kuma_activ	1	37,	179,	1.7e-46	3.4.14.9	Tripeptidyl-peptidase I.	Release of an N-terminal tripeptide from a polypeptide.	\N	\N	\N	\N
31295	31123	Peptidase S10	SS		scaffold_121	-	49973	51990													117.976	113.538	142.863	0.492	0.825798	0.786	1.03909	0.422	0.794733	2623	serine carboxypeptidase activity	IPR001563	Peptidase S10, serine carboxypeptidase	BlastProDom	PD001189	Q6CGJ3_EEEEE_Q6CGJ3;	1	103,	525,	6e-98	3.4.16.5	Carboxypeptidase C.	Release of a C-terminal amino acid with a broad specificity.	\N	\N	\N	\N	0.3766	0.054714
102565	102393	Peptidase S10	SS		scaffold_26	+	43345	45424													60.091	68.677	573.404	0.0037	0.104797	0.665	0.87498	0.0119	0.119771	2623	serine carboxypeptidase activity	IPR001563	Peptidase S10, serine carboxypeptidase	BlastProDom	PD001189	Q6CGJ3_EEEEE_Q6CGJ3;	1	87,	492,	1e-77	3.4.16.-	Serine-type carboxypeptidases.	\N	\N	\N	\N	\N
101842	101670	Peptidase M35	SS		scaffold_21	+	67300	68773	4	1.3887	3	0.53861	4	0.27732	4	0.80052	0	0	0	0	1231.97	582.793	21.675	9.59e-05	56.8383	0.146	2.11391	0.0053	26.8878	2658	metalloendopeptidase activity	IPR001384	Peptidase M35, deuterolysin	HMMPfam	PF02102	Peptidase_M35	1	1,	353,	3.6e-08
90125	89953	Peptidase M20 domain-containing protein			scaffold_66	-	57985	60512													43.487	97.741	48.679	0.706	0.893342	0.04	0.444921	0.0978	2.00787	4639	proteolysis	IPR002933	Peptidase M20	HMMPfam	PF01546	Peptidase_M20	1	171,	461,	0.0006
105223	105051	Peptidase M			scaffold_50	-	113503	117535													175.545	51.001	24.14	0.00461	7.27196	7.07e-05	3.44199	0.0645	2.11272	4639	proteolysis	IPR014782	Peptidase M1, membrane alanine aminopeptidase, N-terminal	HMMPfam	PF01433	Peptidase_M1	1	17,	437,	1.3e-130	3.4.11.-	Aminopeptidases.	\N	\N	\N	\N	\N	0.65818	1.5811
69888	69716	peptidase C14			scaffold_46	+	9131	9517													22.49	27.522	12.905	0.0966	1.74274	0.241	0.817164	0.0536	2.13266			IPR001680	WD40 repeat	BlastProDom	PD000018	Q7ND85_GLOVI_Q7ND85;	3	18,61,104,	50,94,129,	5e-05,1e-05,0.006
10767	10595	Peptidase A22-Signal peptide peptidase	TMHs		scaffold_8	-	242897	244397													61.317	27.499	61.802	0.992	0.992152	0.0223	2.22979	0.313	0.444953	9321	integral to membrane	IPR007369	Peptidase A22B, signal peptide peptidase	HMMPfam	PF04258	Peptidase_A22B	1	52,	348,	7.5e-76	3.4.99.-	Endopeptidases of unknown catalytic mechanism.	\N	\N	Type II secretion system	SORTING AND DEGRADATION	REGULATORY
125241	125069	Peptidase A1	SS		scaffold_11	-	207888	210025	4	0.60707	1	0.061922	2	0.042785	4	0.40336	0	0	0	0	330.25	295.492	2241.08	0.00752	0.147362	0.724	1.11763	0.00828	0.131853	2632	pepsin A activity	IPR001461	Peptidase A1	FPrintScan	PR00792	PEPSIN	4	208,357,407,496,	228,370,418,511,	4.8e-21,4.8e-21,4.8e-21,4.8e-21	3.4.23.25	Saccharopepsin.	Hydrolysis of proteins with broad specificity for peptide bonds. Cleaves -Leu-Leu-|-Val-Tyr- bond in a synthetic substrate. Does not act on esters of Tyr or Arg.	\N	\N	\N	\N
460607	460435	Peptidase A1			scaffold_81	+	33590	35426													8.401	1.666	41.891	0.0727	0.200544	0.00818	5.04262	0.0111	0.0397699	3740	sugar binding	IPR001461	Peptidase A1	FPrintScan	PR00792	PEPSIN	4	71,215,267,362,	91,228,278,377,	1.2e-14,1.2e-14,1.2e-14,1.2e-14	3.4.23.1	Pepsin A.	Preferential cleavage: hydrophobic, preferably aromatic, residues in P1 and P1' positions. Cleaves 1-Phe-|-Val-2, 4-Gln-|-His-5, 13-Glu-|- Ala-14, 14-Ala-|-Leu-15, 15-Leu-|-Tyr-16, 16-Tyr-|-Leu-17, 23-Gly-|- Phe-24, 24-Phe-|-Phe-25 and 25-Phe-|-Tyr-26 bon	\N	\N	\N	\N	0.081467	0.59985
69181	69009	Peptidase A1	SS		scaffold_40	-	145898	147911													228.157	220.359	239.656	0.917	0.952019	0.871	1.03539	0.862	0.91948	2632	pepsin A activity	IPR001461	Peptidase A1	FPrintScan	PR00792	PEPSIN	3	60,267,363,	80,278,378,	5.6e-07,5.6e-07,5.6e-07	3.4.23.5	Cathepsin D.	Specificity similar to, but narrower than, that of pepsin A. Does not cleave the 4-Gln-|-His-5 bond in B chain of insulin.	\N	\N	\N	\N
97717	97545	Peptidase			scaffold_1	+	469009	471422													186.438	179.405	258.19	0.147	0.722096	0.771	1.0392	0.134	0.694857	4639	proteolysis	IPR007484	Peptidase M28	HMMPfam	PF04389	Peptidase_M28	1	146,	328,	3.1e-27	3.4.11.10	Bacterial leucyl aminopeptidase.	Release of an N-terminal amino acid, preferentially leucine, but not glutamic or aspartic acids.	Zinc.	\N	\N	\N
33127	32955	Peptidase			scaffold_3	-	386718	390741													36.882	55.188	16.105	0.0227	2.2901	0.0253	0.668297	0.00764	3.42676	2176	DNA binding	IPR014782	Peptidase M1, membrane alanine aminopeptidase, N-terminal	HMMPfam	PF01433	Peptidase_M1	1	15,	434,	5.4e-124	3.4.11.-	Aminopeptidases.	\N	\N	\N	\N	\N
96506	96334	pelota			scaffold_265	-	10777	12906													49.528	64.241	13.276	0.0405	3.73064	0.264	0.770972	0.0271	4.83888	3838	nucleus	IPR005140	eRF1 domain 1	HMMPfam	PF03463	eRF1_1	1	1,	130,	8.5e-28
126803	126631	Peflin			scaffold_34	+	126301	127581	2	0.39268	1	0.13158	2	0.093954	1	0.19556	1	0.39583	1	0.36366	224.896	264.781	223.366	0.987	1.00685	0.48	0.849366	0.702	1.18541	3724	calcium ion binding	IPR002048	Calcium-binding EF-hand	BlastProDom	PD000012	SORC_SCHJA_Q94743;	2	71,138,	124,178,	4e-12,3e-06								1.084	2.8429
127639	127467	Pantothenate transporter	TMHs		scaffold_55	+	47022	48905													19.179	16.772	9.859	0.529	1.94533	0.72	1.14351	0.606	1.70119	3546	transporter activity	IPR011701	Major facilitator superfamily MFS-1	HMMPfam	PF07690	MFS_1	1	54,	428,	3.8e-29
121203	121031	Oxysterol-binding proteins			scaffold_151	-	11752	13509													152.829	124.606	53.484	0.00922	2.85747	0.204	1.2265	0.0287	2.32978	5876	steroid metabolic process	IPR000648	Oxysterol-binding protein	HMMPfam	PF01237	Oxysterol_BP	1	5,	404,	1.6e-74
84004	83832	Oxaloacetase	Other	cytosolic? Low expression	scaffold_10	+	287307	289071													5.575	5.216	2.775	0.0714	2.00901	0.756	1.06883	0.08	1.87964	2290	catalytic activity	IPR015809	Isocitrate lyase and phosphorylmutase, core	BlastProDom	PD001857	Q7RXA0_NEUCR_Q7RXA0;	1	122,	221,	2e-25	2.7.8.23	Carboxyvinyl-carboxyphosphonate phosphorylmutase.	1-carboxyvinyl carboxyphosphonate = 3-(hydrohydroxyphosphoryl)pyruvate + CO(2).	\N	\N	\N	\N
107758	107586	oxaloacetase	Other	Cytosolic? Low expression	scaffold_93	+	32039	33439													5.84	7.863	3.046	0.307	1.91727	0.573	0.742719	0.0291	2.58142	2290	catalytic activity	IPR015809	Isocitrate lyase and phosphorylmutase, core	BlastProDom	PD001857	Q7RXA0_NEUCR_Q7RXA0;	1	119,	218,	2e-25	2.7.8.23	Carboxyvinyl-carboxyphosphonate phosphorylmutase.	1-carboxyvinyl carboxyphosphonate = 3-(hydrohydroxyphosphoryl)pyruvate + CO(2).	\N	\N	\N	\N
67104	66932	Oxalate decarboxylase	SS		scaffold_25	-	101971	103943	0	0	3	0.21151	3	0.0709	0	0	1	0.19881	0	0	57.306	72.628	2688.05	0.0635	0.0213188	0.764	0.789035	0.0561	0.0270188	20187	nutrient reservoir activity	IPR006045	Cupin 1	HMMPfam	PF00190	Cupin_1	2	130,307,	273,449,	2e-11,9.2e-14								4.5301	1.9353
29026	28854	Oxalate decarboxylase	SS		scaffold_25	-	89776	92056													16.597	22.351	116.384	0.39	0.142606	0.173	0.742562	0.452	0.192045			IPR013096	Cupin 2, conserved barrel	HMMPfam	PF07883	Cupin_2	2	175,355,	251,430,	9.4e-15,4.8e-15								3.5136	0.75972
33336	33164	Outward-rectifier potassium channel	TMHs		scaffold_6	+	224317	227899													41.416	41.741	16.581	0.0572	2.4978	0.961	0.992214	0.0461	2.5174			IPR013099	Ion transport 2	HMMPfam	PF07885	Ion_trans_2	2	286,696,	361,771,	2.3e-19,4.5e-19
86645	86473	Oligosaccharyl transferase OST3/OST6 family	SS/TMH		scaffold_27	-	134505	135869													120.159	148.69	169.326	0.14	0.709631	0.125	0.808118	0.555	0.878129	19912	cell redox homeostasis	IPR006662	Thioredoxin-related	FPrintScan	PR00421	THIOREDOXIN	2	71,118,	80,129,	47,47	2.4.1.119	Dolichyl-diphosphooligosaccharide--protein glycosyltransferase.	Dolichyl diphosphooligosaccharide + protein L-asparagine = dolichyl diphosphate + a glycoprotein with the oligosaccharide chain attached by glycosylamine linkage to protein L-asparagine.	\N	N-Glycans biosynthesis	Metabolism of Complex Carbohydrates	METABOLIC
108195	108023	Oligopeptide transporter	TMHs		scaffold_101	-	89890	92555													161.6	65.633	219.988	0.688	0.734586	0.00646	2.46218	0.15	0.298348			IPR004813	Oligopeptide transporter OPT superfamily	HMMPfam	PF03169	OPT	1	62,	710,	2e-286
34626	34454	Oligopeptide transporter	TMHs	IVS	scaffold_29	-	112376	115129													440.414	168.513	98.977	0.0171	4.44966	0.0265	2.61353	0.197	1.70255			IPR004813	Oligopeptide transporter OPT superfamily	HMMPfam	PF03169	OPT	1	65,	478,	2.8e-93
25995	25823	Oligopeptide transporter	TMHs		scaffold_152	+	50301	53202													59.891	41.799	10.114	0.0378	5.92159	0.473	1.43283	0.0232	4.13279			IPR004813	Oligopeptide transporter OPT superfamily	HMMPfam	PF03169	OPT	1	1,	648,	2.3e-158
107671	107499	Nucleoside diphosphate kinase			scaffold_91	+	51586	52403	3	2.1631	1	0.20595	2	0.25217	1	0.30609	1	0.61956	1	0.5692	240.076	137.268	145.652	0.0887	1.64828	0.0378	1.74896	0.827	0.942438	2930	nucleoside diphosphate kinase activity	IPR001564	Nucleoside diphosphate kinase, core	BlastProDom	PD001018	NDK_NEUCR_Q9UUY8;	1	8,	141,	6e-53	2.7.4.6	Nucleoside-diphosphate kinase.	ATP + nucleoside diphosphate = ADP + nucleoside triphosphate.	\N	Purine metabolism	Nucleotide Metabolism	METABOLIC	5.3891	6.6911
102592	102420	nucleoprotein			scaffold_26	+	96359	103175													107.762	101.592	34.111	0.0104	3.15916	0.649	1.06073	0.0134	2.97828	3846	nuclear pore	IPR012929	Tetratricopeptide, MLP1/MLP2-like	HMMPfam	PF07926	TPR_MLP1_2	1	970,	1224,	2.1e-34	3.6.4.1	Myosin ATPase.	ATP + H(2)O = ADP + phosphate.	\N	Purine metabolism	Nucleotide Metabolism	METABOLIC	0	0.13668
125343	125171	Nucleoporin			scaffold_12	-	209821	216000													27.485	22.287	7.978	0.0252	3.4451	0.356	1.23323	0.0304	2.79356			IPR011046	WD40 repeat-like	superfamily	SSF50978	WD40 repeat-like	1	104,	280,	7.5e-05
68644	68472	Nuclease	SS		scaffold_35	+	86611	88223	2	0.28472	2	0.20323	2	0.068124	0	0	0	0	0	0	7.36	7.998	8.392	0.696	0.877026	0.59	0.92023	0.9	0.953051	5830	metabolic process	IPR003154	S1/P1 nuclease	HMMPfam	PF02265	S1-P1_nuclease	1	23,	318,	1.3e-60
18524	18352	Nuclear transport factor			scaffold_19	+	102038	102881	2	0.785	1	0.24939	3	0.47977	1	0.37065	1	0.75023	1	0.68926	172.628	232.657	198.423	0.662	0.87	0.167	0.741985	0.673	1.17253	3827	intracellular	IPR002075	Nuclear transport factor 2	HMMPfam	PF02136	NTF2	1	7,	121,	5.1e-41
28589	28417	Nuclear segregation protein			scaffold_16	-	251968	253979													20.166	14.546	17.162	0.538	1.17504	0.0446	1.38636	0.533	0.84757			IPR009053	Prefoldin	superfamily	SSF46579	Prefoldin	1	145,	267,	0.0054
86114	85942	Nuclear cap-binding protein subunit 1			scaffold_24	+	4537	8074													55.715	46.841	18.704	0.0361	2.97877	0.397	1.18945	0.0418	2.50433	3727	protein binding	IPR003890	MIF4G-like, type 3	HMMPfam	PF02854	MIF4G	1	30,	231,	0.0065								0.033362	0.17832
67117	66945	NRPS-like			scaffold_25	+	59972	64508													21.785	20.539	14.296	0.352	1.52385	0.865	1.06067	0.431	1.4367	2290	catalytic activity	IPR000873	AMP-dependent synthetase and ligase	FPrintScan	PR00154	AMPBINDING	2	455,467,	466,475,	36,36	1.2.1.31	Aminoadipate-semialdehyde dehydrogenase.	L-2-aminoadipate 6-semialdehyde + NADP(+) + H(2)O = L-2-aminoadipate + NADPH.	\N	Lysine biosynthesis	Amino Acid Metabolism	METABOLIC	0	0.10847
35317	35145	NRPS-like			scaffold_48	-	113584	117743													40.117	36.586	10.411	0.13	3.85333	0.731	1.09651	0.13	3.51417	2290	catalytic activity	IPR000873	AMP-dependent synthetase and ligase	FPrintScan	PR00154	AMPBINDING	2	176,188,	187,196,	0.00019,0.00019	6.2.1.12	4-coumarate--CoA ligase.	ATP + 4-coumarate + CoA = AMP + diphosphate + 4-coumaroyl-CoA.	\N	Flavonoids, stilbene and lignin biosynthesis	Biosynthesis of Secondary Metabolites	METABOLIC
100032	99860	NmrA-like protein			scaffold_10	+	117583	118602													21.632	49.194	92.069	0.0635	0.234954	0.148	0.439728	0.316	0.534317	4925	regulation of nitrogen utilization	IPR008030	NmrA-like	HMMPfam	PF05368	NmrA	1	5,	233,	9.5e-07
70683	70511	Nmr-A-like family domain-containing protein 1			scaffold_54	+	16478	17438													3.326	1.969	3.395	0.967	0.979676	0.152	1.68918	0.224	0.579971	4925	regulation of nitrogen utilization	IPR008030	NmrA-like	HMMPfam	PF05368	NmrA	1	6,	242,	9.9e-21
124216	124044	Nitrilase			scaffold_2	-	245520	246807													40.466	46.794	23.111	0.0873	1.75094	0.348	0.864769	0.06	2.02475	4924	nitrogen compound metabolic process	IPR003010	Nitrilase/cyanide hydratase and apolipoprotein N-acyltransferase	HMMPfam	PF00795	CN_hydrolase	1	8,	204,	3.1e-48	3.5.5.1	Nitrilase.	A nitrile + H(2)O = a carboxylate + NH(3).	\N	Nitrogen metabolism	Energy Metabolism	METABOLIC
496684	496512	nitrate reductase			scaffold_173	-	14948	18994													25.8	29.939	5.029	0.0124	5.13024	0.542	0.861752	0.0124	5.95327	4283	electron transport	IPR001199	Cytochrome b5	BlastProDom	PD000612	Q7XYI8_CHLS6_Q7XYI8;	1	435,	497,	9e-10
98634	98462	Nascent polypeptide-associated complex			scaffold_4	+	78771	79875	2	0.91671	1	0.39909	0	0	0	0	0	0	0	0	186.168	156.832	158.7	0.581	1.17308	0.265	1.18705	0.972	0.988229			IPR002715	Nascent polypeptide-associated complex NAC	HMMPfam	PF01849	NAC	1	38,	97,	3e-26
102761	102589	Nascent polypeptide-associated complex			scaffold_27	+	105542	106549													379.684	396.672	356.602	0.886	1.06473	0.739	0.957174	0.805	1.11237			IPR002715	Nascent polypeptide-associated complex NAC	HMMPfam	PF01849	NAC	1	48,	107,	2e-16
28836	28664	NADH:flavin oxidoreductase			scaffold_21	+	189556	191139													34.186	39.742	62.932	0.325	0.543221	0.618	0.860198	0.46	0.631507	7744	FMN binding	IPR001155	NADH:flavin oxidoreductase/NADH oxidase, N-terminal	HMMPfam	PF00724	Oxidored_FMN	1	41,	401,	5.5e-66	1.3.1.42	12-oxophytodienoate reductase.	8-[(1R,2R)-3-oxo-2-{(Z)-pent-2-enyl}cyclopentyl]octanoate + NADP(+) = (15Z)-12-oxophyto-10,15-dienoate + NADPH.	\N	\N	\N	\N
114999	114827	NADH-ubiquinone oxidoreductase		very small model	scaffold_11	-	166712	167052													233.442	236.366	249.045	0.843	0.937349	0.954	0.987629	0.891	0.94909	5816	NADH dehydrogenase (ubiquinone) activity										1.6.5.3	NADH dehydrogenase (ubiquinone).	NADH + ubiquinone = NAD(+) + ubiquinol.	FAD; Iron-sulfur.	Oxidative phosphorylation	Energy Metabolism	METABOLIC
128409	128237	NADH pyrophosphatase			scaffold_79	-	69695	71599													26.639	23.501	9.055	0.0401	2.94191	0.592	1.13353	0.0259	2.59536	9985	hydrolase activity	IPR000086	NUDIX hydrolase, core	FPrintScan	PR00502	NUDIXFAMILY	2	330,344,	344,359,	0.016,0.016	3.6.1.-	In phosphorous-containing anhydrides.	\N	\N	Starch and sucrose metabolism	Metabolism of Complex Carbohydrates	METABOLIC
21887	21715	NADH kinase			scaffold_10	+	79628	81111													36.288	44.523	26.568	0.335	1.36585	0.169	0.815039	0.144	1.67581	2404	NAD+ kinase activity	IPR002504	ATP-NAD/AcoX kinase	HMMPfam	PF01513	NAD_kinase	1	25,	296,	1.6e-64	2.7.1.23	NAD(+) kinase.	ATP + NAD(+) = ADP + NADP(+).	\N	Nicotinate and nicotinamide metabolism	Metabolism of Cofactors and Vitamins	METABOLIC
61257	61085	NADH dehydrogenase 1	SS/TMHs	small model w/ lg IVS	scaffold_1	-	288059	288729													96.743	37.278	98.04	0.962	0.986771	0.00148	2.59518	0.0209	0.380233			IPR009346	GRIM-19	HMMPfam	PF06212	GRIM-19	1	1,	111,	2.8e-15
303163	302991	NAD(P) transhydrogenase			scaffold_25	-	163235	164826													2.984	0.998	1.253	0.47	2.38148	0.0415	2.98998	0.867	0.796488
100352	100180	NAD-dependent formate dehydrogenase			scaffold_11	+	252029	253755	4	0.53776	3	0.276	5	0.16784	5	0.74418	1	0.25481	1	0.23411	904.599	1045.39	1120.39	0.84	0.807397	0.581	0.865318	0.95	0.933064	5830	metabolic process	IPR006139	D-isomer specific 2-hydroxyacid dehydrogenase, catalytic region	HMMPfam	PF00389	2-Hacid_dh	1	60,	345,	6.7e-19	1.2.1.2	Formate dehydrogenase.	Formate + NAD(+) = CO(2) + NADH.	\N	Glyoxylate and dicarboxylate metabolism	Carbohydrate Metabolism	METABOLIC	6.4784	15.724
25413	25241	NAD-dependent formate dehydrogenase			scaffold_116	-	22603	24005	0	0	0	0	0	0	0	0	2	0.52783	0	0	234.081	102.484	230.943	0.99	1.01359	0.456	2.28407	0.353	0.443763	5830	metabolic process	IPR006139	D-isomer specific 2-hydroxyacid dehydrogenase, catalytic region	HMMPfam	PF00389	2-Hacid_dh	1	60,	342,	3.7e-19	1.2.1.2	Formate dehydrogenase.	Formate + NAD(+) = CO(2) + NADH.	\N	Glyoxylate and dicarboxylate metabolism	Carbohydrate Metabolism	METABOLIC	2.0665	3.9569
127466	127294	NAD-dependent deacetylase hst4			scaffold_49	-	95797	98389													39.885	30.874	11.861	0.0301	3.3627	0.0737	1.29186	0.0426	2.60298	2176	DNA binding	IPR003000	NAD-dependent histone deacetylase, silent information regulator Sir2	HMMPfam	PF02146	SIR2	1	48,	308,	1.2e-15	3.5.1.-	In linear amides.	\N	\N	Nicotinate and nicotinamide metabolism	Metabolism of Cofactors and Vitamins	METABOLIC
91857	91685	NAD-dependent aldehyde dehydrogenase			scaffold_97	-	22045	24060	8	0.8368	2	0.12441	6	0.16982	2	0.1849	7	1.524	3	0.53132	1184.23	487.037	294.325	0.234	4.02354	0.013	2.43149	0.648	1.65476	5830	metabolic process	IPR015590	Aldehyde dehydrogenase	HMMPfam	PF00171	Aldedh	1	30,	492,	1.9e-257	1.2.1.3	Aldehyde dehydrogenase (NAD+).	An aldehyde + NAD(+) + H(2)O = an acid + NADH.	\N	1,2-Dichloroethane degradation	Biodegradation of Xenobiotics	METABOLIC	6.1956	9.1933
25649	25477	N-ethylmaleimide reductase			scaffold_129	+	6302	7772													55.189	63.521	15.121	0.0215	3.64982	0.473	0.868831	0.0152	4.20085	7744	FMN binding	IPR001155	NADH:flavin oxidoreductase/NADH oxidase, N-terminal	HMMPfam	PF00724	Oxidored_FMN	1	1,	371,	3.1e-37	1.6.99.1	NADPH dehydrogenase.	NADPH + acceptor = NADP(+) + reduced acceptor.	FMN or FAD.	\N	\N	\N
29061	28889	N-acetyltransferase 10			scaffold_26	+	29442	33321													7.437	6.632	6.35	0.587	1.17118	0.664	1.12138	0.906	1.04441	3724	calcium ion binding	IPR007807	Protein of unknown function DUF699, ATPase putative	HMMPfam	PF05127	DUF699	1	275,	493,	1.1e-120
285396	285224	N-acetylglucosaminyl-phosphatidylinositol biosynthetic protein	TMHs		scaffold_224	-	22192	24220													69.91	65.545	23.14	0.0472	3.02118	0.705	1.0666	0.0422	2.83254	4637	GPI anchor biosynthetic process	IPR007720	N-acetylglucosaminyl transferase component	HMMPfam	PF05024	Gpi1	1	123,	294,	3e-26
123358	123186	Myosin regulatory light chain			scaffold_320	-	13301	14147	0	0	0	0	1	0.052823	2	0.81787	0	0	0	0	24.582	8.606	19.641	0.406	1.25157	0.00245	2.85638	0.0279	0.438165	3724	calcium ion binding	IPR002048	Calcium-binding EF-hand	BlastProDom	PD000012	Q6C765_EEEEE_Q6C765;	2	62,131,	101,191,	5e-10,9e-20								1.0636	1.0636
387350	387178	Multidrug resistance protein 1	TMHs		scaffold_46	+	57626	59965													3.914	5.18	1.986	0.037	1.9708	0.0842	0.755598	0.0182	2.60826
109813	109641	Mucin-2			scaffold_139	-	37962	40564													46.678	42.685	21.668	0.0341	2.15424	0.446	1.09355	0.0428	1.96996	6387	UDP-N-acetylmuramoylalanyl-D-glutamyl-2,6-diaminopimelate-D-alanyl-D-alanine ligase activity										6.3.2.-	Acid--D-amino-acid ligases (peptide synthases).	\N	\N	Tryptophan metabolism	Amino Acid Metabolism	METABOLIC
30834	30662	Mot2p			scaffold_91	+	21330	25897													56.036	47.61	36.178	0.143	1.5489	0.403	1.17698	0.285	1.31599	2175	nucleic acid binding	IPR000504	RNA recognition motif, RNP-1	HMMPfam	PF00076	RRM_1	1	113,	170,	6.6e-05	6.3.2.-	Acid--D-amino-acid ligases (peptide synthases).	\N	\N	Tryptophan metabolism	Amino Acid Metabolism	METABOLIC
87841	87669	Monosaccharide transporter	TMHs		scaffold_37	-	97051	99078	1	0.08081	0	0	1	0.019335	3	0.27214	0	0	0	0	292.716	220.104	384.413	0.573	0.761462	0.0997	1.3299	0.265	0.572572	3642	sugar:hydrogen symporter activity	IPR003663	Sugar transporter	FPrintScan	PR00171	SUGRTRNSPORT	5	34,133,298,386,409,	44,152,308,407,421,	7.8e-34,7.8e-34,7.8e-34,7.8e-34,7.8e-34	5.3.1.4	L-arabinose isomerase.	L-arabinose = L-ribulose.	\N	Pentose and glucuronate interconversions	Carbohydrate Metabolism	METABOLIC
105860	105688	Monooxygenase	Possible aromatic ring hydroxylase		scaffold_60	-	129086	131076													220.615	83.426	106.948	0.0548	2.06282	0.00206	2.64444	0.269	0.780061	2888	monooxygenase activity	IPR003042	Aromatic-ring hydroxylase	FPrintScan	PR00420	RNGMNOXGNASE	4	35,182,328,343,	57,197,343,359,	1.1e-10,1.1e-10,1.1e-10,1.1e-10	1.14.13.1	Salicylate 1-monooxygenase.	Salicylate + NADH + O(2) = catechol + NAD(+) + H(2)O + CO(2).	FAD.	Fluorene degradation	Biodegradation of Xenobiotics	METABOLIC
64417	64245	Molybdenum cofactor synthesis			scaffold_11	+	15	419													1.973	2.238	1.627	0.843	1.21266	0.904	0.881591	0.704	1.37554	4894	Mo-molybdopterin cofactor biosynthetic process	IPR002820	Molybdopterin cofactor biosynthesis MoaC region	BlastProDom	PD003575	MOAC_RALSO_Q8Y1X7;	1	1,	110,	4e-23
29674	29502	Mitochondrial division protein			scaffold_41	-	10824	13128													73.724	84.746	23.597	0.0155	3.1243	0.434	0.869941	0.00776	3.59139	2313	1-alkyl-2-acetylglycerophosphocholine esterase activity	IPR001680	WD40 repeat	BlastProDom	PD000018	Q7S8R5_NEUCR_Q7S8R5;	2	392,517,	423,548,	0.0003,5e-09	3.1.1.47	2-acetyl-1-alkylglycerophosphocholine esterase.	2-acetyl-1-alkyl-sn-glycero-3-phosphocholine + H(2)O = 1-alkyl-sn- glycero-3-phosphocholine + acetate.	\N	Glycerolipid metabolism	Metabolism of Complex Lipids	METABOLIC
128046	127874	Mitochondrial carrier protein			scaffold_67	-	107422	108801	2	0.45945	0	0	2	0.10993	0	0	3	0.98655	0	0	170.563	122.159	369.943	0.227	0.461052	0.102	1.39624	0.0999	0.33021	3708	binding	IPR001993	Mitochondrial substrate carrier	HMMPfam	PF00153	Mito_carr	3	24,123,225,	112,212,310,	1.6e-27,8.6e-06,0.00038								1.3234	0.9265
108072	107900	Mitochondrial 2-oxodicarboxylate carrier			scaffold_99	+	80531	82185													51.751	41.758	32.589	0.0771	1.58799	0.151	1.23931	0.292	1.28135	3708	binding	IPR002113	Adenine nucleotide translocator 1	FPrintScan	PR00927	ADPTRNSLCASE	3	11,139,254,	23,160,269,	2.8e-09,2.8e-09,2.8e-09
128859	128687	microfibrillar-association protein	TMHs		scaffold_97	-	94319	96440													17.221	22.25	10.651	0.0918	1.61684	0.137	0.773978	0.0308	2.08901			IPR013027	FAD-dependent pyridine nucleotide-disulphide oxidoreductase	HMMPfam	PF07992	Pyr_redox_2	1	9,	49,	4.1e-05
121796	121624	Mg2+ transporter	TMHs		scaffold_181	-	18833	20521													53.601	84.459	82.78	0.129	0.647511	0.105	0.634639	0.95	1.02028	9320	membrane	IPR002523	Mg2+ transporter protein, CorA-like	HMMPfam	PF01544	CorA	1	8,	317,	5.5e-39
174086	173914	MFS-type transporter	TMHs		scaffold_12	+	200142	202384													22.594	16.524	7.237	0.014	3.12201	0.241	1.36734	0.0564	2.28327	3546	transporter activity	IPR011701	Major facilitator superfamily MFS-1	HMMPfam	PF07690	MFS_1	1	33,	462,	4.4e-38
102507	102335	MFS-type transporter	TMHs		scaffold_25	+	151988	154038													77.131	72.006	19.961	0.0287	3.86408	0.767	1.07117	0.0351	3.60733	3546	transporter activity	IPR011701	Major facilitator superfamily MFS-1	HMMPfam	PF07690	MFS_1	1	1,	413,	7.7e-47
21914	21742	Methylglyoxal reductase	TMHs		scaffold_10	-	178441	179742	1	0.1424	0	0	0	0	0	0	2	1.0127	2	0.5901	71.722	47.113	23.379	0.0545	3.0678	0.0219	1.52234	0.124	2.01518	9710	oxidoreductase activity	IPR001395	Aldo/keto reductase	BlastProDom	PD000288	Q6BMS8_EEEEE_Q6BMS8;	1	8,	225,	5e-41	1.1.1.-	With NAD(+) or NADP(+) as acceptor.	\N	\N	Bile acid biosynthesis	Lipid Metabolism	METABOLIC
26765	26593	methylglyoxal reductase			scaffold_240	-	17992	19138													48.813	50.86	16.851	0.0135	2.89674	0.86	0.959752	0.024	3.01822	9710	oxidoreductase activity	IPR001395	Aldo/keto reductase	BlastProDom	PD000288	O32210_BACSU_O32210;	1	1,	248,	2e-62	1.1.-.-	Acting on the CH-OH group of donors.	\N	\N	Benzoate degradation via CoA ligation	Biodegradation of Xenobiotics	METABOLIC
120921	120749	Methanol oxidase (MOX)			scaffold_139	+	28556	31304	0	0	0	0	0	0	0	0	12	2.8556	12	2.1657	10480.1	7015.26	1014.82	0.251	10.3271	0.155	1.4939	0.316	6.91283	9821	oxidoreductase activity, acting on CH-OH group of donors	IPR000172	Glucose-methanol-choline oxidoreductase, N-terminal	HMMPfam	PF00732	GMC_oxred_N	1	7,	328,	4.1e-73	1.1.99.1	Choline dehydrogenase.	Choline + acceptor = betaine aldehyde + reduced acceptor.	PQQ.	Glycine, serine and threonine metabolism	Amino Acid Metabolism	METABOLIC	5.9773	3.4868
108688	108516	Methanol oxidase (MOX)			scaffold_112	+	69632	72503													29.951	22.518	7.219	0.00756	4.14891	0.363	1.33009	0.0509	3.11927	9821	oxidoreductase activity, acting on CH-OH group of donors	IPR000172	Glucose-methanol-choline oxidoreductase, N-terminal	HMMPfam	PF00732	GMC_oxred_N	1	9,	333,	3.2e-59	1.1.99.1	Choline dehydrogenase.	Choline + acceptor = betaine aldehyde + reduced acceptor.	PQQ.	Glycine, serine and threonine metabolism	Amino Acid Metabolism	METABOLIC
72923	72751	Methanol oxidase (MOX)			scaffold_82	+	88117	90764													14.018	14.891	3.809	0.209	3.68023	0.834	0.941374	0.176	3.90943	9821	oxidoreductase activity, acting on CH-OH group of donors	IPR000172	Glucose-methanol-choline oxidoreductase, N-terminal	HMMPfam	PF00732	GMC_oxred_N	1	8,	332,	1e-59	1.1.99.1	Choline dehydrogenase.	Choline + acceptor = betaine aldehyde + reduced acceptor.	PQQ.	Glycine, serine and threonine metabolism	Amino Acid Metabolism	METABOLIC
128969	128797	Metalloprotease	SS, TMH		scaffold_102	-	65799	68492	3	0.3116	0	0	3	0.095627	2	0.24166	0	0	0	0	54.98	10.485	7.436	0.0901	7.39376	0.0374	5.24368	0.729	1.41003			IPR001842	Peptidase M36, fungalysin	FPrintScan	PR00999	FUNGALYSIN	5	192,253,349,387,549,	214,272,369,407,571,	2.1e-19,2.1e-19,2.1e-19,2.1e-19,2.1e-19
130728	130556	Metacaspase-1B			scaffold_217	-	35812	37901													6.121	8.533	10.282	0.285	0.595312	0.193	0.717333	0.659	0.829897	4639	proteolysis	IPR011600	Peptidase C14, caspase catalytic	HMMPfam	PF00656	Peptidase_C14	1	58,	295,	1.4e-26
38095	37923	membrane protein	TMHs		scaffold_243	-	7757	15517													73.865	62.552	21.491	0.0313	3.43702	0.436	1.18086	0.0497	2.91061	6075	acyltransferase activity	IPR001451	Bacterial transferase hexapeptide repeat	HMMPfam	PF00132	Hexapep	5	1081,1130,1375,1596,1619,	1098,1147,1392,1608,1636,	16,8.9,2.3,0.13,1.1e+02
119625	119453	Membrane autotransporter barrel domain	SS		scaffold_94	+	87395	89371	1	0.08919	1	0.063661	0	0	0	0	7	2.2281	7	1.4904	25.754	33.191	21.835	0.525	1.17948	0.175	0.775933	0.106	1.52008	2290	catalytic activity	IPR011041	Soluble quinoprotein glucose dehydrogenase	superfamily	SSF50952	Soluble quinoprotein glucose dehydrogenase	1	181,	368,	0.008
33308	33136	Meiotically upregulated gene		Also related subtilisin	scaffold_6	+	57307	61609													117.242	156.436	20.811	0.0168	5.63366	0.503	0.749457	0.022	7.51699	2700	subtilase activity	IPR000008	C2 calcium-dependent membrane targeting	FPrintScan	PR00360	C2DOMAIN	3	564,591,616,	576,604,624,	0.06,0.06,0.06								0	0.16453
31097	30925	Meiotically upregulated gene			scaffold_106	+	88830	92938													35.252	45.077	10.474	0.022	3.36567	0.35	0.78204	0.0134	4.3037			IPR000008	C2 calcium-dependent membrane targeting	FPrintScan	PR00360	C2DOMAIN	2	412,464,	424,472,	13,13
109491	109319	Mei4-dependent protein			scaffold_131	+	9552	12739													28.935	31.885	11.129	0.0439	2.59996	0.539	0.90748	0.0358	2.86504			IPR006652	Kelch repeat type 1	HMMPfam	PF01344	Kelch_1	1	263,	310,	7.2e-08
38873	38701	MCO fragment			scaffold_61	+	102144	102365													------	------	------	NaN	#VALUE!	NaN	#VALUE!	NaN	#VALUE!	3722	copper ion binding	IPR011706	Multicopper oxidase, type 2	HMMPfam	PF07731	Cu-oxidase_2	1	1,	56,	1.2e-07
77831	77659	MCO Fet3			scaffold_181	-	611	2793													22	10.539	47.521	0.209	0.462953	0.107	2.08748	0.0639	0.221776	9710	oxidoreductase activity	IPR001117	Multicopper oxidase, type 1	HMMPfam	PF00394	Cu-oxidase	1	151,	323,	4.3e-39	1.-.-.-	Oxidoreductases.	\N	\N	\N	\N	\N
110438	110266	MCO		MCO4-like; nearby Glu may support iron oxidation.	scaffold_156	+	6181	9001	10	2.4003	9	3.2216	9	0.79937	7	1.2511	7	1.4304	7	2.0522	27.527	20.052	60.856	0.404	0.45233	0.0882	1.37278	0.252	0.329499	9710	oxidoreductase activity	IPR001117	Multicopper oxidase, type 1	HMMPfam	PF00394	Cu-oxidase	1	166,	317,	1e-42	1.10.3.2	Laccase.	4 benzenediol + O(2) = 4 benzosemiquinone + 2 H(2)O.	Copper.	\N	\N	\N	1.0464	2.9632
130011	129839	MCO	SS, TMH	MCCO4-like; nearby glu may support iron oxidation	scaffold_156	+	12623	15622	6	1.4485	6	1.0339	5	0.25053	7	2.6078	8	8.7916	7	6.095	40.434	208.794	180.121	0.0905	0.224482	0.00987	0.193655	0.852	1.15919	9710	oxidoreductase activity	IPR001117	Multicopper oxidase, type 1	HMMPfam	PF00394	Cu-oxidase	1	217,	370,	2.3e-33	1.10.3.2	Laccase.	4 benzenediol + O(2) = 4 benzosemiquinone + 2 H(2)O.	Copper.	\N	\N	\N	0.49573	1.023
32240	32068	MCO	TMHs	MCO2-like	scaffold_217	-	1620	4283	0	0	0	0	0	0	0	0	2	0.31343	0	0	86.207	105.678	43.336	0.0987	1.98927	0.289	0.815752	0.0563	2.43857	9710	oxidoreductase activity	IPR001117	Multicopper oxidase, type 1	HMMPfam	PF00394	Cu-oxidase	1	226,	384,	6.6e-37	1.10.3.2	Laccase.	4 benzenediol + O(2) = 4 benzosemiquinone + 2 H(2)O.	Copper.	\N	\N	\N
29655	29483	MCO	SS	Not a canonical laccase	scaffold_40	-	41138	44168													15.013	17.042	11.993	0.719	1.25181	0.628	0.880941	0.543	1.421	9710	oxidoreductase activity	IPR001117	Multicopper oxidase, type 1	HMMPfam	PF00394	Cu-oxidase	1	205,	360,	5.5e-29	1.10.3.2	Laccase.	4 benzenediol + O(2) = 4 benzosemiquinone + 2 H(2)O.	Copper.	\N	\N	\N
499706	499534	MAP/microtubule affinity regulating kinase 4			scaffold_204	+	37923	40415													99.435	110.608	51.548	0.36	1.92898	0.769	0.898986	0.291	2.14573	3043	protein kinase activity	IPR000719	Protein kinase, core	BlastProDom	PD000001	Q9ZNT4_ORYSA_Q9ZNT4;	1	96,	416,	2e-22	2.7.1.-	Phosphotransferases with an alcohol group as acceptor.	\N	\N	Sphingoglycolipid metabolism	Metabolism of Complex Lipids	METABOLIC
89258	89086	Mannose-6-Phosphatase	TMHs		scaffold_54	+	13906	15666	8	2.1991	6	0.60422	7	0.40107	9	4.1653	12	13.912	14	24.114	26.516	20.051	29.199	0.801	0.908113	0.289	1.32243	0.347	0.686702			IPR005135	Endonuclease/exonuclease/phosphatase	HMMPfam	PF03372	Exo_endo_phos	1	57,	371,	0.00096
105341	105169	Mannoprotein (Possible)	SS		scaffold_53	-	57790	59347	4	1.0636	5	1.2395	4	0.25448	3	0.92599	3	2.7275	3	1.722	895.638	623.573	1955.64	0.0366	0.457977	0.0441	1.4363	0.0126	0.318859
19261	19089	mannoprotein (possible)	SS, TMH		scaffold_53	-	47563	49154													108.136	99.654	103.972	0.938	1.04005	0.648	1.08511	0.931	0.95847
127987	127815	Malate synthase	Other	peroxisomal?	scaffold_65	+	102667	104216													47.218	51.657	23.375	0.0657	2.02002	0.463	0.914068	0.0467	2.20993	3737	GTP binding	IPR001806	Ras GTPase	FPrintScan	PR00449	RASTRNSFRMNG	3	9,100,171,	30,122,184,	2.9e-05,2.9e-05,2.9e-05
22348	22176	Malate dehydrogenase	Mito		scaffold_16	-	20686	21956	3	0.44469	0	0	2	0.067658	1	0.14317	4	1.3357	1	0.26624	64.11	15.309	51.05	0.705	1.25583	0.00278	4.18773	0.0922	0.299882	4265	tricarboxylic acid cycle intermediate metabolic process	IPR001236	Lactate/malate dehydrogenase	HMMPfam	PF00056	Ldh_1_N	1	24,	164,	2.4e-55	1.1.1.37	Malate dehydrogenase.	(S)-malate + NAD(+) = oxaloacetate + NADH.	\N	Citrate cycle (TCA cycle)	Carbohydrate Metabolism	METABOLIC	3.7005	7.1164
19624	19452	Malate dehydrogenase			scaffold_82	-	21947	23501	3	0.44789	1	0.096962	4	0.14995	0	0	3	0.96172	1	0.26799	334.054	217.545	107.488	0.0103	3.10783	0.0248	1.53556	0.0327	2.0239	4265	tricarboxylic acid cycle intermediate metabolic process	IPR001236	Lactate/malate dehydrogenase	HMMPfam	PF00056	Ldh_1_N	1	2,	146,	4.8e-67	1.1.1.37	Malate dehydrogenase.	(S)-malate + NAD(+) = oxaloacetate + NADH.	\N	Citrate cycle (TCA cycle)	Carbohydrate Metabolism	METABOLIC	4.2018	3.3309
95579	95407	Maganese superoxide dismutase			scaffold_207	-	25510	26533													1010.34	1033.19	698.037	0.25	1.44739	0.946	0.977875	0.208	1.48014	3145	superoxide dismutase activity	IPR001189	Manganese and iron superoxide dismutase	BlastProDom	PD000475	Q96W28_PHACH_Q96W28;	1	98,	197,	4e-49	1.15.1.1	Superoxide dismutase.	2 peroxide radical + 2 H(+) = O(2) + H(2)O(2).	Copper and Zinc or Iron or Manganese.	\N	\N	\N	1.6043	4.1595
126728	126556	Long chain fatty acid CoA ligase			scaffold_33	+	75909	78945													80.105	59.549	20.403	0.0106	3.92614	0.432	1.34519	0.0663	2.91864	2290	catalytic activity	IPR000873	AMP-dependent synthetase and ligase	FPrintScan	PR00154	AMPBINDING	2	245,257,	256,265,	0.0063,0.0063	6.2.1.3	Long-chain-fatty-acid--CoA ligase.	ATP + a long-chain carboxylic acid + CoA = AMP + diphosphate + an acyl-CoA.	\N	Fatty acid metabolism	Lipid Metabolism	METABOLIC	0.6624	0.88764
107720	107548	Long chain fatty acid CoA ligase		fatty acid activator 1	scaffold_92	-	43898	46547													190.702	172.58	84.779	0.0411	2.2494	0.826	1.10501	0.185	2.03565	2290	catalytic activity	IPR000873	AMP-dependent synthetase and ligase	FPrintScan	PR00154	AMPBINDING	2	252,264,	263,272,	0.0021,0.0021	6.2.1.3	Long-chain-fatty-acid--CoA ligase.	ATP + a long-chain carboxylic acid + CoA = AMP + diphosphate + an acyl-CoA.	\N	Fatty acid metabolism	Lipid Metabolism	METABOLIC	0.46648	0.4054
89497	89325	Long chain fatty acid CoA ligase			scaffold_57	-	10061	13231													31.39	32.981	26.767	0.792	1.17271	0.844	0.95176	0.739	1.23215	2290	catalytic activity	IPR000873	AMP-dependent synthetase and ligase	FPrintScan	PR00154	AMPBINDING	2	247,259,	258,267,	0.092,0.092	6.2.1.3	Long-chain-fatty-acid--CoA ligase.	ATP + a long-chain carboxylic acid + CoA = AMP + diphosphate + an acyl-CoA.	\N	Fatty acid metabolism	Lipid Metabolism	METABOLIC
410904	410732	Lipoate-protein ligase A			scaffold_55	+	117815	119768													38.399	30.216	29.559	0.233	1.29906	0.136	1.27082	0.929	1.02223	2290	catalytic activity	IPR004143	Biotin/lipoate A/B protein ligase	HMMPfam	PF03099	BPL_LipA_LipB	1	120,	201,	8e-19	6.3.2.-	Acid--D-amino-acid ligases (peptide synthases).	\N	\N	Tryptophan metabolism	Amino Acid Metabolism	METABOLIC
106898	106726	Lipase/acylhydrolase domain protein	SS		scaffold_76	-	25062	26751	4	1.6763	7	2.251	7	0.59643	1	0.25398	0	0	0	0	60.65	54.326	8.543	0.00572	7.09938	0.581	1.11641	0.00447	6.35912	4758	lipid metabolic process	IPR001087	Lipase, GDSL	HMMPfam	PF00657	Lipase_GDSL	1	148,	348,	6.1e-05								2.2272	0.868
19200	19028	Lipase class3	SS		scaffold_48	-	47705	49112	6	6.8599	5	1.2044	6	0.76047	6	1.7901	2	1.9246	2	1.342	1902.8	273.556	21.698	0.000833	87.6948	0.000244	6.9558	0.00714	12.6074	3166	triacylglycerol lipase activity	IPR002921	Lipase, class 3	HMMPfam	PF01764	Lipase_3	1	104,	247,	3.5e-24								2.2447	0.8013
36831	36659	Lipase class 3	SS	133 aa	scaffold_120	-	10791	12368	3	0.92791	0	0	2	0.11962	0	0	0	0	0	0	285.392	85.768	178.493	0.473	1.5989	0.00521	3.32749	0.292	0.480512	3166	triacylglycerol lipase activity	IPR002921	Lipase, class 3	HMMPfam	PF01764	Lipase_3	1	99,	241,	9.5e-19								0.65532	0.22336
20267	20095	Lipase class 3			scaffold_153	+	32637	35256	0	0	0	0	4	0.09526	0	0	0	0	0	0	29.742	23.195	26.528	0.895	1.12116	0.718	1.28226	0.91	0.874359	2290	catalytic activity	IPR002921	Lipase, class 3	HMMPfam	PF01764	Lipase_3	1	182,	341,	1.3e-13								0	1.0013
61501	61329	Lipase class 3	SS		scaffold_1	-	399066	400184													177.863	169.922	58.63	0.0207	3.03365	0.805	1.04673	0.0127	2.89821	3166	triacylglycerol lipase activity	IPR002921	Lipase, class 3	HMMPfam	PF01764	Lipase_3	1	110,	253,	4.7e-23	3.1.1.-	Carboxylic ester hydrolases.	\N	\N	2,4-Dichlorobenzoate degradation	Biodegradation of Xenobiotics	METABOLIC
129344	129172	Lipase class 3	SS		scaffold_120	+	21357	22654													7.965	2.868	30.06	0.103	0.26497	0.0759	2.7772	0.0319	0.0954092	3166	triacylglycerol lipase activity	IPR002921	Lipase, class 3	HMMPfam	PF01764	Lipase_3	1	97,	239,	1.9e-25
105822	105650	Lipase class 3	SS		scaffold_60	+	47502	49045													97.876	83.321	75.274	0.351	1.30026	0.322	1.17469	0.726	1.1069	3166	triacylglycerol lipase activity	IPR002921	Lipase, class 3	HMMPfam	PF01764	Lipase_3	1	101,	243,	3.3e-31
32268	32096	Lipase 4			scaffold_221	-	8502	11220													51.977	36.635	4.271	0.03	12.1697	0.122	1.41878	0.0323	8.57762	2533	carboxylesterase activity	IPR002018	Carboxylesterase, type B	HMMPfam	PF00135	COesterase	1	1,	526,	1.8e-105	3.1.1.1	Carboxylesterase.	A carboxylic ester + H(2)O = an alcohol + a carboxylic anion.	\N	\N	\N	\N
99282	99110	Lipase 4	SS,TMHs, IVS		scaffold_7	-	78718	84113													20.837	69.282	4.064	0.0334	5.12721	0.21	0.300756	0.0477	17.0477	2533	carboxylesterase activity	IPR002018	Carboxylesterase, type B	HMMPfam	PF00135	COesterase	1	5,	534,	9.9e-76	3.1.1.1	Carboxylesterase.	A carboxylic ester + H(2)O = an alcohol + a carboxylic anion.	\N	\N	\N	\N
120460	120288	lipase			scaffold_121	+	70982	71848													0.172	0.533	------	NaN	#VALUE!	0.113	0.322702	NaN	#VALUE!	4758	lipid metabolic process	IPR001087	Lipase, GDSL	HMMPfam	PF00657	Lipase_GDSL	1	36,	60,	2.3e-05
424826	424654	Leukotriene-A4 hydrolase			scaffold_62	-	99107	102256	0	0	0	0	0	0	3	0.20936	6	1.2653	7	1.1624	7.903	6.577	5.423	0.291	1.45731	0.243	1.20161	0.579	1.2128	4639	proteolysis	IPR014782	Peptidase M1, membrane alanine aminopeptidase, N-terminal	FPrintScan	PR00756	ALADIPTASE	4	155,290,317,336,	170,300,332,348,	3.3e-13,3.3e-13,3.3e-13,3.3e-13	3.3.2.6	Leukotriene-A4 hydrolase.	(7E,9E,11Z,14Z)-(5S,6S)-5,6-epoxyicosa-7,9,11,14-tetraenoate + H(2)O = (6Z,8E,10E,14Z)-(5S,12R)-5,12-dihydroxyicosa-6,8,10,14-tetraenoate.	\N	Prostaglandin and leukotriene metabolism	Metabolism of Complex Lipids	METABOLIC
101593	101421	Lactate dehygrogenase			scaffold_19	+	130348	132485													49.543	68.317	23.134	0.0615	2.14157	0.202	0.725193	0.027	2.9531	2290	catalytic activity	IPR006094	FAD linked oxidase, N-terminal	HMMPfam	PF01565	FAD_binding_4	1	24,	166,	4.4e-40	1.1.2.4	D-lactate dehydrogenase (cytochrome).	(R)-lactate + 2 ferricytochrome c = pyruvate + 2 ferrocytochrome c.	FAD.	Pyruvate metabolism	Carbohydrate Metabolism	METABOLIC
110243	110071	kinase			scaffold_150	+	59081	60184													24.402	43.674	35.929	0.232	0.679173	0.00817	0.558731	0.521	1.21556
110383	110211	ketol-acid reductoisomerase			scaffold_155	-	11061	12571													70.803	94.744	10.62	0.0326	6.66695	0.171	0.747309	0.0202	8.92128	9710	oxidoreductase activity	IPR013116	Acetohydroxy acid isomeroreductase, catalytic	HMMPfam	PF07991	IlvN	1	16,	183,	7.7e-54	1.1.1.86	Ketol-acid reductoisomerase.	(R)-2,3-dihydroxy-3-methylbutanoate + NADP(+) = (S)-2-hydroxy-2-methyl- 3-oxobutanoate + NADPH.	\N	Valine, leucine and isoleucine biosynthesis	Amino Acid Metabolism	METABOLIC
21423	21251	Isopentenyl-diphosphate delta-isomerase		Isoprenoid biosyn	scaffold_5	-	2575	3494													122.487	123.545	196.843	0.503	0.622257	0.976	0.991436	0.519	0.627632	9985	hydrolase activity	IPR002667	Isopentenyl-diphosphate delta-isomerase	BlastProDom	PD004109	Q874I0_EMENI_Q874I0;	1	41,	193,	1e-51	5.3.3.2	Isopentenyl-diphosphate delta-isomerase.	Isopentenyl diphosphate = dimethylallyl diphosphate.	\N	Sterol biosynthesis	Lipid Metabolism	METABOLIC
93331	93159	Isocitrate lyase	Other	Probable peroxisomal, PKL	scaffold_129	-	11360	13532													143.628	92.541	59.163	0.0692	2.42767	0.0738	1.55205	0.276	1.56417	2290	catalytic activity	IPR015809	Isocitrate lyase and phosphorylmutase, core	BlastProDom	PD001857	Q8X192_EEEEE_Q8X192;	2	167,362,	310,448,	6e-52,1e-37	4.1.3.1	Isocitrate lyase.	Isocitrate = succinate + glyoxylate.	\N	Glyoxylate and dicarboxylate metabolism	Carbohydrate Metabolism	METABOLIC	1.4492	1.0911
32761	32589	Isochorismatase hydrolase			scaffold_441	+	3422	5010													43.761	28.662	13.016	0.287	3.36209	0.345	1.5268	0.456	2.20206	2290	catalytic activity	IPR000868	Isochorismatase hydrolase	HMMPfam	PF00857	Isochorismatase	1	1,	199,	9.3e-05
298991	298819	Interferon-induced GTP-binding protein			scaffold_245	+	21099	25165													13.129	8.341	4.284	0.0371	3.06466	0.0636	1.57403	0.079	1.94701	3737	GTP binding	IPR001401	Dynamin, GTPase region	FPrintScan	PR00195	DYNAMIN	4	36,60,233,258,	54,77,249,277,	1.2e-23,1.2e-23,1.2e-23,1.2e-23
410445	410273	Inositol hexakisphosphate kinase 1			scaffold_55	-	91908	93344													35.207	30.074	26.403	0.446	1.33345	0.513	1.17068	0.736	1.13904
22478	22306	Inosine triphosphate pyrophosphatase			scaffold_18	+	72072	72858													35.353	42.053	30.042	0.807	1.17679	0.427	0.840677	0.595	1.39981	9985	hydrolase activity	IPR002637	Ham1-like protein	HMMPfam	PF01725	Ham1p_like	1	6,	184,	7.1e-52	3.6.1.19	Nucleoside-triphosphate pyrophosphatase.	A nucleoside triphosphate + H(2)O = a nucleotide + diphosphate.	\N	Pyrimidine metabolism	Nucleotide Metabolism	METABOLIC
117613	117441	Inorganic phosphate transporter	TMHs		scaffold_46	+	106203	108111	1	0.077912	2	0.11428	1	0.018641	1	0.082653	2	0.3438	3	0.66743	6.498	4.712	5.624	0.857	1.15541	0.158	1.37903	0.826	0.837838	3614	inorganic phosphate transmembrane transporter activity	IPR005828	General substrate transporter	HMMPfam	PF00083	Sugar_tr	1	47,	527,	9.8e-28	5.3.1.4	L-arabinose isomerase.	L-arabinose = L-ribulose.	\N	Pentose and glucuronate interconversions	Carbohydrate Metabolism	METABOLIC
23992	23820	inorganic phosphate transporter	TMHs		scaffold_51	-	26836	28793													105.024	52.394	73.479	0.273	1.42931	0.0226	2.0045	0.308	0.713047	3546	transporter activity	IPR011701	Major facilitator superfamily MFS-1	HMMPfam	PF07690	MFS_1	1	57,	211,	4.7e-12
31993	31821	Initiator tRNA phosphoribosyl-transferase			scaffold_180	+	49076	51045													50.641	39.682	16.966	0.0481	2.98485	0.163	1.27617	0.074	2.33891	9962	transferase activity, transferring pentosyl groups	IPR007306	Initiator tRNA phosphoribosyl transferase	HMMPfam	PF04179	Init_tRNA_PT	1	1,	465,	3.4e-83	2.4.2.-	Pentosyltransferases.	\N	\N	\N	\N	\N
19997	19825	Immunomodulatory protein	SS		scaffold_118	+	66282	67054	1	0.32731	1	0.23362	1	0.078313	2	0.77472	1	0.70282	1	0.6457	24.287	23.604	120.112	0.203	0.202203	0.954	1.02894	0.207	0.196517			IPR010829	Cerato-platanin	HMMPfam	PF07249	Cerato-platanin	1	26,	143,	1.1e-56
473608	473436	imidazoleglycerol phosphate synthase			scaffold_9	-	59148	61530													30.887	33.756	19.182	0.0901	1.61021	0.592	0.915008	0.085	1.75977	2290	catalytic activity	IPR011702	Glutamine amidotransferase superfamily	FPrintScan	PR00096	GATASE	2	102,214,	113,227,	0.083,0.083	2.4.2.-	Pentosyltransferases.	\N	\N	\N	\N	\N
36630	36458	Hypothetical HMG-Box transcription factor			scaffold_107	-	89279	89894													256.756	61.377	64.265	0.0419	3.99527	0.00118	4.18326	0.924	0.955061	2176	DNA binding	IPR000910	High mobility group box, HMG1/HMG2	HMMPfam	PF00505	HMG_box	1	24,	67,	1.6e-08
34348	34176	Hypothetical GPI	SS, TMHs, GPI-anchored		scaffold_23	-	165428	166699													1493.45	1414.01	1747.03	0.628	0.854853	0.762	1.05619	0.514	0.809376
17748	17576	Hypothetical (Possible acyl carrier protein)	109aa		scaffold_2	-	55167	56109													219.157	176.348	261.212	0.553	0.839001	0.267	1.24275	0.243	0.675114	51	acyl carrier activity	IPR003231	Acyl carrier protein (ACP)	BlastProDom	PD000887	Q6C926_EEEEE_Q6C926;	1	74,	116,	2e-06
385437	385265	Hypothetical		107 aa	scaffold_45	+	74935	75518													174.006	10.836	16.804	0.028	10.355	0.00113	16.0581	0.514	0.644846
27794	27622	Hypothetical	CBM		scaffold_5	+	190244	193748	8	1.9464	8	0.83388	9	0.40742	8	3.3167	0	0	1	0.10703	165.967	156.261	12.133	0.0416	13.679	0.855	1.06211	0.039	12.879	2933	hydrolase activity, hydrolyzing O-glycosyl compounds	IPR000254	Cellulose-binding region, fungal	BlastProDom	PD001821	Q9UVS8_ASPNG_Q9UVS8;	1	795,	822,	3e-07								1.5601	1.5601
115622	115450	Hypothetical	SS		scaffold_17	+	184397	186806	7	2.1906	4	0.44316	3	0.078233	6	4.0015	7	16.684	7	17.312	18.612	23.881	20.615	0.904	0.902838	0.21	0.779364	0.86	1.15843			IPR000073	Alpha/beta hydrolase fold-1	HMMPfam	PF00561	Abhydrolase_1	1	120,	240,	4.5e-09
15920	15748	Hypothetical	SS		scaffold_170	-	51507	54469	5	0.38817	0	0	2	0.024281	8	0.69597	0	0	0	0	16.479	12.587	8.109	0.0598	2.03219	0.22	1.30921	0.115	1.55223			IPR008964	Invasin/intimin cell-adhesion	superfamily	SSF49373	Invasin/intimin cell-adhesion fragments	1	232,	330,	0.0044								1.7283	0.62343
89915	89743	Hypothetical	SS		scaffold_63	+	52246	53099	5	8.3351	4	1.8847	2	0.14237	5	4.6095	0	0	0	0	412.196	245.67	2373.21	0.00802	0.173687	0.0674	1.67784	0.000846	0.103518
124539	124367	Hypothetical			scaffold_4	+	376106	377288	5	7.6695	6	18.168	9	121.66	4	4.5537	5	46.376	5	36.092	12049.4	8839.79	16149.2	0.868	0.746134	0.388	1.36309	0.724	0.547383																			4.4956	21.156
23138	22966	Hypothetical			scaffold_30	-	66205	67471	5	1.1546	5	0.82408	5	0.27624	4	0.79764	0	0	0	0	13.131	12.271	4.258	0.134	3.08384	0.768	1.07008	0.139	2.88187																			4.4943	2.0265
19558	19386	Hypothetical			scaffold_75	-	58169	58892	5	2.615	6	5.8694	8	5.1761	3	1.5151	0	0	0	0	60.6	60.688	17	0.0754	3.56471	0.999	0.99855	0.139	3.56988
36390	36218	Hypothetical		related to DNA damage-responsive protein	scaffold_94	-	95483	96549	5	2.4803	2	0.57417	2	0.19247	3	0.85337	0	0	0	0	3992.2	2333.58	226.761	0.000127	17.6053	0.209	1.71076	0.0137	10.2909																			0.75477	5.0465
18557	18385	Hypothetical	SS		scaffold_20	-	199405	201286	5	0.77126	2	0.192	0	0	3	0.44777	0	0	0	0	141.619	83.705	1707.91	0.0154	0.0829195	0.0068	1.69188	0.00646	0.0490102
17086	16914	Hypothetical		lg IVS	scaffold_289	-	903	3718	4	0.80686	3	0.31404	2	0.066972	5	1.5887	0	0	0	0	805.215	506.309	809.186	0.989	0.995093	0.0931	1.59036	0.203	0.625702
10108	9936	Hypothetical	SS		scaffold_2	+	52670	53802	4	1.3235	5	1.138	4	0.31666	2	0.68808	4	4.7647	6	7.6622	1.826	2.185	3.819	0.472	0.478136	0.578	0.835698	0.582	0.572139																			0.93469	0.76062
117947	117775	Hypothetical	SS	6 homologs in Pc	scaffold_53	-	41355	41910	3	21.949	3	19.68	3	5.2515	2	6.9301	2	2.7659	3	5.4176	962.219	666.068	5656.97	0.0298	0.170094	0.329	1.44463	0.027	0.117743
256224	256052	Hypothetical	SS		scaffold_197	-	30854	32385	3	0.734	3	1.3194	3	0.23223	2	0.34883	1	0.33462	1	0.30742	186.621	348.79	360.863	0.189	0.517152	0.0265	0.535053	0.947	0.966544
20167	19995	Hypothetical	SS		scaffold_140	-	60458	61610	3	0.6039	2	0.27006	1	0.042586	2	0.40138	0	0	0	0	66.955	54.337	80.562	0.726	0.831099	0.515	1.23222	0.472	0.674474
97703	97531	Hypothetical			scaffold_1	-	458909	460472	3	0.43234	1	0.093874	2	0.10344	1	0.13952	0	0	0	0	400.598	241.174	261.809	0.149	1.53012	0.0121	1.66103	0.771	0.921183	2175	nucleic acid binding	IPR000504	RNA recognition motif, RNP-1	HMMPfam	PF00076	RRM_1	2	30,226,	100,300,	1.7e-15,1.9e-13								1.0351	1.6565
19972	19800	Hypothetical			scaffold_116	-	71796	72402	2	4.4363	3	4.9453	2	0.34996	3	11.12	0	0	0	0	908.797	1116.22	706.056	0.331	1.28715	0.26	0.814171	0.157	1.58093	2700	subtilase activity	IPR010259	Proteinase inhibitor I9, subtilisin propeptide	HMMPfam	PF05922	Subtilisin_N	1	3,	76,	3.1e-05
34634	34462	Hypothetical	SS		scaffold_29	-	144443	146362	2	0.5193	2	0.17088	1	0.027523	3	0.5509	0	0	0	0	1380.5	1340.65	4526.64	0.017	0.304971	0.853	1.02972	0.0188	0.296169	3052	protein kinase CK2 activity
36173	36001	Hypothetical		poor model	scaffold_84	-	21279	25145	2	0.20178	4	0.22355	3	0.061385	3	0.15784	1	0.10297	1	0.094598	49.901	36.412	149.34	0.094	0.334144	0.163	1.37045	0.0507	0.243819	2246	actin binding	IPR010334	Dcp1-like decapping	HMMPfam	PF06058	DCP1	1	36,	148,	8.6e-08	3.-.-.-	Hydrolases.	\N	\N	\N	\N	\N
117991	117819	Hypothetical			scaffold_54	-	27407	27757	2	3.4961	2	2.4954	2	0.57764	2	5.1808	2	5.184	2	6.897	13.448	13.322	341.997	0.0139	0.039322	0.982	1.00946	0.0171	0.0389536
111074	110902	Hypothetical	SS, TMH		scaffold_180	+	45581	47728	2	0.34466	2	0.17939	2	0.082464	2	0.36563	0	0	0	0	110.588	83.99	85.725	0.565	1.29003	0.414	1.31668	0.949	0.979761	2632	pepsin A activity	IPR001461	Peptidase A1	FPrintScan	PR00792	PEPSIN	3	80,287,391,	100,298,406,	3.8e-09,3.8e-09,3.8e-09	3.4.23.25	Saccharopepsin.	Hydrolysis of proteins with broad specificity for peptide bonds. Cleaves -Leu-Leu-|-Val-Tyr- bond in a synthetic substrate. Does not act on esters of Tyr or Arg.	\N	\N	\N	\N
19768	19596	Hypothetical			scaffold_96	-	18699	19343	2	0.9651	2	0.68886	2	0.39997	1	0.44577	0	0	0	0	1936.6	899.787	2056.42	0.807	0.941734	0.00158	2.15228	0.0352	0.437551
130444	130272	Hypothetical			scaffold_189	-	8479	9217	2	0.63106	3	2.6609	3	0.68483	1	0.66946	1	0.61527	0	0	596.603	409.318	356.187	0.745	1.67497	0.42	1.45755	0.933	1.14917			IPR008997	Ricin B-related lectin	superfamily	SSF50370	Ricin B-like lectins	1	11,	147,	8e-06
19554	19382	Hypothetical			scaffold_75	+	18877	20640	2	0.53776	4	0.62737	6	0.30619	1	0.26233	8	3.7588	7	2.5246	325.492	589.517	69.541	0.0697	4.68058	0.105	0.552133	0.0318	8.47726																			0	1.6268
75336	75164	Hypothetical			scaffold_122	-	37117	37947	2	0.45512	0	0	2	0.10889	0	0	0	0	0	0	250.255	183.54	221.746	0.802	1.12857	0.165	1.36349	0.717	0.827704			IPR012336	Thioredoxin-like fold	superfamily	SSF52833	Thioredoxin-like	1	11,	201,	6e-10								1.0072	0.74614
19431	19259	Hypothetical			scaffold_66	-	89732	91106	1	0.32474	5	3.278	5	2.3321	2	1.2887	0	0	0	0	132.794	43.891	19.956	0.0805	6.65434	0.014	3.02554	0.336	2.19939																			0.85789	4.2166
428249	428077	Hypothetical	SS	7 Pc homologs	scaffold_64	-	123690	126428	1	0.073214	1	0.052258	0	0	2	0.15935	3	0.49643	3	0.45609	8.92	12.743	10.06	0.731	0.88668	0.0654	0.699992	0.513	1.2667			IPR000073	Alpha/beta hydrolase fold-1	HMMPfam	PF00561	Abhydrolase_1	1	122,	242,	7.5e-11
19856	19684	Hypothetical			scaffold_104	-	71032	71923	1	5.629	2	1.5174	2	0.33507	1	1.4856	1	3.007	3	2.7627	787.056	798.629	565.698	0.2	1.3913	0.964	0.985509	0.323	1.41176
38094	37922	Hypothetical			scaffold_243	-	3340	4143	1	0.26798	4	1.011	3	0.23105	1	0.28429	0	0	0	0	6.824	13.468	221.978	0.12	0.0307418	0.0993	0.506683	0.167	0.0606727
222236	222064	Hypothetical			scaffold_160	+	22808	24082	1	0.2457	1	0.17537	2	0.12777	1	0.26065	0	0	0	0	35.398	12.52	614.754	0.0923	0.0575808	0.241	2.82732	0.0298	0.0203659
121840	121668	Hypothetical			scaffold_183	-	51304	51904	1	0.28853	2	0.45386	0	0	0	0	2	3.3439	5	15.054	13.062	21.029	9.118	0.413	1.43255	0.0408	0.621142	0.0994	2.30632			IPR008997	Ricin B-related lectin	superfamily	SSF50370	Ricin B-like lectins	1	2,	131,	0.0016
107392	107220	Hypothetical			scaffold_85	-	89050	90105	1	0.22808	2	0.35182	1	0.054571	0	0	1	0.48975	1	0.44995	494.96	637.682	304.688	0.153	1.62448	0.287	0.776186	0.064	2.0929
62769	62597	Hypothetical	SS		scaffold_4	-	305744	307412	0	0	0	0	0	0	6	0.98301	9	3.4295	11	6.4409	12.234	16.336	8.259	0.127	1.48129	0.105	0.748898	0.0397	1.97796	2441	acid phosphatase activity	IPR000560	Histidine acid phosphatase	HMMPfam	PF00328	Acid_phosphat_A	1	80,	420,	5e-22	3.1.3.2	Acid phosphatase.	An orthophosphoric monoester + H(2)O = an alcohol + phosphate.	\N	gamma-Hexachlorocyclohexane degradation	Biodegradation of Xenobiotics	METABOLIC
19655	19483	Hypothetical			scaffold_84	+	43271	45898	0	0	1	0.047536	6	0.15056	2	0.14463	0	0	0	0	93.057	330.08	10.85	0.0627	8.57668	0.054	0.281923	0.0103	30.4221																			0	0.4444
112585	112413	Hypothetical	SS		scaffold_265	-	20395	23579	0	0	11	0.75644	7	0.18191	2	0.13483	0	0	0	0	39.429	16.116	7.084	0.0754	5.56592	0.172	2.44657	0.383	2.27499	2290	catalytic activity	IPR014870	Region of unknown function DUF1793	HMMPfam	PF08760	DUF1793	1	522,	690,	8.8e-78								0.47229	1.6873
19544	19372	Hypothetical			scaffold_74	-	57167	57654	0	0	1	0.25809	1	0.33146	1	0.38359	3	2.9747	1	0.71332	228.651	117.128	120.266	0.695	1.90121	0.0704	1.95215	0.987	0.973908																			1.4836	2.1178
127941	127769	Hypothetical	TMHs		scaffold_64	+	51344	52884	0	0	1	0.10877	1	0.03646	1	0.16166	2	0.68963	2	0.63359	167.226	124.308	34.871	0.132	4.79556	0.275	1.34526	0.19	3.5648
130132	129960	Hypothetical	TMHs		scaffold_165	-	47793	52401	0	0	0	0	1	0.0072044	0	0	6	0.63394	4	0.24529	27.445	21.117	8.742	0.0209	3.13944	0.148	1.29966	0.0357	2.41558
495993	495821	Hypothetical	TMHs		scaffold_165	-	54144	58532	0	0	0	0	0	0	0	0	2	0.14053	2	0.12911	12.816	14.951	15.879	0.615	0.807104	0.312	0.8572	0.897	0.941558
111379	111207	Hypothetical			scaffold_193	+	27470	28088	0	0	2	0.666	1	0.097574	0	0	0	0	0	0	29.909	36.577	282.214	0.0289	0.10598	0.346	0.8177	0.0285	0.129607
120104	119932	Hypothetical		poor model	scaffold_110	+	6898	7167	0	0	1	0.61704	1	0.20684	0	0	2	4.8458	1	1.7054	14.857	20.98	10.804	0.679	1.37514	0.642	0.708151	0.442	1.94187
100169	99997	Hypothetical	SS		scaffold_10	+	314526	315210													162.606	33.309	29.941	0.0228	5.43088	0.00851	4.88174	0.793	1.11249			IPR005132	Rare lipoprotein A	HMMPfam	PF03330	DPBB_1	1	57,	134,	4.5e-05								9.0135	1.8498
269870	269698	Hypothetical	SS		scaffold_204	+	42424	44113													0.976	0.892	0.526	0.132	1.85551	0.847	1.09417	0.248	1.69582																			4.5182	1.3491
111146	110974	Hypothetical			scaffold_183	+	6241	7396													161.754	131.672	66.233	0.0365	2.4422	0.386	1.22846	0.0803	1.98801	2175	nucleic acid binding	IPR000504	RNA recognition motif, RNP-1	HMMPfam	PF00076	RRM_1	1	8,	72,	6.7e-09								3.5035	2.6323
85547	85375	Hypothetical			scaffold_20	-	68909	69733													134.242	115.435	220.7	0.439	0.608256	0.269	1.16292	0.317	0.52304	23441	phenylpyruvate tautomerase activity	IPR001398	Macrophage migration inhibitory factor	BlastProDom	PD004816	Q698K0_EEEEE_Q698K0;	1	15,	114,	1e-09	5.3.2.1	Phenylpyruvate tautomerase.	Keto-phenylpyruvate = enol-phenylpyruvate.	\N	Phenylalanine metabolism	Amino Acid Metabolism	METABOLIC	2.0377	2.0377
92134	91962	Hypothetical	DUF124		scaffold_102	-	64381	65345													50.51	31.739	10.813	0.00219	4.67123	0.21	1.59142	0.0598	2.93526			IPR002838	Protein of unknown function DUF124	HMMPfam	PF01987	DUF124	1	27,	240,	4.4e-60								1.9543	3.2391
67539	67367	Hypothetical			scaffold_28	+	170193	171460													111.861	210.752	153.235	0.461	0.729996	0.351	0.530771	0.716	1.37535	2290	catalytic activity	IPR013149	Alcohol dehydrogenase, zinc-binding	HMMPfam	PF00107	ADH_zinc_N	1	160,	311,	1.7e-15	1.6.5.5	NADPH:quinone reductase.	NADPH + quinone = NADP(+) + semiquinone.	Zinc.	\N	\N	\N	1.7877	1.3498
105470	105298	Hypothetical			scaffold_55	-	60090	61052													12.97	6.792	6.501	0.0871	1.99508	0.0789	1.9096	0.919	1.04476			IPR002818	ThiJ/PfpI	HMMPfam	PF01965	DJ-1_PfpI	1	63,	224,	4.5e-25								1.5262	3.29
113336	113164	Hypothetical	cyanamide hydratase-like		scaffold_406	+	5271	6224													315.538	105.271	77.934	0.034	4.04878	0.0074	2.99739	0.457	1.35077	11118	cyanamide hydratase activity	IPR006674	Metal-dependent phosphohydrolase, HD region, subdomain	HMMPfam	PF01966	HD	1	67,	177,	1.5e-08	4.2.1.69	Cyanamide hydratase.	Urea = cyanamide + H(2)O.	\N	\N	\N	\N	0.94361	0.55742
94835	94663	Hypothetical		probable monooxygenase	scaffold_174	-	35236	37841													339.096	155.31	60.989	0.0733	5.55995	0.02	2.18335	0.199	2.54652	4283	electron transport	IPR001327	Pyridine nucleotide-disulphide oxidoreductase, NAD-binding region	BlastProDom	PD000139	Q9LLN1_ORYSA_Q9LLN1;	1	322,	387,	7e-09	1.14.13.8	Dimethylaniline monooxygenase (N-oxide forming).	N,N-dimethylaniline + NADPH + O(2) = N,N-dimethylaniline N-oxide + NADP(+) + H(2)O.	FAD.	\N	\N	\N	0.76738	0.68547
30486	30314	Hypothetical			scaffold_72	+	67322	68256													3507.38	3234.43	173.49	0.0754	20.2166	0.865	1.08439	0.0684	18.6433																			0.34605	3.4188
36024	35852	Hypothetical		108aa	scaffold_76	+	95113	95771													365.85	428.797	47.838	0.157	7.64769	0.705	0.853201	0.126	8.96352			IPR008462	CsbD-like	superfamily	SSF69047	Hypothetical protein YjbJ	2	8,56,	51,104,	0.013,0.0075								0.29979	7.147
85097	84925	Hypothetical			scaffold_17	-	21901	24167													174.847	152.645	50.779	0.0168	3.44329	0.549	1.14545	0.0352	3.00607			IPR001849	Pleckstrin-like	HMMPfam	PF00169	PH	1	308,	427,	1.1e-08								0.27485	1.175
18809	18637	Hypothetical			scaffold_29	+	180462	182617													249.002	215.725	116.36	0.0328	2.13993	0.288	1.15426	0.0437	1.85394			IPR000313	PWWP	HMMPfam	PF00855	PWWP	1	14,	97,	2.4e-13								0.13991	0.38732
130505	130333	Hypothetical			scaffold_195	+	16174	19167													193.633	171.921	11.833	0.0739	16.3638	0.561	1.12629	0.0675	14.5289																			0.10622	2.2472
128183	128011	Hypothetical			scaffold_71	+	101375	103825													223.678	276.842	29.376	0.102	7.61431	0.608	0.807963	0.0742	9.42409																			0.10345	0.80518
127838	127666	Hypothetical		Zn finger	scaffold_61	+	32129	33594													167.472	144.927	16.164	0.0404	10.3608	0.569	1.15556	0.0407	8.96604	2175	nucleic acid binding	IPR000571	Zinc finger, CCCH-type	HMMPfam	PF00642	zf-CCCH	1	176,	201,	0.033								0.078612	0.45991
127834	127662	Hypothetical			scaffold_61	-	15873	18568													187.198	189.382	15.742	0.0656	11.8916	0.982	0.988468	0.0607	12.0304																			0.073757	1.3489
127173	127001	Hypothetical			scaffold_42	+	129863	130760													766.378	1116.97	34.039	0.058	22.5147	0.498	0.686121	0.0425	32.8145																			0	2.1842
77453	77281	Hypothetical	126aa		scaffold_170	-	21658	22210													157.58	339.141	4.616	0.00309	34.1378	0.0432	0.464644	0.00169	73.4708																			0	1.9875
20248	20076	Hypothetical			scaffold_150	-	10795	11754													192.159	280.553	25.242	0.187	7.61267	0.547	0.684929	0.131	11.1145																			0	1.3261
444426	444254	Hypothetical			scaffold_72	-	33125	34661													53.935	34.186	12.959	0.0393	4.16197	0.444	1.57769	0.183	2.63801			IPR009053	Prefoldin	superfamily	SSF46579	Prefoldin	1	5,	97,	9.2e-05								0	0.73568
127189	127017	Hypothetical	5'TMHs		scaffold_43	-	54341	55673													147.476	154.22	20.3	0.0236	7.26483	0.934	0.95627	0.0326	7.59704																			0	0.45146
74426	74254	Hypothetical			scaffold_105	+	10	683													------	------	------	NaN	#VALUE!	NaN	#VALUE!	NaN	#VALUE!	21401	protein dimerization activity	IPR008906	HAT dimerisation	HMMPfam	PF05699	hATC	1	85,	165,	8.3e-08
67951	67779	Hypothetical			scaffold_30	+	133106	133327													5.519	13.883	5.458	0.983	1.01118	0.014	0.397537	0.0777	2.54361	21401	protein dimerization activity	IPR008906	HAT dimerisation	HMMPfam	PF05699	hATC	1	7,	54,	3.8e-10
30813	30641	Hypothetical			scaffold_89	-	67448	68858													53.607	40.244	157.293	0.0133	0.34081	0.148	1.33205	0.00819	0.255854	20001	gibberellin 2-beta-dioxygenase activity	IPR005123	2OG-Fe(II) oxygenase	HMMPfam	PF03171	2OG-FeII_Oxy	1	200,	283,	6e-19	1.14.11.13	Gibberellin 2-beta-dioxygenase.	Gibberellin 1 + 2-oxoglutarate + O(2) = 2-beta-hydroxygibberellin 1 + succinate + CO(2).	\N	\N	\N	\N
193965	193793	Hypothetical	SS		scaffold_137	+	11701	13406													15.021	13.673	370.14	0.00908	0.0405819	0.551	1.09859	0.00763	0.0369401	18471	licheninase activity										3.2.1.73	Licheninase.	Hydrolysis of 1,4-beta-D-glycosidic linkages in beta-D-glucans containing 1,3- and 1,4-bonds.	\N	\N	\N	\N
75741	75569	Hypothetical			scaffold_130	+	61991	63182													25.041	32.299	7.264	0.0351	3.44727	0.164	0.775287	0.0192	4.44645	18285	3'-tRNA processing endoribonuclease activity
127436	127264	Hypothetical			scaffold_49	-	13415	15862													22.956	8.643	11.44	0.273	2.00664	0.00746	2.65602	0.647	0.755507	14021	phosphopantetheine binding	IPR006162	Phosphopantetheine attachment site	ScanRegExp	PS00012	PHOSPHOPANTETHEINE	1	7,	22,	NA	6.3.2.-	Acid--D-amino-acid ligases (peptide synthases).	\N	\N	Tryptophan metabolism	Amino Acid Metabolism	METABOLIC
18320	18148	Hypothetical			scaffold_12	+	241120	242536													49.235	21.856	17.103	0.0454	2.87873	0.0192	2.2527	0.521	1.2779	13917	heat shock protein binding	IPR001623	Heat shock protein DnaJ, N-terminal	HMMPfam	PF00226	DnaJ	1	101,	165,	9.1e-24
424440	424268	Hypothetical	SS		scaffold_62	-	57392	58122													1.318	3.23	8.97	0.107	0.146934	0.0015	0.40805	0.301	0.360089	10166	cell wall catabolic process	IPR002482	Peptidoglycan-binding LysM	HMMPfam	PF01476	LysM	2	31,86,	76,131,	0.0022,3e-06
126889	126717	Hypothetical			scaffold_36	-	73747	77077													49.219	17.992	6.017	0.00318	8.17999	0.00845	2.7356	0.0207	2.99019	10026	carboxy-lyase activity	IPR002129	Pyridoxal phosphate-dependent decarboxylase	HMMPfam	PF00282	Pyridoxal_deC	1	217,	309,	3.9e-08
79478	79306	Hypothetical	5' TMH	Possible metallo-dependent hydrolase	scaffold_248	-	86	2075													3.738	0.978	5.98	0.135	0.625084	0.00741	3.82209	0.012	0.163545	10005	hydrolase activity, acting on carbon-nitrogen (but not peptide) bonds	IPR013108	Amidohydrolase 3	HMMPfam	PF07969	Amidohydro_3	1	454,	485,	2.5e-07
79340	79168	Hypothetical	SS or 5'TMH		scaffold_241	-	5516	6850													50.673	23.097	10.632	0.00216	4.76608	0.00278	2.19392	0.0364	2.1724	9985	hydrolase activity	IPR004843	Metallophosphoesterase	HMMPfam	PF00149	Metallophos	1	77,	319,	0.00034
111226	111054	Hypothetical		possible phosphoesterase	scaffold_186	-	37200	38980													39.479	41.618	3.99	0.0273	9.89449	0.797	0.948604	0.0232	10.4306	9985	hydrolase activity	IPR001667	Phosphoesterase, RecJ-like	HMMPfam	PF01368	DHH	1	56,	198,	9.2e-05
100358	100186	Hypothetical			scaffold_11	-	257736	258717													45.524	20.181	17.044	0.101	2.67097	0.0139	2.25579	0.72	1.18405	9985	hydrolase activity	IPR000086	NUDIX hydrolase, core	HMMPfam	PF00293	NUDIX	1	10,	129,	1.5e-15
115541	115369	Hypothetical			scaffold_16	-	216886	217147													10.326	17.495	5.113	0.0498	2.01956	0.147	0.590226	0.0373	3.42167	9710	oxidoreductase activity	IPR006094	FAD linked oxidase, N-terminal	HMMPfam	PF01565	FAD_binding_4	1	39,	58,	0.00029
96659	96487	Hypothetical		possible oxidoreductase	scaffold_280	-	16592	17915													113.761	100.942	9.719	0.0301	11.705	0.541	1.12699	0.0296	10.386	9710	oxidoreductase activity	IPR001395	Aldo/keto reductase	BlastProDom	PD000288	Q9HGY0_ZYGRO_Q9HGY0;	1	1,	274,	1e-50	1.1.1.-	With NAD(+) or NADP(+) as acceptor.	\N	\N	Bile acid biosynthesis	Lipid Metabolism	METABOLIC
102327	102155	Hypothetical		possible arabinose dehydrogenase	scaffold_24	-	95073	96487													54.672	55.957	18.882	0.0114	2.89546	0.873	0.977036	0.0114	2.96351	9710	oxidoreductase activity	IPR001395	Aldo/keto reductase	BlastProDom	PD000288	Q6CIG5_EEEEE_Q6CIG5;	1	52,	233,	1e-28
38482	38310	Hypothetical		FAD OR	scaffold_361	-	5706	7041													65.105	46.845	4.097	0.0374	15.8909	0.509	1.3898	0.0404	11.434	9710	oxidoreductase activity	IPR001327	Pyridine nucleotide-disulphide oxidoreductase, NAD-binding region	HMMPfam	PF00070	Pyr_redox	1	131,	222,	7.9e-08
124869	124697	Hypothetical		possible oxidoreductase	scaffold_8	-	45511	47180													29.962	104.699	7.847	0.049	3.81827	0.195	0.286173	0.0628	13.3426	9710	oxidoreductase activity	IPR000683	Oxidoreductase, N-terminal	HMMPfam	PF01408	GFO_IDH_MocA	1	28,	151,	6.4e-32	1.3.1.20	Trans-1,2-dihydrobenzene-1,2-diol dehydrogenase.	Trans-1,2-dihydrobenzene-1,2-diol + NADP(+) = catechol + NADPH.	\N	\N	\N	\N
19867	19695	Hypothetical		Like-Sm ribonucleoprotein, core	scaffold_105	-	51900	52947													245.152	118.178	122.185	0.122	2.0064	0.0163	2.07443	0.941	0.967205	9367	mRNA metabolic process	IPR006649	Like-Sm ribonucleoprotein, eukaryotic and archaea-type, core	BlastProDom	PD020287	Q9SUN5_ARATH_Q9SUN5;	1	6,	50,	3e-11
68816	68644	Hypothetical	TMHs	DUF887	scaffold_36	-	161844	163356													247.28	133.836	89.209	0.0103	2.77192	0.0142	1.84763	0.145	1.50025	9321	integral to membrane	IPR010283	Protein of unknown function DUF887, TLC-like	HMMPfam	PF05967	DUF887	1	37,	277,	3.9e-27
458364	458192	Hypothetical	TMHs		scaffold_8	+	283554	285253													14.401	17.097	2.835	0.025	5.07972	0.637	0.842312	0.0323	6.03069	9321	integral to membrane	IPR004776	Auxin efflux carrier	HMMPfam	PF03547	Mem_trans	1	15,	422,	9e-19
101046	100874	Hypothetical	TMHs		scaffold_15	+	219246	220306													294.962	415.427	62.958	0.0183	4.68506	0.0718	0.710021	0.00922	6.59848	9321	integral to membrane	IPR004307	TspO/MBR-related protein	BlastProDom	PD006774	BZRP_RAT_P16257;	1	97,	167,	5e-06
90811	90639	Hypothetical	TMHs		scaffold_76	-	103476	104614													24.975	8.952	10.885	0.0449	2.29444	0.00139	2.78988	0.475	0.822416	9321	integral to membrane	IPR001708	60 kDa inner membrane insertion protein	HMMPfam	PF02096	60KD_IMP	1	1,	170,	1.2e-05
76274	76102	Hypothetical	TMHs		scaffold_141	+	34363	35700													244.406	116.569	130.911	0.39	1.86696	0.018	2.09666	0.881	0.890445	9321	integral to membrane	IPR000301	CD9/CD37/CD63 antigen	HMMPfam	PF00335	Tetraspannin	1	109,	291,	3.8e-06
19786	19614	Hypothetical	TMHs		scaffold_97	-	46744	47996													50.589	21.922	13.27	0.196	3.81228	0.0269	2.30768	0.585	1.652	9320	membrane	IPR000791	GPR1/FUN34/yaaH	BlastProDom	PD010188	Q756R2_ASHGO_Q756R2;	1	87,	143,	9e-14
96854	96682	Hypothetical			scaffold_300	-	2062	2483													263.676	296.501	345.71	0.603	0.762709	0.591	0.889292	0.788	0.857658	9292	ATP synthesis coupled proton transport	IPR006995	ATPase, F0 complex, subunit J	HMMPfam	PF04911	ATP-synt_J	1	5,	56,	1.5e-14	3.6.3.14	H(+)-transporting two-sector ATPase.	ATP + H(2)O + H(+)(In) = ADP + phosphate + H(+)(Out).	\N	ATP synthesis	Energy Metabolism	METABOLIC
124448	124276	Hypothetical	TMHs		scaffold_4	+	15518	19285													37.182	35.667	21.852	0.182	1.70154	0.846	1.04248	0.203	1.63221	8851	tetracycline:hydrogen antiporter activity	IPR001958	Tetracycline resistance protein, TetA	FPrintScan	PR01035	TCRTETA	4	146,177,204,234,	165,201,225,256,	2.8e-05,2.8e-05,2.8e-05,2.8e-05
65011	64839	Hypothetical	TMH, IVS		scaffold_13	-	238193	240568													237.746	176.087	45.78	0.0105	5.19323	0.223	1.35016	0.0298	3.84637	7744	FMN binding	IPR011576	Pyridoxamine 5'-phosphate oxidase-related, FMN-binding core	HMMPfam	PF01243	Pyridox_oxidase	1	8,	105,	0.0024
180218	180046	Hypothetical		DUF28	scaffold_125	+	10422	11764													7.778	3.272	6.089	0.308	1.27739	0.00981	2.37714	0.0882	0.537362	6494	glucose-1-phosphate adenylyltransferase activity	IPR002876	Protein of unknown function DUF28	BlastProDom	PD004323	Y474_TREPA_O83487;	1	36,	192,	1e-20	2.7.7.27	Glucose-1-phosphate adenylyltransferase.	ATP + alpha-D-glucose 1-phosphate = diphosphate + ADP-glucose.	\N	Starch and sucrose metabolism	Metabolism of Complex Carbohydrates	METABOLIC
139821	139649	Hypothetical			scaffold_10	-	47330	48750													42.533	17.305	78.442	0.0923	0.542222	0.0139	2.45784	0.00649	0.220609	6387	UDP-N-acetylmuramoylalanyl-D-glutamyl-2,6-diaminopimelate-D-alanyl-D-alanine ligase activity	IPR013922	Cyclin-related 2	HMMPfam	PF08613	Cyclin	1	112,	143,	7.5e-06	6.3.2.-	Acid--D-amino-acid ligases (peptide synthases).	\N	\N	Tryptophan metabolism	Amino Acid Metabolism	METABOLIC
23198	23026	Hypothetical			scaffold_31	+	117365	119464													6.91	2.594	4.755	0.537	1.45321	0.00923	2.66384	0.329	0.545531	6387	UDP-N-acetylmuramoylalanyl-D-glutamyl-2,6-diaminopimelate-D-alanyl-D-alanine ligase activity	IPR000408	Regulator of chromosome condensation, RCC1	HMMPfam	PF00415	RCC1	1	367,	425,	4.7e-06	6.3.2.-	Acid--D-amino-acid ligases (peptide synthases).	\N	\N	Tryptophan metabolism	Amino Acid Metabolism	METABOLIC
120230	120058	Hypothetical			scaffold_114	-	22679	24464													84.336	21.673	6.043	0.00893	13.956	0.000424	3.89129	0.0556	3.58646	6387	UDP-N-acetylmuramoylalanyl-D-glutamyl-2,6-diaminopimelate-D-alanyl-D-alanine ligase activity										6.3.2.-	Acid--D-amino-acid ligases (peptide synthases).	\N	\N	Tryptophan metabolism	Amino Acid Metabolism	METABOLIC
76075	75903	Hypothetical	TMHs		scaffold_136	-	65688	67034													57.517	27.913	76.552	0.332	0.751345	0.0153	2.06058	0.024	0.364628	6387	UDP-N-acetylmuramoylalanyl-D-glutamyl-2,6-diaminopimelate-D-alanyl-D-alanine ligase activity										6.3.2.-	Acid--D-amino-acid ligases (peptide synthases).	\N	\N	Tryptophan metabolism	Amino Acid Metabolism	METABOLIC
264685	264513	Hypothetical			scaffold_20	+	2921	6010													20.168	9.589	10.498	0.0609	1.92113	0.0168	2.10324	0.746	0.913412	6387	UDP-N-acetylmuramoylalanyl-D-glutamyl-2,6-diaminopimelate-D-alanyl-D-alanine ligase activity										6.3.2.-	Acid--D-amino-acid ligases (peptide synthases).	\N	\N	Tryptophan metabolism	Amino Acid Metabolism	METABOLIC
125333	125161	Hypothetical			scaffold_12	+	181014	183989													54.5	43.708	15.497	0.0289	3.51681	0.179	1.24691	0.0352	2.82042	6387	UDP-N-acetylmuramoylalanyl-D-glutamyl-2,6-diaminopimelate-D-alanyl-D-alanine ligase activity										6.3.2.-	Acid--D-amino-acid ligases (peptide synthases).	\N	\N	Tryptophan metabolism	Amino Acid Metabolism	METABOLIC
126196	126024	Hypothetical			scaffold_24	+	192612	196005													31.992	27.164	11.051	0.0414	2.89494	0.326	1.17774	0.0512	2.45806	6387	UDP-N-acetylmuramoylalanyl-D-glutamyl-2,6-diaminopimelate-D-alanyl-D-alanine ligase activity										6.3.2.-	Acid--D-amino-acid ligases (peptide synthases).	\N	\N	Tryptophan metabolism	Amino Acid Metabolism	METABOLIC
16108	15936	Hypothetical		Zn finger	scaffold_184	+	45364	46368													13.291	10.458	0.815	0.0546	16.308	0.26	1.27089	0.0522	12.8319	5939	zinc ion binding	IPR002893	Zinc finger, MYND-type	HMMPfam	PF01753	zf-MYND	1	297,	333,	1.1e-05
119668	119496	Hypothetical			scaffold_96	-	9729	11734													34.228	28.535	11.089	0.0379	3.08666	0.343	1.19951	0.0462	2.57327	5939	zinc ion binding	IPR002893	Zinc finger, MYND-type	HMMPfam	PF01753	zf-MYND	1	309,	349,	5.6e-09
22910	22738	Hypothetical			scaffold_25	-	180839	181476													106.615	108.209	36.294	0.0491	2.93754	0.935	0.985269	0.0425	2.98146	5939	zinc ion binding	IPR002893	Zinc finger, MYND-type	HMMPfam	PF01753	zf-MYND	1	57,	102,	4.3e-06
329407	329235	Hypothetical		poor model	scaffold_3	+	184607	185721													32.682	36.86	9.405	0.0293	3.47496	0.354	0.886652	0.0203	3.91919	5939	zinc ion binding	IPR002893	Zinc finger, MYND-type	HMMPfam	PF01753	zf-MYND	1	138,	178,	5e-05
400139	399967	Hypothetical			scaffold_5	-	289212	291798													13.772	18.297	4.9	0.0492	2.81061	0.14	0.752692	0.025	3.73408	5939	zinc ion binding	IPR002893	Zinc finger, MYND-type	HMMPfam	PF01753	zf-MYND	1	671,	709,	1.2e-08
124694	124522	Hypothetical			scaffold_6	+	131825	132700													87.557	164.394	12.082	0.0137	7.2469	0.113	0.532605	0.00949	13.6065	5939	zinc ion binding	IPR002893	Zinc finger, MYND-type	HMMPfam	PF01753	zf-MYND	1	21,	62,	6.8e-09
77701	77529	Hypothetical			scaffold_177	+	33647	34991													30.823	23.932	10.139	0.0414	3.04004	0.148	1.28794	0.0568	2.36039	5939	zinc ion binding	IPR002867	Zinc finger, C6HC-type	HMMSmart	SM00647	no description	2	168,239,	232,295,	0.021,0.0021
90020	89848	Hypothetical	related to cytidine deaminase		scaffold_64	-	65104	66015													50.959	17.149	31.644	0.292	1.61038	0.0136	2.97154	0.242	0.541935	5939	zinc ion binding	IPR002125	CMP/dCMP deaminase, zinc-binding	HMMPfam	PF00383	dCMP_cyt_deam_1	1	10,	115,	9.7e-28	3.5.4.5	Cytidine deaminase.	Cytidine + H(2)O = uridine + NH(3).	\N	Pyrimidine metabolism	Nucleotide Metabolism	METABOLIC
36660	36488	Hypothetical			scaffold_109	+	4910	6436													81.628	38.482	60.157	0.488	1.35692	0.0392	2.1212	0.322	0.639693	5939	zinc ion binding	IPR000306	Zinc finger, FYVE-type	HMMPfam	PF01363	FYVE	1	88,	177,	2.9e-19	2.7.1.68	1-phosphatidylinositol-4-phosphate kinase.	ATP + 1-phosphatidyl-1D-myo-inositol 4-monophosphate = ADP + 1-phosphatidyl-1D-myo-inositol 4,5-bisphosphate.	\N	Inositol phosphate metabolism	Metabolism of Complex Lipids	METABOLIC
125474	125302	Hypothetical		possible methyltransferase	scaffold_14	+	143677	144727													4.54	10.035	3.869	0.638	1.17343	0.0203	0.452417	0.0474	2.59369	5849	O-methyltransferase activity	IPR002935	O-methyltransferase, family 3	HMMPfam	PF01596	Methyltransf_3	1	87,	276,	1.4e-20	2.1.1.104	Caffeoyl-CoA O-methyltransferase.	S-adenosyl-L-methionine + caffeoyl-CoA = S-adenosyl-L-homocysteine + feruloyl-CoA.	\N	Flavonoids, stilbene and lignin biosynthesis	Biosynthesis of Secondary Metabolites	METABOLIC
95110	94938	Hypothetical	IVS	Possible methyl transferase	scaffold_185	+	8685	11605													19.111	16.88	6.01	0.0242	3.17987	0.418	1.13217	0.0336	2.80865	5849	O-methyltransferase activity	IPR001077	O-methyltransferase, family 2	HMMPfam	PF00891	Methyltransf_2	1	241,	426,	7.6e-18
328367	328195	Hypothetical			scaffold_3	-	102629	104442													16.14	18.938	4.531	0.041	3.56213	0.321	0.852255	0.0261	4.17965	5830	metabolic process	IPR013216	Methyltransferase type 11	HMMPfam	PF08241	Methyltransf_11	1	96,	188,	6e-11
99413	99241	Hypothetical		Possible methyl transferase	scaffold_7	-	296214	298463													74.385	110.245	16.326	0.0304	4.55623	0.147	0.674724	0.0203	6.75273	5830	metabolic process	IPR013216	Methyltransferase type 11	HMMPfam	PF08241	Methyltransf_11	1	92,	191,	6.9e-13
479860	479688	Hypothetical	SS		scaffold_92	-	30907	32488													14.186	9.945	4.965	0.0156	2.8572	0.0451	1.42645	0.0375	2.00302	5830	metabolic process	IPR013094	Alpha/beta hydrolase fold-3	HMMPfam	PF07859	Abhydrolase_3	1	181,	367,	6.7e-24
18204	18032	Hypothetical		140 aa, Possible Glutathione-dependent formaldehyde-activating	scaffold_10	+	103669	104185													16.288	48.259	30.987	0.132	0.52564	0.00323	0.337512	0.202	1.5574	5830	metabolic process	IPR006913	Glutathione-dependent formaldehyde-activating, GFA	HMMPfam	PF04828	DUF636	1	51,	132,	9e-06
117783	117611	Hypothetical		Possible SDR	scaffold_49	+	144093	144910													6.437	15.871	0.651	0.0166	9.88786	0.132	0.405583	0.00308	24.3794	5830	metabolic process	IPR002198	Short-chain dehydrogenase/reductase SDR	FPrintScan	PR00080	SDRFAMILY	3	83,136,157,	94,144,176,	2.1e-10,2.1e-10,2.1e-10	1.1.1.101	Acylglycerone-phosphate reductase.	1-palmitoylglycerol 3-phosphate + NADP(+) = palmitoylglycerone phosphate + NADPH.	\N	\N	\N	\N
506496	506324	Hypothetical			scaffold_34	+	131930	133024													31	9.353	8.631	0.128	3.5917	0.0419	3.31444	0.885	1.08365	5830	metabolic process	IPR002198	Short-chain dehydrogenase/reductase SDR	FPrintScan	PR00080	SDRFAMILY	3	108,163,183,	119,171,202,	8.9e-07,8.9e-07,8.9e-07	1.1.1.100	3-oxoacyl-[acyl-carrier protein] reductase.	(3R)-3-hydroxyacyl-[acyl-carrier protein] + NADP(+) = 3-oxoacyl- [acyl-carrier protein] + NADPH.	\N	Fatty acid biosynthesis (path 1)	Lipid Metabolism	METABOLIC
76456	76284	Hypothetical		possible oxidoreductase	scaffold_144	+	15762	16850													25.357	25.124	3.812	0.0208	6.65189	0.988	1.00927	0.0412	6.59077	5830	metabolic process	IPR002198	Short-chain dehydrogenase/reductase SDR	FPrintScan	PR00080	SDRFAMILY	3	91,169,191,	102,177,210,	1.4e-05,1.4e-05,1.4e-05	1.1.1.100	3-oxoacyl-[acyl-carrier protein] reductase.	(3R)-3-hydroxyacyl-[acyl-carrier protein] + NADP(+) = 3-oxoacyl- [acyl-carrier protein] + NADPH.	\N	Fatty acid biosynthesis (path 1)	Lipid Metabolism	METABOLIC
26138	25966	Hypothetical	TMH	possible oxidoreductase	scaffold_166	-	2428	3472													11.478	11.912	3.541	0.0317	3.24146	0.84	0.963566	0.0219	3.36402	5830	metabolic process	IPR002198	Short-chain dehydrogenase/reductase SDR	FPrintScan	PR00080	SDRFAMILY	3	75,130,150,	86,138,169,	1.5e-13,1.5e-13,1.5e-13	1.-.-.-	Oxidoreductases.	\N	\N	\N	\N	\N
68237	68065	Hypothetical		possible oxidoreductase	scaffold_32	+	39239	40478													39.207	76.009	5.865	0.0119	6.68491	0.593	0.51582	0.113	12.9598	5830	metabolic process	IPR002198	Short-chain dehydrogenase/reductase SDR	FPrintScan	PR00080	SDRFAMILY	3	75,128,148,	86,136,167,	5.8e-08,5.8e-08,5.8e-08	1.-.-.-	Oxidoreductases.	\N	\N	\N	\N	\N
22345	22173	Hypothetical	TMHs	>3000aa	scaffold_15	+	250564	263065													68.293	110.581	27.423	0.0242	2.49035	0.0214	0.617583	0.00492	4.03242	5830	metabolic process	IPR001917	Aminotransferase, class-II, pyridoxal-phosphate binding site	ScanRegExp	PS00599	AA_TRANSFER_CLASS_2	1	124,	133,	NA
125018	124846	Hypothetical			scaffold_9	-	178073	179381													21.966	24.491	22.597	0.91	0.972076	0.461	0.896901	0.769	1.08382	5830	metabolic process	IPR000583	Glutamine amidotransferase, class-II	ScanRegExp	PS00443	GATASE_TYPE_II	1	1,	16,	NA
70860	70688	Hypothetical		Possible aminotransferase	scaffold_56	+	126343	128379													51.414	54.622	9.767	0.00574	5.26405	0.724	0.941269	0.00787	5.59251	5830	metabolic process	IPR000192	Aminotransferase, class V/Cysteine desulphurase	HMMPfam	PF00266	Aminotran_5	1	57,	464,	4.2e-09
97582	97410	Hypothetical			scaffold_1	+	284405	284865													13.774	5.495	11.233	0.65	1.22621	0.0338	2.50664	0.17	0.489184	5765	N-acetyltransferase activity	IPR000182	GCN5-related N-acetyltransferase	ProfileScan	PS51186	GNAT	1	13,	136,	9.771
155764	155592	Hypothetical			scaffold_11	-	583	2134													1.243	0.838	2.548	0.24	0.487834	0.462	1.48329	0.19	0.328885	5765	N-acetyltransferase activity	IPR000182	GCN5-related N-acetyltransferase	HMMPfam	PF00583	Acetyltransf_1	1	246,	325,	1.4e-09
17795	17623	Hypothetical			scaffold_2	-	286752	288117													24.507	49.745	54.277	0.029	0.451517	0.00916	0.492653	0.727	0.916502	5765	N-acetyltransferase activity	IPR000182	GCN5-related N-acetyltransferase	HMMPfam	PF00583	Acetyltransf_1	1	234,	312,	1.7e-08
115945	115773	Hypothetical			scaffold_21	+	175744	176802													34.971	50.549	6.358	0.0333	5.50031	0.262	0.691824	0.0248	7.95046	5160	mitosis	IPR003511	DNA-binding HORMA	HMMPfam	PF02301	HORMA	1	6,	212,	2.9e-24
370711	370539	Hypothetical		distantly related to vacuolar sorting proteins	scaffold_4	+	246238	248570													11.059	2.261	6.009	0.402	1.84041	0.0014	4.8912	0.209	0.376269	4994	intracellular protein transport	IPR002014	VHS	BlastProDom	PD003686	Q6CFT4_EEEEE_Q6CFT4;	1	239,	332,	3e-05
322117	321945	Hypothetical			scaffold_289	+	3692	5356													44.914	43.802	4.505	0.0398	9.96981	0.907	1.02539	0.0328	9.72297	4925	regulation of nitrogen utilization	IPR008030	NmrA-like	HMMPfam	PF05368	NmrA	1	11,	262,	4.7e-28
21389	21217	Hypothetical			scaffold_4	+	181035	182418													40.591	70.781	7.646	0.00692	5.30879	0.0813	0.573473	0.0016	9.25726	4925	regulation of nitrogen utilization	IPR008030	NmrA-like	HMMPfam	PF05368	NmrA	1	7,	161,	8.7e-29
504143	503971	Hypothetical			scaffold_289	+	5656	7139													7.194	15.152	1.823	0.019	3.94624	0.0378	0.474789	0.00293	8.31157	4925	regulation of nitrogen utilization	IPR008030	NmrA-like	HMMPfam	PF05368	NmrA	1	12,	149,	3e-27
120656	120484	Hypothetical			scaffold_128	-	71487	73162													10.338	17.623	3.788	0.0144	2.72914	0.0304	0.58662	0.00494	4.65232	4639	proteolysis	IPR011600	Peptidase C14, caspase catalytic	HMMPfam	PF00656	Peptidase_C14	1	67,	127,	9.6e-10
162455	162283	Hypothetical		possible metacaspase	scaffold_111	+	50161	52544													5.235	10.802	2.069	0.0472	2.53021	0.0445	0.484632	0.0144	5.22088	4639	proteolysis	IPR011600	Peptidase C14, caspase catalytic	HMMPfam	PF00656	Peptidase_C14	1	141,	311,	7e-15
115540	115368	Hypothetical			scaffold_16	-	211536	214232													15.691	22.933	5.434	0.0472	2.88756	0.024	0.684211	0.0209	4.22028	4598	protein modification process	IPR000626	Ubiquitin	FPrintScan	PR00348	UBIQUITIN	3	376,397,418,	396,417,439,	1.3e-17,1.3e-17,1.3e-17
63732	63560	Hypothetical			scaffold_8	-	289769	291270													5.277	3.775	3.904	0.423	1.35169	0.201	1.39788	0.938	0.966957	4443	base-excision repair	IPR003265	HhH-GPD	HMMPfam	PF00730	HhH-GPD	1	49,	206,	0.00023	3.2.2.21	DNA-3-methyladenine glycosylase II.	Hydrolysis of alkylated DNA, releasing 3-methyladenine, 3-methylguanine, 7-methylguanine, and 7-methyladenine.	\N	\N	\N	\N
126154	125982	Hypothetical		possible monooxygenase	scaffold_24	-	85096	87393													25.212	23.302	6.03	0.0342	4.18109	0.667	1.08197	0.0368	3.86434	4283	electron transport	IPR013027	FAD-dependent pyridine nucleotide-disulphide oxidoreductase	FPrintScan	PR00368	FADPNR	2	11,297,	33,304,	7.5e-06,7.5e-06	1.14.13.7	Phenol 2-monooxygenase.	Phenol + NADPH + O(2) = catechol + NADP(+) + H(2)O.	FAD.	gamma-Hexachlorocyclohexane degradation	Biodegradation of Xenobiotics	METABOLIC
104309	104137	Hypothetical		possible oxidoreductase	scaffold_40	+	164577	166587													38.809	37.704	8.212	0.0295	4.72589	0.835	1.02931	0.027	4.59133	4283	electron transport	IPR001433	Oxidoreductase FAD/NAD(P)-binding	HMMPfam	PF00175	NAD_binding_1	1	498,	619,	0.00086
127385	127213	Hypothetical	5'TMHs		scaffold_47	+	141968	144853													101.875	113.985	13.044	0.0374	7.8101	0.553	0.893758	0.0285	8.7385	4283	electron transport	IPR000759	Adrenodoxin reductase	FPrintScan	PR00419	ADXRDTASE	2	70,93,	92,106,	1.1e-05,1.1e-05	1.14.13.8	Dimethylaniline monooxygenase (N-oxide forming).	N,N-dimethylaniline + NADPH + O(2) = N,N-dimethylaniline N-oxide + NADP(+) + H(2)O.	FAD.	\N	\N	\N
34066	33894	Hypothetical			scaffold_18	-	10794	12251													42.363	15.736	46.594	0.732	0.909194	0.00192	2.69211	0.03	0.337726	4239	glycerol metabolic process	IPR004129	Glycerophosphoryl diester phosphodiesterase	HMMPfam	PF03009	GDPD	1	12,	245,	7.9e-31	3.1.4.46	Glycerophosphodiester phosphodiesterase.	A glycerophosphodiester + H(2)O = an alcohol + sn-glycerol 3-phosphate.	\N	Phospholipid degradation	Metabolism of Complex Lipids	METABOLIC
89949	89777	Hypothetical			scaffold_63	-	97154	98101													37.788	33.369	26.756	0.302	1.41232	0.383	1.13243	0.502	1.24716	3936	mitochondrial inner membrane presequence translocase complex	IPR007379	Mitochondrial import inner membrane translocase, subunit Tim44	HMMPfam	PF04280	Tim44	1	75,	228,	0.0033
103834	103662	Hypothetical			scaffold_36	-	47766	48269													56.623	20.796	56.239	0.976	1.00683	0.00131	2.72278	0.0231	0.369779	3931	mitochondrion	IPR006721	ATPase, F1 complex, epsilon subunit, mitochondrial	HMMPfam	PF04627	ATP-synt_Eps	1	1,	48,	2.4e-09
74220	74048	Hypothetical		66aa	scaffold_102	+	27584	27833													70.321	75.651	24.389	0.0226	2.88331	0.546	0.929545	0.0189	3.10185	3868	transcription factor TFIID complex	IPR003228	Transcription initiation factor TFIID	BlastProDom	PD012998	O13722_SCHPO_O13722;	1	2,	62,	8e-18
114765	114593	Hypothetical			scaffold_9	+	239225	240421													59.002	64.695	17.598	0.0443	3.35277	0.706	0.912002	0.0364	3.67627	3838	nucleus	IPR007018	MED6 mediator	HMMPfam	PF04934	MED6	1	55,	162,	1.5e-19
20124	19952	Hypothetical			scaffold_135	-	3201	4633													52.99	36.253	15.211	0.0451	3.48366	0.0413	1.46167	0.0801	2.38334	3838	nucleus	IPR001214	SET	HMMPfam	PF00856	SET	1	124,	168,	2.7e-05
72527	72355	Hypothetical			scaffold_76	+	13352	13887													25.846	7.486	13.706	0.156	1.88574	0.000491	3.45258	0.14	0.546184	3838	nucleus	IPR001092	Basic helix-loop-helix dimerisation region bHLH	HMMPfam	PF00010	HLH	1	10,	60,	1.4e-13
115032	114860	Hypothetical			scaffold_11	+	254672	255223													19.085	3.411	2.516	0.155	7.58545	0.00565	5.59513	0.813	1.35572	3838	nucleus	IPR001092	Basic helix-loop-helix dimerisation region bHLH	HMMPfam	PF00010	HLH	1	1,	85,	0.00013
290016	289844	Hypothetical			scaffold_23	-	182449	184074													21.899	9.32	5.346	0.0397	4.09633	0.0157	2.34968	0.263	1.74336	3838	nucleus	IPR001092	Basic helix-loop-helix dimerisation region bHLH	HMMPfam	PF00010	HLH	1	105,	175,	0.00011
31388	31216	Hypothetical	IVS		scaffold_127	+	9620	12452													25.695	17.055	7.263	0.0422	3.53779	0.0679	1.5066	0.0746	2.3482	3838	nucleus	IPR001092	Basic helix-loop-helix dimerisation region bHLH	HMMPfam	PF00010	HLH	1	484,	565,	6.2e-11
38363	38191	Hypothetical			scaffold_303	+	4439	6811													876.754	907.703	409.351	0.0415	2.14181	0.853	0.965904	0.0297	2.21742	3838	nucleus	IPR001092	Basic helix-loop-helix dimerisation region bHLH	HMMPfam	PF00010	HLH	1	76,	128,	1.9e-12
64667	64495	Hypothetical			scaffold_12	+	89189	92473													16.394	8.484	3.338	0.0456	4.91132	0.00656	1.93234	0.116	2.54164	3827	intracellular	IPR001357	BRCT	HMMPfam	PF00533	BRCT	3	52,143,543,	125,230,618,	3.6e-11,9.2e-06,1.8e-07	2.7.7.7	DNA-directed DNA polymerase.	N deoxynucleoside triphosphate = N diphosphate + {DNA}(N).	\N	Purine metabolism	Nucleotide Metabolism	METABOLIC
41328	41156	Hypothetical			scaffold_223	+	12106	12417													16.034	4.655	5.917	0.178	2.70982	0.0265	3.44447	0.669	0.786716	3827	intracellular	IPR001357	BRCT	ProfileScan	PS50172	BRCT	1	24,	104,	8.805
71934	71762	Hypothetical			scaffold_68	+	112786	113456													78.001	44.765	17.965	0.0119	4.34183	0.0271	1.74246	0.0382	2.49179	3827	intracellular	IPR001357	BRCT	HMMPfam	PF00533	BRCT	1	66,	146,	8e-09
61599	61427	Hypothetical			scaffold_1	+	332878	333279													38.628	18.969	40.84	0.919	0.945837	0.0123	2.03638	0.152	0.464471	3782	extracellular region	IPR001283	Allergen V5/Tpx-1 related	BlastProDom	PD000542	Q9HFZ2_CANAL_Q9HFZ2;	1	60,	111,	1e-06
377555	377383	Hypothetical			scaffold_42	-	1395	2993													6.595	16.768	4.749	0.15	1.38871	0.000777	0.393309	0.00797	3.53085	3737	GTP binding	IPR000897	Signal recognition particle, SRP54 subunit, GTPase	ScanRegExp	PS00300	SRP54	1	178,	191,	NA
25646	25474	Hypothetical		62aa	scaffold_128	-	71249	71434													5.158	14.475	2.171	0.0677	2.37586	0.0225	0.356339	0.00398	6.66743	3737	GTP binding	IPR000897	Signal recognition particle, SRP54 subunit, GTPase	ScanRegExp	PS00300	SRP54	1	2,	15,	NA
81043	80871	Hypothetical		Possible Dynamin GTPase effector	scaffold_426	-	2507	4918													10.614	12.972	3.68	0.0719	2.88424	0.4	0.818224	0.0497	3.525	3737	GTP binding	IPR000375	Dynamin central region	HMMPfam	PF01031	Dynamin_M	1	154,	285,	8.9e-10
75219	75047	Hypothetical		107 aa, BTB/POZ	scaffold_120	+	10139	10459													178.941	35.384	3.509	0.0426	50.9949	0.000936	5.05712	0.109	10.0838	3727	protein binding	IPR013069	BTB/POZ	HMMPfam	PF00651	BTB	1	10,	46,	0.0003
123468	123296	Hypothetical	TMHs		scaffold_341	+	7553	8448													------	------	------	NaN	#VALUE!	NaN	#VALUE!	NaN	#VALUE!	3727	protein binding	IPR011333	BTB/POZ fold	superfamily	SSF54695	POZ domain	1	52,	181,	0.004
42301	42129	Hypothetical			scaffold_120	-	26313	26837													36.786	32.817	2.221	0.00456	16.5628	0.748	1.12094	0.00944	14.7758	3727	protein binding	IPR011333	BTB/POZ fold	superfamily	SSF54695	POZ domain	1	2,	110,	0.014
321396	321224	Hypothetical		poor model	scaffold_286	+	4385	6443													13.256	15.067	3.922	0.0461	3.37991	0.341	0.879804	0.0311	3.84166	3727	protein binding	IPR001965	Zinc finger, PHD-type	HMMSmart	SM00249	no description	1	6,	67,	0.00059
127550	127378	Hypothetical			scaffold_52	-	68294	69656													102.577	62.63	38.878	0.259	2.63843	0.233	1.63783	0.509	1.61094	3727	protein binding	IPR001841	Zinc finger, RING-type	HMMPfam	PF00097	zf-C3HC4	1	3,	49,	0.00027
474608	474436	Hypothetical			scaffold_9	-	132034	133677													19.592	14.429	5.159	0.0479	3.79764	0.098	1.35782	0.0654	2.79686	3727	protein binding	IPR001841	Zinc finger, RING-type	HMMPfam	PF00097	zf-C3HC4	1	220,	266,	0.0026
23180	23008	Hypothetical		possible transcription factor	scaffold_31	+	37503	38854													60.217	55.267	12.53	0.0166	4.80583	0.789	1.08957	0.0347	4.41077	3727	protein binding	IPR001841	Zinc finger, RING-type	HMMPfam	PF00097	zf-C3HC4	1	62,	105,	1.4e-05
18041	17869	Hypothetical			scaffold_6	-	341409	342142													23.734	29.81	8.646	0.0236	2.74508	0.432	0.796176	0.028	3.44784	3727	protein binding	IPR001841	Zinc finger, RING-type	HMMPfam	PF00097	zf-C3HC4	1	109,	146,	0.00018
31833	31661	Hypothetical			scaffold_165	-	29689	30707													100.176	154.077	49.618	0.0483	2.01894	0.066	0.650168	0.018	3.10526	3727	protein binding	IPR001841	Zinc finger, RING-type	HMMPfam	PF00097	zf-C3HC4	1	64,	105,	6.7e-10
485252	485080	Hypothetical			scaffold_96	+	77423	78596													38.777	15.201	23.838	0.154	1.62669	0.000918	2.55095	0.176	0.637679	3727	protein binding	IPR001202	WW/Rsp5/WWP	HMMSmart	SM00456	no description	1	103,	138,	0.00067
17739	17567	Hypothetical			scaffold_2	+	7633	8618													293	427.931	141.496	0.0328	2.07073	0.0588	0.68469	0.0145	3.02433	3727	protein binding	IPR001202	WW/Rsp5/WWP	superfamily	SSF51045	WW domain	1	7,	47,	0.00036
105127	104955	Hypothetical			scaffold_49	-	104306	105407													11.459	11.355	3.666	0.0308	3.12575	0.97	1.00916	0.0322	3.09738	3727	protein binding	IPR000210	BTB/POZ-like	ProfileScan	PS50097	BTB	1	30,	98,	8.627
101715	101543	Hypothetical			scaffold_20	-	83623	85316													95.299	94.436	18.754	0.00915	5.08153	0.961	1.00914	0.0116	5.03551	3727	protein binding	IPR000210	BTB/POZ-like	ProfileScan	PS50097	BTB	1	61,	134,	8.503
429296	429124	Hypothetical			scaffold_65	-	70746	72081													22.897	25.554	5.941	0.00367	3.85406	0.533	0.896024	0.00736	4.3013	3727	protein binding	IPR000210	BTB/POZ-like	ProfileScan	PS50097	BTB	1	25,	103,	9.393
120641	120469	Hypothetical			scaffold_128	+	28598	29958													19.424	23.063	12.054	0.285	1.61142	0.514	0.842215	0.112	1.91331	3727	protein binding	IPR000210	BTB/POZ-like	HMMSmart	SM00225	no description	1	70,	193,	3.5e-06
358850	358678	Hypothetical			scaffold_36	+	151412	152575													10.792	13.104	2.046	0.00539	5.27468	0.302	0.823565	0.00295	6.40469	3727	protein binding	IPR000210	BTB/POZ-like	HMMSmart	SM00225	no description	1	21,	132,	0.0092
161322	161150	Hypothetical			scaffold_110	+	40511	41938													3.864	10.965	1.345	0.0268	2.87286	0.0086	0.352394	0.00387	8.15242	3727	protein binding	IPR000210	BTB/POZ-like	ProfileScan	PS50097	BTB	1	42,	116,	9.641
476969	476797	Hypothetical	SS		scaffold_9	+	313863	315363													2.332	1.059	1.944	0.743	1.19959	0.00493	2.20208	0.287	0.544753	3724	calcium ion binding	IPR002048	Calcium-binding EF-hand	ScanRegExp	PS00018	EF_HAND_1	1	232,	244,	NA	2.3.1.48	Histone acetyltransferase.	Acetyl-CoA + histone = CoA + acetyl-histone.	\N	\N	\N	\N
116850	116678	Hypothetical	SS		scaffold_33	-	102461	103992													390.736	300.06	1276.72	0.012	0.306048	0.214	1.30219	0.00707	0.235025	3722	copper ion binding	IPR003245	Plastocyanin-like	HMMPfam	PF02298	Cu_bind_like	1	204,	276,	0.00084	3.2.1.18	Exo-alpha-sialidase.	Hydrolysis of alpha-(2->3)-, alpha-(2->6)-, alpha-(2->8)-glycosidic linkages of terminal sialic residues in oligosaccharides, glycoproteins, glycolipids, colominic acid and synthetic substrates.	\N	N-Glycan degradation	Metabolism of Complex Carbohydrates	METABOLIC
479275	479103	Hypothetical	SS	copper binding	scaffold_91	+	94522	95913													6.801	6.498	33.583	0.0054	0.202513	0.829	1.04663	0.00509	0.193491	3722	copper ion binding	IPR000923	Blue (type 1) copper domain	HMMPfam	PF00127	Copper-bind	1	48,	145,	4.2e-05
125544	125372	Hypothetical			scaffold_15	-	104119	106911													12.181	11	8.967	0.204	1.35843	0.609	1.10736	0.454	1.22672	3708	binding	IPR016024	Armadillo-type fold	superfamily	SSF48371	ARM repeat	1	20,	538,	0.00097
100531	100359	Hypothetical			scaffold_12	-	202337	205053													12.117	5.115	4.016	0.0412	3.01718	0.0159	2.36891	0.442	1.27366	3546	transporter activity	IPR005814	Aminotransferase class-III	HMMPfam	PF00202	Aminotran_3	2	328,613,	446,677,	6.3e-19,3e-13	2.6.1.62	Adenosylmethionine--8-amino-7-oxononanoate aminotransferase.	S-adenosyl-L-methionine + 8-amino-7-oxononanoate = S-adenosyl-4- methylthio-2-oxobutanoate + 7,8-diaminononanoate.	Pyridoxal-phosphate.	Biotin metabolism	Metabolism of Cofactors and Vitamins	METABOLIC
84031	83859	Hypothetical			scaffold_11	-	16022	17400													34.718	31.298	19.772	0.066	1.75592	0.471	1.10927	0.11	1.58295	3514	hormone activity	IPR000210	BTB/POZ-like	ProfileScan	PS50097	BTB	1	21,	97,	9.475
508649	508477	Hypothetical			scaffold_411	+	5081	7128													0.426	0.101	0.135	0.115	3.15556	0.0048	4.21782	0.666	0.748148	3425	Rho guanyl-nucleotide exchange factor activity	IPR000219	Dbl homology (DH) domain	HMMPfam	PF00621	RhoGEF	1	600,	622,	2.3e-05	6.3.2.-	Acid--D-amino-acid ligases (peptide synthases).	\N	\N	Tryptophan metabolism	Amino Acid Metabolism	METABOLIC
92871	92699	Hypothetical		Possible transcription factor	scaffold_118	-	46375	49330													120.64	111.922	23.68	0.0276	5.09459	0.633	1.07789	0.0265	4.72644	3228	signal transducer activity	IPR000679	Zinc finger, GATA-type	HMMPfam	PF00320	GATA	1	539,	574,	1e-15
128746	128574	Hypothetical			scaffold_93	+	14151	16747													54.063	104.967	4.129	0.00696	13.0935	0.0789	0.515048	0.00277	25.4219	3225	serine-type endopeptidase inhibitor activity	IPR000215	Protease inhibitor I4, serpin	ScanRegExp	PS00284	SERPIN	1	65,	75,	NA
422175	422003	Hypothetical			scaffold_61	+	5827	8331													26.866	12.047	7.95	0.0528	3.37937	0.0308	2.2301	0.269	1.51535	3079	protein-tyrosine kinase activity	IPR008266	Tyrosine protein kinase, active site	ScanRegExp	PS00109	PROTEIN_KINASE_TYR	1	522,	534,	NA
126228	126056	Hypothetical			scaffold_25	+	86321	89571													41.427	22.637	12.621	0.0394	3.28239	0.0635	1.83006	0.0766	1.7936	3079	protein-tyrosine kinase activity	IPR008266	Tyrosine protein kinase, active site	ScanRegExp	PS00109	PROTEIN_KINASE_TYR	1	608,	620,	8e-05
315727	315555	Hypothetical			scaffold_279	-	12740	15585													11.135	12.176	3.467	0.0275	3.21171	0.679	0.914504	0.0219	3.51197	3079	protein-tyrosine kinase activity	IPR008266	Tyrosine protein kinase, active site	ScanRegExp	PS00109	PROTEIN_KINASE_TYR	1	486,	498,	8e-05
123044	122872	Hypothetical		possible protein kinase	scaffold_279	+	18409	20943													11.822	16.368	3.029	0.0195	3.90294	0.0738	0.722263	0.00997	5.40376	3079	protein-tyrosine kinase activity	IPR008266	Tyrosine protein kinase, active site	ScanRegExp	PS00109	PROTEIN_KINASE_TYR	1	535,	547,	NA
292750	292578	Hypothetical			scaffold_236	-	16760	19237													13.159	20.631	6.439	0.0439	2.04364	0.0373	0.637827	0.0086	3.20407	3079	protein-tyrosine kinase activity	IPR008266	Tyrosine protein kinase, active site	ScanRegExp	PS00109	PROTEIN_KINASE_TYR	1	427,	439,	NA
206553	206381	Hypothetical		possible protein kinase	scaffold_148	-	19614	21390													11.521	15.669	2.58	0.0371	4.4655	0.212	0.735273	0.0266	6.07326	3043	protein kinase activity	IPR000719	Protein kinase, core	BlastProDom	PD000001	AFC1_ARATH_P51566;	1	57,	333,	9e-19	2.7.1.37	Protein kinase.	ATP + a protein = ADP + a phosphoprotein.	\N	\N	\N	\N
124413	124241	Hypothetical		possible protein kinase	scaffold_3	-	320026	322170													31.659	11.604	6.597	0.0198	4.799	0.0152	2.72828	0.0646	1.75898	3043	protein kinase activity	IPR000719	Protein kinase, core	BlastProDom	PD000001	Q695H0_CHLRE_Q695H0;	1	95,	321,	2e-23
37550	37378	Hypothetical			scaffold_173	-	39977	42632													17.692	13.611	6.29	0.0251	2.81272	0.158	1.29983	0.0356	2.16391	3043	protein kinase activity	IPR000719	Protein kinase, core	BlastProDom	PD000001	Q17448_CAEEL_Q17448;	1	397,	514,	0.002
122178	122006	Hypothetical			scaffold_205	+	37899	39232													2.732	2.868	1.424	0.117	1.91854	0.878	0.95258	0.105	2.01404	3043	protein kinase activity	IPR000719	Protein kinase, core	BlastProDom	PD000001	Q8SSJ0_EEEEE_Q8SSJ0;	1	265,	333,	3e-05
129577	129405	Hypothetical		Possible protein kinas	scaffold_132	-	40758	42760													28.035	35.619	11.146	0.0314	2.51525	0.211	0.78708	0.00865	3.19568	3043	protein kinase activity	IPR000719	Protein kinase, core	BlastProDom	PD000001	YPK2_YEAST_P18961;	1	235,	431,	2e-22
202115	201943	Hypothetical		poor model, possible protein kinase	scaffold_143	+	6963	7947													4.78	10.439	6.715	0.297	0.711839	0.0255	0.457898	0.15	1.55458	3043	protein kinase activity	IPR000719	Protein kinase, core	BlastProDom	PD000001	Q9FLV4_ARATH_Q9FLV4;	1	33,	150,	2e-07
501669	501497	Hypothetical			scaffold_236	+	13859	16543													0.521	1.194	0.224	0.106	2.32589	0.0629	0.436348	0.00599	5.33036	3043	protein kinase activity	IPR000719	Protein kinase, core	ProfileScan	PS50011	PROTEIN_KINASE_DOM	1	272,	610,	10.238
109874	109702	Hypothetical			scaffold_141	-	20211	22067													11.061	25.875	14.394	0.451	0.768445	0.0014	0.427478	0.129	1.79762	3043	protein kinase activity	IPR000719	Protein kinase, core	BlastProDom	PD000001	Q93ZU3_ARATH_Q93ZU3;	1	51,	272,	3e-12
191889	191717	Hypothetical	TMHs, ICMT family		scaffold_134	+	61019	62060													39.731	15.411	41.354	0.909	0.960753	0.0246	2.57809	0.0612	0.37266	3042	protein-S-isoprenylcysteine O-methyltransferase activity	IPR007269	Isoprenylcysteine carboxyl methyltransferase	HMMPfam	PF04140	ICMT	1	100,	164,	1.1e-13
123182	123010	Hypothetical	SS		scaffold_295	+	506	1320													8.02	9.265	1.738	0.0118	4.6145	0.33	0.865623	0.00745	5.33084	3042	protein-S-isoprenylcysteine O-methyltransferase activity	IPR007269	Isoprenylcysteine carboxyl methyltransferase	HMMPfam	PF04140	ICMT	1	117,	169,	5.2e-12
115009	114837	Hypothetical		possible phospholipase	scaffold_11	+	191461	194805													40.26	38.707	10.69	0.0204	3.76614	0.776	1.04012	0.0189	3.62086	2994	phospholipase activity	IPR002642	Lysophospholipase, catalytic region	HMMPfam	PF01735	PLA2_B	1	201,	654,	9.9e-09
97861	97689	Hypothetical		Possible phosphoglycerate mutase	scaffold_2	-	23435	24626													128.61	198.204	61.159	0.0449	2.10288	0.095	0.648877	0.0184	3.2408	2993	phosphoglycerate mutase activity	IPR013078	Phosphoglycerate mutase	HMMPfam	PF00300	PGAM	1	10,	175,	3.1e-32	5.4.2.1	Phosphoglycerate mutase.	2-phospho-D-glycerate + 2,3-diphosphoglycerate = 3-phospho-D-glycerate + 2,3-diphosphoglycerate.	\N	Glycolysis / Gluconeogenesis	Carbohydrate Metabolism	METABOLIC
70199	70027	Hypothetical	TMH, IVS		scaffold_49	+	126082	133668													79.444	93.858	27.624	0.0424	2.87591	0.17	0.846428	0.027	3.3977	2980	phosphatidate cytidylyltransferase activity	IPR001789	Signal transduction response regulator, receiver region	BlastProDom	PD000039	Q6SLD8_COCHE_Q6SLD8;	1	1490,	1607,	1e-17
130565	130393	Hypothetical	TMHs		scaffold_201	+	23090	25218													25.752	17.739	8.123	0.0369	3.17026	0.0331	1.45172	0.0742	2.1838	2976	peroxidase activity	IPR002016	Haem peroxidase, plant/fungal/bacterial	ScanRegExp	PS00435	PEROXIDASE_1	1	268,	278,	NA
113779	113607	Hypothetical		Possible RNA exonuclease	scaffold_2	+	277365	278166													1.771	0.259	0.57	0.223	3.10702	0.000863	6.83784	0.329	0.454386	2917	exonuclease activity	IPR013520	Exonuclease, RNase T and DNA polymerase III	HMMPfam	PF00929	Exonuc_X-T	1	18,	162,	0.0011	3.1.13.1	Exoribonuclease II.	Exonucleolytic cleavage in the 3'- to 5'-direction to yield 5'-phosphomononucleotides.	\N	\N	\N	\N
46345	46173	Hypothetical			scaffold_45	+	31638	33494													22.917	14.692	5.141	0.0178	4.45769	0.168	1.55983	0.0372	2.85781	2909	nuclease activity	IPR006084	DNA repair protein (XPGC)/yeast Rad	FPrintScan	PR00853	XPGRADSUPER	4	37,80,114,135,	51,99,131,155,	6.3e-10,6.3e-10,6.3e-10,6.3e-10	3.1.11.1	Exodeoxyribonuclease I.	Degradation of single-stranded DNA. It acts progressively in a 3'- to 5'-direction, releasing 5'-phosphomononucleotides.	\N	\N	\N	\N
62606	62434	Hypothetical		Possible endonuclease	scaffold_4	+	147930	149931													9.121	19.02	9.823	0.739	0.928535	0.00493	0.479548	0.0414	1.93627	2909	nuclease activity	IPR006084	DNA repair protein (XPGC)/yeast Rad	FPrintScan	PR00853	XPGRADSUPER	5	30,73,359,382,435,	44,92,376,402,450,	1.3e-12,1.3e-12,1.3e-12,1.3e-12,1.3e-12	3.-.-.-	Hydrolases.	\N	\N	\N	\N	\N
44534	44362	Hypothetical		possible cytochrome P450	scaffold_65	-	64876	66625													10.775	9.686	2.224	0.0231	4.84487	0.399	1.11243	0.0247	4.35522	2888	monooxygenase activity	IPR001128	Cytochrome P450	FPrintScan	PR00385	P450	4	272,308,388,397,	285,319,397,408,	6.4e-10,6.4e-10,6.4e-10,6.4e-10	1.14.-.-	Acting on paired donors, with incorporation or reduction of	\N	\N	gamma-Hexachlorocyclohexane degradation	Biodegradation of Xenobiotics	METABOLIC
123327	123155	Hypothetical		very small model	scaffold_316	+	30	411													4.84	1.651	12.014	NaN	0.402863	NaN	2.93156	NaN	0.137423	2888	monooxygenase activity	IPR001128	Cytochrome P450	superfamily	SSF48264	Cytochrome P450	1	1,	60,	2.9e-07
115859	115687	Hypothetical	SS/TMHs	possible cytochrome p450	scaffold_20	+	183498	185417													21.462	46.34	10.783	0.0919	1.99036	0.0197	0.463142	0.0244	4.29751	2888	monooxygenase activity	IPR001128	Cytochrome P450	FPrintScan	PR00385	P450	4	286,340,416,425,	303,351,425,436,	5.1e-10,5.1e-10,5.1e-10,5.1e-10
62312	62140	Hypothetical	TMH	possible inositol polyphosphate 5-phosphatase	scaffold_3	-	212463	213968													25.873	12.649	6.327	0.167	4.0893	0.044	2.04546	0.449	1.99921	2832	inositol or phosphatidylinositol phosphatase activity	IPR005135	Endonuclease/exonuclease/phosphatase	HMMPfam	PF03372	Exo_endo_phos	1	8,	345,	2.7e-24	3.1.3.36	Phosphatidylinositol-bisphosphatase.	Phosphatidyl-myo-inositol 4,5-bisphosphate + H(2)O = phosphatidylinositol 4-phosphate + phosphate.	\N	\N	\N	\N
112618	112446	Hypothetical			scaffold_268	-	21372	23492													70.822	54.997	25.818	0.0336	2.74312	0.0795	1.28774	0.0552	2.13018	2802	histone acetyltransferase activity	IPR007854	Fip1	HMMPfam	PF05182	Fip1	1	113,	171,	5e-14	2.3.1.48	Histone acetyltransferase.	Acetyl-CoA + histone = CoA + acetyl-histone.	\N	\N	\N	\N
17365	17193	Hypothetical			scaffold_353	-	8923	11868													------	0.052	0.048	NaN	#VALUE!	NaN	#VALUE!	NaN	1.08333	2802	histone acetyltransferase activity	IPR003347	Transcription factor jumonji/aspartyl beta-hydroxylase	ProfileScan	PS51184	JMJC	1	532,	717,	13.526	2.3.1.48	Histone acetyltransferase.	Acetyl-CoA + histone = CoA + acetyl-histone.	\N	\N	\N	\N
128231	128059	Hypothetical			scaffold_73	+	48231	50232													193.222	111.361	125.369	0.0891	1.54123	0.0103	1.7351	0.603	0.888266	2802	histone acetyltransferase activity										2.3.1.48	Histone acetyltransferase.	Acetyl-CoA + histone = CoA + acetyl-histone.	\N	\N	\N	\N
36251	36079	Hypothetical	TMHs	MAPEG family	scaffold_87	-	91494	92437													191.844	121.71	71.434	0.0561	2.68561	0.198	1.57624	0.262	1.70381	2770	glutathione transferase activity	IPR001129	Membrane-associated proteins in eicosanoid and glutathione metabolism (MAPEG)	HMMPfam	PF01124	MAPEG	1	7,	146,	7e-32	2.5.1.18	Glutathione transferase.	RX + glutathione = HX + R-S-glutathione.	\N	Glutathione metabolism	Metabolism of Other Amino Acids	METABOLIC
126971	126799	Hypothetical	SS		scaffold_38	-	18833	19656													19.087	9.676	45.966	0.0505	0.415242	0.00856	1.97261	0.00903	0.210503	2745	glucan 1,4-alpha-glucosidase activity										3.2.1.3	Glucan 1,4-alpha-glucosidase.	Hydrolysis of terminal 1,4-linked alpha-D-glucose residues successively from non-reducing ends of the chains with release of beta-D-glucose.	\N	Starch and sucrose metabolism	Metabolism of Complex Carbohydrates	METABOLIC
34462	34290	Hypothetical			scaffold_25	-	207453	211731													24.512	17.879	8.678	0.0413	2.82461	0.101	1.37099	0.068	2.06027	2745	glucan 1,4-alpha-glucosidase activity										3.2.1.3	Glucan 1,4-alpha-glucosidase.	Hydrolysis of terminal 1,4-linked alpha-D-glucose residues successively from non-reducing ends of the chains with release of beta-D-glucose.	\N	Starch and sucrose metabolism	Metabolism of Complex Carbohydrates	METABOLIC
125015	124843	Hypothetical			scaffold_9	-	162071	167524													65.798	63.69	20.52	0.0483	3.20653	0.826	1.0331	0.0429	3.1038	2745	glucan 1,4-alpha-glucosidase activity										3.2.1.3	Glucan 1,4-alpha-glucosidase.	Hydrolysis of terminal 1,4-linked alpha-D-glucose residues successively from non-reducing ends of the chains with release of beta-D-glucose.	\N	Starch and sucrose metabolism	Metabolism of Complex Carbohydrates	METABOLIC
388019	387847	Hypothetical		poor model	scaffold_46	-	116475	119682													22.413	15.281	7.698	0.0353	2.91154	0.0657	1.46672	0.0859	1.98506	2715	exo-alpha-sialidase activity										3.2.1.18	Exo-alpha-sialidase.	Hydrolysis of alpha-(2->3)-, alpha-(2->6)-, alpha-(2->8)-glycosidic linkages of terminal sialic residues in oligosaccharides, glycoproteins, glycolipids, colominic acid and synthetic substrates.	\N	N-Glycan degradation	Metabolism of Complex Carbohydrates	METABOLIC
115754	115582	Hypothetical			scaffold_19	+	95127	97347													93.358	69.266	32.268	0.0418	2.89321	0.0847	1.34782	0.0667	2.14658	2715	exo-alpha-sialidase activity										3.2.1.18	Exo-alpha-sialidase.	Hydrolysis of alpha-(2->3)-, alpha-(2->6)-, alpha-(2->8)-glycosidic linkages of terminal sialic residues in oligosaccharides, glycoproteins, glycolipids, colominic acid and synthetic substrates.	\N	N-Glycan degradation	Metabolism of Complex Carbohydrates	METABOLIC
126640	126468	Hypothetical		possible alkaline proteinase	scaffold_32	-	30856	32573													22.2	19.773	3.647	0.0383	6.08719	0.711	1.12274	0.0235	5.42172	2700	subtilase activity	IPR000209	Peptidase S8 and S53, subtilisin, kexin, sedolisin	FPrintScan	PR00723	SUBTILISIN	3	132,175,331,	151,188,347,	3.5e-13,3.5e-13,3.5e-13	3.4.24.-	Metalloendopeptidases.	\N	\N	\N	\N	\N
122614	122442	Hypothetical			scaffold_237	+	6501	8045													14.657	10.89	3.62	0.0406	4.0489	0.0987	1.34591	0.0589	3.00829	2657	ubiquitin thiolesterase activity	IPR001578	Peptidase C12, ubiquitin carboxyl-terminal hydrolase 1	BlastProDom	PD350662	Q945M7_ARATH_Q945M7;	1	19,	277,	2e-23	3.4.19.12	Ubiquitinyl hydrolase 1.	Thiol-dependent hydrolysis of ester, thiolester, amide, peptide and isopeptide bonds formed by the C-terminal Gly of ubiquitin (a 76-residue protein attached to proteins as an intracellular targeting signal).	\N	\N	\N	\N
59597	59425	Hypothetical	TMHs		scaffold_93	-	72542	73507													27.123	28.202	6.689	0.0196	4.05487	0.846	0.96174	0.0212	4.21618	2635	cysteine-type endopeptidase activity	IPR003675	Abortive infection protein	HMMPfam	PF02517	Abi	1	131,	245,	8.1e-17	3.4.22.-	Cysteine endopeptidases.	\N	\N	\N	\N	\N
37887	37715	hypothetical	TMH	possible pepsin	scaffold_213	-	6994	10148													36.628	13.231	16.127	0.119	2.27122	0.0261	2.76835	0.698	0.820425	2632	pepsin A activity	IPR001461	Peptidase A1	FPrintScan	PR00792	PEPSIN	3	147,370,477,	167,381,492,	5.1e-10,5.1e-10,5.1e-10	3.4.23.25	Saccharopepsin.	Hydrolysis of proteins with broad specificity for peptide bonds. Cleaves -Leu-Leu-|-Val-Tyr- bond in a synthetic substrate. Does not act on esters of Tyr or Arg.	\N	\N	\N	\N
131214	131042	Hypothetical	TMH		scaffold_288	+	17126	19405													186.857	111.085	93.364	0.0393	2.00138	0.00813	1.68211	0.447	1.18981	2628	aspartic-type endopeptidase activity	IPR009007	Peptidase aspartic, catalytic	superfamily	SSF50630	Acid proteases	1	243,	371,	6.3e-06
131420	131248	Hypothetical	SS	possible acid protease A	scaffold_345	+	8772	9864													32.915	26.449	10.097	0.0289	3.25988	0.43	1.24447	0.0663	2.61949	2628	aspartic-type endopeptidase activity	IPR000250	Peptidase G1, eqolisin	BlastProDom	PD018627	Q00551_CRYPA_Q00551;	1	57,	244,	7e-28
24705	24533	Hypothetical			scaffold_79	-	32356	34896													30.851	33.383	9.652	0.0483	3.19633	0.542	0.924153	0.0363	3.45866	2623	serine carboxypeptidase activity	IPR005654	AFG1-like ATPase	HMMPfam	PF03969	AFG1_ATPase	2	60,505,	449,528,	3.2e-12,0.00024
440918	440746	Hypothetical			scaffold_7	+	338942	340662													3.199	6.864	1.061	0.034	3.01508	0.0259	0.466055	0.00127	6.46937	2623	serine carboxypeptidase activity	IPR001563	Peptidase S10, serine carboxypeptidase	ScanRegExp	PS00560	CARBOXYPEPT_SER_HIS	1	126,	143,	NA
125657	125485	Hypothetical		IVS	scaffold_16	-	263272	266459													20.465	7.46	16.55	0.538	1.23656	0.00225	2.7433	0.0829	0.450755	2614	ATP-dependent peptidase activity	IPR003111	Peptidase S16, lon N-terminal	HMMPfam	PF02190	LON	1	421,	500,	2.1e-09
121092	120920	Hypothetical	TMH	64aa; Distantly related to mito cytochrome c oxidase subunit	scaffold_146	+	20734	20982													228.533	48.71	1854.62	0.0724	0.123224	0.0623	4.69171	0.00537	0.0262642	2567	cytochrome-c oxidase activity	IPR004202	Cytochrome c oxidase subunit VIIc	HMMPfam	PF02935	COX7C	1	30,	63,	5.6e-05
127808	127636	Hypothetical	TMHs		scaffold_60	-	41580	41953													814.598	507.198	171.614	0.308	4.74669	0.0631	1.60607	0.458	2.95546	2567	cytochrome-c oxidase activity	IPR004202	Cytochrome c oxidase subunit VIIc	HMMPfam	PF02935	COX7C	1	6,	72,	3.1e-06
22556	22384	Hypothetical	Possible CAMP diesterase		scaffold_19	-	199901	201251													26.515	10.08	3.777	0.0646	7.02012	0.00141	2.63046	0.211	2.66878	2554	3',5'-cyclic-AMP phosphodiesterase activity	IPR011563	Cyclic-AMP phosphodiesterase/lactamase	BlastProDom	PD010003	CNA1_SCHPO_P36599;	1	101,	249,	2e-12	3.1.4.17	3',5'-cyclic-nucleotide phosphodiesterase.	Nucleoside 3',5'-cyclic phosphate + H(2)O = nucleoside 5'-phosphate.	\N	Purine metabolism	Nucleotide Metabolism	METABOLIC
78825	78653	Hypothetical		Possible carboxylesteras	scaffold_218	+	151	1851													3.343	5.19	0.859	0.0483	3.89173	0.286	0.644123	0.00918	6.04191	2533	carboxylesterase activity	IPR002018	Carboxylesterase, type B	HMMPfam	PF00135	COesterase	1	1,	411,	2.1e-15	3.1.1.1	Carboxylesterase.	A carboxylic ester + H(2)O = an alcohol + a carboxylic anion.	\N	\N	\N	\N
483978	483806	Hypothetical		possible acid phosphatase	scaffold_95	-	66430	68132													20.149	44.734	3.367	0.0439	5.98426	0.0807	0.450418	0.0189	13.286	2441	acid phosphatase activity	IPR000560	Histidine acid phosphatase	HMMPfam	PF00328	Acid_phosphat_A	1	31,	315,	0.00062
121488	121316	Hypothetical			scaffold_165	+	20581	23768													7.111	5.475	56.877	0.00701	0.125024	0.0946	1.29881	0.00358	0.0962604	2426	UDP-N-acetylglucosamine-lysosomal-enzyme N-acetylglucosaminephosphotransferase activity										2.7.8.17	UDP-N-acetylglucosamine--lysosomal-enzyme N-acetylglucosaminephosphotransferase.	UDP-N-acetyl-D-glucosamine + lysosomal-enzyme D-mannose = UMP + lysosomal-enzyme N-acetyl-D-glucosaminyl-phospho-D-mannose.	\N	\N	\N	\N
53448	53276	Hypothetical			scaffold_22	+	12258	15015													16.644	8.853	3.919	0.0148	4.247	0.0743	1.88004	0.0711	2.25899	2365	DNA ligase (ATP) activity	IPR012310	ATP dependent DNA ligase, central	HMMPfam	PF01068	DNA_ligase_A_M	1	404,	526,	5.4e-12	6.5.1.1	DNA ligase (ATP).	ATP + {deoxyribonucleotide}(N) + {deoxyribonucleotide}(M) = AMP + diphosphate + {deoxyribonucleotide}(N+M).	\N	\N	\N	\N
44421	44249	Hypothetical			scaffold_175	-	16	489													18.953	7.905	8.342	0.0683	2.272	0.00559	2.3976	0.889	0.947614	2356	DNA-directed RNA polymerase activity										2.7.7.6	DNA-directed RNA polymerase.	N nucleoside triphosphate = N diphosphate + {RNA}(N).	\N	RNA polymerase	TRANSCRIPTION	REGULATORY
37806	37634	Hypothetical			scaffold_202	-	7613	9418													21.714	9.133	40.37	0.139	0.537875	0.0179	2.37753	0.0306	0.226232	2356	DNA-directed RNA polymerase activity										2.7.7.6	DNA-directed RNA polymerase.	N nucleoside triphosphate = N diphosphate + {RNA}(N).	\N	RNA polymerase	TRANSCRIPTION	REGULATORY
127580	127408	Hypothetical			scaffold_53	-	62869	64871													77.32	50.48	37.364	0.0391	2.06937	0.0328	1.5317	0.224	1.35103	2290	catalytic activity	IPR016040	NAD(P)-binding	superfamily	SSF51735	NAD(P)-binding Rossmann-fold domains	1	138,	213,	2.2e-05
72479	72307	Hypothetical			scaffold_75	+	96443	97391													92.238	270.797	7.659	0.0195	12.0431	0.211	0.340617	0.0171	35.3567	2290	catalytic activity	IPR016040	NAD(P)-binding	superfamily	SSF51735	NAD(P)-binding Rossmann-fold domains	1	1,	89,	6.8e-09
129779	129607	Hypothetical		possible alcohol dehydrogenase	scaffold_143	+	8666	10252													54.678	76.494	7.601	0.0295	7.19353	0.264	0.714801	0.0116	10.0637	2290	catalytic activity	IPR013149	Alcohol dehydrogenase, zinc-binding	HMMPfam	PF00107	ADH_zinc_N	1	161,	298,	2.8e-08	1.6.5.5	NADPH:quinone reductase.	NADPH + quinone = NADP(+) + semiquinone.	Zinc.	\N	\N	\N
65151	64979	Hypothetical		possible NADP-dependent oxidoreductase	scaffold_14	-	203095	204538													47.461	38.41	13.825	0.0404	3.43298	0.296	1.23564	0.0446	2.7783	2290	catalytic activity	IPR013149	Alcohol dehydrogenase, zinc-binding	HMMPfam	PF00107	ADH_zinc_N	1	163,	311,	7.2e-10
118816	118644	Hypothetical			scaffold_73	+	25068	25966													12.732	12.458	0.92	0.0438	13.8391	0.915	1.02199	0.0344	13.5413	2290	catalytic activity	IPR013120	Male sterility, NAD-binding	HMMPfam	PF07993	NAD_binding_4	1	4,	105,	1.2e-12
27295	27123	Hypothetical	SS, Possible glycoside hydrolase		scaffold_1	+	142853	144487													37.159	35.046	5.204	0.00075	7.14047	0.69	1.06029	0.00119	6.73444	2290	catalytic activity	IPR010905	Glycosyl hydrolase, family 88	HMMPfam	PF07470	Glyco_hydro_88	1	31,	383,	9.7e-06
478957	478785	Hypothetical	SS, CBD, cytochrome		scaffold_91	+	52595	55216													8.744	9.864	1.363	0.0011	6.41526	0.319	0.886456	0.000983	7.23698	2290	catalytic activity	IPR006593	Cytochrome b561 / ferric reductase transmembrane	HMMSmart	SM00665	no description	1	256,	384,	1.4e-05
100325	100153	Hypothetical			scaffold_11	-	210533	211865													51.195	38.342	38.65	0.65	1.32458	0.117	1.33522	0.99	0.992031	2290	catalytic activity	IPR001753	Crotonase, core	HMMPfam	PF00378	ECH	1	104,	211,	8.8e-15	5.3.3.8	Dodecenoyl-CoA delta-isomerase.	3-cis-dodecenoyl-CoA = 2-trans-dodecenoyl-CoA.	\N	Fatty acid metabolism	Lipid Metabolism	METABOLIC
15716	15544	Hypothetical			scaffold_156	+	39766	41055													63.5	81.276	17.63	0.0372	3.60182	0.19	0.781288	0.0192	4.6101	2290	catalytic activity	IPR001509	NAD-dependent epimerase/dehydratase	HMMPfam	PF01370	Epimerase	1	4,	252,	0.00081
17433	17261	Hypothetical	TMHs		scaffold_378	-	1127	6135													3.37	2.082	0.663	0.00416	5.08296	0.0975	1.61864	0.0315	3.14027	2290	catalytic activity	IPR001451	Bacterial transferase hexapeptide repeat	HMMPfam	PF00132	Hexapep	5	675,730,969,1190,1213,	692,747,986,1202,1230,	21,6.8,1.9,1.1,63
508223	508051	Hypothetical			scaffold_4	+	365225	369321													13.602	11.761	3.884	0.0479	3.50206	0.317	1.15653	0.0548	3.02806	2290	catalytic activity	IPR000873	AMP-dependent synthetase and ligase	HMMPfam	PF00501	AMP-binding	2	47,244,	204,358,	8.3e-16,0.00027	1.2.1.31	Aminoadipate-semialdehyde dehydrogenase.	L-2-aminoadipate 6-semialdehyde + NADP(+) + H(2)O = L-2-aminoadipate + NADPH.	\N	Lysine biosynthesis	Amino Acid Metabolism	METABOLIC
106705	106533	Hypothetical			scaffold_73	+	5817	9777													14.39	23.774	5.437	0.0306	2.64668	0.0242	0.605283	0.00832	4.37263	2290	catalytic activity	IPR000873	AMP-dependent synthetase and ligase	FPrintScan	PR00154	AMPBINDING	2	186,198,	197,206,	55,55
173486	173314	Hypothetical			scaffold_12	+	155742	156760													39.474	37.893	12.862	0.0491	3.06904	0.921	1.04172	0.0466	2.94612	2290	catalytic activity	IPR000868	Isochorismatase hydrolase	HMMPfam	PF00857	Isochorismatase	1	31,	205,	0.0042
89918	89746	Hypothetical		Possible epoxide hydrolase	scaffold_63	-	53266	54793													72.973	49.152	302.872	0.0147	0.240937	0.157	1.48464	0.00278	0.162286	2290	catalytic activity	IPR000639	Epoxide hydrolase-like	FPrintScan	PR00412	EPOXHYDRLASE	3	18,95,109,	36,108,122,	2.8e-09,2.8e-09,2.8e-09
96689	96517	Hypothetical		Possible epoxide hydrolase	scaffold_281	-	24780	26016													36.781	63.389	12.72	0.0133	2.89159	0.0201	0.580243	0.00523	4.98341	2290	catalytic activity	IPR000639	Epoxide hydrolase-like	FPrintScan	PR00412	EPOXHYDRLASE	5	35,55,101,115,267,	53,70,114,128,283,	1.5e-13,1.5e-13,1.5e-13,1.5e-13,1.5e-13
125477	125305	Hypothetical	TMHs		scaffold_14	+	148919	150706													68.918	56.507	21.552	0.0118	3.19775	0.354	1.21964	0.0339	2.62189	2290	catalytic activity	IPR000594	UBA/THIF-type NAD/FAD binding fold	HMMPfam	PF00899	ThiF	1	106,	240,	9.2e-47	6.3.2.19	Ubiquitin--protein ligase.	ATP + ubiquitin + protein lysine = AMP + diphosphate + protein N-ubiquityllysine.	\N	\N	\N	\N
296960	296788	Hypothetical		highly conserved	scaffold_24	-	197980	203916													36.778	40.733	17.098	0.0829	2.15101	0.491	0.902904	0.0568	2.38233	2246	actin binding	IPR003108	Growth-arrest-specific protein 2	HMMPfam	PF02187	GAS2	1	1575,	1655,	1.8e-05
109391	109219	Hypothetical	109 aa		scaffold_128	+	23294	23928													108.634	46.196	89.223	0.456	1.21756	0.0052	2.35159	0.0513	0.517759	2244	microtubule motor activity	IPR001372	Dynein light chain, type 1 and 2	BlastProDom	PD005145	DYL1_CHLRE_Q39580;	1	29,	108,	7e-33	3.6.4.2	Dynein ATPase.	ATP + H(2)O = ADP + phosphate.	\N	\N	\N	\N
49185	49013	Hypothetical			scaffold_301	-	5862	6135													1.614	1.542	6.418	0.0583	0.25148	0.96	1.04669	0.128	0.240262	2233	peptidyl-prolyl cis-trans isomerase activity	IPR004910	Yippee-like protein	HMMPfam	PF03226	Yippee	1	2,	71,	6.9e-16	5.2.1.8	Peptidylprolyl isomerase.	Peptidylproline (omega=180) = peptidylproline (omega=0).	\N	\N	\N	\N
31682	31510	Hypothetical			scaffold_149	-	15415	16907													119.43	99.123	63.568	0.0828	1.87878	0.198	1.20487	0.163	1.55932	2233	peptidyl-prolyl cis-trans isomerase activity										5.2.1.8	Peptidylprolyl isomerase.	Peptidylproline (omega=180) = peptidylproline (omega=0).	\N	\N	\N	\N
84295	84123	Hypothetical			scaffold_12	-	84854	85435													46.306	21.131	67.268	0.253	0.688381	0.0475	2.19138	0.0359	0.314132	2227	structural constituent of ribosome	IPR016082	Ribosomal protein L30, C-terminal	superfamily	SSF55129	Ribosomal protein L30p/L7e	1	46,	105,	4.4e-11
112431	112259	Hypothetical			scaffold_252	+	1834	2311													88.658	43.252	70.979	0.613	1.24907	0.0421	2.0498	0.302	0.609363	2227	structural constituent of ribosome	IPR000266	Ribosomal protein S17	BlastProDom	PD001295	Q9PLY0_CAMJE_Q9PLY0;	1	8,	72,	3e-11
29804	29632	Hypothetical	82aa		scaffold_45	-	82574	83364													4.956	9.36	26.445	0.00358	0.187408	0.0619	0.529487	0.0346	0.353942	2218	double-stranded RNA binding	IPR001159	Double-stranded RNA binding	ProfileScan	PS50137	DS_RBD	1	5,	74,	8.834
28986	28814	Hypothetical			scaffold_24	-	119092	122051													23.426	24.428	7.769	0.0206	3.01532	0.81	0.958981	0.0155	3.14429	2216	RNA binding	IPR001313	Pumilio RNA-binding region	HMMPfam	PF00806	PUF	4	142,351,388,613,	176,384,422,647,	0.006,0.95,5.3,0.45
76700	76528	Hypothetical		possible ribonuclease	scaffold_150	+	2629	3210													15.843	6.166	6.943	0.0867	2.28187	0.0344	2.56941	0.735	0.888089	2216	RNA binding	IPR000026	Guanine-specific ribonuclease N1 and T1	HMMPfam	PF00545	Ribonuclease	1	15,	117,	2.5e-29
121696	121524	Hypothetical			scaffold_175	-	48760	49920													15.148	5.701	38.757	0.141	0.390846	0.00105	2.65708	0.0276	0.147096	2196	transcription factor activity	IPR011700	Basic leucine zipper	HMMPfam	PF07716	bZIP_2	1	233,	286,	5.6e-07
113586	113414	Hypothetical			scaffold_1	-	450913	452824													140.874	91.941	69.076	0.0719	2.03941	0.182	1.53222	0.513	1.33101	2196	transcription factor activity	IPR011616	bZIP transcription factor, bZIP-1	HMMPfam	PF00170	bZIP_1	1	46,	96,	5.8e-09
117926	117754	Hypothetical			scaffold_52	-	117578	119431													7.311	2.193	2.364	0.126	3.09264	0.0099	3.33379	0.911	0.927665	2196	transcription factor activity	IPR009056	Cytochrome c, monohaem	ProfileScan	PS51007	CYTC	1	312,	468,	7.282
127597	127425	Hypothetical		Possible transcription factor	scaffold_54	-	4382	8369													13.882	5.532	2.712	0.106	5.11873	0.00374	2.5094	0.387	2.03982	2196	transcription factor activity	IPR007219	Fungal specific transcription factor	HMMPfam	PF04082	Fungal_trans	1	362,	460,	5.6e-22
81168	80996	Hypothetical			scaffold_534	-	1	724													------	------	------	NaN	#VALUE!	NaN	#VALUE!	NaN	#VALUE!	2196	transcription factor activity	IPR002197	Helix-turn-helix, Fis-type	FPrintScan	PR01590	HTHFIS	2	24,132,	41,152,	0.82,0.82
36832	36660	Hypothetical	5' transcription factor-like		scaffold_120	-	14439	16507													34.637	14.673	33.62	0.963	1.03025	0.00166	2.36059	0.169	0.436437	2196	transcription factor activity	IPR002100	Transcription factor, MADS-box	FPrintScan	PR00404	MADSDOMAIN	3	3,23,38,	23,38,59,	8.5e-14,8.5e-14,8.5e-14
38391	38219	Hypothetical			scaffold_316	-	2149	4474													15.179	9.35	3.918	0.0304	3.87417	0.0224	1.62342	0.0727	2.38642	2196	transcription factor activity	IPR001356	Homeobox	BlastProDom	PD000010	Q9VPL4_DROME_Q9VPL4;	1	349,	392,	6e-08
516054	515882	Hypothetical			scaffold_86	+	53338	55931													12.597	8.256	3.573	0.0254	3.52561	0.0561	1.5258	0.0608	2.31066	2196	transcription factor activity	IPR001138	Fungal transcriptional regulatory protein, N-terminal	FPrintScan	PR00054	FUNGALZNCYS	3	418,427,439,	424,437,450,	0.54,0.54,0.54	6.3.2.-	Acid--D-amino-acid ligases (peptide synthases).	\N	\N	Tryptophan metabolism	Amino Acid Metabolism	METABOLIC
125720	125548	Hypothetical			scaffold_17	+	226101	228975													117.463	124.623	76.933	0.138	1.52682	0.781	0.942547	0.16	1.61989	2196	transcription factor activity	IPR001138	Fungal transcriptional regulatory protein, N-terminal	HMMPfam	PF00172	Zn_clus	1	107,	148,	0.00048	6.3.2.-	Acid--D-amino-acid ligases (peptide synthases).	\N	\N	Tryptophan metabolism	Amino Acid Metabolism	METABOLIC
81113	80941	Hypothetical	Possible fungal regulatory protein		scaffold_462	+	2093	2506													35.263	13.128	17.751	0.254	1.98654	0.000235	2.68609	0.591	0.739564	2196	transcription factor activity	IPR001138	Fungal transcriptional regulatory protein, N-terminal	FPrintScan	PR00054	FUNGALZNCYS	3	27,34,42,	33,40,52,	3.6,3.6,3.6
296390	296218	Hypothetical			scaffold_24	-	164149	164991													3.603	1.226	2.71	0.358	1.32952	0.00106	2.93883	0.0513	0.452399	2196	transcription factor activity	IPR001138	Fungal transcriptional regulatory protein, N-terminal	FPrintScan	PR00054	FUNGALZNCYS	3	13,20,29,	19,26,39,	2.4,2.4,2.4
159752	159580	Hypothetical			scaffold_11	+	270148	274118													17.499	7.239	7.322	0.223	2.38992	0.0181	2.41732	0.987	0.988664	2196	transcription factor activity	IPR001138	Fungal transcriptional regulatory protein, N-terminal	HMMPfam	PF00172	Zn_clus	1	207,	248,	0.00075
29902	29730	Hypothetical			scaffold_48	+	52999	56083													36.963	24.531	6.654	0.0374	5.555	0.136	1.50679	0.0584	3.68665	2196	transcription factor activity	IPR001138	Fungal transcriptional regulatory protein, N-terminal	FPrintScan	PR00054	FUNGALZNCYS	3	30,37,65,	36,43,76,	0.33,0.33,0.33
126512	126340	Hypothetical			scaffold_29	+	196524	200016													11.154	8.134	3.708	0.033	3.00809	0.197	1.37128	0.0672	2.19364	2196	transcription factor activity	IPR001138	Fungal transcriptional regulatory protein, N-terminal	FPrintScan	PR00054	FUNGALZNCYS	4	213,220,229,241,	219,226,239,252,	0.017,0.017,0.017,0.017
126321	126149	Hypothetical		poor model	scaffold_26	+	188230	191668													126.233	94.937	38.134	0.0416	3.31025	0.136	1.32965	0.067	2.48956	2196	transcription factor activity	IPR001138	Fungal transcriptional regulatory protein, N-terminal	FPrintScan	PR00054	FUNGALZNCYS	4	39,46,60,72,	45,52,70,83,	0.045,0.045,0.045,0.045
102311	102139	Hypothetical			scaffold_24	+	77285	80599													35.026	26.549	10.974	0.0409	3.19173	0.134	1.3193	0.0581	2.41926	2196	transcription factor activity	IPR001138	Fungal transcriptional regulatory protein, N-terminal	HMMPfam	PF00172	Zn_clus	1	55,	93,	0.00042
102203	102031	Hypothetical	TMH		scaffold_23	-	143652	146305													32.219	25.192	10.584	0.0329	3.04412	0.135	1.27894	0.0524	2.3802	2196	transcription factor activity	IPR001138	Fungal transcriptional regulatory protein, N-terminal	HMMPfam	PF00172	Zn_clus	1	43,	82,	4.1e-05
88323	88151	Hypothetical			scaffold_42	-	126804	128416													66.857	53.393	18.374	0.0333	3.63867	0.135	1.25217	0.0441	2.9059	2196	transcription factor activity	IPR001138	Fungal transcriptional regulatory protein, N-terminal	HMMPfam	PF00172	Zn_clus	1	26,	66,	8.5e-07
125798	125626	Hypothetical			scaffold_19	-	12909	15310													59.874	59.882	18.275	0.0413	3.27628	1	0.999866	0.0352	3.27672	2196	transcription factor activity	IPR001138	Fungal transcriptional regulatory protein, N-terminal	FPrintScan	PR00054	FUNGALZNCYS	3	12,19,28,	18,25,38,	15,15,15
108333	108161	Hypothetical		possible transcription factor	scaffold_105	-	8899	12444													93.193	95.762	31.933	0.0422	2.91839	0.827	0.973173	0.034	2.99884	2196	transcription factor activity	IPR001138	Fungal transcriptional regulatory protein, N-terminal	HMMPfam	PF00172	Zn_clus	1	20,	60,	0.00012
12642	12470	Hypothetical			scaffold_39	-	124653	126251													11.929	5.492	2.329	0.0723	5.12194	0.0177	2.17207	0.206	2.35809	2196	transcription factor activity	IPR000818	TEA/ATTS	HMMSmart	SM00426	no description	1	48,	117,	2e-08
35958	35786	Hypothetical			scaffold_74	+	24343	26123													12.535	11.699	6.194	0.123	2.02373	0.878	1.07146	0.191	1.88876	2196	transcription factor activity	IPR000818	TEA/ATTS	HMMSmart	SM00426	no description	1	49,	118,	4e-05
15075	14903	Hypothetical		Zn finger	scaffold_122	-	67744	69391													40.673	16.884	26.897	0.578	1.51218	0.00775	2.40897	0.524	0.627728	2196	transcription factor activity	IPR000679	Zinc finger, GATA-type	HMMPfam	PF00320	GATA	1	284,	320,	1.1e-09
61484	61312	Hypothetical		Possible HSP transcription factor	scaffold_1	+	422605	424718													17.575	5.423	8.09	0.331	2.17244	0.000162	3.24083	0.603	0.670334	2196	transcription factor activity	IPR000232	Heat shock factor (HSF)-type, DNA-binding	BlastProDom	PD001788	Q9JIZ8_MOUSE_Q9JIZ8;	1	69,	154,	8e-10
125960	125788	Hypothetical			scaffold_21	-	144970	147256													38.229	38.064	12.265	0.0192	3.11692	0.983	1.00433	0.023	3.10347	2176	DNA binding	IPR014778	Myb, DNA-binding	HMMPfam	PF00249	Myb_DNA-binding	1	507,	552,	1.8e-08
116761	116589	Hypothetical			scaffold_32	-	81200	83005													21.373	28.226	7.297	0.0426	2.92901	0.0761	0.75721	0.0225	3.86816	2176	DNA binding	IPR014778	Myb, DNA-binding	HMMPfam	PF00249	Myb_DNA-binding	3	245,297,348,	291,342,386,	0.074,3.6e-12,0.0054
78221	78049	hypothetical			scaffold_194	-	186	1367													14.748	4.856	3.846	0.0783	3.83463	0.00577	3.03707	0.692	1.26261	2176	DNA binding	IPR010998	Integrase, Lamba-type, N-terminal	superfamily	SSF47823	lambda integrase-like, N-terminal domain	1	48,	161,	0.00025
66776	66604	Hypothetical			scaffold_23	+	190345	191334													84.452	96.997	28.586	0.0221	2.95431	0.266	0.870666	0.0147	3.39316	2176	DNA binding	IPR007219	Fungal specific transcription factor	HMMPfam	PF04082	Fungal_trans	1	165,	266,	2.3e-10
491785	491613	Hypothetical			scaffold_118	+	84842	86472													12.32	15.008	3.375	0.0339	3.65037	0.236	0.820896	0.0226	4.44681	2176	DNA binding	IPR007219	Fungal specific transcription factor	HMMPfam	PF04082	Fungal_trans	1	99,	195,	1.9e-15
127460	127288	Hypothetical			scaffold_49	-	77812	81809													34.426	50.502	12.422	0.0483	2.77137	0.0679	0.681676	0.0211	4.06553	2176	DNA binding	IPR007219	Fungal specific transcription factor	HMMPfam	PF04082	Fungal_trans	1	611,	709,	6.4e-05
152257	152085	Hypothetical		Possible transcription factor	scaffold_107	+	31062	33811													83.297	141.009	13.659	0.0138	6.09832	0.491	0.590721	0.0527	10.3235	2176	DNA binding	IPR007219	Fungal specific transcription factor	HMMPfam	PF04082	Fungal_trans	1	168,	264,	8.9e-16
152151	151979	Hypothetical		Possible transcription factor	scaffold_107	+	28005	29065													69.925	139.132	12.13	0.0288	5.76463	0.504	0.50258	0.0824	11.4701	2176	DNA binding	IPR007219	Fungal specific transcription factor	HMMPfam	PF04082	Fungal_trans	1	1,	31,	2.7e-06
29641	29469	Hypothetical	TMHs		scaffold_39	+	152149	153563													497.048	620.616	3008.45	0.012	0.165217	0.301	0.800895	0.0233	0.206291	2176	DNA binding	IPR004645	DNA-binding protein Tfx	superfamily	SSF89915	DNA-binding protein Tfx	1	82,	151,	0.018
23695	23523	Hypothetical			scaffold_43	+	23092	23739													216.265	284.802	49.775	0.00344	4.34485	0.169	0.759352	0.00298	5.72179	2176	DNA binding	IPR003173	Transcriptional coactivator p15	HMMPfam	PF02229	PC4	1	57,	144,	4.8e-27
98203	98031	Hypothetical			scaffold_2	+	431196	433895													103.975	114.122	40.184	0.0481	2.58747	0.544	0.911086	0.0358	2.83999	2176	DNA binding	IPR001606	AT-rich interaction region	ProfileScan	PS51011	ARID	1	10,	138,	14.678
114668	114496	Hypothetical			scaffold_8	+	353365	353891													------	------	------	NaN	#VALUE!	NaN	#VALUE!	NaN	#VALUE!	2176	DNA binding	IPR001510	Zinc finger, PARP-type	BlastProDom	PD004675	PPOL_SARPE_Q11208;	1	6,	89,	0.0009
275002	274830	Hypothetical			scaffold_210	-	34822	37961													27.841	31.081	10.041	0.0396	2.77273	0.554	0.895756	0.0349	3.09541	2176	DNA binding	IPR001487	Bromodomain	FPrintScan	PR00503	BROMODOMAIN	3	46,62,80,	62,80,99,	5.4e-06,5.4e-06,5.4e-06	2.3.1.48	Histone acetyltransferase.	Acetyl-CoA + histone = CoA + acetyl-histone.	\N	\N	\N	\N
11562	11390	Hypothetical			scaffold_19	+	111649	113993													4.277	2.033	1.973	0.104	2.16776	0.028	2.10379	0.928	1.03041	2176	DNA binding	IPR001005	SANT, DNA-binding	ScanRegExp	PS00037	MYB_1	1	120,	128,	NA
340422	340250	Hypothetical		Possible HMG-box transcription factor	scaffold_31	+	182774	185144													295.723	63.02	19.723	0.0309	14.9938	0.000252	4.69253	0.145	3.19525	2176	DNA binding	IPR000910	High mobility group box, HMG1/HMG2	HMMPfam	PF00505	HMG_box	1	80,	153,	1.6e-09
36358	36186	Hypothetical			scaffold_93	-	20994	22619													9.345	8.647	29.867	0.0429	0.312887	0.798	1.08072	0.00826	0.289517	2176	DNA binding	IPR000910	High mobility group box, HMG1/HMG2	HMMPfam	PF00505	HMG_box	1	83,	152,	2.7e-05
35428	35256	Hypothetical		IVS; Possibly 2 genes (hydrolase, helicase)	scaffold_53	+	4166	9198													14.297	25.473	4.518	0.0336	3.16445	0.0206	0.561261	0.00598	5.63811	2176	DNA binding	IPR000330	SNF2-related	HMMPfam	PF00176	SNF2_N	1	138,	435,	3.8e-11	3.6.1.3	Adenosinetriphosphatase.	ATP + H(2)O = ADP + phosphate.	\N	Purine metabolism	Nucleotide Metabolism	METABOLIC
420085	419913	Hypothetical			scaffold_6	-	342367	343071													15.827	19.923	5.146	0.0212	3.07559	0.213	0.794408	0.00548	3.87155	2175	nucleic acid binding	IPR015880	Zinc finger, C2H2-like	HMMSmart	SM00355	no description	4	6,54,80,110,	29,79,103,133,	0.025,14,27,0.94
20744	20572	Hypothetical	TMH		scaffold_285	+	4151	5148													19.25	38.954	32.442	0.149	0.593367	0.0112	0.494173	0.516	1.20073	2175	nucleic acid binding	IPR011545	DNA/RNA helicase, DEAD/DEAH box type, N-terminal	HMMPfam	PF00270	DEAD	1	50,	110,	1.6e-12
60559	60387	Hypothetical	IVS		scaffold_60	+	64496	65345													94.419	29.041	39.252	0.203	2.40546	0.0156	3.25123	0.672	0.73986	2175	nucleic acid binding	IPR007087	Zinc finger, C2H2-type	HMMPfam	PF00096	zf-C2H2	1	30,	56,	0.0083
19713	19541	Hypothetical		51aa	scaffold_89	-	82944	83433													134.973	92.908	26.228	0.025	5.14614	0.265	1.45276	0.0469	3.54232	2175	nucleic acid binding	IPR007087	Zinc finger, C2H2-type	HMMPfam	PF00096	zf-C2H2	1	25,	50,	5.7e-05
486419	486247	Hypothetical			scaffold_97	+	85892	87591													21.996	19.016	6.589	0.0102	3.33829	0.384	1.15671	0.0223	2.88602	2175	nucleic acid binding	IPR007087	Zinc finger, C2H2-type	ScanRegExp	PS00028	ZINC_FINGER_C2H2_1	1	87,	107,	NA
45142	44970	Hypothetical	69aa, Zn finger		scaffold_7	-	344458	344720													157.379	140.5	14.788	0.00125	10.6423	0.709	1.12014	0.00352	9.50095	2175	nucleic acid binding	IPR007087	Zinc finger, C2H2-type	BlastProDom	PD000003	Q9P413_SCLSC_Q9P413;	1	47,	69,	0.0003
125137	124965	Hypothetical		Possible Zn finger	scaffold_10	+	223670	225684													121.821	109.688	25.051	0.0483	4.86292	0.385	1.11061	0.0457	4.37859	2175	nucleic acid binding	IPR007087	Zinc finger, C2H2-type	ProfileScan	PS50157	ZINC_FINGER_C2H2_2	1	182,	205,	9.556
379715	379543	Hypothetical			scaffold_424	+	1545	2981													10.311	12.327	3.662	0.033	2.81567	0.257	0.836457	0.0206	3.36619	2175	nucleic acid binding	IPR007087	Zinc finger, C2H2-type	HMMPfam	PF00096	zf-C2H2	1	58,	80,	0.003
325965	325793	Hypothetical			scaffold_294	+	161	2288													7.15	8.549	2.254	0.00771	3.17214	0.219	0.836355	0.00606	3.79281	2175	nucleic acid binding	IPR007087	Zinc finger, C2H2-type	HMMPfam	PF00096	zf-C2H2	1	3,	27,	0.0073
425462	425290	Hypothetical			scaffold_63	-	43824	45607													5.645	6.945	9.235	0.122	0.611262	0.296	0.812815	0.329	0.75203	2175	nucleic acid binding	IPR007087	Zinc finger, C2H2-type	HMMPfam	PF00096	zf-C2H2	2	267,295,	289,319,	0.00036,1.4e-06
372854	372682	Hypothetical	SS		scaffold_40	-	52586	54228													19.442	26.397	16.221	0.622	1.19857	0.254	0.736523	0.139	1.62733	2175	nucleic acid binding	IPR007087	Zinc finger, C2H2-type	HMMPfam	PF00096	zf-C2H2	2	224,252,	246,276,	5.3e-07,4.9e-07
24935	24763	Hypothetical		57aa	scaffold_89	-	73356	73595													4.822	13.07	1.761	0.03	2.73822	0.00141	0.368936	0.00162	7.42192	2175	nucleic acid binding	IPR007087	Zinc finger, C2H2-type	HMMPfam	PF00096	zf-C2H2	1	19,	41,	2.8e-06
114084	113912	Hypothetical			scaffold_4	-	114564	116767													15.46	10.254	5.345	0.0426	2.89242	0.0207	1.5077	0.0999	1.91843	2175	nucleic acid binding	IPR004365	Nucleic acid binding, OB-fold, tRNA/helicase-type	HMMPfam	PF01336	tRNA_anti	1	83,	190,	0.42
74136	73964	Hypothetical		Possible exonuclease	scaffold_101	+	77165	79078													7.704	2.072	2.703	0.0242	2.85017	0.000298	3.71815	0.333	0.766556	2175	nucleic acid binding	IPR002562	3'-5' exonuclease	HMMPfam	PF01612	3_5_exonuc	1	215,	314,	6.1e-10
333923	333751	Hypothetical			scaffold_30	+	69536	70925													242.074	245.36	115.198	0.0415	2.10137	0.921	0.986607	0.0385	2.1299	2175	nucleic acid binding	IPR002562	3'-5' exonuclease	HMMPfam	PF01612	3_5_exonuc	1	16,	126,	0.00023
88122	87950	Hypothetical			scaffold_40	-	77467	77992													34.62	31.549	11.394	0.0479	3.03844	0.628	1.09734	0.0487	2.76891	2175	nucleic acid binding	IPR001222	Zinc finger, TFIIS-type	HMMPfam	PF01096	TFIIS_C	1	66,	104,	6.4e-17	2.7.7.6	DNA-directed RNA polymerase.	N nucleoside triphosphate = N diphosphate + {RNA}(N).	\N	RNA polymerase	TRANSCRIPTION	REGULATORY
22499	22327	Hypothetical			scaffold_18	+	176322	179475													237.653	274.973	87.44	0.0242	2.7179	0.458	0.864278	0.0254	3.1447	2175	nucleic acid binding	IPR000504	RNA recognition motif, RNP-1	HMMPfam	PF00076	RRM_1	1	770,	840,	7.1e-07	3.2.1.3	Glucan 1,4-alpha-glucosidase.	Hydrolysis of terminal 1,4-linked alpha-D-glucose residues successively from non-reducing ends of the chains with release of beta-D-glucose.	\N	Starch and sucrose metabolism	Metabolism of Complex Carbohydrates	METABOLIC
113458	113286	Hypothetical			scaffold_1	+	105616	107125													122.817	163.137	17.284	0.0192	7.10582	0.0997	0.752846	0.0117	9.43861	2175	nucleic acid binding	IPR000504	RNA recognition motif, RNP-1	HMMPfam	PF00076	RRM_1	2	6,105,	69,172,	1.6e-07,1.6e-06
77966	77794	Hypothetical		Posssible phenyl-cysteine lyase	scaffold_185	-	45706	47715													154.257	175.767	66.466	0.0461	2.32084	0.329	0.877622	0.0316	2.64446	951	prenylcysteine oxidase activity	IPR010795	Prenylcysteine lyase	HMMPfam	PF07156	Prenylcys_lyase	1	152,	520,	1.2e-14
46053	45881	Hypothetical			scaffold_328	-	14701	14871													------	------	------	NaN	#VALUE!	NaN	#VALUE!	NaN	#VALUE!	586	chromatin	IPR000953	Chromo domain	HMMPfam	PF00385	Chromo	1	21,	52,	8.3e-09
105348	105176	Hypothetical			scaffold_53	+	75537	77089													14.407	10.672	6.257	0.139	2.30254	0.0821	1.34998	0.278	1.70561	586	chromatin	IPR000116	High mobility group proteins HMG-I and HMG-Y	BlastProDom	PD005593	Q6W8X3_CHICK_Q6W8X3;	1	134,	201,	0.002
122005	121833	Hypothetical			scaffold_193	+	32891	33228													0.307	0.412	0.488	0.539	0.629098	NaN	0.745146	NaN	0.844262	576	chromosome, pericentric region	IPR008685	Mis12	HMMPfam	PF05859	Mis12	1	13,	101,	5.1e-14
118527	118355	Hypothetical		72 aa, IVS	scaffold_66	+	3593	4332													132.479	10.978	28.104	0.106	4.71388	6.13e-05	12.0677	0.261	0.390621	573	mating pheromone activity	IPR012597	Fungal mating-type pheromone	HMMPfam	PF08015	Pheromone	1	33,	70,	0.0082
31637	31465	Hypothetical	possible exonuclease		scaffold_145	+	36042	37334													33.133	13.296	17.351	0.137	1.90957	0.0015	2.49195	0.496	0.766296	171	3'-5'-exoribonuclease activity	IPR016027	Nucleic acid-binding, OB-fold-like	superfamily	SSF50249	Nucleic acid-binding proteins	1	98,	183,	0.00013	3.1.13.-	Exoribonucleases producing 5'-phosphomonoesters.	\N	\N	\N	\N	\N
33813	33641	Hypothetical			scaffold_13	-	146268	147805													11.487	3.762	4.978	0.0681	2.30755	0.0047	3.05343	0.497	0.755725	153	rRNA modification	IPR001737	Ribosomal RNA adenine methylase transferase	HMMPfam	PF00398	RrnaAD	1	51,	352,	2.2e-05
22063	21891	Hypothetical	TMHs		scaffold_12	+	58733	60905													63.322	52.676	22.715	0.0396	2.78767	0.637	1.2021	0.125	2.319			IPR016196	MFS general substrate transporter	superfamily	SSF103473	MFS general substrate transporter	1	106,	598,	3.4e-19
25358	25186	Hypothetical	TMHs		scaffold_112	+	51863	54355													13.631	20.302	4.334	0.0389	3.14513	0.0439	0.671412	0.0137	4.68436			IPR016196	MFS general substrate transporter	superfamily	SSF103473	MFS general substrate transporter	2	36,153,	145,368,	5.4e-13,8.2e-18
15644	15472	Hypothetical			scaffold_152	-	55482	56596													0.327	0.209	0.795	NaN	0.411321	0.357	1.56459	NaN	0.262893			IPR016181	Acyl-CoA N-acyltransferase	superfamily	SSF55729	Acyl-CoA N-acyltransferases (Nat)	1	3,	209,	1.8e-09
125785	125613	Hypothetical	TMHs		scaffold_18	+	191449	192902													38.617	25.578	11.764	0.0212	3.28264	0.136	1.50977	0.0469	2.17426			IPR016137	Regulator of G protein signalling superfamily	superfamily	SSF48097	Regulator of G-protein signaling, RGS	1	33,	243,	1.7e-10
35004	34832	Hypothetical			scaffold_38	+	140767	144883													11.778	10.883	3.482	0.0343	3.38254	0.737	1.08224	0.0315	3.1255			IPR016027	Nucleic acid-binding, OB-fold-like	superfamily	SSF50249	Nucleic acid-binding proteins	1	418,	577,	2.3e-16
28354	28182	Hypothetical	TMHs		scaffold_12	-	237929	239481													267.607	238.91	116.819	0.0241	2.29078	0.422	1.12012	0.0385	2.04513			IPR015414	SNARE associated Golgi protein	HMMPfam	PF09335	SNARE_assoc	1	147,	269,	1.6e-14
28218	28046	Hypothetical			scaffold_11	-	22713	24942													20.414	17.747	5.61	0.0153	3.63886	0.358	1.15028	0.0224	3.16346			IPR013964	DASH complex, subunit Ask1	HMMPfam	PF08655	DASH_Ask1	1	39,	104,	1.3e-22
12799	12627	Hypothetical			scaffold_43	+	100522	101640													38.02	58.666	15.585	0.0232	2.43953	0.0181	0.648076	0.00725	3.76426			IPR013960	DASH complex, subunit Duo1	HMMPfam	PF08651	DASH_Duo1	1	116,	193,	1.2e-10
80779	80607	Hypothetical			scaffold_359	-	20	672													80.818	78.92	29.553	0.0293	2.73468	0.883	1.02405	0.0294	2.67046			IPR013922	Cyclin-related 2	HMMPfam	PF08613	Cyclin	1	19,	152,	1.4e-29
23772	23600	Hypothetical		lg IVS	scaffold_45	+	51410	54342													44.138	42.188	17.997	0.163	2.45252	0.697	1.04622	0.167	2.34417			IPR013745	HbrB-like	HMMPfam	PF08539	HbrB	1	136,	240,	8.4e-17
31842	31670	Hypothetical			scaffold_166	-	12297	15680													44.055	28.243	14.857	0.0268	2.96527	0.0275	1.55986	0.0755	1.90099			IPR013724	Spa2 homology (SHD) of GIT	HMMPfam	PF08518	GIT_SHD	1	68,	98,	1.8e-05
106029	105857	Hypothetical	TMHs		scaffold_63	+	42964	43328													34.202	10.281	61.632	0.473	0.554939	0.0145	3.32672	0.0766	0.166813			IPR013717	PIG-P	HMMPfam	PF08510	PIG-P	1	19,	104,	1.4e-05
59567	59395	Hypothetical		74 aa	scaffold_169	+	24532	24753													1.679	0.647	4.173	NaN	0.402348	NaN	2.59505	NaN	0.155044			IPR013595	Peptidase S33, tripeptidyl-peptidase C-terminal	HMMPfam	PF08386	Abhydrolase_4	1	1,	71,	4.2e-05
24501	24329	Hypothetical			scaffold_70	+	86205	87919													25.89	21.524	5.893	0.012	4.39335	0.195	1.20284	0.0179	3.65247			IPR013253	Kinetochore Spc7	HMMPfam	PF08317	Spc7	1	1,	278,	5.2e-11
57530	57358	Hypothetical			scaffold_235	-	10958	11253													------	------	------	NaN	#VALUE!	NaN	#VALUE!	NaN	#VALUE!			IPR013129	Transcription factor jumonji	HMMPfam	PF02373	JmjC	1	19,	60,	6.7e-11
75820	75648	Hypothetical		Possible Mannose-6-phosphate isomerase	scaffold_131	+	12976	13667													621.679	487.986	24.013	0.0406	25.8893	0.279	1.27397	0.039	20.3217			IPR013096	Cupin 2, conserved barrel	HMMPfam	PF07883	Cupin_2	1	30,	99,	1.5e-15
25356	25184	Hypothetical			scaffold_112	+	38408	38877													24.226	42.59	8.129	0.0378	2.98019	0.125	0.568819	0.0122	5.23927			IPR013096	Cupin 2, conserved barrel	HMMPfam	PF07883	Cupin_2	1	73,	130,	3.5e-05
32155	31983	Hypothetical			scaffold_203	-	5131	6907													21.716	15.172	7.644	0.0332	2.84092	0.0597	1.43132	0.0634	1.98482			IPR013026	Tetratricopeptide region	HMMSmart	SM00028	no description	2	45,205,	78,238,	81,0.86
125488	125316	Hypothetical			scaffold_14	-	186368	188357													139.814	200.92	35.444	0.00855	3.94465	0.0604	0.695869	0.00208	5.66866			IPR012808	Conserved hypothetical protein CHP02453	HMMTigr	TIGR02453	TIGR02453: conserved hypothetical protein T	1	150,	403,	4.9e-46
20113	19941	Hypothetical			scaffold_133	+	13692	15887													113.014	131.817	34.787	0.0225	3.24874	0.262	0.857355	0.0142	3.78926			IPR012535	Cell division control 14, SIN component	HMMPfam	PF08045	CDC14	1	1,	276,	1.3e-11
124500	124328	Hypothetical			scaffold_4	-	196166	196873													58.451	87.084	40.403	0.212	1.4467	0.155	0.671203	0.0574	2.15538			IPR012338	Beta-lactamase-type transpeptidase fold	superfamily	SSF56601	beta-lactamase/transpeptidase-like	1	75,	122,	0.01
70761	70589	Hypothetical	related to thioredoxin		scaffold_55	-	32311	32722													9.314	33.702	4.097	0.225	2.27337	0.000392	0.276363	0.0324	8.22602			IPR012336	Thioredoxin-like fold	superfamily	SSF52833	Thioredoxin-like	1	6,	102,	4.2e-09
20049	19877	Hypothetical			scaffold_123	-	81005	82275													57.369	11.832	30.822	0.448	1.8613	0.00716	4.84863	0.253	0.383882			IPR012312	Hemerythrin/HHE cation-binding motif	HMMPfam	PF01814	Hemerythrin	1	19,	80,	8.6e-06
219382	219210	Hypothetical			scaffold_16	-	64433	66355													22.646	17.865	17.457	0.244	1.29724	0.121	1.26762	0.93	1.02337			IPR011053	Single hybrid motif	superfamily	SSF51230	Single hybrid motif	1	439,	498,	0.0081
34990	34818	Hypothetical			scaffold_38	-	65602	67892													64.636	54.16	20.369	0.0176	3.17325	0.18	1.19343	0.0273	2.65894			IPR011051	Cupin, RmlC-type	superfamily	SSF51182	RmlC-like cupins	1	481,	576,	2.9e-11
37633	37461	Hypothetical			scaffold_181	-	49743	52160													9.421	3.036	3.237	0.103	2.91041	0.00174	3.1031	0.916	0.937905			IPR011009	Protein kinase-like	superfamily	SSF56112	Protein kinase-like (PK-like)	1	104,	197,	1.2e-08
127549	127377	Hypothetical			scaffold_52	-	66490	67859													28.54	10.991	4.831	0.017	5.90768	0.0161	2.59667	0.101	2.2751			IPR011009	Protein kinase-like	superfamily	SSF56112	Protein kinase-like (PK-like)	1	41,	139,	0.00097
39085	38913	Hypothetical			scaffold_38	+	58392	58655													5.254	11.478	4.159	0.479	1.26328	0.0276	0.457745	0.0351	2.7598			IPR011008	Dimeric alpha-beta barrel	superfamily	SSF54909	Dimeric alpha+beta barrel	1	22,	84,	0.016
455103	454931	Hypothetical	TMHs		scaffold_8	+	42010	42824													15.144	37.204	12.252	0.901	1.23604	0.0155	0.407053	0.466	3.03657			IPR010916	TonB box, conserved site	ScanRegExp	PS00430	TONB_DEPENDENT_REC_1	1	1,	23,	NA
27906	27734	Hypothetical	TMH; SS or 5'TMHs		scaffold_7	-	126209	130190													141.991	200.095	10.379	0.00172	13.6806	0.0446	0.709618	0.00085	19.2788			IPR010816	Heterokaryon incompatibility Het-C	HMMPfam	PF07217	Het-C	1	1,	600,	2.9e-144
68184	68012	Hypothetical			scaffold_32	-	127489	128355													16.375	36.107	58.533	0.0196	0.279757	0.00233	0.453513	0.137	0.616866			IPR010371	Protein of unknown function DUF967	BlastProDom	PD034764	Q6FX43_EEEEE_Q6FX43;	1	32,	174,	8e-06
64138	63966	Hypothetical			scaffold_10	-	218249	218903													409.338	254.57	147.842	0.257	2.76875	0.0883	1.60796	0.525	1.72191			IPR009783	Protein of unknown function DUF1348	HMMPfam	PF07080	DUF1348	1	6,	152,	7.2e-55
306755	306583	Hypothetical	SS	Possible purine permease	scaffold_259	+	12598	14327													38.447	48.474	7.495	0.00439	5.12969	0.364	0.793147	0.00731	6.46751			IPR009486	Purine nucleoside permease	HMMPfam	PF06516	NUP	1	26,	347,	6.6e-118
124952	124780	Hypothetical			scaffold_9	-	1077	2559													37.166	41.351	12.969	0.0169	2.86576	0.76	0.898793	0.0475	3.18845			IPR009292	Protein of unknown function DUF947	HMMPfam	PF06102	DUF947	1	190,	371,	3.8e-23
416255	416083	Hypothetical			scaffold_59	-	110799	112461													11.099	6.743	3.88	0.0452	2.86057	0.136	1.646	0.131	1.73789			IPR009057	Homeodomain-like	superfamily	SSF46689	Homeodomain-like	1	132,	233,	0.00025
114720	114548	Hypothetical			scaffold_9	-	114302	115869													140.934	116.234	48.342	0.0109	2.91535	0.195	1.2125	0.0262	2.40441			IPR009057	Homeodomain-like	superfamily	SSF46689	Homeodomain-like	1	335,	392,	0.0012
375783	375611	Hypothetical		64aa	scaffold_41	-	70331	70628													7.55	14.713	3.816	0.0728	1.97851	0.04	0.513152	0.00937	3.85561			IPR009027	Ribosomal protein L9 N-terminal-like	superfamily	SSF55658	L9 N-domain-like	1	13,	39,	0.0044
167901	167729	Hypothetical	SS		scaffold_116	+	54407	55647													1.744	2.515	2.38	0.275	0.732773	0.0861	0.693439	0.846	1.05672			IPR008997	Ricin B-related lectin	superfamily	SSF50370	Ricin B-like lectins	1	32,	159,	4.5e-09
34052	33880	Hypothetical	TMH		scaffold_17	+	201879	202876													108.353	100.245	30.492	0.0329	3.55349	0.59	1.08088	0.0325	3.28758			IPR008972	Cupredoxin	superfamily	SSF49503	Cupredoxins	1	17,	140,	8.9e-09
18978	18806	Hypothetical	SS		scaffold_36	+	174812	176056													1523.48	1579.19	5487.67	0.00667	0.27762	0.844	0.964723	0.0105	0.287771			IPR008972	Cupredoxin	superfamily	SSF49503	Cupredoxins	1	15,	136,	1.5e-17
113037	112865	Hypothetical			scaffold_318	-	5300	6224													33.182	45.235	10.651	0.0104	3.11539	0.182	0.733547	0.0148	4.24702			IPR008914	Phosphatidylethanolamine-binding protein PEBP	BlastProDom	PD004330	Q6CFV4_EEEEE_Q6CFV4;	1	18,	207,	2e-18
34757	34585	Hypothetical	SS		scaffold_32	-	106459	107930													35.515	23.341	7.753	0.0114	4.58081	0.101	1.52157	0.0321	3.01058			IPR008754	Peptidase M43B, pregnancy-associated plasma-A	HMMPfam	PF05572	Peptidase_M43	1	210,	224,	0.00027
275664	275492	Hypothetical	DUF862		scaffold_211	-	30120	31146													34.639	74.219	13.356	0.274	2.59352	0.0316	0.466713	0.0781	5.55698			IPR008580	Protein of unknown function DUF862, eukaryotic	HMMPfam	PF05903	DUF862	1	25,	163,	4.5e-42
36596	36424	Hypothetical	TMH		scaffold_105	+	74110	75690													38.46	34.795	10.743	0.0256	3.58001	0.479	1.10533	0.0256	3.23885			IPR008547	Protein of unknown function DUF829, eukaryotic	HMMPfam	PF05705	DUF829	1	241,	304,	1.5e-07
410903	410731	Hypothetical			scaffold_55	+	116683	117814													36.044	14.572	9.968	0.0378	3.61597	0.00127	2.47351	0.347	1.46188			IPR008501	Protein of unknown function DUF783	HMMPfam	PF05615	DUF783	1	69,	159,	4.4e-09
16303	16131	Hypothetical	ss/wsc		scaffold_199	-	36306	37048													788.291	350.999	105.772	0.229	7.45274	0.0177	2.24585	0.433	3.31845			IPR008427	Extracellular membrane protein, 8-cysteine region, CFEM	HMMPfam	PF05730	CFEM	1	27,	91,	7e-12
109046	108874	Hypothetical			scaffold_120	-	39835	40605													40.246	48.477	37.717	0.849	1.06705	0.481	0.830208	0.526	1.28528			IPR007853	Zinc finger, Zim17-type	HMMPfam	PF05180	zf-DNL	1	89,	161,	8.7e-30
423296	423124	Hypothetical	TMHs		scaffold_61	-	105796	106659													25.158	24.969	13.671	0.235	1.84025	0.985	1.00757	0.242	1.82642			IPR007667	Hypoxia induced protein conserved region	HMMPfam	PF04588	HIG_1_N	1	8,	80,	1.5e-13
20599	20427	Hypothetical		DUF572	scaffold_224	-	36430	37608													164.988	192.1	77.521	0.0332	2.1283	0.427	0.858865	0.0296	2.47804			IPR007590	Protein of unknown function DUF572	HMMPfam	PF04502	DUF572	1	1,	291,	3.9e-91
516206	516034	Hypothetical			scaffold_88	-	12103	13390													13.437	10.925	4.854	0.0181	2.76823	0.451	1.22993	0.0782	2.25072			IPR007529	Zinc finger, HIT-type	HMMPfam	PF04438	zf-HIT	1	5,	35,	6.1e-07
119865	119693	Hypothetical	TMHs	Distantly related to tyrosine phosphatase	scaffold_102	+	57189	58169													4.696	0.461	2.493	0.554	1.88367	0.0207	10.1866	0.182	0.184918			IPR007482	Protein-tyrosine phosphatase-like, PTPLA	HMMPfam	PF04387	PTPLA	1	108,	260,	7.2e-54
87867	87695	Hypothetical			scaffold_37	-	131664	133052													31.259	16.341	10.667	0.0133	2.93044	0.0259	1.91292	0.157	1.53192			IPR007149	Leo1-like protein	HMMPfam	PF04004	Leo1	1	74,	368,	9.2e-11
101132	100960	Hypothetical			scaffold_16	-	77780	80723													29.582	18.208	9.237	0.019	3.20255	0.0197	1.62467	0.0602	1.9712			IPR006994	Basic helix-loop-helix, Nulp1-type	HMMPfam	PF04910	DUF654	1	252,	677,	1.1e-38
111805	111633	Hypothetical	TMHs		scaffold_215	+	22290	24150													67.559	106.623	53.028	0.357	1.27403	0.107	0.633625	0.0649	2.01069			IPR006769	Protein of unknown function DUF607	HMMPfam	PF04678	DUF607	1	154,	339,	9.9e-10
126132	125960	Hypothetical			scaffold_24	-	22317	24094													271.273	258.465	20.118	0.0224	13.4841	0.853	1.04955	0.0234	12.8475			IPR006671	Cyclin, N-terminal	HMMPfam	PF00134	Cyclin_N	1	60,	185,	0.00055
93034	92862	Hypothetical	TMHs		scaffold_122	+	48120	50407													65.72	64.813	33.124	0.0584	1.98406	0.95	1.01399	0.0477	1.95668			IPR006626	Parallel beta-helix repeat	HMMSmart	SM00710	no description	6	121,181,210,233,266,321,	151,209,232,258,308,343,	7.6e+02,4.1e+03,8.1,3.5e+03,8.5e+03,1.3e+02
26694	26522	Hypothetical		poor model	scaffold_229	+	1406	1987													81.391	101.142	27.933	0.0183	2.91379	0.209	0.80472	0.0141	3.62088			IPR006597	Sel1-like	HMMPfam	PF08238	Sel1	2	55,91,	90,126,	1.4e-06,4.4e-09
29742	29570	Hypothetical		possible RNA polymerase	scaffold_43	-	77009	79404													65.72	67.782	22.445	0.0311	2.92805	0.88	0.969579	0.0342	3.01992			IPR005607	BSD	HMMPfam	PF03909	BSD	1	222,	286,	1.9e-11
104184	104012	Hypothetical		117aa	scaffold_39	+	62366	62909													23.909	46.554	1.683	0.0191	14.2062	0.079	0.513576	0.0114	27.6613			IPR005545	YCII-related	HMMPfam	PF03795	YCII	1	18,	109,	1.3e-07
72165	71993	Hypothetical			scaffold_71	+	3407	4570													25.089	27.298	8.767	0.0428	2.86175	0.692	0.919078	0.0376	3.11372			IPR005123	2OG-Fe(II) oxygenase	HMMPfam	PF03171	2OG-FeII_Oxy	1	94,	192,	5.6e-06
99478	99306	Hypothetical			scaffold_8	+	24575	26013													29.025	36.785	11.397	0.0719	2.54672	0.136	0.789044	0.0414	3.2276			IPR004919	Protein of unknown function DUF262	HMMPfam	PF03235	DUF262	1	11,	159,	8.6e-06
66877	66705	Hypothetical	TMHs		scaffold_23	+	140791	142238													83.311	80.388	26.1	0.0298	3.19199	0.785	1.03636	0.0285	3.08			IPR004853	Protein of unknown function DUF250	HMMPfam	PF03151	TPT	1	186,	414,	1e-16
51673	51501	Hypothetical			scaffold_3	+	192851	193321													17.467	7.938	14.371	0.664	1.21543	0.0138	2.20043	0.169	0.552362			IPR004046	Glutathione S-transferase, C-terminal	HMMPfam	PF00043	GST_C	1	56,	116,	1.3e-09
123497	123325	Hypothetical			scaffold_348	-	361	3058													0.024	0.074	------	NaN	#VALUE!	NaN	0.324324	NaN	#VALUE!			IPR004019	YLP motif	HMMPfam	PF02757	YLP	1	338,	346,	1.6
10327	10155	Hypothetical			scaffold_3	-	359159	366665													------	------	------	NaN	#VALUE!	NaN	#VALUE!	NaN	#VALUE!			IPR003903	Ubiquitin interacting motif	HMMPfam	PF02809	UIM	2	720,790,	737,807,	0.25,1.5
182570	182398	Hypothetical			scaffold_128	+	2865	4065													10.115	12.39	7.152	0.218	1.41429	0.272	0.816384	0.0929	1.73238			IPR003877	SPla/RYanodine receptor SPRY	HMMPfam	PF00622	SPRY	1	39,	100,	2.2e-07
32488	32316	Hypothetical			scaffold_266	+	10497	11526													186.75	191.011	58.703	0.0394	3.18127	0.919	0.977692	0.0349	3.25385			IPR003779	Carboxymuconolactone decarboxylase	HMMPfam	PF02627	CMD	1	39,	130,	5.9e-07
505962	505790	Hypothetical	ss		scaffold_328	+	8563	11392													------	------	------	NaN	#VALUE!	NaN	#VALUE!	NaN	#VALUE!			IPR003347	Transcription factor jumonji/aspartyl beta-hydroxylase	ProfileScan	PS51184	JMJC	1	435,	621,	14.596
126553	126381	Hypothetical			scaffold_30	+	144266	145177													74.508	172.469	27.738	0.154	2.68613	0.0313	0.432008	0.0433	6.21779			IPR003347	Transcription factor jumonji/aspartyl beta-hydroxylase	ProfileScan	PS51184	JMJC	1	61,	244,	20.455
36473	36301	Hypothetical			scaffold_99	-	25203	27583													15.336	14.311	10.351	0.173	1.4816	0.617	1.07162	0.242	1.38257			IPR003323	Ovarian tumour, otubain	HMMPfam	PF02338	OTU	1	52,	221,	4.4e-19
57725	57553	Hypothetical			scaffold_190	+	8261	11022													13.718	36.906	2.409	0.00611	5.69448	0.0197	0.371701	0.00283	15.32			IPR003006	Immunoglobulin/major histocompatibility complex, conserved site	ScanRegExp	PS00290	IG_MHC	1	394,	400,	NA
490655	490483	Hypothetical			scaffold_11	-	19879	22209													13.698	17.582	3.863	0.0398	3.54595	0.248	0.779092	0.0289	4.55138			IPR002791	Protein of unknown function DUF89	HMMPfam	PF01937	DUF89	1	70,	481,	2.8e-82
18096	17924	Hypothetical		DUF1771	scaffold_8	-	12098	12927													18.118	4.821	6.626	0.325	2.73438	0.00522	3.75814	0.745	0.727588			IPR002625	Smr protein/MutS2 C-terminal	HMMPfam	PF01713	Smr	1	58,	134,	1.3e-19
36985	36813	Hypothetical			scaffold_130	+	16213	16757													9.206	1.064	3.225	0.508	2.85457	0.00263	8.65226	0.464	0.329922			IPR002110	Ankyrin	FPrintScan	PR01415	ANKYRIN	2	68,80,	80,92,	0.015,0.015
55809	55637	Hypothetical			scaffold_49	-	47623	47872													16.633	7.849	13.933	0.458	1.19378	0.0451	2.11912	0.145	0.563339			IPR002110	Ankyrin	FPrintScan	PR01415	ANKYRIN	2	25,37,	37,49,	0.00018,0.00018
291214	291042	Hypothetical			scaffold_231	-	22050	23743													26.366	15.043	6.203	0.035	4.25052	0.0678	1.75271	0.0864	2.42512			IPR002110	Ankyrin	superfamily	SSF48403	Ankyrin repeat	1	29,	95,	0.0017
71487	71315	Hypothetical		118aa	scaffold_63	+	82332	82801													25.649	10.056	19.228	0.501	1.33394	0.00897	2.55062	0.144	0.522987			IPR001849	Pleckstrin-like	ProfileScan	PS50003	PH_DOMAIN	1	1,	66,	6.719
16646	16474	Hypothetical			scaffold_231	+	17871	19090													77.624	34.959	11.029	0.0871	7.03817	0.00469	2.22043	0.214	3.16973			IPR001810	Cyclin-like F-box	HMMPfam	PF00646	F-box	1	53,	100,	0.01
126612	126440	Hypothetical			scaffold_31	-	140087	141590													27.452	13.035	8.137	0.0959	3.37372	0.00282	2.10602	0.414	1.60194			IPR001810	Cyclin-like F-box	HMMPfam	PF00646	F-box	1	36,	83,	0.0004
10005	9833	Hypothetical			scaffold_1	+	317166	318062													28.452	24.158	5.953	0.0383	4.77944	0.634	1.17775	0.0558	4.05812			IPR001810	Cyclin-like F-box	HMMPfam	PF00646	F-box	1	3,	52,	0.47
129557	129385	Hypothetical			scaffold_131	-	44054	46751													18.389	15.755	5.657	0.0175	3.25066	0.348	1.16719	0.0261	2.78505			IPR001810	Cyclin-like F-box	HMMPfam	PF00646	F-box	1	30,	77,	0.23
104689	104517	Hypothetical			scaffold_45	-	68097	69876													54.017	47.62	25.124	0.0319	2.15002	0.336	1.13433	0.0426	1.8954			IPR001810	Cyclin-like F-box	HMMPfam	PF00646	F-box	1	31,	78,	8e-07
84712	84540	Hypothetical			scaffold_14	-	233055	235416													79.253	70.438	33.197	0.0479	2.38735	0.355	1.12515	0.0569	2.12182			IPR001810	Cyclin-like F-box	HMMPfam	PF00646	F-box	1	76,	126,	0.088
129901	129729	Hypothetical			scaffold_149	+	40748	42432													28.556	25.74	24.701	0.566	1.15607	0.524	1.1094	0.881	1.04206			IPR001810	Cyclin-like F-box	HMMPfam	PF00646	F-box	1	46,	105,	0.0099
241830	241658	Hypothetical			scaffold_18	+	231458	232089													22.716	22.296	5.973	0.0407	3.80311	0.928	1.01884	0.0319	3.7328			IPR001810	Cyclin-like F-box	HMMPfam	PF00646	F-box	1	7,	54,	0.031
28904	28732	Hypothetical			scaffold_22	+	211137	213435													32.88	32.839	28.38	0.551	1.15856	0.995	1.00125	0.564	1.15712			IPR001810	Cyclin-like F-box	HMMPfam	PF00646	F-box	1	2,	50,	0.016
487085	486913	Hypothetical	IVS		scaffold_98	+	34108	35240													22.578	50.06	12.642	0.114	1.78595	0.0269	0.451019	0.00901	3.95982			IPR001810	Cyclin-like F-box	HMMPfam	PF00646	F-box	1	98,	145,	0.00084
35069	34897	Hypothetical			scaffold_40	-	101871	102599													254.705	159.785	61.205	0.0116	4.16151	0.0177	1.59405	0.031	2.61065			IPR001763	Rhodanese-like	HMMSmart	SM00450	no description	1	6,	120,	2.3e-05
113168	112996	Hypothetical			scaffold_337	-	6700	7813													37.931	30.656	131.918	0.00704	0.287535	0.272	1.23731	0.00675	0.232387			IPR001680	WD40 repeat	BlastProDom	PD000018	Q6BUY1_EEEEE_Q6BUY1;	1	208,	241,	5e-07
45157	44985	Hypothetical			scaffold_208	+	4038	7419													16.346	16.311	5.633	0.0143	2.90183	0.99	1.00215	0.0123	2.89562			IPR001680	WD40 repeat	ScanRegExp	PS00678	WD_REPEATS_1	1	629,	643,	NA
28741	28569	Hypothetical			scaffold_20	-	12175	14535													19.996	42.28	7.51	0.0686	2.66258	0.0298	0.472942	0.0128	5.62983			IPR001680	WD40 repeat	HMMPfam	PF00400	WD40	2	80,326,	119,364,	2.3e-05,0.00034
222136	221964	Hypothetical			scaffold_160	-	10234	14132													8.503	20.518	3.983	0.275	2.13482	0.0254	0.414417	0.0508	5.15139			IPR001680	WD40 repeat	BlastProDom	PD000018	Q8X1P5_PODAN_Q8X1P5;	3	759,800,895,	787,831,927,	0.0002,0.0002,0.002
83994	83822	Hypothetical			scaffold_10	+	274387	275308													41.719	49.16	37.524	0.705	1.1118	0.391	0.848637	0.318	1.31009			IPR001498	Protein of unknown function UPF0029, N-terminal	HMMPfam	PF01205	UPF0029	1	26,	147,	2.1e-17
28239	28067	Hypothetical			scaffold_11	+	111526	113915													33.154	34.784	12.013	0.0293	2.75984	0.701	0.953139	0.0246	2.89553			IPR001487	Bromodomain	FPrintScan	PR00503	BROMODOMAIN	3	91,244,262,	107,262,281,	7.3e-11,7.3e-11,7.3e-11
111199	111027	Hypothetical			scaffold_185	-	41796	44091													30.568	29.371	18.762	0.112	1.62925	0.849	1.04075	0.106	1.56545			IPR001012	UBX	HMMPfam	PF00789	UBX	1	483,	521,	1.5e-06
107985	107813	Hypothetical		Fasciclin-like	scaffold_97	-	75817	76950													247.538	232.788	12.046	0.0105	20.5494	0.873	1.06336	0.0148	19.3249			IPR000782	Beta-Ig-H3/fasciclin	HMMPfam	PF02469	Fasciclin	2	35,226,	131,329,	2e-07,2.2e-18
22619	22447	Hypothetical	TMHs		scaffold_21	-	2955	5446													110.313	117.931	14.246	0.0475	7.74344	0.842	0.935403	0.0412	8.27818			IPR000408	Regulator of chromosome condensation, RCC1	ScanRegExp	PS00626	RCC1_2	1	135,	145,	NA
298786	298614	Hypothetical			scaffold_244	+	23103	24922													3.769	7.219	1.335	0.0468	2.82322	0.0241	0.522094	0.00607	5.40749			IPR000408	Regulator of chromosome condensation, RCC1	ScanRegExp	PS00626	RCC1_2	1	100,	110,	NA
80762	80590	Hypothetical			scaffold_355	+	10250	11172													27.737	22.903	10.114	0.031	2.74244	0.321	1.21106	0.0541	2.26448			IPR000286	Histone deacetylase superfamily	FPrintScan	PR01270	HDASUPER	2	8,42,	31,57,	2.1e-07,2.1e-07
34386	34214	Hypothetical		Possible Abhydrolase	scaffold_24	+	112865	114859													137.561	99.1	25.196	0.0236	5.45964	0.0747	1.3881	0.0323	3.93316			IPR000073	Alpha/beta hydrolase fold-1	HMMPfam	PF00561	Abhydrolase_1	1	62,	285,	0.001
181741	181569	Hypothetical	TMHs, 60 aa		scaffold_126	-	64138	64391													------	------	2.429	NaN	#VALUE!	NaN	#VALUE!	NaN	#VALUE!
121552	121380	Hypothetical			scaffold_168	+	52715	53206													------	------	------	NaN	#VALUE!	NaN	#VALUE!	NaN	#VALUE!
16686	16514	Hypothetical			scaffold_235	-	33973	35121													------	------	------	NaN	#VALUE!	NaN	#VALUE!	NaN	#VALUE!
16685	16513	Hypothetical			scaffold_235	+	30347	32076													------	------	------	NaN	#VALUE!	NaN	#VALUE!	NaN	#VALUE!
79240	79068	Hypothetical			scaffold_235	+	19446	21995													------	------	------	NaN	#VALUE!	NaN	#VALUE!	NaN	#VALUE!
122593	122421	Hypothetical			scaffold_235	+	2647	4014													------	------	------	NaN	#VALUE!	NaN	#VALUE!	NaN	#VALUE!
79495	79323	Hypothetical			scaffold_248	-	33149	33454													------	------	0.466	NaN	#VALUE!	NaN	#VALUE!	NaN	#VALUE!
122839	122667	Hypothetical			scaffold_255	-	29883	30862													------	------	------	NaN	#VALUE!	NaN	#VALUE!	NaN	#VALUE!
55723	55551	Hypothetical			scaffold_256	-	14036	14440													------	------	------	NaN	#VALUE!	NaN	#VALUE!	NaN	#VALUE!
16870	16698	Hypothetical			scaffold_256	-	4479	6029													------	------	------	NaN	#VALUE!	NaN	#VALUE!	NaN	#VALUE!
10328	10156	Hypothetical			scaffold_3	-	367991	368564													------	------	------	NaN	#VALUE!	NaN	#VALUE!	NaN	#VALUE!
17206	17034	Hypothetical			scaffold_309	+	13813	18478													------	0.057	------	NaN	#VALUE!	NaN	#VALUE!	NaN	#VALUE!
17205	17033	Hypothetical			scaffold_309	+	10334	13095													------	0.052	------	NaN	#VALUE!	NaN	#VALUE!	NaN	#VALUE!
58906	58734	Hypothetical			scaffold_313	+	7379	8152													------	------	------	NaN	#VALUE!	NaN	#VALUE!	NaN	#VALUE!
52633	52461	Hypothetical			scaffold_313	+	6113	6769													------	------	------	NaN	#VALUE!	NaN	#VALUE!	NaN	#VALUE!
17220	17048	Hypothetical			scaffold_313	+	1166	3909													------	------	------	NaN	#VALUE!	NaN	#VALUE!	NaN	#VALUE!
17219	17047	Hypothetical			scaffold_313	-	49	769													------	------	------	NaN	#VALUE!	NaN	#VALUE!	NaN	#VALUE!
17226	17054	Hypothetical			scaffold_314	+	18500	19789													------	------	------	NaN	#VALUE!	NaN	#VALUE!	NaN	#VALUE!
51789	51617	Hypothetical			scaffold_328	-	15022	15222													------	------	------	NaN	#VALUE!	NaN	#VALUE!	NaN	#VALUE!
17279	17107	Hypothetical			scaffold_328	-	6451	8202													------	------	------	NaN	#VALUE!	NaN	#VALUE!	NaN	#VALUE!
123499	123327	Hypothetical			scaffold_348	-	11997	12722													------	------	------	NaN	#VALUE!	NaN	#VALUE!	NaN	#VALUE!
60244	60072	Hypothetical			scaffold_348	-	6063	6613													------	0.285	------	NaN	#VALUE!	NaN	#VALUE!	NaN	#VALUE!
58620	58448	Hypothetical			scaffold_353	-	4500	4754													------	------	------	NaN	#VALUE!	NaN	#VALUE!	NaN	#VALUE!
17393	17221	Hypothetical			scaffold_362	+	3315	3989													------	------	------	NaN	#VALUE!	NaN	#VALUE!	NaN	#VALUE!
80876	80704	Hypothetical			scaffold_379	+	38	346													------	------	------	NaN	#VALUE!	NaN	#VALUE!	NaN	#VALUE!
17439	17267	Hypothetical			scaffold_381	+	352	1128													------	------	------	NaN	#VALUE!	NaN	#VALUE!	NaN	#VALUE!
123644	123472	Hypothetical			scaffold_391	-	6087	7839													------	0.142	------	NaN	#VALUE!	NaN	#VALUE!	NaN	#VALUE!
27200	27028	Hypothetical			scaffold_391	-	3489	4222													------	------	------	NaN	#VALUE!	NaN	#VALUE!	NaN	#VALUE!
123652	123480	Hypothetical			scaffold_394	-	160	863													------	0.613	------	NaN	#VALUE!	NaN	#VALUE!	NaN	#VALUE!
17476	17304	Hypothetical			scaffold_398	+	5504	7176													------	------	------	NaN	#VALUE!	NaN	#VALUE!	NaN	#VALUE!
81011	80839	Hypothetical		lg IVS	scaffold_416	+	1619	4302													------	------	------	NaN	#VALUE!	NaN	#VALUE!	NaN	#VALUE!
17544	17372	Hypothetical			scaffold_434	-	771	1809													------	------	------	NaN	#VALUE!	NaN	#VALUE!	NaN	#VALUE!
39635	39463	Hypothetical	TMHs		scaffold_51	+	56419	56858													------	------	------	NaN	#VALUE!	NaN	#VALUE!	NaN	#VALUE!
121006	120834	Hypothetical		very small model	scaffold_142	-	70275	70493													0.462	------	0.448	NaN	1.03125	NaN	#VALUE!	NaN	#VALUE!
174645	174473	Hypothetical			scaffold_12	-	257514	258156													0.436	------	0.5	0.847	0.872	NaN	#VALUE!	NaN	#VALUE!
54985	54813	Hypothetical			scaffold_191	-	16316	16675													0.37	------	------	NaN	#VALUE!	NaN	#VALUE!	NaN	#VALUE!
333638	333466	Hypothetical			scaffold_30	-	54454	55082													0.261	------	0.303	0.827	0.861386	NaN	#VALUE!	NaN	#VALUE!
43112	42940	Hypothetical			scaffold_455	-	695	1187													0.234	------	------	NaN	#VALUE!	NaN	#VALUE!	NaN	#VALUE!
119715	119543	Hypothetical		very small model	scaffold_97	+	71502	71793													0.226	------	0.293	NaN	0.771331	NaN	#VALUE!	NaN	#VALUE!
481851	481679	Hypothetical			scaffold_93	+	95206	95968													0.159	------	0.187	NaN	0.850267	NaN	#VALUE!	NaN	#VALUE!
51969	51797	Hypothetical			scaffold_362	-	488	1156													0.121	------	------	NaN	#VALUE!	NaN	#VALUE!	NaN	#VALUE!
78269	78097	Hypothetical			scaffold_196	+	17531	18040													0.119	------	0.323	0.071	0.368421	NaN	#VALUE!	NaN	#VALUE!
119755	119583	Hypothetical	TMHs		scaffold_99	-	7065	8045													0.111	------	0.213	0.288	0.521127	NaN	#VALUE!	NaN	#VALUE!
510334	510162	Hypothetical			scaffold_495	-	561	2293													0.067	------	0.071	0.907	0.943662	NaN	#VALUE!	NaN	#VALUE!
17547	17375	Hypothetical	tmh		scaffold_435	+	2726	3866													0.053	------	------	NaN	#VALUE!	NaN	#VALUE!	NaN	#VALUE!
42504	42332	Hypothetical			scaffold_328	+	2480	4022													0.051	------	------	NaN	#VALUE!	NaN	#VALUE!	NaN	#VALUE!
17386	17214	Hypothetical			scaffold_360	-	4559	7747													0.04	------	------	NaN	#VALUE!	NaN	#VALUE!	NaN	#VALUE!
123190	123018	Hypothetical			scaffold_295	+	18908	21676													0.028	------	------	NaN	#VALUE!	NaN	#VALUE!	NaN	#VALUE!
16681	16509	Hypothetical			scaffold_235	-	13962	17164													0.024	------	------	NaN	#VALUE!	NaN	#VALUE!	NaN	#VALUE!
20687	20515	Hypothetical			scaffold_259	+	23773	24977													343.861	142.082	90.34	0.0561	3.8063	0.00916	2.42016	0.374	1.57275
18361	18189	Hypothetical	81 aa	Proline rich	scaffold_13	+	252595	253309													146.499	65.168	35.34	0.0267	4.14542	0.00598	2.24802	0.145	1.84403
122676	122504	Hypothetical			scaffold_241	-	30174	31127													245.196	55.276	75.543	0.303	3.24578	0.00585	4.43585	0.78	0.731716
19688	19516	Hypothetical			scaffold_87	-	25993	26271													110.282	51.226	13.145	0.0383	8.38965	0.00866	2.15285	0.0785	3.897
35470	35298	Hypothetical	SS	115 aa	scaffold_54	+	129379	129852													204.882	40.459	43.872	0.0224	4.66999	0.000342	5.06394	0.818	0.922206
19407	19235	Hypothetical			scaffold_64	+	92953	93730													119.96	34.756	70.54	0.521	1.7006	0.00182	3.45149	0.393	0.492713
37503	37331	Hypothetical			scaffold_169	+	44171	45357													100.24	34.103	201.688	0.0656	0.497005	0.00998	2.93933	0.0136	0.169088
114317	114145	Hypothetical	TMHs		scaffold_6	-	46141	47092													91.077	31.786	35.708	0.31	2.5506	0.00866	2.86532	0.906	0.890165
13496	13324	Hypothetical			scaffold_63	-	74601	76065													59.968	29.634	42.974	0.456	1.39545	0.00654	2.02362	0.414	0.68958
15937	15765	Hypothetical	IVS		scaffold_171	+	56129	57104													83.939	28.664	11.476	0.0625	7.31431	0.00423	2.92838	0.244	2.49773
118472	118300	Hypothetical	TMH	84aa	scaffold_64	+	97071	97373													210.687	28.399	83.097	0.118	2.53543	0.000945	7.41882	0.0464	0.341757
34656	34484	Hypothetical			scaffold_30	-	40526	40979													73.901	25.226	51.43	0.161	1.43692	0.00151	2.92956	0.042	0.490492
97775	97603	Hypothetical	TMHs, possibly drug related		scaffold_1	+	529133	531527													54.854	24.184	17.193	0.184	3.19048	0.00903	2.26819	0.664	1.40662
61169	60997	Hypothetical			scaffold_1	-	457409	458664													50.443	21.586	23.499	0.186	2.1466	0.00456	2.33684	0.882	0.918592
113468	113296	Hypothetical	TMH	114 aa	scaffold_1	-	128364	128831													77.211	21.303	54.068	0.373	1.42804	0.00451	3.62442	0.101	0.394004
113927	113755	Hypothetical			scaffold_3	+	147324	148272													61.08	21.175	52.437	0.622	1.16483	0.00876	2.88453	0.0393	0.403818
76809	76637	Hypothetical	TMHs		scaffold_152	+	54164	55393													39.02	18.119	14.274	0.0318	2.73364	0.0094	2.15354	0.452	1.26937
19072	18900	Hypothetical	TMHs		scaffold_41	+	117995	119592													61.391	17.898	40.949	0.668	1.49921	0.00594	3.43005	0.38	0.43708
15926	15754	Hypothetical	TMHs		scaffold_171	+	10582	11914													35.27	17.458	37.765	0.86	0.933934	0.00518	2.02028	0.0909	0.46228
117275	117103	Hypothetical			scaffold_40	+	66259	68367													56.745	17.235	24.025	0.0355	2.36191	0.00192	3.29243	0.259	0.717378
224819	224647	Hypothetical			scaffold_163	+	31000	32623													34.579	16.675	9.531	0.112	3.62806	0.00257	2.0737	0.404	1.74955
131481	131309	Hypothetical	IVS		scaffold_400	+	3227	4030													57.967	16.651	33.059	0.347	1.75344	0.00756	3.48129	0.293	0.503675
116437	116265	Hypothetical		124 aa	scaffold_27	-	203006	203516													61.31	12.376	26.035	0.0203	2.35491	0.00244	4.95394	0.0968	0.47536
73502	73330	Hypothetical			scaffold_91	-	57224	61399													27.521	11.617	55.64	0.0477	0.494626	0.00677	2.36903	0.00724	0.208789
56861	56689	Hypothetical			scaffold_161	+	2079	2795													26.863	11.333	1.805	0.0469	14.8825	0.00918	2.37033	0.0879	6.27867
404841	404669	Hypothetical		110aa	scaffold_52	+	31137	31696													31.103	10.785	19.069	0.798	1.63108	0.00961	2.88391	0.76	0.565578
128279	128107	Hypothetical			scaffold_74	+	118897	119461													53.608	10.252	78.339	0.321	0.684308	0.00135	5.22903	0.00649	0.130867
362898	362726	Hypothetical			scaffold_38	-	15382	16076													21.213	9.849	12.041	0.227	1.76173	0.00759	2.15382	0.658	0.817955
123397	123225	Hypothetical			scaffold_327	+	6724	8015													23.564	9.751	10.42	0.103	2.26142	0.00137	2.41657	0.884	0.935797
110939	110767	Hypothetical	TMHs		scaffold_175	+	19992	21555													13.783	6.803	4.572	0.139	3.01465	0.00559	2.02602	0.533	1.48797
118467	118295	Hypothetical	5' TMH		scaffold_64	-	87852	88541													17.601	6.228	8.465	0.325	2.07927	0.00047	2.82611	0.674	0.735735
116493	116321	Hypothetical			scaffold_28	-	128992	130201													19.255	5.771	13.029	0.244	1.47786	0.00713	3.33651	0.0655	0.442935
97090	96918	Hypothetical			scaffold_336	+	5147	8063													13.944	4.772	14.379	0.962	0.969748	0.00484	2.92205	0.113	0.331873
131170	130998	Hypothetical		149aa	scaffold_281	-	14320	15118													11.644	4.407	1.949	0.00315	5.97435	0.00473	2.64216	0.0499	2.26116
61219	61047	Hypothetical	TMHs		scaffold_1	-	413605	414132													10.864	4.148	10.406	0.95	1.04401	0.00411	2.61909	0.151	0.398616
407696	407524	Hypothetical			scaffold_53	+	127765	129022													13.293	3.536	7.48	0.103	1.77714	0.00705	3.75933	0.112	0.472727
119617	119445	Hypothetical			scaffold_94	+	66214	66773													20.219	3.183	1.576	0.00822	12.8293	0.00289	6.35218	0.203	2.01967
51983	51811	Hypothetical			scaffold_167	+	46943	47125													18.328	2.977	9.1	0.121	2.01407	0.00327	6.15653	0.0821	0.327143
316376	316204	Hypothetical		62aa	scaffold_28	-	47515	47907													11.765	2.951	1.94	0.221	6.06443	0.00124	3.98678	0.764	1.52113
80495	80323	Hypothetical	TMH	117aa	scaffold_320	-	14763	15168													14.724	1.851	6.732	0.134	2.18717	0.00775	7.95462	0.0557	0.274955
36060	35888	Hypothetical	SS		scaffold_78	+	64869	66304													9.83	2.429	0.941	0.211	10.4463	0.00944	4.04693	0.575	2.5813
403680	403508	Hypothetical	TMH	87aa	scaffold_51	-	60602	61026													9.369	2.613	4.634	0.424	2.0218	0.000314	3.58553	0.502	0.563876
117892	117720	Hypothetical			scaffold_52	-	5816	6196													9.303	4.088	2.956	0.056	3.14716	0.00283	2.27568	0.431	1.38295
123352	123180	Hypothetical			scaffold_319	-	17369	18258													7.023	0.711	1.664	0.143	4.22055	0.00368	9.87764	0.38	0.427284
126332	126160	Hypothetical			scaffold_27	+	16271	17153													6.54	1.357	2.799	0.411	2.33655	4.22e-05	4.81945	0.469	0.484816
52987	52815	hypothetical	88aa		scaffold_6	-	254405	254720													6.254	1.638	29.701	0.02	0.210565	0.00763	3.81807	0.000749	0.0551497
133811	133639	Hypothetical			scaffold_1	-	174581	176194													5.979	2.918	2.826	0.0891	2.11571	0.00679	2.04901	0.931	1.03255
145162	144990	Hypothetical			scaffold_101	-	31324	32196													5.455	1.734	2.153	0.0231	2.53367	0.00263	3.14591	0.444	0.805388
11502	11330	hypothetical			scaffold_18	+	115252	116080													5.224	2.447	1.978	0.0187	2.64105	0.00588	2.13486	0.431	1.23711
265906	265734	Hypothetical			scaffold_20	-	67594	68678													4.541	1.958	3.429	0.342	1.32429	0.00253	2.3192	0.0905	0.571012
337573	337401	Hypothetical			scaffold_308	+	6021	6967													4.293	0.894	2.809	0.46	1.5283	0.00974	4.80201	0.141	0.318263
118483	118311	Hypothetical			scaffold_64	+	127704	129529													3.808	0.403	1.92	0.569	1.98333	0.00181	9.44913	0.219	0.209896
114414	114242	Hypothetical	SS		scaffold_7	-	7153	7616													2.926	1.204	0.732	0.12	3.99727	0.00598	2.43023	0.498	1.64481
304823	304651	Hypothetical	SS?		scaffold_252	-	11944	13065													2.848	0.37	1.214	0.418	2.34596	0.000902	7.6973	0.264	0.304778
119957	119785	Hypothetical			scaffold_105	-	50398	50916													2.518	0.364	6.179	NaN	0.407509	0.00155	6.91758	NaN	0.0589092
79586	79414	Hypothetical			scaffold_253	-	19061	20819													2.332	0.862	0.742	0.0692	3.14286	0.00812	2.70534	0.722	1.16173
27087	26915	Hypothetical	TMHs	Possible transporter	scaffold_308	+	9481	12764													1.682	0.648	0.433	0.185	3.88453	0.00361	2.59568	0.663	1.49654
117274	117102	Hypothetical	SS	IVS	scaffold_40	-	61152	62964													1.345	0.139	0.451	0.349	2.98226	0.000455	9.67626	0.405	0.308204
123021	122849	Hypothetical			scaffold_277	-	8564	10729													1.198	0.554	0.439	0.163	2.72893	0.00968	2.16245	0.722	1.26196
202204	202032	Hypothetical		119aa	scaffold_143	+	12395	13024													1.065	0.261	0.662	0.615	1.60876	0.000536	4.08046	0.313	0.39426
113584	113412	Hypothetical			scaffold_1	-	445910	446426													21.017	8.66	31.511	0.202	0.666973	0.0103	2.42691	0.0265	0.274825
358246	358074	Hypothetical			scaffold_36	-	102263	103403													99.884	49.516	64.218	0.101	1.55539	0.0111	2.01721	0.31	0.771061
77797	77625	Hypothetical	TMHs	128aa	scaffold_180	+	1710	2148													10.549	2.342	6.762	0.387	1.56004	0.0121	4.50427	0.131	0.346347
235141	234969	Hypothetical			scaffold_172	-	55506	56169													4.242	1.765	0.669	0.00283	6.34081	0.0126	2.4034	0.0276	2.63827
287175	287003	Hypothetical	SS		scaffold_228	+	22374	23917													7.083	3.352	24.858	0.0203	0.284938	0.0129	2.11307	0.00157	0.134846
118018	117846	Hypothetical	90 aa		scaffold_54	+	126485	126804													86.677	16.15	115.975	0.817	0.747377	0.0134	5.367	0.133	0.139254
273312	273140	Hypothetical	TMHs		scaffold_21	+	92237	93991													41.75	10.952	32.287	0.748	1.29309	0.0139	3.81209	0.153	0.339208
356090	355918	Hypothetical			scaffold_352	+	1681	3048													59.163	24.542	34.043	0.182	1.73789	0.0142	2.41068	0.421	0.720912
287255	287083	Hypothetical			scaffold_228	-	27093	29216													20.476	7.133	4.514	0.0167	4.53611	0.0161	2.8706	0.225	1.58019
125255	125083	Hypothetical			scaffold_11	+	253964	254325													51.75	19.257	11.185	0.194	4.62673	0.0161	2.68733	0.608	1.72168
130324	130152	Hypothetical		possible proteophosphoglycan	scaffold_180	+	2212	4168													20.137	9.949	9.917	0.253	2.03055	0.0179	2.02402	0.996	1.00323
115719	115547	Hypothetical			scaffold_18	-	209326	210541													104.511	44.882	50.732	0.145	2.06006	0.018	2.32857	0.808	0.884688
38155	37983	Hypothetical			scaffold_253	+	5470	6446													96.724	27.21	30.611	0.553	3.15978	0.0181	3.55472	0.954	0.888896
11935	11763	Hypothetical	IVS		scaffold_25	-	168847	170355													36.24	7.975	29.905	0.915	1.21184	0.0187	4.5442	0.434	0.266678
384274	384102	Hypothetical			scaffold_442	+	111	1088													10.212	3.295	18.496	0.378	0.552119	0.0194	3.09924	0.0483	0.178147
113781	113609	Hypothetical			scaffold_2	+	279820	280509													15.343	7.092	12.941	0.721	1.18561	0.0197	2.16342	0.263	0.548026
116491	116319	Hypothetical		poor model	scaffold_28	-	126872	128530													21.437	9.375	11.435	0.14	1.87468	0.021	2.28661	0.606	0.819851
68331	68159	Hypothetical	112 aa		scaffold_33	-	54786	55172													18.653	3.569	8.942	0.248	2.086	0.0211	5.22639	0.267	0.399128
13316	13144	Hypothetical			scaffold_58	-	30296	31160													10.645	4.139	13.328	0.756	0.798694	0.0213	2.57188	0.141	0.310549
80378	80206	Hypothetical		poor model	scaffold_306	+	19449	20325													71.205	31.674	33.922	0.436	2.09908	0.0222	2.24806	0.948	0.93373
119730	119558	Hypothetical			scaffold_98	-	21266	21909													39.284	14.384	26.291	0.423	1.4942	0.0224	2.73109	0.292	0.547107
68532	68360	Hypothetical			scaffold_34	-	143510	144818													0.752	0.226	0.468	0.707	1.60684	0.023	3.32743	0.569	0.482906
76783	76611	Hypothetical		poor model	scaffold_152	-	53301	53630													61.275	22.688	70.121	0.848	0.873847	0.0241	2.70077	0.144	0.323555
50042	49870	Hypothetical			scaffold_472	-	1947	2330													9.274	2.901	3.937	0.362	2.3556	0.028	3.19683	0.748	0.736855
16631	16459	Hypothetical	SS		scaffold_230	-	100	1803													1.702	0.664	0.266	0.00201	6.3985	0.0291	2.56325	0.0612	2.49624
20684	20512	Hypothetical	TMHs		scaffold_259	+	6513	8275													299.353	129.718	27.146	0.0107	11.0275	0.0305	2.30772	0.0205	4.77853
118050	117878	Hypothetical	92 aa		scaffold_55	-	69417	69743													185.387	88.877	153.175	0.418	1.2103	0.0316	2.08588	0.119	0.580232
21315	21143	Hypothetical			scaffold_3	-	339994	341182													1766.65	590.528	630.354	0.559	2.80263	0.032	2.99165	0.972	0.93682
16409	16237	Hypothetical	SS, IVS		scaffold_209	+	35587	37047													22.585	8.072	169.978	0.00366	0.13287	0.0342	2.79794	0.00263	0.0474885
13429	13257	Hypothetical			scaffold_61	-	62771	65633													19.353	7.898	10.614	0.349	1.82335	0.0348	2.45037	0.651	0.744112
25335	25163	Hypothetical		poor model	scaffold_110	+	68222	68890													130.808	47.392	43.696	0.336	2.99359	0.0359	2.76013	0.944	1.08458
310756	310584	Hypothetical			scaffold_267	-	21881	23570													18.264	7.803	10.127	0.196	1.8035	0.0381	2.34064	0.562	0.770514
339651	339479	Hypothetical			scaffold_31	-	130284	130998													20.671	10.023	18.931	0.861	1.09191	0.0383	2.06236	0.225	0.529449
18309	18137	Hypothetical			scaffold_12	-	171685	172083													24.993	9.03	22.84	0.731	1.09426	0.0392	2.76777	0.105	0.395359
357308	357136	Hypothetical	TMHs, IVS	poor model	scaffold_36	-	45938	46648													150.566	71.689	134.02	0.675	1.12346	0.0392	2.10027	0.116	0.534913
127955	127783	Hypothetical	SS	81aa; Proline rich	scaffold_64	-	91565	92264													375.471	61.095	130.701	0.367	2.87275	0.0403	6.14569	0.418	0.467441
123250	123078	Hypothetical			scaffold_303	-	2592	3757													14.473	6.291	3.492	0.157	4.14462	0.0404	2.30059	0.525	1.80155
34484	34312	Hypothetical	TMH		scaffold_26	+	83831	84767													8.258	0.813	9.745	0.912	0.847409	0.044	10.1574	0.141	0.0834274
105093	104921	Hypothetical			scaffold_49	-	51394	52159													11.57	5.416	6.075	0.0877	1.90453	0.0441	2.13626	0.793	0.891523
116699	116527	Hypothetical			scaffold_31	+	119750	120867													12.91	5.252	6.118	0.29	2.11017	0.0444	2.45811	0.85	0.85845
373183	373011	Hypothetical			scaffold_40	+	71733	72621													8.72	2.344	3.943	0.669	2.21151	0.0451	3.72014	0.789	0.594471
40008	39836	Hypothetical			scaffold_8	-	105040	105309													13.512	4.759	11.194	0.724	1.20708	0.0451	2.83925	0.19	0.425138
468378	468206	Hypothetical		132aa	scaffold_86	+	69412	69981													14.829	3.412	4.304	0.172	3.4454	0.0498	4.34613	0.814	0.792751
446049	445877	Hypothetical			scaffold_73	-	67229	68200													13.779	5.704	1.117	0.0236	12.3357	0.0526	2.41567	0.0318	5.10654
356228	356056	Hypothetical			scaffold_352	+	10016	10516													0.636	0.282	2.011	0.0865	0.316261	0.157	2.25532	0.00802	0.140229
16820	16648	Hypothetical		IVSs	scaffold_250	+	5965	9308													8.762	4.384	0.26	0.058	33.7	0.0113	1.99863	0.073	16.8615
379460	379288	Hypothetical	SS,TMH	poor model, possible proteophosphoglycan	scaffold_42	-	157651	160042													48.577	24.323	5.48	0.0162	8.86442	0.00598	1.99716	0.0335	4.4385
512146	511974	Hypothetical			scaffold_6	-	7	1121													0.898	0.45	0.381	0.388	2.35696	0.0711	1.99556	0.865	1.1811
324920	324748	Hypothetical			scaffold_290	-	12637	13495													7.447	3.777	3.709	0.0419	2.00782	0.0036	1.97167	0.945	1.01833
19462	19290	Hypothetical		150aa	scaffold_68	-	111194	111919													96.185	49.31	1.358	0.00504	70.8284	0.19	1.95062	0.0178	36.3108
125705	125533	Hypothetical			scaffold_17	-	162087	162920													142.435	74.097	39.308	0.0219	3.62356	0.0541	1.92228	0.113	1.88504
38465	38293	Hypothetical			scaffold_347	+	6377	8463													92.726	49.603	51.876	0.114	1.78745	0.00453	1.86936	0.897	0.956184
130301	130129	Hypothetical			scaffold_177	+	50849	51801													20.631	11.283	5.328	0.0124	3.87218	0.0411	1.8285	0.0467	2.11768
65489	65317	Hypothetical			scaffold_16	+	154609	155244													118.565	65.367	39.624	0.0693	2.99225	0.0147	1.81384	0.271	1.64968
34464	34292	Hypothetical	TMHs		scaffold_26	-	164	1275													411.553	227.027	77.527	0.0757	5.30851	0.0208	1.81279	0.157	2.92836
279026	278854	Hypothetical	94aa		scaffold_217	-	39601	40062													10.359	5.742	1.428	0.00713	7.2542	0.0399	1.80408	0.0161	4.02101
18340	18168	Hypothetical	TMHs		scaffold_13	+	132660	133384													28.353	15.796	5.508	0.172	5.1476	0.476	1.79495	0.45	2.86783
129908	129736	Hypothetical	TMHs		scaffold_150	-	6993	8031													404.13	227.428	312.784	0.658	1.29204	0.0278	1.77696	0.588	0.727109
59265	59093	Hypothetical	122 aa	poor model	scaffold_265	-	16500	16865													10.001	5.694	1.624	0.0309	6.15825	0.252	1.75641	0.0918	3.50616
348945	348773	Hypothetical			scaffold_332	-	6607	7724													20.58	11.893	3.338	0.0177	6.16537	0.00995	1.73043	0.0373	3.56291
15782	15610	Hypothetical			scaffold_161	+	19767	22331													57.796	33.451	16.923	0.0241	3.41523	0.0149	1.72778	0.0796	1.97666
130467	130295	Hypothetical			scaffold_191	-	33401	34246													216.524	125.807	44.823	0.0499	4.83064	0.0839	1.72108	0.0914	2.80675
38100	37928	Hypothetical			scaffold_244	+	1614	4538													39.132	22.831	9.805	0.0435	3.99102	0.00516	1.71399	0.102	2.32851
299004	298832	Hypothetical			scaffold_245	+	27615	28172													18.911	11.161	3.731	0.0471	5.06861	0.0216	1.69438	0.0919	2.99142
85073	84901	Hypothetical			scaffold_16	+	236769	237778													228.782	135.18	77.328	0.0134	2.95859	0.0393	1.69242	0.0918	1.74814
193586	193414	Hypothetical			scaffold_136	+	54219	55775													18.763	11.142	4.565	0.0317	4.11019	0.0756	1.68399	0.0937	2.44074
477289	477117	Hypothetical			scaffold_90	-	4053	5943													105.932	64.124	31.9	0.0391	3.32075	0.0374	1.65199	0.103	2.01016
78219	78047	Hypothetical			scaffold_194	-	1367	2743													28.653	17.476	8.93	0.0124	3.20862	0.0253	1.63956	0.0588	1.957
36168	35996	Hypothetical			scaffold_84	-	4053	7474													19.628	12.111	6.901	0.0407	2.84423	0.0296	1.62068	0.145	1.75496
80681	80509	Hypothetical	TMHs		scaffold_343	+	2365	3226													153.229	95.034	905.617	0.188	0.169198	0.0118	1.61236	0.107	0.104938
113778	113606	Hypothetical			scaffold_2	+	274567	276606													6.784	4.224	6.42	0.866	1.0567	0.033	1.60606	0.227	0.657944
130713	130541	Hypothetical			scaffold_216	-	9605	12703													57.566	35.855	8.759	0.0455	6.57221	0.0551	1.60552	0.0675	4.0935
155360	155188	Hypothetical			scaffold_109	-	49206	50153													81.35	50.794	15.924	0.0171	5.10864	0.0678	1.60157	0.0358	3.18978
113588	113416	Hypothetical			scaffold_1	+	456041	456974													146.173	91.395	106.693	0.44	1.37003	0.0177	1.59935	0.707	0.856617
287714	287542	Hypothetical	TMHs		scaffold_23	-	1	1180													3.506	2.195	6.274	0.36	0.558814	0.252	1.59727	0.182	0.349857
107440	107268	Hypothetical			scaffold_86	+	70451	71227													109.989	69.078	15.134	0.0038	7.26768	0.0345	1.59224	0.0131	4.56442
39443	39271	Hypothetical		small model	scaffold_238	-	3093	3344													111.875	70.29	75.328	0.471	1.48517	0.147	1.59162	0.92	0.933119
109824	109652	Hypothetical			scaffold_139	+	53987	55536													22.551	14.179	7.159	0.0206	3.15002	0.0377	1.59045	0.0529	1.98058
18896	18724	Hypothetical		78aa	scaffold_33	+	48433	49268													75.755	47.814	21.148	0.00626	3.58214	0.0182	1.58437	0.027	2.26092
303996	303824	Hypothetical			scaffold_250	+	13137	14119													11.797	7.478	3.131	0.117	3.76781	0.196	1.57756	0.252	2.38837
131547	131375	Hypothetical	SS or 5'TMH		scaffold_523	+	362	1605													237.788	150.741	1986.96	0.0196	0.119674	0.114	1.57746	0.00983	0.0758652
125026	124854	Hypothetical			scaffold_9	+	195747	196668													29.547	18.842	2.159	0.0491	13.6855	0.0859	1.56815	0.0563	8.72719
219359	219187	Hypothetical			scaffold_16	-	49599	51261													29.11	18.611	5.019	0.0251	5.79996	0.0354	1.56413	0.043	3.70811
20651	20479	Hypothetical			scaffold_244	+	5935	6504													72.243	46.493	64.174	0.667	1.12574	0.363	1.55385	0.585	0.724483
107883	107711	Hypothetical			scaffold_95	+	82981	84291													105.76	68.402	46.623	0.245	2.26841	0.128	1.54615	0.523	1.46713
33008	32836	Hypothetical	TMHs		scaffold_2	-	367110	368541													364.339	237.8	24.297	0.0327	14.9952	0.372	1.53212	0.0529	9.78722
121766	121594	Hypothetical	TMHs, 95 aa		scaffold_179	+	53486	53878													13.978	9.283	3.75	0.0334	3.72747	0.223	1.50576	0.0987	2.47547
129345	129173	Hypothetical	SS	74aa	scaffold_120	-	23521	24068													3600.93	2397.64	453.316	0.0228	7.94353	0.236	1.50187	0.0387	5.2891
18272	18100	Hypothetical	TMH	82aa	scaffold_11	-	292826	293615													18.079	12.044	70.287	0.0275	0.257217	0.114	1.50108	0.00407	0.171355
308645	308473	Hypothetical	IVS		scaffold_26	+	156804	159786													43.535	29.009	12.178	0.0296	3.57489	0.168	1.50074	0.044	2.38208
19757	19585	Hypothetical	SS	228 aa	scaffold_95	+	19966	21449													1086.89	725.484	1069.99	0.961	1.0158	0.0416	1.49816	0.217	0.678029
77538	77366	Hypothetical			scaffold_172	+	5996	6521													10.259	6.908	13.178	0.359	0.778494	0.34	1.48509	0.246	0.524207
125529	125357	Hypothetical			scaffold_15	+	53563	58486													45.102	30.384	8.637	0.0117	5.22195	0.0872	1.4844	0.0228	3.51789
126607	126435	Hypothetical			scaffold_31	+	124739	125472													17.946	12.141	5.137	0.0141	3.49348	0.157	1.47813	0.0478	2.36344
362971	362799	Hypothetical			scaffold_38	+	24230	24746													19.847	13.51	8.035	0.166	2.47007	0.101	1.46906	0.38	1.68139
32884	32712	Hypothetical			scaffold_1	-	479143	479814													152.067	103.764	157.821	0.932	0.963541	0.0451	1.46551	0.311	0.657479
463647	463475	Hypothetical			scaffold_83	+	49809	50967													22.839	15.595	7.891	0.0183	2.89431	0.0493	1.46451	0.0395	1.9763
128229	128057	Hypothetical	TMH		scaffold_73	+	38394	39344													26.12	17.849	65.377	0.0375	0.399529	0.0545	1.46339	0.0097	0.273017
124860	124688	Hypothetical	SS/TMH		scaffold_8	+	16200	17692													405.639	278.041	386.87	0.875	1.04852	0.0316	1.45892	0.274	0.718694
75699	75527	Hypothetical			scaffold_129	+	25115	25654													64.568	44.312	57.219	0.641	1.12844	0.0515	1.45712	0.345	0.774428
124246	124074	Hypothetical	TMHs		scaffold_2	-	329172	331275													21.992	15.181	4.913	0.0306	4.47629	0.104	1.44865	0.041	3.08997
292141	291969	Hypothetical			scaffold_234	-	1871	2848													254.474	177.011	23.376	0.0307	10.8861	0.0572	1.43762	0.0368	7.57234
34090	33918	Hypothetical			scaffold_18	-	123942	126289													21.603	15.143	7.415	0.0155	2.91342	0.119	1.4266	0.0562	2.04221
29320	29148	Hypothetical	TMHs		scaffold_32	+	34515	36043													195.928	138.096	70.672	0.0124	2.77236	0.326	1.41878	0.163	1.95404
113477	113305	Hypothetical			scaffold_1	+	155494	157966													31.462	22.502	3.58	0.0058	8.78827	0.0378	1.39819	0.0106	6.28547
20250	20078	Hypothetical			scaffold_150	-	33669	34504													106.637	77.207	32.764	0.0409	3.2547	0.183	1.38118	0.0663	2.35646
18136	17964	Hypothetical	SS/TMH		scaffold_9	-	30323	31521													1934.91	1402.5	3739	0.136	0.517494	0.128	1.37961	0.0465	0.375101
297611	297439	Hypothetical			scaffold_241	-	15581	17667													12.271	8.909	4.291	0.0206	2.85971	0.0984	1.37737	0.0564	2.07621
18181	18009	Hypothetical			scaffold_9	+	257749	258668													209.739	153.641	28.593	0.0165	7.33533	0.682	1.36512	0.0805	5.37338
128507	128335	Hypothetical			scaffold_83	+	61404	62261													6.593	4.84	20.171	0.0292	0.326855	0.187	1.36219	0.00317	0.239948
115158	114986	Hypothetical	TMHs		scaffold_12	-	288102	290092													222.139	163.38	39.745	0.0464	5.58911	0.34	1.35965	0.0617	4.11071
23840	23668	Hypothetical			scaffold_47	-	7851	9657													38.1	28.15	35.474	0.745	1.07403	0.121	1.35346	0.348	0.793539
34912	34740	Hypothetical	TMHs		scaffold_36	-	16424	18510													187.108	140.87	382.82	0.0361	0.488762	0.0823	1.32823	0.015	0.36798
76385	76213	Hypothetical			scaffold_143	-	68633	69824													44.224	33.561	20.43	0.0699	2.16466	0.135	1.31772	0.17	1.64273
116108	115936	Hypothetical			scaffold_23	+	160783	163693													29.136	22.263	10.441	0.0195	2.79054	0.147	1.30872	0.0423	2.13227
115874	115702	Hypothetical			scaffold_21	+	401	1953													79.509	60.85	22.05	0.0282	3.60585	0.0945	1.30664	0.0391	2.75964
36959	36787	Hypothetical			scaffold_128	+	20886	22294													17.751	13.657	8.955	0.32	1.98224	0.265	1.29977	0.527	1.52507
501192	501020	Hypothetical	TMHs		scaffold_226	-	15335	17614													2.637	2.056	1.195	0.0412	2.20669	0.386	1.28259	0.172	1.7205
30455	30283	Hypothetical			scaffold_71	-	21825	24148													84.088	65.628	10.282	0.00504	8.17818	0.748	1.28128	0.0776	6.3828
374864	374692	Hypothetical			scaffold_408	+	5589	7454													15.18	11.983	5.436	0.0143	2.79249	0.151	1.26679	0.0349	2.20438
189804	189632	Hypothetical			scaffold_132	-	43694	45270													24.296	19.281	21.392	0.702	1.13575	0.0965	1.2601	0.764	0.901318
16172	16000	Hypothetical			scaffold_189	+	24997	26621													1.656	1.319	1.307	0.802	1.26702	0.871	1.2555	0.996	1.00918
10547	10375	Hypothetical			scaffold_6	-	66121	67320													42.272	33.71	40.843	0.904	1.03499	0.161	1.25399	0.487	0.825356
19192	19020	Hypothetical	TMHs		scaffold_47	+	140335	141685													114.175	91.528	19.082	0.0411	5.98339	0.119	1.24743	0.0441	4.79656
32953	32781	Hypothetical			scaffold_2	+	120223	121594													38.334	30.735	24.09	0.163	1.59128	0.198	1.24724	0.404	1.27584
61146	60974	Hypothetical			scaffold_1	+	60201	60814													21.46	17.213	3.963	0.0489	5.41509	0.565	1.24673	0.0329	4.34343
31720	31548	Hypothetical			scaffold_152	+	41636	42480													72.446	58.251	84.777	0.453	0.854548	0.12	1.24369	0.128	0.687109
37596	37424	Hypothetical			scaffold_178	+	22568	23721													14.477	11.721	3.035	0.0333	4.77002	0.349	1.23513	0.0369	3.86194
19569	19397	Hypothetical		very small model	scaffold_76	+	56808	57563													12.413	10.056	19.683	0.122	0.630646	0.329	1.23439	0.0775	0.510898
122182	122010	Hypothetical	TMHs		scaffold_206	+	1245	2571													12.549	10.211	3.021	0.041	4.15392	0.132	1.22897	0.0468	3.38001
144338	144166	Hypothetical	TMHs	poor model	scaffold_100	+	64170	65428													22.252	18.134	6.706	0.0311	3.31822	0.417	1.22709	0.0136	2.70415
20008	19836	Hypothetical	SS	96aa	scaffold_120	+	25242	25749													299.296	244.627	19.46	0.0526	15.3801	0.738	1.22348	0.0671	12.5708
27813	27641	Hypothetical		83aa	scaffold_5	+	272292	272745													153.527	126.257	5.484	0.071	27.9954	0.549	1.21599	0.0701	23.0228
34049	33877	Hypothetical	TMH		scaffold_17	-	190749	192344													32.508	27.081	7.547	0.0441	4.30741	0.614	1.2004	0.0659	3.58831
36201	36029	Hypothetical			scaffold_85	-	52350	53109													14.607	12.232	15.412	0.901	0.947768	0.358	1.19416	0.571	0.793667
18574	18402	Hypothetical	SS	Possible phosphodiesterase	scaffold_21	-	108487	110191													412.684	346.011	124.847	0.0369	3.30552	0.574	1.19269	0.0752	2.77148
283833	283661	Hypothetical	103 aa		scaffold_221	+	18853	19462													22.744	19.117	3.979	0.0493	5.71601	0.438	1.18973	0.0488	4.80447
124878	124706	Hypothetical	TMHs		scaffold_8	-	97461	99196													26.05	22.025	4.706	0.0368	5.53549	0.38	1.18275	0.0352	4.6802
19081	18909	Hypothetical			scaffold_42	+	59752	61355													91.002	77.097	29.576	0.0479	3.07689	0.421	1.18036	0.0447	2.60674
35329	35157	Hypothetical			scaffold_49	-	22383	23630													19.447	16.526	21.066	0.863	0.923146	0.491	1.17675	0.531	0.784487
128205	128033	Hypothetical			scaffold_72	+	68729	73268													47.882	40.966	8.836	0.017	5.41897	0.356	1.16882	0.021	4.63626
131465	131293	Hypothetical	SS,TMHs		scaffold_380	+	520	1855													66.8	57.226	9.181	0.0174	7.2759	0.675	1.1673	0.0147	6.23309
35506	35334	Hypothetical	SS		scaffold_56	-	12592	13803													445.333	381.584	746.383	0.129	0.596655	0.236	1.16706	0.0725	0.511244
23639	23467	Hypothetical			scaffold_41	+	48382	50751													19.128	16.4	6.982	0.029	2.73962	0.497	1.16634	0.0324	2.3489
35895	35723	Hypothetical	TMH	poor model	scaffold_71	-	18019	18966													39.87	34.268	13.837	0.0461	2.8814	0.657	1.16348	0.112	2.47655
105105	104933	Hypothetical			scaffold_49	+	62037	63045													529.839	456.98	31.451	0.03	16.8465	0.666	1.15944	0.0312	14.5299
30020	29848	Hypothetical			scaffold_52	+	120390	122014													18.19	15.731	4.487	0.0484	4.05393	0.301	1.15632	0.0491	3.50591
104736	104564	Hypothetical			scaffold_45	-	149668	150536													22.434	19.417	7.928	0.016	2.82972	0.459	1.15538	0.0324	2.44917
258838	258666	Hypothetical			scaffold_2	-	93084	94902													13.179	11.466	3.17	0.0252	4.15741	0.724	1.1494	0.0649	3.61703
129729	129557	Hypothetical			scaffold_140	-	17901	19005													3.116	2.711	17.9	0.00717	0.174078	0.693	1.14939	0.00986	0.151453
37989	37817	Hypothetical			scaffold_226	-	3121	6229													64.519	56.181	15.686	0.0233	4.11316	0.451	1.14841	0.0323	3.5816
276410	276238	Hypothetical			scaffold_213	+	4459	6797													32.337	28.168	7.967	0.113	4.05887	0.473	1.148	0.12	3.53558
79229	79057	Hypothetical			scaffold_234	-	29132	30328													69.124	61.152	37.117	0.0439	1.86233	0.336	1.13036	0.0668	1.64755
373908	373736	Hypothetical			scaffold_40	-	135280	136100													36.684	32.482	4.495	0.0384	8.16107	0.508	1.12936	0.0359	7.22625
484399	484227	Hypothetical			scaffold_96	+	8406	9684													36.889	32.701	11.538	0.0368	3.19717	0.554	1.12807	0.0509	2.8342
20105	19933	Hypothetical			scaffold_132	+	2932	4988													517.416	459.461	28.573	0.0708	18.1086	0.464	1.12614	0.0626	16.0803
27964	27792	Hypothetical	TMHs		scaffold_8	-	10043	11392													350.016	312.397	80.908	0.0471	4.3261	0.738	1.12042	0.0618	3.86114
272802	272630	Hypothetical	TMHs		scaffold_21	+	41959	44590													15.004	13.42	1.841	0.00135	8.14992	0.736	1.11803	0.00882	7.28952
379311	379139	Hypothetical			scaffold_42	+	135484	137616													13.433	12.142	3.549	0.0277	3.78501	0.517	1.10633	0.0318	3.42125
34905	34733	Hypothetical			scaffold_35	+	167078	169298													73.648	66.859	26.832	0.0316	2.74478	0.549	1.10154	0.0363	2.49176
366141	365969	Hypothetical			scaffold_39	+	98695	99345													12.431	11.366	3.791	0.0243	3.27908	0.574	1.0937	0.0292	2.99815
278613	278441	Hypothetical		poor model	scaffold_217	+	22217	24539													34.675	31.889	7.564	0.0144	4.58421	0.747	1.08737	0.0148	4.21589
127201	127029	Hypothetical			scaffold_43	-	93672	95151													103.659	95.398	21.993	0.0457	4.71327	0.585	1.0866	0.0441	4.33765
36631	36459	Hypothetical	SS		scaffold_107	+	90330	91908													13.173	12.126	1230.72	0.000379	0.0107035	0.762	1.08634	0.000548	0.00985274
19943	19771	Hypothetical		very small model	scaffold_112	+	84493	84904													60.853	56.18	63.856	0.926	0.952972	0.827	1.08318	0.795	0.879792
55922	55750	Hypothetical	86aa		scaffold_42	-	53368	53678													55.777	51.671	14.348	0.0249	3.88744	0.632	1.07946	0.0262	3.60127
108508	108336	Hypothetical			scaffold_108	-	16725	18144													29.803	27.615	7.325	0.0141	4.06867	0.736	1.07923	0.00726	3.76997
38701	38529	Hypothetical	78aa		scaffold_154	-	26390	26620													12.98	12.037	4.515	0.141	2.87486	0.876	1.07834	0.111	2.666
126720	126548	Hypothetical			scaffold_33	+	55403	56353													16.953	15.918	7.966	0.0986	2.12817	0.667	1.06502	0.105	1.99824
45651	45479	Hypothetical			scaffold_1	-	74522	75052													26.649	25.257	23.174	0.519	1.14995	0.735	1.05511	0.725	1.08989
87022	86850	Hypothetical			scaffold_30	-	183765	184964													42.442	40.255	15.022	0.0496	2.82532	0.747	1.05433	0.0461	2.67974
117471	117299	Hypothetical		very small model	scaffold_43	+	158819	159259													0.333	0.316	0.808	NaN	0.412129	NaN	1.0538	NaN	0.391089
36465	36293	Hypothetical	TMHs, SS		scaffold_98	-	73793	75010													370.886	352.436	45.939	0.00114	8.07345	0.885	1.05235	0.0115	7.67183
187212	187040	Hypothetical	TMH		scaffold_13	+	274159	276139													42.718	40.633	15.17	0.0295	2.81595	0.716	1.05131	0.0311	2.67851
64922	64750	Hypothetical			scaffold_13	+	54103	54545													26.694	25.491	2.62	0.0103	10.1885	0.935	1.04719	0.0122	9.72939
18319	18147	Hypothetical			scaffold_12	-	232623	233914													92.696	88.791	51.186	0.0642	1.81096	0.826	1.04398	0.0895	1.73467
10257	10085	Hypothetical			scaffold_3	-	99499	100254													15.196	14.647	44.592	0.229	0.340779	0.919	1.03748	0.188	0.328467
33065	32893	Hypothetical			scaffold_3	-	93443	95796													32.145	31.026	26.225	0.593	1.22574	0.799	1.03607	0.665	1.18307
32447	32275	Hypothetical		79aa	scaffold_254	-	15389	15879													268.223	259.352	24.562	0.0337	10.9202	0.906	1.0342	0.0319	10.5591
25528	25356	Hypothetical			scaffold_122	-	43939	45265													63.235	61.178	9.041	0.000924	6.99425	0.932	1.03362	0.0154	6.76673
252313	252141	Hypothetical	TMHs		scaffold_190	-	34344	35854													42.269	41.017	20.622	0.103	2.0497	0.84	1.03052	0.096	1.98899
129326	129154	Hypothetical			scaffold_119	-	35609	36308													57.973	56.314	11.798	0.0422	4.9138	0.883	1.02946	0.0346	4.77318
18902	18730	Hypothetical		81aa, poor model	scaffold_33	-	97013	97475													43.732	42.727	15.842	0.014	2.76051	0.899	1.02352	0.0235	2.69707
94223	94051	Hypothetical	TMHs		scaffold_153	-	386	3885													22.665	22.23	8.256	0.0435	2.74528	0.922	1.01957	0.041	2.69259
131453	131281	Hypothetical			scaffold_367	-	83	1277													17.381	17.125	6.332	0.0337	2.74495	0.956	1.01495	0.025	2.70452
11646	11474	Hypothetical			scaffold_20	+	211113	211898													23.38	23.042	22.409	0.898	1.04333	0.951	1.01467	0.944	1.02825
116231	116059	Hypothetical	TMHs, IVS		scaffold_25	+	43275	45519													136.754	134.885	46.6	0.0128	2.93464	0.941	1.01386	0.0179	2.89453
114515	114343	Hypothetical	TMHs		scaffold_7	+	285206	286628													21.723	21.649	7.651	0.0131	2.83924	0.988	1.00342	0.0191	2.82956
38348	38176	Hypothetical	TMHs		scaffold_300	-	15579	17097													103.179	103.223	5.659	0.00449	18.2327	1	0.999574	0.0082	18.2405
131040	130868	Hypothetical			scaffold_257	-	11997	12941													32.61	32.66	117.86	0.00736	0.276684	0.997	0.998469	0.0299	0.277108
184702	184530	Hypothetical			scaffold_13	+	78994	80738													25.277	25.475	4.877	0.0215	5.1829	0.977	0.992228	0.0173	5.2235
113543	113371	Hypothetical			scaffold_1	+	322847	323827													10.623	10.774	2.693	0.0405	3.94467	0.951	0.985985	0.0273	4.00074
491415	491243	Hypothetical			scaffold_114	+	59169	61156													10.557	10.712	286.721	0.000672	0.0368198	0.941	0.98553	0.000902	0.0373604
19112	18940	Hypothetical			scaffold_43	+	127237	129327													72.53	73.907	36.944	0.0538	1.96324	0.878	0.981368	0.047	2.00051
20363	20191	Hypothetical	TMHs		scaffold_170	-	6019	7119													67.046	68.441	57.111	0.803	1.17396	0.881	0.979617	0.777	1.19839
34242	34070	Hypothetical			scaffold_21	+	147432	149064													16.911	17.426	5.648	0.0321	2.99416	0.877	0.970446	0.0276	3.08534
209015	208843	Hypothetical			scaffold_15	-	76971	78617													25.778	26.567	8.672	0.0463	2.97256	0.888	0.970302	0.0378	3.06354
29483	29311	Hypothetical			scaffold_35	+	130220	131458													16.875	17.394	47.178	0.0375	0.357688	0.938	0.970162	0.0469	0.368689
48694	48522	Hypothetical			scaffold_163	-	40098	40526													2.296	2.37	1.789	0.72	1.2834	0.948	0.968776	0.725	1.32476
471216	471044	Hypothetical			scaffold_88	+	102510	104241													19.526	20.166	6.336	0.0333	3.08176	0.872	0.968263	0.0343	3.18277
351042	350870	Hypothetical	SS,TMH		scaffold_34	-	76256	78126													28.53	29.584	3.235	0.0484	8.81917	0.886	0.964373	0.0385	9.14498
414362	414190	Hypothetical			scaffold_58	+	32119	33303													2.259	2.345	8.198	0.00506	0.275555	0.846	0.963326	0.0136	0.286045
114018	113846	Hypothetical			scaffold_3	+	377302	381167													0.045	0.047	------	NaN	#VALUE!	NaN	0.957447	NaN	#VALUE!
80406	80234	Hypothetical		IVS, 116aa	scaffold_307	-	3422	4080													404.239	422.457	35.046	0.0397	11.5345	0.941	0.956876	0.0395	12.0544
329362	329190	Hypothetical			scaffold_3	+	183450	184555													40.068	41.901	9.971	0.0241	4.01845	0.823	0.956254	0.0187	4.20229
28554	28382	Hypothetical			scaffold_16	-	45687	46586													181.269	189.718	77.96	0.0388	2.32515	0.759	0.955465	0.0342	2.43353
411974	411802	Hypothetical			scaffold_56	+	92351	94086													22.264	23.366	3.015	0.0469	7.38441	0.7	0.952837	0.0362	7.74992
24369	24197	Hypothetical			scaffold_66	-	25285	25512													17.595	18.519	5.182	0.0242	3.39541	0.772	0.950105	0.025	3.57372
124043	123871	Hypothetical	TMHs		scaffold_1	+	391718	392521													131.028	138.008	11.944	0.03	10.9702	0.86	0.949423	0.0279	11.5546
18613	18441	Hypothetical	SS		scaffold_22	-	187234	188336													111.856	117.888	165.609	0.181	0.675422	0.73	0.948833	0.234	0.711845
68072	67900	Hypothetical			scaffold_31	+	7852	8693													17.177	18.104	9.973	0.0725	1.72235	0.712	0.948796	0.063	1.8153
108505	108333	Hypothetical	TMHs		scaffold_108	-	14453	16075													282.484	297.821	112.417	0.0449	2.51282	0.735	0.948503	0.0328	2.64925
62499	62327	Hypothetical	TMHs		scaffold_3	+	204423	205407													79.062	83.957	63.258	0.403	1.24983	0.663	0.941696	0.31	1.32722
266317	266145	Hypothetical			scaffold_20	-	117219	119727													23.137	24.573	7.207	0.0235	3.21035	0.627	0.941562	0.0199	3.4096
36235	36063	Hypothetical			scaffold_87	-	24187	25527													103.315	109.744	6.129	0.0533	16.8567	0.893	0.941418	0.044	17.9057
20016	19844	Hypothetical		129aa	scaffold_120	-	54099	54888													255.675	272.34	13.408	0.104	19.0688	0.934	0.938808	0.0943	20.3118
447253	447081	Hypothetical			scaffold_74	-	55104	55844													0.755	0.806	1.563	0.365	0.483045	0.931	0.936725	0.514	0.515675
325957	325785	Hypothetical			scaffold_294	+	2280	2960													10.858	11.636	3.052	0.0302	3.55767	0.782	0.933139	0.0273	3.81258
233628	233456	Hypothetical			scaffold_170	+	46389	47390													93.278	100.214	1469.88	0.00297	0.0634594	0.742	0.930788	0.00217	0.0681781
38528	38356	Hypothetical			scaffold_411	+	217	1742													22.53	24.262	7.804	0.0277	2.88698	0.71	0.928613	0.0246	3.10892
481631	481459	Hypothetical			scaffold_93	-	79835	82509													16.35	17.641	4.869	0.039	3.35798	0.595	0.926818	0.0304	3.62313
505284	505112	Hypothetical	IVS		scaffold_303	+	196	1523													11.267	12.179	2.415	0.0439	4.66542	0.659	0.925117	0.0323	5.04306
129635	129463	Hypothetical	TMHs		scaffold_135	+	6721	7797													5.133	5.562	5.336	0.947	0.961957	0.641	0.922869	0.942	1.04235
81247	81075	Hypothetical		very small model	scaffold_1	-	73332	73822													35.085	38.164	30.778	0.509	1.13994	0.462	0.919322	0.32	1.23998
271689	271517	Hypothetical	SS		scaffold_208	+	38543	40031													12.235	13.351	1663.05	0.000245	0.00735697	0.76	0.916411	0.000565	0.00802803
15594	15422	Hypothetical			scaffold_150	+	3929	6813													36.716	40.191	1.533	0.00338	23.9504	0.695	0.913538	0.00196	26.2172
128000	127828	Hypothetical			scaffold_66	-	49756	50993													45.059	49.427	14.391	0.00893	3.13105	0.42	0.911627	0.00738	3.43458
71912	71740	Hypothetical			scaffold_68	+	106720	107478													141.338	155.129	74.218	0.226	1.90436	0.648	0.9111	0.145	2.09018
425212	425040	Hypothetical			scaffold_63	-	16131	17057													2.557	2.809	0.391	0.00245	6.53964	0.716	0.910288	0.00679	7.18414
249944	249772	Hypothetical			scaffold_19	+	97327	98102													161.726	178.781	51.075	0.0128	3.16644	0.495	0.904604	0.00954	3.50036
226407	226235	Hypothetical			scaffold_165	+	35729	37624													106.161	117.363	17.614	0.0207	6.02708	0.391	0.904553	0.0153	6.66305
408055	407883	Hypothetical	SS		scaffold_54	+	29026	30141													2.498	2.773	62.832	0.000556	0.0397568	0.735	0.900829	0.00395	0.0441336
98611	98439	Hypothetical			scaffold_4	+	59008	60086													1121.41	1249.33	372.763	0.042	3.00836	0.636	0.897607	0.0287	3.35154
397747	397575	Hypothetical			scaffold_5	-	147033	148561													51.205	57.462	3.158	0.0139	16.2144	0.457	0.891111	0.0108	18.1957
207181	207009	Hypothetical	SS		scaffold_148	+	60709	61199													9.922	11.152	26.858	0.115	0.369424	0.854	0.889706	0.147	0.415221
210357	210185	Hypothetical			scaffold_15	-	207018	208702													17.306	19.492	5.774	0.048	2.99723	0.404	0.887851	0.0316	3.37582
238364	238192	Hypothetical			scaffold_178	+	20235	21763													12.399	14.004	2.719	0.0469	4.56013	0.528	0.88539	0.031	5.15042
125696	125524	Hypothetical			scaffold_17	-	126166	127892													21.802	24.66	16.715	0.435	1.30434	0.628	0.884104	0.303	1.47532
21837	21665	Hypothetical			scaffold_9	+	249494	250167													33.377	37.855	18.65	0.0765	1.78965	0.371	0.881707	0.0484	2.02976
34826	34654	Hypothetical		Sinlge homolog in Phacr	scaffold_33	+	188799	189557													81.974	92.98	12.724	0.0369	6.44247	0.344	0.88163	0.0267	7.30745
130698	130526	Hypothetical	SS		scaffold_214	+	39839	40913													65.307	74.139	2.301	0.000876	28.382	0.713	0.880872	0.000655	32.2203
130400	130228	Hypothetical	SS/TMH		scaffold_186	+	2436	3319													182.091	207.341	358.727	0.0867	0.507603	0.606	0.87822	0.0978	0.577991
124722	124550	Hypothetical			scaffold_6	-	265515	267175													61.19	69.775	17.584	0.0394	3.47987	0.339	0.876962	0.0276	3.9681
53166	52994	Hypothetical			scaffold_296	+	8012	8594													6.301	7.196	2.897	0.0984	2.17501	0.742	0.875625	0.057	2.48395
66156	65984	Hypothetical			scaffold_19	-	109244	109979													26.943	30.777	8.604	0.016	3.13145	0.354	0.875426	0.0123	3.57706
124113	123941	Hypothetical	SS/TMH		scaffold_1	+	583440	584807													37.995	43.494	2534.52	1.38e-05	0.014991	0.679	0.873569	0.000492	0.0171607
123735	123563	Hypothetical			scaffold_427	+	4448	4960													13.25	15.283	4.328	0.0226	3.06146	0.477	0.866976	0.00626	3.53119
125849	125677	Hypothetical			scaffold_19	+	207579	208396													5632.48	6521.3	3482.3	0.271	1.61746	0.483	0.863705	0.16	1.8727
65703	65531	Hypothetical			scaffold_17	-	38003	39300													307.418	356.293	304.956	0.978	1.00807	0.241	0.862824	0.587	1.16834
388770	388598	Hypothetical		93aa	scaffold_47	-	13159	13790													18.762	21.786	5.104	0.0228	3.67594	0.549	0.861195	0.00776	4.26842
69350	69178	Hypothetical			scaffold_41	-	21959	23143													9.131	10.632	3.096	0.0212	2.94929	0.422	0.858822	0.00849	3.43411
129395	129223	Hypothetical			scaffold_122	-	63155	64274													37.229	43.538	26.562	0.224	1.40159	0.468	0.855092	0.137	1.63911
94717	94545	Hypothetical	TMHs		scaffold_170	-	40402	41513													216.981	254.4	14.407	0.032	15.0608	0.641	0.852913	0.0267	17.6581
168022	167850	Hypothetical			scaffold_116	-	63069	64653													64.744	76.261	32.761	0.156	1.97625	0.341	0.848979	0.0867	2.3278
362232	362060	Hypothetical			scaffold_371	-	651	2151													31.956	37.711	10.543	0.0439	3.03102	0.334	0.847392	0.0288	3.57688
19628	19456	Hypothetical			scaffold_82	-	104267	104663													22.052	26.267	7.881	0.0437	2.79812	0.384	0.839532	0.034	3.33295
272373	272201	Hypothetical			scaffold_209	+	40001	40488													37.761	45.004	9.847	0.0455	3.83477	0.688	0.839059	0.0471	4.57033
99900	99728	Hypothetical	SS		scaffold_9	+	255209	256271													47.116	56.448	102.659	0.292	0.458956	0.44	0.83468	0.398	0.549859
404485	404313	Hypothetical			scaffold_51	-	133929	134687													16.361	19.72	5.665	0.0211	2.88808	0.358	0.829665	0.00943	3.48102
149593	149421	Hypothetical	TMHs		scaffold_105	-	7620	8829													34.032	41.276	38.296	0.672	0.888657	0.409	0.824498	0.773	1.07781
110583	110411	Hypothetical	TMHs		scaffold_163	-	41453	43950													69.362	84.175	22.689	0.0293	3.05708	0.124	0.824021	0.0176	3.70995
25049	24877	Hypothetical			scaffold_95	-	47725	48942													60.563	73.524	21.703	0.0105	2.79054	0.129	0.823717	0.00618	3.38773
339474	339302	Hypothetical	ss, 106 aa		scaffold_31	+	104969	105652													31.544	38.423	18.652	0.304	1.69119	0.453	0.820967	0.201	2.05999
186474	186302	Hypothetical			scaffold_13	-	223628	225077													426.255	520.597	770.827	0.0704	0.552984	0.227	0.818781	0.125	0.675375
131262	131090	Hypothetical			scaffold_296	-	9882	11198													29.335	35.93	7.26	0.0272	4.04063	0.284	0.816449	0.0168	4.94904
21680	21508	Hypothetical			scaffold_8	+	27849	29806													32.31	39.588	12.272	0.0153	2.63282	0.135	0.816156	0.00813	3.22588
456807	456635	Hypothetical			scaffold_8	-	166720	168433													22.953	28.157	6.583	0.0316	3.48671	0.173	0.815179	0.0196	4.27723
128813	128641	Hypothetical	SS,TMHs		scaffold_95	+	89211	90200													30.109	37.191	1.762	0.0136	17.088	0.565	0.809578	0.00814	21.1073
20313	20141	Hypothetical			scaffold_160	+	59426	60182													139.323	172.562	121.495	0.753	1.14674	0.364	0.807379	0.476	1.42032
111417	111245	Hypothetical			scaffold_195	-	29968	31485													71.648	88.788	14.269	0.0148	5.02123	0.313	0.806956	0.0128	6.22244
366453	366281	Hypothetical			scaffold_39	-	123506	124338													34.614	43.127	7.192	0.0309	4.81285	0.281	0.802606	0.0218	5.99652
477290	477118	Hypothetical			scaffold_90	-	3319	4052													129.699	162.214	33.234	0.0218	3.9026	0.291	0.799555	0.0199	4.88097
286585	286413	Hypothetical		76aa	scaffold_227	-	22385	22784													39.117	48.947	9.885	0.014	3.95721	0.195	0.799171	0.00725	4.95164
323259	323087	Hypothetical			scaffold_29	-	78469	79292													6.216	7.811	7.568	0.6	0.821353	0.167	0.795801	0.941	1.03211
128386	128214	Hypothetical			scaffold_78	-	108340	109576													70.886	89.224	102.93	0.142	0.688682	0.233	0.794472	0.569	0.866842
267184	267012	Hypothetical	SS/TMHs		scaffold_20	-	197754	198735													17.786	22.39	25.225	0.259	0.705094	0.21	0.794372	0.662	0.887611
17585	17413	Hypothetical	TMHs		scaffold_465	-	243	1818													1.647	2.077	0.628	0.0741	2.62261	0.47	0.792971	0.00831	3.30732
307226	307054	Hypothetical			scaffold_26	-	18379	20649													3.981	5.026	1.416	0.0164	2.81144	0.179	0.792081	0.00719	3.54944
12237	12065	Hypothetical			scaffold_31	+	83071	84614													19.219	24.403	6.763	0.0167	2.84179	0.221	0.787567	0.00917	3.60831
97532	97360	Hypothetical	TMHs		scaffold_1	+	208752	210861													84.641	107.908	19.251	0.0187	4.39671	0.0987	0.784381	0.0106	5.60532
127686	127514	Hypothetical			scaffold_56	+	36392	39033													49.48	63.469	10.603	0.028	4.6666	0.126	0.779593	0.0167	5.98595
114067	113895	Hypothetical			scaffold_4	+	69802	70723													17.899	23.137	14.997	0.509	1.19351	0.22	0.773609	0.211	1.54278
36532	36360	Hypothetical	SS		scaffold_102	+	25046	26684													103.796	135.031	12.742	0.0305	8.14597	0.486	0.768683	0.0231	10.5973
76606	76434	Hypothetical	TMHs		scaffold_147	+	62965	64640													1.728	2.258	1.612	0.887	1.07196	0.465	0.765279	0.182	1.40074
108976	108804	Hypothetical	TMHs		scaffold_118	+	80513	81917													54.214	70.907	9.58	0.00992	5.65908	0.282	0.764579	0.0077	7.40157
98846	98674	Hypothetical	SS/TMHs		scaffold_5	+	92522	93174													113.323	148.412	77.551	0.13	1.46127	0.185	0.76357	0.0591	1.91373
224988	224816	Hypothetical			scaffold_163	-	50486	52084													51.599	67.932	13.901	0.0252	3.71189	0.299	0.759568	0.00542	4.88684
125420	125248	Hypothetical			scaffold_13	+	225561	229113													84.858	112.254	29.865	0.0154	2.84139	0.134	0.755946	0.00764	3.75871
19494	19322	Hypothetical	SS/TMHs		scaffold_70	-	71377	72375													12.395	16.411	32.954	0.119	0.37613	0.418	0.755286	0.119	0.497997
127538	127366	Hypothetical	TMH		scaffold_51	+	113431	114126													15.21	20.161	4.672	0.0225	3.25557	0.19	0.754427	0.0147	4.31528
74677	74505	Hypothetical			scaffold_110	-	82096	82630													124.367	164.857	44.086	0.0469	2.82101	0.199	0.754393	0.0234	3.73944
467901	467729	Hypothetical			scaffold_86	-	27633	28457													30.822	40.872	36.271	0.687	0.84977	0.133	0.75411	0.758	1.12685
24337	24165	Hypothetical	TMHs		scaffold_64	-	97664	98900													28.986	38.489	463.236	0.00662	0.0625729	0.399	0.753098	0.0056	0.0830872
449047	448875	Hypothetical			scaffold_75	-	83650	84981													0.222	0.295	50.8	0.0013	0.00437008	0.659	0.752542	0.00556	0.00580709
113111	112939	Hypothetical	TMHs		scaffold_330	+	12767	14023													10.08	13.413	18.033	0.0912	0.558975	0.104	0.75151	0.312	0.743803
188606	188434	Hypothetical		150aa	scaffold_131	-	13700	14233													48.346	64.588	10.138	0.0165	4.76879	0.223	0.748529	0.00671	6.37088
333738	333566	Hypothetical			scaffold_30	-	59301	61100													26.836	35.993	9.756	0.0329	2.75072	0.128	0.745589	0.0134	3.68932
324941	324769	Hypothetical			scaffold_290	-	14442	15036													5.926	7.995	2.272	0.105	2.60827	0.221	0.741213	0.0479	3.51893
127697	127525	Hypothetical			scaffold_56	+	78361	79833													62.309	84.254	12.939	0.0233	4.8156	0.402	0.739538	0.0196	6.51163
127934	127762	Hypothetical	TMHs		scaffold_64	+	29166	30258													22.811	30.918	20.79	0.799	1.09721	0.116	0.73779	0.253	1.48716
122344	122172	Hypothetical			scaffold_217	-	28459	29933													6.629	9.059	2.845	0.0455	2.33005	0.161	0.731758	0.00877	3.18418
309425	309253	Hypothetical			scaffold_262	-	7420	8176													18.736	25.646	5.807	0.0359	3.22645	0.121	0.730562	0.0136	4.41639
26116	25944	Hypothetical	TMHs	IVS	scaffold_164	+	26960	28991													135.753	186.841	31.074	0.00618	4.3687	0.0635	0.72657	0.0032	6.01278
254157	253985	Hypothetical		87aa	scaffold_194	-	9369	9892													2.897	3.996	1.1	0.0389	2.63364	0.174	0.724975	0.00559	3.63273
18673	18501	Hypothetical			scaffold_24	+	144219	145402													47.092	64.985	57.967	0.603	0.812393	0.071	0.72466	0.78	1.12107
244536	244364	Hypothetical			scaffold_184	-	32494	34300													38.395	53.134	34.638	0.694	1.10846	0.161	0.722607	0.138	1.53398
76917	76745	Hypothetical			scaffold_155	+	56608	57509													44.646	62.195	54.446	0.679	0.820005	0.0644	0.717839	0.786	1.14232
125247	125075	Hypothetical	TMHs		scaffold_11	-	234561	236339													14.307	19.944	371.473	0.00159	0.0385142	0.229	0.717359	0.00145	0.053689
77508	77336	Hypothetical			scaffold_171	+	5374	5939													42.85	59.942	13.123	0.0439	3.26526	0.385	0.714858	0.0273	4.56771
429432	429260	Hypothetical		94aa	scaffold_65	+	82413	82936													295.911	416.632	81.925	0.0502	3.61197	0.524	0.710245	0.0591	5.08553
271046	270874	Hypothetical			scaffold_207	+	6945	8444													8.128	11.535	5.089	0.295	1.59717	0.0424	0.704638	0.104	2.26665
504919	504747	Hypothetical			scaffold_3	-	368891	375772													0.019	0.027	------	NaN	#VALUE!	NaN	0.703704	NaN	#VALUE!
33372	33200	Hypothetical			scaffold_7	-	56359	57760													71.106	101.13	12.843	0.0342	5.53656	0.379	0.703115	0.0359	7.87433
321283	321111	Hypothetical			scaffold_285	+	15670	17000													105.958	151.67	31.548	0.0391	3.35863	0.0387	0.698609	0.0184	4.80759
188692	188520	Hypothetical			scaffold_131	+	27158	28428													2.295	3.286	14.882	0.0505	0.154213	0.273	0.698418	0.0754	0.220804
117292	117120	Hypothetical			scaffold_40	+	127259	129014													41.162	58.956	26.501	0.0923	1.55322	0.0918	0.698182	0.0369	2.22467
122655	122483	Hypothetical			scaffold_240	-	13803	14990													55.252	79.184	58.88	0.783	0.938383	0.082	0.697767	0.24	1.34484
417891	417719	Hypothetical			scaffold_6	-	165086	166019													75.888	108.937	14.751	0.0474	5.1446	0.131	0.696623	0.0285	7.38506
128398	128226	Hypothetical		poor model	scaffold_79	-	39415	40353													16.404	23.553	2.655	0.0198	6.17853	0.0843	0.696472	0.0113	8.87119
128841	128669	Hypothetical			scaffold_97	-	1081	2352													31.296	45.09	9.176	0.028	3.41064	0.0589	0.694079	0.0142	4.91391
134561	134389	Hypothetical	SS		scaffold_1	+	264800	265623													6.456	9.326	20.946	0.00818	0.308221	0.071	0.692258	0.0315	0.44524
459495	459323	Hypothetical			scaffold_80	-	40413	41571													9.696	14.028	13.81	0.495	0.7021	0.271	0.691189	0.976	1.01579
375390	375218	Hypothetical			scaffold_41	-	23553	24124													10.042	14.532	2.969	0.0208	3.38228	0.098	0.691027	0.00718	4.89458
265790	265618	Hypothetical			scaffold_20	-	74437	75442													12.201	17.688	6.891	0.152	1.77057	0.15	0.68979	0.0659	2.56683
225273	225101	Hypothetical			scaffold_164	+	11851	12628													1.344	1.964	0.529	0.0788	2.54064	0.266	0.684318	0.0339	3.71267
314801	314629	Hypothetical			scaffold_276	+	499	1072													0.357	0.522	------	NaN	#VALUE!	0.411	0.683908	NaN	#VALUE!
19794	19622	Hypothetical			scaffold_98	+	55714	56437													51.146	75.034	24.277	0.0676	2.10677	0.118	0.681638	0.00974	3.09074
125117	124945	Hypothetical	TMHs		scaffold_10	-	156568	157705													996.481	1463.56	8221.33	0.00787	0.121207	0.192	0.68086	0.00743	0.17802
389155	388983	Hypothetical			scaffold_47	+	39749	41669													11.253	16.54	4.283	0.0156	2.62736	0.054	0.680351	0.0077	3.86178
28188	28016	Hypothetical	TMHs		scaffold_10	-	235278	237233													42.23	62.074	189.707	0.0062	0.222606	0.0604	0.680317	0.0176	0.32721
22010	21838	Hypothetical			scaffold_11	-	194971	195689													18.887	27.905	3.233	0.0167	5.84194	0.324	0.676832	0.0139	8.6313
20691	20519	Hypothetical		74 aa	scaffold_262	-	5327	5597													18.975	28.045	3.848	0.0382	4.93113	0.167	0.676591	0.0224	7.2882
45021	44849	Hypothetical			scaffold_290	+	19001	19297													32.272	47.841	3.452	0.112	9.34878	0.0641	0.674568	0.0696	13.8589
216318	216146	Hypothetical	TMH		scaffold_156	+	54119	54758													412.49	614.875	11502	0.00461	0.0358624	0.398	0.670852	0.00727	0.053458
129674	129502	Hypothetical	TMHs		scaffold_137	-	27292	28963													101.56	151.412	27.666	0.0275	3.67093	0.0385	0.670753	0.0123	5.47285
72613	72441	Hypothetical	TMHs		scaffold_77	+	82197	82886													4.184	6.24	104.052	0.00689	0.0402107	0.19	0.670513	0.0105	0.05997
488238	488066	Hypothetical			scaffold_99	+	68167	70052													27.177	40.625	7.7	0.0463	3.52948	0.0893	0.668972	0.0152	5.27597
120455	120283	Hypothetical			scaffold_121	+	58049	59006													7.202	10.824	13.965	0.408	0.515718	0.0316	0.665373	0.751	0.775081
119618	119446	Hypothetical		94aa	scaffold_94	-	66978	67368													2555.13	3843.91	167.315	0.0851	15.2714	0.448	0.664722	0.056	22.9741
478983	478811	Hypothetical			scaffold_91	-	55199	55989													11.541	17.378	3.96	0.0433	2.91439	0.0572	0.664116	0.019	4.38838
334588	334416	Hypothetical		143aa	scaffold_30	+	129704	130612													1.854	2.797	0.422	0.0239	4.39336	0.211	0.662853	0.00483	6.62796
490882	490710	Hypothetical			scaffold_11	+	198841	199891													20.795	31.437	3.029	0.0238	6.8653	0.191	0.661482	0.0136	10.3787
135282	135110	Hypothetical			scaffold_1	-	318575	319901													5.943	8.99	1.222	0.017	4.86334	0.186	0.661068	0.00862	7.35679
152335	152163	Hypothetical			scaffold_107	-	40895	41965													19.595	29.683	7.077	0.0212	2.76883	0.101	0.660142	0.00952	4.19429
300114	299942	Hypothetical			scaffold_249	+	1	651													160.36	243.988	134.934	0.699	1.18843	0.144	0.657245	0.204	1.8082
124663	124491	Hypothetical	SS		scaffold_6	-	15179	15945													20.732	31.585	29.397	0.68	0.705242	0.247	0.656388	0.94	1.07443
125923	125751	Hypothetical	TMHs		scaffold_21	+	27562	29330													613.594	942.709	48	0.0149	12.7832	0.595	0.650884	0.033	19.6398
121421	121249	Hypothetical			scaffold_162	-	16090	16903													13.163	20.285	2.763	0.0483	4.76402	0.107	0.648903	0.0234	7.34166
72213	72041	Hypothetical	TMHs		scaffold_72	+	59404	60616													23.994	37.019	7.172	0.0318	3.34551	0.275	0.648154	0.0392	5.1616
36212	36040	Hypothetical	SS		scaffold_86	-	10880	11685													241.956	374.683	650.304	0.113	0.372066	0.398	0.645762	0.244	0.576166
32612	32440	Hypothetical		78aa	scaffold_301	+	284	741													157.667	244.33	8.496	0.0159	18.5578	0.0967	0.645303	0.0102	28.7582
34972	34800	Hypothetical	SS		scaffold_37	+	154327	155915													4081.15	6363.67	237.043	0.0318	17.2169	0.184	0.64132	0.0203	26.8461
212738	212566	Hypothetical	TMHs		scaffold_152	+	729	2971													49.539	77.257	7.827	0.0174	6.32924	0.216	0.641223	0.000817	9.87058
20456	20284	Hypothetical		102aa	scaffold_190	+	594	1088													79.627	127.612	36.869	0.0798	2.15973	0.12	0.623977	0.00917	3.46123
183147	182975	Hypothetical		Possible FMN OR	scaffold_129	+	2078	2962													17.753	28.538	2.793	0.0131	6.35625	0.173	0.622083	0.00344	10.2177
129697	129525	Hypothetical			scaffold_138	+	50128	52102													98.775	159.24	29.136	0.0496	3.39014	0.138	0.62029	0.0162	5.4654
404495	404323	Hypothetical			scaffold_51	-	137609	138416													6.32	10.313	1.361	0.0332	4.64364	0.148	0.612819	0.00898	7.57752
289956	289784	Hypothetical			scaffold_23	-	184429	185004													15.692	25.617	5.689	0.0205	2.75831	0.0471	0.612562	0.00663	4.5029
254828	254656	Hypothetical	SS		scaffold_195	-	13024	13432													24.013	39.221	3.227	0.00219	7.44128	0.432	0.612249	0.0301	12.154
130621	130449	Hypothetical			scaffold_206	+	42274	42942													15.767	25.831	5.574	0.0435	2.82867	0.114	0.610391	0.0149	4.63419
10209	10037	Hypothetical			scaffold_2	-	445022	446404													135.649	222.64	81.755	0.693	1.65921	0.14	0.609275	0.428	2.72326
428755	428583	Hypothetical			scaffold_65	+	20132	20975													4.818	8.053	1.002	0.00568	4.80838	0.0916	0.598286	0.00517	8.03693
114305	114133	Hypothetical	SS		scaffold_6	-	16822	17354													3.382	5.69	21.486	0.409	0.157405	0.167	0.594376	0.542	0.264824
130269	130097	Hypothetical	SS		scaffold_175	-	24825	25546													7.074	12.014	99.88	0.0299	0.070825	0.419	0.588813	0.00839	0.120284
159705	159533	Hypothetical	TMHs		scaffold_11	-	262172	263607													39	66.281	15.914	0.0445	2.45067	0.0791	0.588404	0.0082	4.16495
247782	247610	Hypothetical	SS/TMHs		scaffold_189	-	41286	42642													0.503	0.858	0.327	0.253	1.53823	0.223	0.586247	0.0728	2.62385
18264	18092	Hypothetical		65aa	scaffold_11	+	216551	217122													137.376	235.462	13.479	0.0767	10.1919	0.465	0.583432	0.0465	17.4688
37280	37108	Hypothetical	SS/TMHs		scaffold_150	+	15828	16791													78.375	134.517	4.726	0.0148	16.5838	0.258	0.58264	0.00022	28.4632
63801	63629	Hypothetical	TMHs	99aa	scaffold_9	+	291870	292222													290.091	499.64	24.032	0.128	12.071	0.263	0.5806	0.0778	20.7906
327311	327139	Hypothetical			scaffold_299	+	17604	19554													2.82	4.881	3.73	0.292	0.756032	0.0861	0.57775	0.395	1.30858
53596	53424	Hypothetical	TMHs		scaffold_215	+	11324	11648													13.733	23.981	7.557	0.0536	1.81726	0.00818	0.572662	0.00758	3.17335
432525	432353	Hypothetical	TMH		scaffold_67	+	67080	69112													8.724	15.243	7.347	0.746	1.18742	0.0323	0.572328	0.191	2.07472
18241	18069	Hypothetical	SS		scaffold_11	+	30505	31391													40.989	71.636	1227.52	0.00016	0.0333917	0.0101	0.572184	0.000299	0.0583582
151311	151139	Hypothetical			scaffold_106	+	56685	58268													31.294	55.116	27.225	0.594	1.14946	0.0304	0.567784	0.0375	2.02446
19412	19240	Hypothetical	SS/TMHs		scaffold_64	-	105593	107146													16.654	29.476	36.267	0.0263	0.459205	0.00458	0.565002	0.335	0.81275
129315	129143	Hypothetical	SS		scaffold_118	+	55579	56871													99.868	177.218	22.208	0.0242	4.49694	0.168	0.563532	0.0102	7.97992
424721	424549	Hypothetical			scaffold_62	-	85341	86220													64.585	115.085	2.612	0.0136	24.7263	0.0595	0.561194	0.00551	44.0601
10004	9832	Hypothetical			scaffold_1	-	314009	315225													0.963	1.718	4.951	0.0533	0.194506	0.114	0.560536	0.0839	0.347001
66170	65998	Hypothetical	TMHs	140aa	scaffold_20	+	121118	121594													27.629	49.322	6.542	0.0136	4.22333	0.0264	0.560176	0.00399	7.53928
37880	37708	Hypothetical	TMHs		scaffold_212	+	16867	19677													1.243	2.226	1.228	0.979	1.01221	0.161	0.558401	0.231	1.8127
502753	502581	Hypothetical		lg IVS	scaffold_253	-	1606	3378													0.155	0.279	0.155	NaN	1	0.383	0.555556	NaN	1.8
510710	510538	Hypothetical	TMHs		scaffold_50	+	17729	19782													0.661	1.192	0.421	0.486	1.57007	0.295	0.55453	0.0292	2.83135
226924	226752	Hypothetical	TMH	71aa	scaffold_166	-	3520	3952													9.99	18.026	4.628	0.0815	2.1586	0.0489	0.554199	0.00907	3.89499
185524	185352	Hypothetical	TMH	poor model	scaffold_13	+	135499	137703													15.531	28.431	5.249	0.045	2.95885	0.13	0.54627	0.0127	5.41646
375944	375772	Hypothetical	TMHs		scaffold_41	-	81680	83418													7.529	13.789	6.922	0.798	1.08769	0.0325	0.546015	0.0493	1.99205
244134	243962	Hypothetical			scaffold_183	+	28046	30133													4.823	8.836	18.009	0.138	0.267811	0.0144	0.545835	0.351	0.490644
116567	116395	Hypothetical	TMHs		scaffold_29	-	150868	152433													2.421	4.469	0.702	0.00619	3.44872	0.0483	0.541732	0.00638	6.3661
326555	326383	Hypothetical		poor model	scaffold_296	-	11433	13829													11.069	20.48	1.723	0.0455	6.42426	0.00961	0.540479	0.0195	11.8862
11492	11320	Hypothetical			scaffold_18	-	72963	73798													32.117	60.814	34.411	0.768	0.933335	0.0486	0.528119	0.123	1.76728
181968	181796	Hypothetical		98aa	scaffold_127	+	31479	32031													1.238	2.398	0.422	0.0531	2.93365	0.0935	0.516264	0.00625	5.68246
15794	15622	Hypothetical			scaffold_162	-	9264	10688													0.929	1.801	0.345	0.0177	2.69275	0.0421	0.515825	0.00927	5.22029
79261	79089	Hypothetical	SS		scaffold_237	+	2571	3092													0.544	1.079	0.498	0.872	1.09237	NaN	0.504171	NaN	2.16667
216954	216782	Hypothetical			scaffold_157	+	17958	19320													5.02	10.063	17.202	0.136	0.291827	0.032	0.498857	0.447	0.58499
103337	103165	Hypothetical	IVS	bad model	scaffold_32	+	86845	91386													8.686	17.419	4.85	0.0645	1.79093	0.00494	0.498651	0.0104	3.59155
199974	199802	Hypothetical			scaffold_140	-	40718	41294													15.04	30.208	12.302	0.611	1.22257	0.0197	0.497881	0.0639	2.45554
14514	14342	Hypothetical			scaffold_98	+	35248	36729													8.74	17.571	4.702	0.111	1.85878	0.0457	0.497411	0.0166	3.73692
412800	412628	Hypothetical	SS/TMHs		scaffold_57	+	38930	40770													14.199	28.633	10.467	0.364	1.35655	0.0347	0.495896	0.0346	2.73555
381843	381671	Hypothetical		120aa	scaffold_43	-	145265	145908													4.254	8.585	2.548	0.189	1.66954	0.0036	0.495515	0.0323	3.36931
262452	262280	Hypothetical	TMHs		scaffold_2	-	406224	408961													20.702	41.789	6.921	0.038	2.99119	0.0519	0.495394	0.00298	6.038
19470	19298	Hypothetical	SS		scaffold_69	-	40164	41349													36.262	73.208	11.793	0.197	3.07487	0.0397	0.495328	0.0612	6.20775
467686	467514	Hypothetical			scaffold_86	-	12114	12830													17.632	35.66	7.26	0.0394	2.42865	0.0435	0.494448	0.0122	4.91185
161917	161745	Hypothetical	SS/TMHs		scaffold_111	-	6253	7802													14.624	29.588	3.766	0.0582	3.88317	0.0169	0.494254	0.0195	7.85661
24529	24357	Hypothetical	TMHs		scaffold_71	+	68723	70724													50.676	102.567	55.935	0.856	0.90598	0.0175	0.494077	0.265	1.83368
114141	113969	Hypothetical	SS, TMHs		scaffold_4	-	303504	304982													2.847	5.764	6.694	0.043	0.425306	0.0094	0.493928	0.626	0.86107
14325	14153	Hypothetical			scaffold_91	-	8286	9997													10.399	21.164	13.168	0.619	0.789717	0.0348	0.491353	0.345	1.60723
313946	313774	Hypothetical			scaffold_272	+	7259	8854													3.629	7.389	3.895	0.742	0.931707	0.00439	0.491135	0.0502	1.89705
129903	129731	Hypothetical			scaffold_149	+	48069	49278													32.753	66.838	11.531	0.0875	2.84043	0.00899	0.490036	0.023	5.79637
283440	283268	Hypothetical	TMHs		scaffold_220	-	16912	18803													8.584	17.556	5.32	0.359	1.61353	0.0135	0.48895	0.0598	3.3
31787	31615	Hypothetical			scaffold_159	-	730	1634													18.417	37.744	7.889	0.154	2.33452	0.0133	0.487945	0.0381	4.78438
149428	149256	Hypothetical			scaffold_104	+	74914	75700													6.632	13.774	10.65	0.241	0.622723	0.0298	0.481487	0.538	1.29333
187005	186833	Hypothetical		poor model	scaffold_13	-	262629	263770													5.383	11.184	3.223	0.458	1.67018	0.0385	0.481313	0.129	3.47006
36815	36643	Hypothetical			scaffold_118	-	67598	68768													25.239	52.478	15.679	0.106	1.60973	0.00939	0.480944	0.00933	3.34702
421370	421198	Hypothetical			scaffold_60	+	82171	82568													1.8	3.766	2.845	0.464	0.632689	0.169	0.477961	0.518	1.32373
123431	123259	Hypothetical	TMHs, alt model		scaffold_333	-	6814	7673													11.254	23.74	9.199	0.625	1.22339	0.0475	0.474052	0.0388	2.58072
349654	349482	Hypothetical	TMHs		scaffold_335	-	10460	13169													8.203	17.339	4.306	0.0712	1.90502	0.00695	0.473095	0.00813	4.02671
403185	403013	Hypothetical			scaffold_51	+	16818	18591													12.705	26.89	15.243	0.686	0.833497	0.0053	0.47248	0.222	1.76409
488061	487889	Hypothetical			scaffold_99	-	56959	59065													0.849	1.799	0.875	0.912	0.970286	0.00777	0.471929	0.0447	2.056
355389	355217	Hypothetical		poor model	scaffold_35	-	144450	146725													8.437	18.017	7.582	0.736	1.11277	0.0453	0.46828	0.0552	2.37629
183260	183088	Hypothetical		109aa	scaffold_129	+	7940	8612													4.722	10.123	4.254	0.668	1.11001	0.00568	0.466463	0.0223	2.37964
126587	126415	Hypothetical			scaffold_31	+	54154	55749													8.438	18.14	23.873	0.0117	0.353454	0.0149	0.46516	0.355	0.759854
267506	267334	Hypothetical			scaffold_20	-	217284	218434													4.774	10.396	3.459	0.263	1.38017	0.0148	0.459215	0.0296	3.00549
417584	417412	Hypothetical			scaffold_6	+	115666	116670													14.949	32.658	13.539	0.786	1.10414	0.047	0.457744	0.0362	2.41214
22288	22116	Hypothetical			scaffold_15	+	103224	104066													22.532	49.239	15.761	0.252	1.4296	0.0254	0.457605	0.0194	3.1241
24968	24796	Hypothetical	82 aa		scaffold_91	+	63069	63314													5.782	12.708	11.99	0.33	0.482235	0.0441	0.454989	0.945	1.05988
54202	54030	Hypothetical			scaffold_466	+	3606	3785													13.176	29.313	11.755	0.645	1.12088	0.0197	0.449493	0.044	2.49366
203660	203488	Hypothetical	SS, TMH	129aa	scaffold_144	+	53453	54587													6.05	13.494	3.397	0.102	1.78098	0.00131	0.448347	0.0134	3.97233
113472	113300	Hypothetical			scaffold_1	-	145023	146326													2.441	5.455	2.143	0.58	1.13906	0.00379	0.447479	0.0252	2.5455
19612	19440	Hypothetical			scaffold_80	-	101473	102366													15.32	34.432	10.401	0.249	1.47294	0.0216	0.444935	0.0188	3.31045
90978	90806	Hypothetical			scaffold_79	+	90322	90835													12.523	28.353	1.631	0.0414	7.67811	0.179	0.441682	0.0297	17.3838
381765	381593	Hypothetical			scaffold_43	-	140124	140847													55.901	127.218	68.393	0.582	0.81735	0.0343	0.439411	0.103	1.8601
182757	182585	Hypothetical			scaffold_128	-	25127	27945													0.476	1.091	1.152	0.0477	0.413194	0.00795	0.436297	0.864	0.947049
334214	334042	Hypothetical	SS/TMH		scaffold_30	+	96321	97504													8.221	18.957	9.54	0.703	0.86174	0.0177	0.433666	0.107	1.98711
29791	29619	Hypothetical			scaffold_44	+	119766	120943													23.29	53.822	25.791	0.818	0.903028	0.0484	0.432723	0.0802	2.08685
117950	117778	Hypothetical	TMHs		scaffold_53	+	51385	52692													1.766	4.093	2.747	0.11	0.642883	0.00311	0.431468	0.12	1.48999
165789	165617	Hypothetical	SS		scaffold_114	+	67824	68616													23.443	54.379	4.89	0.0488	4.79407	0.0975	0.431104	0.00142	11.1204
348971	348799	Hypothetical			scaffold_332	-	9429	10199													2.438	5.666	0.428	0.0216	5.69626	0.0333	0.430286	0.00129	13.2383
34453	34281	Hypothetical	TMHs		scaffold_25	+	176199	177579													41.825	97.582	3.129	0.000185	13.3669	0.0108	0.428614	0.000244	31.1863
348644	348472	Hypothetical	SS, 114aa		scaffold_330	-	3917	4586													2.099	4.906	16.497	0.00406	0.127235	0.00261	0.427843	0.0275	0.297387
119155	118983	Hypothetical	SS/TMHs	very small model	scaffold_81	-	53984	54300													0.303	0.709	------	NaN	#VALUE!	0.134	0.427362	NaN	#VALUE!
501556	501384	Hypothetical	alt model		scaffold_230	+	11018	11734													4.628	10.901	3.735	0.649	1.23909	0.042	0.424548	0.0314	2.91861
255929	255757	Hypothetical	TMHs	poor model	scaffold_197	+	8112	8821													6.974	16.512	6.876	0.971	1.01425	0.0295	0.422359	0.055	2.4014
13720	13548	Hypothetical			scaffold_70	-	21607	22652													9.747	23.312	5.99	0.222	1.62721	0.0482	0.418111	0.027	3.89182
234680	234508	Hypothetical			scaffold_172	-	6715	8140													9.94	24.001	12.59	0.378	0.789515	0.00637	0.414149	0.0557	1.90635
443832	443660	Hypothetical	TMHs	IVSs	scaffold_71	-	96090	97960													6.228	15.073	6.689	0.8	0.931081	0.00618	0.413189	0.0338	2.2534
378918	378746	Hypothetical		poor model	scaffold_42	+	107910	108895													4.161	10.095	4.607	0.812	0.903191	0.0159	0.412184	0.0796	2.19123
114642	114470	Hypothetical			scaffold_8	-	269199	271531													5.88	14.276	4.406	0.218	1.33454	0.013	0.41188	0.023	3.24013
447218	447046	Hypothetical	alt model		scaffold_74	+	49757	50692													10.73	26.078	6.694	0.193	1.60293	0.0211	0.411458	0.027	3.89573
53551	53379	Hypothetical			scaffold_275	-	22111	22314													0.751	1.839	0.467	0.455	1.60814	0.331	0.408374	0.172	3.9379
363804	363632	Hypothetical	SS,TMH		scaffold_38	-	100268	101919													10.18	25.038	0.988	0.0306	10.3036	0.0355	0.406582	0.00744	25.3421
493235	493063	Hypothetical	TMHs	IVSs	scaffold_134	-	16540	19072													1.177	2.963	0.684	0.34	1.72076	0.00361	0.397233	0.0561	4.33187
123606	123434	Hypothetical			scaffold_379	+	6636	9074													0.045	0.114	0.135	NaN	0.333333	NaN	0.394737	NaN	0.844444
17225	17053	Hypothetical		lg IVS	scaffold_314	+	12629	17286													0.026	0.066	------	NaN	#VALUE!	NaN	0.393939	NaN	#VALUE!
123846	123674	Hypothetical			scaffold_506	-	566	1891													0.047	0.12	------	NaN	#VALUE!	NaN	0.391667	NaN	#VALUE!
183395	183223	Hypothetical			scaffold_129	-	22331	24955													5.997	15.736	7.146	0.634	0.839211	0.0397	0.381101	0.103	2.20207
356575	356403	Hypothetical			scaffold_358	-	9558	10373													10.692	28.202	4.855	0.0775	2.20227	0.0441	0.379122	0.0223	5.80886
421251	421079	Hypothetical	alt model		scaffold_60	+	74296	74991													6.906	18.389	4.798	0.299	1.43935	0.0145	0.375551	0.0193	3.83264
119728	119556	Hypothetical	TMHs		scaffold_98	-	16752	17431													5.363	14.302	4.909	0.787	1.09248	0.0298	0.374983	0.0382	2.91342
163474	163302	Hypothetical		102aa	scaffold_112	-	42362	43081													6.051	16.277	2.813	0.0733	2.15108	0.00834	0.371752	0.0117	5.78635
401952	401780	Hypothetical	2 TMH	92 aa	scaffold_50	-	79132	79854													44.235	121.088	7.046	0.116	6.27803	0.00215	0.365313	0.0405	17.1854
270727	270555	Hypothetical			scaffold_206	-	14351	14979													0.746	2.054	2.621	0.0249	0.284624	0.00151	0.363194	0.426	0.78367
421388	421216	Hypothetical			scaffold_60	-	85751	86887													7.611	21.005	14.042	0.541	0.542017	0.0392	0.362342	0.663	1.49587
38576	38404	Hypothetical			scaffold_543	-	105	1212													9.723	26.865	10.904	0.779	0.891691	0.0263	0.361921	0.0224	2.46377
414017	413845	Hypothetical			scaffold_57	+	131155	131689													4.149	11.744	2.504	0.165	1.65695	0.0192	0.353287	0.0154	4.6901
18841	18669	Hypothetical		117aa	scaffold_31	+	78561	79076													3.565	10.173	17.597	0.00712	0.202591	0.00166	0.350437	0.0955	0.57811
67349	67177	Hypothetical		120aa	scaffold_27	-	152161	152520													1.139	3.313	0.748	0.459	1.52273	0.0625	0.343797	0.00293	4.42914
218558	218386	Hypothetical	IVS, alt model		scaffold_159	+	30695	31950													7.73	22.761	6.884	0.785	1.12289	0.027	0.339616	0.0277	3.30636
437568	437396	Hypothetical	5' TMH	88aa	scaffold_7	-	96013	96614													5.296	15.89	7.088	0.336	0.747178	0.00131	0.333291	0.0644	2.24182
116263	116091	Hypothetical			scaffold_25	-	134687	135433													65.509	198.227	177.916	0.529	0.368202	0.00576	0.330475	0.949	1.11416
11101	10929	Hypothetical			scaffold_12	+	176080	177138													5.03	15.803	2.151	0.152	2.33845	0.0414	0.318294	0.0152	7.34682
13842	13670	Hypothetical			scaffold_74	+	71590	72163													1.7	5.371	6.531	0.282	0.260297	0.00362	0.316515	0.877	0.822386
164289	164117	Hypothetical			scaffold_113	+	13868	14578													5.587	17.679	1.795	0.0415	3.11253	0.0246	0.316025	0.00349	9.84903
480814	480642	Hypothetical		117aa	scaffold_93	+	6935	7585													0.236	0.747	0.548	0.0665	0.430657	0.00479	0.31593	0.239	1.36314
129209	129037	Hypothetical	5' TMH		scaffold_113	+	48985	49858													2.69	8.578	3.909	0.193	0.688156	0.000542	0.313593	0.0363	2.19442
377055	376883	Hypothetical	TMHs		scaffold_41	-	157740	158584													1.199	3.895	1.492	0.438	0.803619	0.000315	0.307831	0.027	2.61059
401982	401810	Hypothetical			scaffold_50	-	80970	82436													14.54	47.639	24.34	0.604	0.597371	0.00598	0.305212	0.476	1.95723
118217	118045	Hypothetical			scaffold_58	-	132874	133284													0.314	1.032	0.655	0.106	0.479389	0.0274	0.304264	0.143	1.57557
180090	179918	Hypothetical	TMHs		scaffold_124	-	68294	69989													0.924	3.142	0.634	0.265	1.45741	0.00793	0.29408	0.0128	4.95584
502823	502651	Hypothetical			scaffold_254	+	23808	25415													1.956	6.737	2.506	0.343	0.780527	0.00959	0.290337	0.0458	2.68835
286833	286661	Hypothetical	TMH		scaffold_227	+	25248	27110													32.352	119.671	12.858	0.404	2.5161	0.00879	0.270341	0.0849	9.30712
46242	46070	Hypothetical			scaffold_529	-	34	241													1720.14	6785.12	3379.45	0.154	0.508999	0.0777	0.253516	0.32	2.00776
267097	266925	Hypothetical	SS/TMH		scaffold_20	-	192932	193686													76.505	365.827	48.428	0.746	1.57977	0.0259	0.209129	0.2	7.55404
30884	30712	Hypothetical			scaffold_94	+	3634	4661													1178.56	6195.64	2960.95	0.108	0.398034	0.0627	0.190224	0.349	2.09245
129381	129209	Hydroxyproline-rich glycoprotein			scaffold_122	-	5270	10782													55.394	40.971	26.267	0.0972	2.10888	0.121	1.35203	0.261	1.55979	6387	UDP-N-acetylmuramoylalanyl-D-glutamyl-2,6-diaminopimelate-D-alanyl-D-alanine ligase activity										6.3.2.-	Acid--D-amino-acid ligases (peptide synthases).	\N	\N	Tryptophan metabolism	Amino Acid Metabolism	METABOLIC
124866	124694	Hydrophobin			scaffold_8	-	30174	30968													12.915	5.899	1.92	0.0199	6.72656	0.00472	2.18935	0.0544	3.0724	3531	structural constituent of cell wall	IPR001338	Fungal hydrophobin	HMMPfam	PF01185	Hydrophobin	1	27,	158,	6.1e-48
18014	17842	Hydrophobin			scaffold_6	+	117052	117473													5.309	1.881	2.242	0.174	2.36798	0.0704	2.82243	0.817	0.838983	3531	structural constituent of cell wall	IPR001338	Fungal hydrophobin	HMMPfam	PF01185	Hydrophobin	1	1,	86,	1e-10
20832	20660	Hydrophobin			scaffold_346	+	6264	6986													14.432	7.042	49.555	0.0499	0.291232	0.17	2.04942	0.02	0.142105	3531	structural constituent of cell wall	IPR001338	Fungal hydrophobin	HMMPfam	PF01185	Hydrophobin	1	5,	111,	4.3e-37
127321	127149	Hydrophobin			scaffold_46	-	76208	76717													10.501	9.815	10.774	0.938	0.974661	0.71	1.06989	0.79	0.910989	3531	structural constituent of cell wall	IPR001338	Fungal hydrophobin	HMMPfam	PF01185	Hydrophobin	1	5,	107,	1.1e-37
509486	509314	Hydrophobin			scaffold_46	-	64398	64941													22.405	21.831	4.523	0.091	4.95357	0.939	1.02629	0.0728	4.82666	3531	structural constituent of cell wall	IPR001338	Fungal hydrophobin	HMMPfam	PF01185	Hydrophobin	1	7,	109,	7.6e-44
104792	104620	Hydrophobin			scaffold_46	-	77858	78299													2.165	2.425	9.91	0.137	0.218466	0.798	0.892784	0.147	0.244702	3531	structural constituent of cell wall	IPR001338	Fungal hydrophobin	HMMPfam	PF01185	Hydrophobin	1	5,	111,	1e-33
69875	69703	Hydrophobin			scaffold_46	-	67166	67626													2.609	3.054	0.653	0.0653	3.99541	0.602	0.854289	0.0574	4.67688	3531	structural constituent of cell wall	IPR001338	Fungal hydrophobin	HMMPfam	PF01185	Hydrophobin	1	7,	117,	1.2e-45
39287	39115	Hydrophobin			scaffold_30	-	47407	47800													1.142	1.55	0.836	0.634	1.36603	0.497	0.736774	0.338	1.85407	3531	structural constituent of cell wall	IPR001338	Fungal hydrophobin	HMMPfam	PF01185	Hydrophobin	1	1,	92,	2.9e-37
27972	27800	Hydrophobin			scaffold_8	+	34012	34783													8.823	10.223	30.422	0.167	0.29002	0.363	0.863054	0.193	0.33604	2771	glyceraldehyde-3-phosphate dehydrogenase (phosphorylating) activity	IPR001338	Fungal hydrophobin	HMMPfam	PF01185	Hydrophobin	1	7,	137,	9.8e-49
114560	114388	hydrophobin	ss		scaffold_8	+	39934	40416													0.532	0.512	1.931	NaN	0.275505	0.965	1.03906	NaN	0.265148
454960	454788	Hydrophobin			scaffold_8	+	36686	37411													4.49	7.024	4.846	0.888	0.926537	0.369	0.639237	0.418	1.44944	2227	structural constituent of ribosome	IPR001338	Fungal hydrophobin	HMMPfam	PF01185	Hydrophobin	1	5,	107,	1.8e-31
20591	20419	Hydrogen ion transporter	TMHs		scaffold_221	-	23409	24629	1	0.28853	0	0	0	0	2	0.67456	2	3.3439	2	2.0792	235.51	243.665	360.369	0.157	0.653525	0.831	0.966532	0.2	0.676154	3736	ATP binding	IPR000245	ATPase, V0 complex, proteolipid subunit C,	FPrintScan	PR00122	VACATPASE	4	28,54,102,129,	52,78,128,152,	8.4e-59,8.4e-59,8.4e-59,8.4e-59	3.6.3.14	H(+)-transporting two-sector ATPase.	ATP + H(2)O + H(+)(In) = ADP + phosphate + H(+)(Out).	\N	ATP synthesis	Energy Metabolism	METABOLIC
114439	114267	HTP reductase			scaffold_7	-	67185	68254													49.702	68.67	41.652	0.569	1.19327	0.118	0.72378	0.116	1.64866	6331	5-amino-6-(5-phosphoribosylamino)uracil reductase activity	IPR002734	Bacterial bifunctional deaminase-reductase, C-terminal	HMMPfam	PF01872	RibD_C	1	49,	275,	5.3e-41	1.1.1.193	5-amino-6-(5-phosphoribosylamino)uracil reductase.	5-amino-6-(5-phosphoribitylamino)uracil + NADP(+) = 5-amino-6-(5- phosphoribosylamino)uracil + NADPH.	\N	Riboflavin metabolism	Metabolism of Cofactors and Vitamins	METABOLIC
36036	35864	Hsk-1 interacting molecule			scaffold_77	-	32203	35311													15.24	14.454	18.135	0.621	0.840364	0.715	1.05438	0.526	0.797022	3827	intracellular	IPR006572	Zinc finger, DBF-type	HMMPfam	PF07535	zf-DBF	1	515,	558,	1.2e-13
18426	18254	Homocysteine S-methyltransferase			scaffold_15	-	264567	267506	6	0.4276	3	0.12102	2	0.026531	1	0.057709	0	0	0	0	141.865	112.607	210.647	0.548	0.673473	0.24	1.25982	0.323	0.534577	2337	5-methyltetrahydropteroyltriglutamate-homocysteine S-methyltransferase activity	IPR002629	Methionine synthase, vitamin-B12 independent	BlastProDom	PD004692	Q9P444_EMENI_Q9P444;	1	659,	754,	9e-29	2.1.1.14	5-methyltetrahydropteroyltriglutamate--homocysteine S-methyltransferase.	5-methyltetrahydropteroyltri-L-glutamate + L-homocysteine = tetrahydropteroyltri-L-glutamate + L-methionine.	\N	Methionine metabolism	Amino Acid Metabolism	METABOLIC	1.984	2.0986
17546	17374	homeodomain transcription factor			scaffold_435	-	90	1615													0.053	0.271	------	NaN	#VALUE!	NaN	0.195572	NaN	#VALUE!	2196	transcription factor activity	IPR001356	Homeobox	BlastProDom	PD000010	ZFH2_DROME_P28167;	1	27,	84,	0.0003
25990	25818	Hob1			scaffold_151	+	52574	54274													131.346	148.286	56.247	0.0422	2.33516	0.33	0.885761	0.0297	2.63634	3727	protein binding	IPR001452	Src homology-3	BlastProDom	PD000066	HOB1_SCHPO_O74352;	1	374,	426,	3e-16
76799	76627	Histone methyltransferase			scaffold_152	+	30544	31163													62.414	54.669	24.496	0.027	2.54793	0.372	1.14167	0.0358	2.23175	3838	nucleus	IPR001214	SET	HMMPfam	PF00856	SET	1	25,	154,	4.3e-54
71848	71676	Histone H3	59 aa		scaffold_67	+	13928	14104													150.12	65.745	81.211	0.314	1.84852	0.0469	2.28337	0.758	0.809558	587	nucleosome	IPR000164	Histone H3	FPrintScan	PR00622	HISTONEH3	3	1,19,35,	19,35,56,	1.5e-30,1.5e-30,1.5e-30
20125	19953	Histone H2B			scaffold_135	-	8769	9544													437.381	334.563	595.529	0.532	0.734441	0.265	1.30732	0.292	0.561791	587	nucleosome	IPR000558	Histone H2B	BlastProDom	PD000497	H2B_AGABI_P78567;	1	79,	143,	7e-28								7.7057	6.151
131013	130841	Histone deacetylase			scaffold_252	+	14785	16813													43.685	47.989	15.613	0.0472	2.79799	0.682	0.910313	0.0331	3.07366	2805	histone deacetylase activity	IPR000286	Histone deacetylase superfamily	FPrintScan	PR01270	HDASUPER	3	132,164,249,	155,179,259,	7.6e-23,7.6e-23,7.6e-23	3.5.1.48	Acetylspermidine deacetylase.	N1-acetylspermidine + H(2)O = acetate + spermidine.	\N	\N	\N	\N
108815	108643	Histone acetyltransferase			scaffold_116	+	17816	19373													66.356	59.139	21.13	0.0472	3.14037	0.379	1.12203	0.0477	2.79882	5765	N-acetyltransferase activity	IPR001487	Bromodomain	FPrintScan	PR00503	BROMODOMAIN	4	289,303,319,337,	302,319,337,356,	3.6e-18,3.6e-18,3.6e-18,3.6e-18	2.3.1.-	Transferring groups other than amino-acyl groups.	\N	\N	Benzoate degradation via CoA ligation	Biodegradation of Xenobiotics	METABOLIC
106287	106115	Histone			scaffold_67	-	12764	13355	5	5.5104	4	2.7838	6	1.8204	3	2.8264	4	8.3746	4	7.694	471.426	498.877	440.045	0.923	1.07131	0.867	0.944974	0.871	1.1337	587	nucleosome	IPR001951	Histone H4	BlastProDom	PD001827	H4_PHACH_P62792;	1	28,	103,	1e-36								3.8916	7.3036
109656	109484	Histone			scaffold_135	+	9801	10463	3	3.4716	3	1.8271	3	1.0988	4	3.6829	2	1.5545	2	3.5866	226.409	144.122	148.974	0.397	1.51979	0.182	1.57095	0.958	0.967431	587	nucleosome	IPR002119	Histone H2A	BlastProDom	PD000522	H2A_AGABI_Q9HGX4;	1	75,	130,	7e-22
432204	432032	Histone			scaffold_67	-	44481	45234	2	3.1938	1	1.692	2	3.2518	2	1.2082	2	11.63	1	3.3425	264.274	181.148	350.1	0.712	0.754853	0.28	1.45888	0.424	0.517418	587	nucleosome	IPR000164	Histone H3	FPrintScan	PR00622	HISTONEH3	7	3,17,37,61,83,101,117,	17,31,58,78,101,117,138,	1.6e-76,1.6e-76,1.6e-76,1.6e-76,1.6e-76,1.6e-76,1.6e-76								1.1966	1.6741
25117	24945	Histone			scaffold_99	-	21664	22458													150.919	83.802	53.911	0.0378	2.79941	0.0111	1.8009	0.208	1.55445	587	nucleosome	IPR002119	Histone H2A	BlastProDom	PD000522	Q7RSC4_PLAYO_Q7RSC4;	1	63,	137,	1e-29								1.6059	1.6059
107102	106930	Histone			scaffold_80	+	21634	22409													434.042	467.69	625.089	0.707	0.694368	0.809	0.928055	0.776	0.748197	587	nucleosome	IPR000558	Histone H2B	BlastProDom	PD000497	H2B_AGABI_P78567;	1	79,	143,	3e-28
20796	20624	Histidinol-phosphatase			scaffold_305	+	6801	7921													30.044	21.581	21.671	0.658	1.38637	0.358	1.39215	0.996	0.995847	2290	catalytic activity	IPR004013	PHP, C-terminal	HMMPfam	PF02811	PHP	1	3,	256,	1.3e-20	3.1.3.15	Histidinol-phosphatase.	L-histidinol-phosphate + H(2)O = L-histidinol + phosphate.	\N	Histidine metabolism	Amino Acid Metabolism	METABOLIC
507826	507654	Histidine kinase		Phytochrome-like	scaffold_393	-	738	5555													58.091	71.395	10.191	0.0289	5.70023	0.219	0.813656	0.0192	7.00569	4504	regulation of transcription, DNA-dependent	IPR001789	Signal transduction response regulator, receiver region	BlastProDom	PD000039	Q6SL93_BOTCI_Q6SL93;	1	1035,	1163,	2e-23	2.7.3.-	Phosphotransferases with a nitrogenous group as acceptor.	\N	\N	Type II secretion system	SORTING AND DEGRADATION	REGULATORY
128924	128752	Histidine kinase			scaffold_100	+	86336	96219													135.03	224.802	43.807	0.0313	3.08238	0.0602	0.600662	0.00566	5.13165	3043	protein kinase activity	IPR000719	Protein kinase, core	BlastProDom	PD000001	Q6SLB6_GIBMO_Q6SLB6;	1	169,	331,	1e-21	2.7.3.-	Phosphotransferases with a nitrogenous group as acceptor.	\N	\N	Type II secretion system	SORTING AND DEGRADATION	REGULATORY
93672	93500	High-affinity glucose transporter	TMHs		scaffold_138	+	1482	3704													212.044	171.09	545.601	0.102	0.388643	0.455	1.23937	0.0541	0.313581	3642	sugar:hydrogen symporter activity	IPR003663	Sugar transporter	FPrintScan	PR00171	SUGRTRNSPORT	5	26,124,291,380,403,	36,143,301,401,415,	3.3e-25,3.3e-25,3.3e-25,3.3e-25,3.3e-25	5.3.1.4	L-arabinose isomerase.	L-arabinose = L-ribulose.	\N	Pentose and glucuronate interconversions	Carbohydrate Metabolism	METABOLIC
98602	98430	Hexose transporter	TMHs		scaffold_4	-	47711	49762	1	0.079872	1	0.05701	3	0.060625	4	0.3687	0	0	0	0	2212.8	1794.37	62.504	0.00696	35.4026	0.323	1.23319	0.00879	28.7081	3642	sugar:hydrogen symporter activity	IPR005828	General substrate transporter	HMMPfam	PF00083	Sugar_tr	1	37,	486,	7.6e-88	5.3.1.4	L-arabinose isomerase.	L-arabinose = L-ribulose.	\N	Pentose and glucuronate interconversions	Carbohydrate Metabolism	METABOLIC	0.17895	0.82872
99025	98853	heparinase			scaffold_5	+	297315	299780													325.69	307.623	778.314	0.0296	0.418456	0.641	1.05873	0.0235	0.395243																			0.22089	0.81984
91916	91744	heme peroxidase			scaffold_98	-	46272	49637													9.586	4.446	3.934	0.0664	2.43671	0.136	2.1561	0.84	1.13015	2976	peroxidase activity	IPR002007	Haem peroxidase, animal	FPrintScan	PR00457	ANPEROXIDASE	4	199,315,377,514,	214,341,387,534,	1.1e-10,1.1e-10,1.1e-10,1.1e-10	1.11.1.7	Peroxidase.	Donor + H(2)O(2) = oxidized donor + 2 H(2)O.	Heme.	Flavonoids, stilbene and lignin biosynthesis	Biosynthesis of Secondary Metabolites	METABOLIC	0	0.30451
36853	36681	heme peroxidase			scaffold_121	-	59375	64802													5.494	2.178	5.758	0.915	0.954151	0.00561	2.5225	0.0604	0.378256	2976	peroxidase activity	IPR002007	Haem peroxidase, animal	FPrintScan	PR00457	ANPEROXIDASE	3	259,378,440,	274,404,450,	0.0001,0.0001,0.0001								0	0.17574
80438	80266	helicase			scaffold_313	+	9509	10231													------	------	------	NaN	#VALUE!	NaN	#VALUE!	NaN	#VALUE!
103738	103566	Heat Shock Protein			scaffold_35	-	51670	54228	12	1.1759	4	0.17681	11	0.23333	5	0.41095	0	0	0	0	545.816	431.581	573.007	0.947	0.952547	0.315	1.26469	0.691	0.753186	4591	protein folding	IPR001404	Heat shock protein Hsp90	FPrintScan	PR00775	HEATSHOCK90	7	4,25,74,92,117,169,187,	24,47,91,109,139,186,205,	3.1e-79,3.1e-79,3.1e-79,3.1e-79,3.1e-79,3.1e-79,3.1e-79								1.6309	2.7813
18779	18607	Heat Shock Protein			scaffold_28	-	94313	96720	11	0.91508	5	0.25703	6	0.14805	2	0.14251	1	0.14096	1	0.1295	529.448	295.93	739.998	0.605	0.715472	0.0704	1.7891	0.207	0.399906	3736	ATP binding	IPR013126	Heat shock protein 70	BlastProDom	PD000089	Q961X6_TRISP_Q961X6;	1	74,	166,	2e-24								4.1114	5.1272
131313	131141	Heat Shock Protein			scaffold_306	-	8243	10680	10	1.2135	1	0.049285	6	0.15707	2	0.15008	1	0.14827	0	0	240.681	194.389	173.761	0.454	1.38513	0.174	1.23814	0.8	1.11871	3736	ATP binding	IPR013126	Heat shock protein 70	BlastProDom	PD000089	Q961X6_TRISP_Q961X6;	1	76,	168,	2e-25								2.4485	4.8223
98718	98546	Heat Shock Protein	TMHs		scaffold_4	-	240773	243171	2	0.33835	3	0.35355	3	0.063347	3	0.28087	0	0	0	0	307.265	186.938	203.155	0.281	1.51247	0.0298	1.64367	0.827	0.920174	3736	ATP binding	IPR013126	Heat shock protein 70	BlastProDom	PD000089	Q961X6_TRISP_Q961X6;	1	119,	211,	2e-27								1.1627	1.9193
20372	20200	Heat Shock Protein			scaffold_171	-	6259	7688	2	0.734	1	0.11123	2	0.17562	1	0.16532	3	3.9691	3	3.0081	364.778	142.49	1181.89	0.0923	0.30864	0.0936	2.56003	0.0466	0.120561	3547	ion channel activity	IPR001425	Rhodopsin, bacterial	FPrintScan	PR00251	BACTRLOPSIN	6	53,95,123,147,188,219,	73,116,142,168,206,237,	7.8e-16,7.8e-16,7.8e-16,7.8e-16,7.8e-16,7.8e-16
108846	108674	Heat Shock Protein			scaffold_116	-	58527	59119													13565.4	16356.5	896.219	0.139	15.1363	0.638	0.829361	0.105	18.2506	5053	response to stress	IPR007250	Heat shock protein 9/12	HMMPfam	PF04119	HSP9_HSP12	1	1,	59,	1.4e-16								6.4367	38.585
30976	30804	Halogenase (possible)	FAD/NADP binding		scaffold_99	+	83108	85239													13.29	5.267	3.664	0.0321	3.62718	0.00239	2.52326	0.333	1.4375	5830	metabolic process	IPR003042	Aromatic-ring hydroxylase	FPrintScan	PR00420	RNGMNOXGNASE	3	11,157,307,	33,172,322,	1.3e-07,1.3e-07,1.3e-07
535016	534844	Halogenase		replaces protein 64075	scaffold_10		308153	310750													10.175	9.379	3.721	0.0285	2.73448	0.577	1.08487	0.0344	2.52056	2888	monooxygenase activity	IPR002938	Monooxygenase, FAD-binding	HMMPfam	PF01494	FAD_binding_3	1	1,	30,	9.9e-09
130314	130142	GTPase activating protein			scaffold_179	-	16580	20612													32.182	33.58	19.053	0.0755	1.68908	0.8	0.958368	0.0568	1.76245	3433	Rab GTPase activator activity	IPR002048	Calcium-binding EF-hand	BlastProDom	PD000012	CSEN_RAT_Q9JM47;	1	674,	703,	0.006
127964	127792	GTPase activating protein			scaffold_64	+	119195	121259													16.523	19.283	15.278	0.695	1.08149	0.223	0.856869	0.3	1.26214	3433	Rab GTPase activator activity	IPR000195	RabGAP/TBC	HMMSmart	SM00164	no description	1	32,	255,	0.00052
98412	98240	GTP-binding protein			scaffold_3	+	205875	206977	3	0.76626	2	0.3378	3	0.18334	1	0.23296	0	0	0	0	180.33	143.442	200.975	0.733	0.897276	0.147	1.25716	0.317	0.713731	3737	GTP binding	IPR006689	ARF/SAR superfamily	FPrintScan	PR00328	SAR1GTPBP	5	22,50,77,122,163,	45,74,102,143,187,	2.4e-68,2.4e-68,2.4e-68,2.4e-68,2.4e-68								1.0563	1.3752
105240	105068	GTP-binding protein			scaffold_51	+	35364	36536													368.472	321.807	272.768	0.225	1.35086	0.327	1.14501	0.508	1.17978	3737	GTP binding	IPR001806	Ras GTPase	FPrintScan	PR00449	RASTRNSFRMNG	5	6,29,46,110,158,	27,45,68,123,180,	6.9e-34,6.9e-34,6.9e-34,6.9e-34,6.9e-34								1.0277	1.3356
29860	29688	GTP-binding nuclear protein			scaffold_47	-	23553	24870													359.713	377.243	515.843	0.317	0.69733	0.748	0.953531	0.396	0.731314	3737	GTP binding	IPR001806	Ras GTPase	FPrintScan	PR00449	RASTRNSFRMNG	5	10,33,51,112,145,	31,49,73,125,167,	4.7e-31,4.7e-31,4.7e-31,4.7e-31,4.7e-31								1.7787	0.89409
27280	27108	GTP binding protein			scaffold_1	+	86552	88404													47.724	55.35	28.098	0.0593	1.69848	0.325	0.862222	0.0452	1.96989	3737	GTP binding	IPR006073	GTP1/OBG	FPrintScan	PR00326	GTP1OBG	4	66,87,114,131,	86,105,129,149,	1.2e-27,1.2e-27,1.2e-27,1.2e-27
25157	24985	GT90			scaffold_101	+	12483	14500													79.725	85.484	105.542	0.36	0.755386	0.567	0.932631	0.491	0.809952			IPR006598	Lipopolysaccharide-modifying protein	HMMSmart	SM00672	no description	1	217,	521,	6.8e-70
161254	161082	GT8			scaffold_110	-	37820	39522													7.457	12.118	7.718	0.889	0.966183	0.046	0.615366	0.109	1.5701	9350	carbohydrate biosynthetic process	IPR002495	Glycosyl transferase, family 8	HMMPfam	PF01501	Glyco_transf_8	1	89,	309,	7.9e-09	2.4.1.186	Glycogenin glucosyltransferase.	UDP-glucose + glycogenin = UDP + glucosylglycogenin.	\N	\N	\N	\N
29012	28840	GT8			scaffold_25	-	23497	24690													21.161	10.352	3.495	0.00219	6.05465	0.012	2.04415	0.0248	2.96195	9350	carbohydrate biosynthetic process	IPR002495	Glycosyl transferase, family 8	HMMPfam	PF01501	Glyco_transf_8	1	91,	313,	1.6e-07
400691	400519	GT8			scaffold_5	-	340600	345191													29.956	24.91	44.609	0.154	0.671524	0.279	1.20257	0.0703	0.558407	9350	carbohydrate biosynthetic process	IPR002495	Glycosyl transferase, family 8	HMMPfam	PF01501	Glyco_transf_8	1	7,	230,	8.9e-34
485271	485099	GT8			scaffold_96	-	79463	81640													2.119	1.798	2.944	0.253	0.719769	0.554	1.17853	0.168	0.610734	9350	carbohydrate biosynthetic process	IPR002495	Glycosyl transferase, family 8	HMMPfam	PF01501	Glyco_transf_8	1	223,	471,	4e-30
82082	81910	GT8			scaffold_2	+	479559	480022													65.353	83.423	55.101	0.5	1.18606	0.199	0.783393	0.142	1.514	9350	carbohydrate biosynthetic process	IPR002495	Glycosyl transferase, family 8	HMMPfam	PF01501	Glyco_transf_8	1	7,	116,	9.9e-12
505400	505228	GT8			scaffold_308	+	16007	17569													4.062	4.995	2.162	0.149	1.87882	0.256	0.813213	0.0801	2.31036
53851	53679	GT76 Glycosyl transferase	TMHs		scaffold_45	-	111611	112928													13.258	17.267	9.118	0.213	1.45405	0.262	0.767823	0.0597	1.89373			IPR007315	Mannosyltransferase, PIG-V	HMMPfam	PF04188	Mannosyl_trans2	1	2,	406,	6.2e-23
25928	25756	GT69			scaffold_147	+	32239	33894													23.636	19.45	22.167	0.77	1.06627	0.32	1.21522	0.619	0.87743
111247	111075	GT69			scaffold_187	+	21010	23187													76.511	69.921	50.915	0.19	1.50272	0.589	1.09425	0.297	1.37329
130095	129923	GT66			scaffold_162	-	48122	51059													64.891	63.944	81.768	0.327	0.793599	0.93	1.01481	0.302	0.782017	2953	oligosaccharyl transferase activity	IPR003674	Oligosaccharyl transferase, STT3 subunit	HMMPfam	PF02516	STT3	1	23,	690,	2.1e-225	2.4.1.119	Dolichyl-diphosphooligosaccharide--protein glycosyltransferase.	Dolichyl diphosphooligosaccharide + protein L-asparagine = dolichyl diphosphate + a glycoprotein with the oligosaccharide chain attached by glycosylamine linkage to protein L-asparagine.	\N	N-Glycans biosynthesis	Metabolism of Complex Carbohydrates	METABOLIC
90443	90271	GT59			scaffold_70	-	92568	94394													37.586	31.448	19.442	0.108	1.93324	0.177	1.19518	0.192	1.61753	24	alpha-1,6-mannosyltransferase activity	IPR007006	DIE2/ALG10	HMMPfam	PF04922	DIE2_ALG10	1	15,	405,	7.7e-90	2.4.1.-	Hexosyltransferases.	\N	\N	O-Glycans biosynthesis	Metabolism of Complex Carbohydrates	METABOLIC
104936	104764	GT58			scaffold_47	-	122375	123965													29.06	47.957	19.528	0.111	1.48812	0.0469	0.60596	0.0344	2.45581	45	mannosyltransferase activity	IPR007873	ALG3	HMMPfam	PF05208	ALG3	1	34,	393,	2.2e-143	2.4.1.130	Dolichyl-phosphate-mannose-glycolipid alpha-mannosyltransferase.	Transfers an alpha-D-mannosyl residue from dolichyl-phosphate D-mannose into membrane lipid-linked oligosaccharide.	\N	N-Glycans biosynthesis	Metabolism of Complex Carbohydrates	METABOLIC
61497	61325	GT57			scaffold_1	+	92703	95007													23.446	26.912	12.597	0.0479	1.86124	0.338	0.87121	0.0306	2.13638	3200	ubiquitin-protein ligase activity	IPR004856	ALG6, ALG8 glycosyltransferase	HMMPfam	PF03155	Alg6_Alg8	1	64,	557,	4.6e-173	2.4.1.-	Hexosyltransferases.	\N	\N	O-Glycans biosynthesis	Metabolism of Complex Carbohydrates	METABOLIC
104960	104788	GT57			scaffold_48	+	469	2734													38.214	51.583	26.996	0.135	1.41554	0.0669	0.740825	0.0413	1.91076	24	alpha-1,6-mannosyltransferase activity	IPR004856	ALG6, ALG8 glycosyltransferase	HMMPfam	PF03155	Alg6_Alg8	1	16,	485,	1.2e-147	2.4.1.-	Hexosyltransferases.	\N	\N	O-Glycans biosynthesis	Metabolism of Complex Carbohydrates	METABOLIC
98415	98243	GT50			scaffold_3	+	207097	208642													42.747	17.091	16.896	0.185	2.53001	0.00291	2.50114	0.986	1.01154	24	alpha-1,6-mannosyltransferase activity	IPR007704	Mannosyltransferase, DXD	HMMPfam	PF05007	Mannosyl_trans	1	186,	454,	2.6e-83	2.4.1.-	Hexosyltransferases.	\N	\N	O-Glycans biosynthesis	Metabolism of Complex Carbohydrates	METABOLIC
72413	72241	GT49			scaffold_74	+	65158	66616													5.44	10.072	5.511	0.982	0.987117	0.0872	0.540111	0.282	1.82762	6183	N-acetyllactosaminide beta-1,3-N-acetylglucosaminyltransferase activity										2.4.1.149	N-acetyllactosaminide beta-1,3-N-acetylglucosaminyltransferase.	UDP-N-acetyl-D-glucosamine + beta-D-galactosyl-1,4-N-acetyl-D- glucosaminyl-R = UDP + N-acetyl-beta-D-glucosaminyl-1,3-beta-D- galactosyl-1,4-N-acetyl-D-glucosaminyl-R.	\N	Blood group glycolipid biosynthesis - neolact series	Metabolism of Complex Lipids	METABOLIC
70028	69856	GT48			scaffold_47	+	851	6335													123.22	115.522	76.44	0.134	1.61198	0.794	1.06664	0.215	1.51128	147	1,3-beta-glucan synthase complex	IPR003440	Glycosyl transferase, family 48	HMMPfam	PF02364	Glucan_synthase	1	653,	1470,	0	2.4.1.34	1,3-beta-glucan synthase.	UDP-glucose + {(1,3)-beta-D-glucosyl}(N) = UDP + {(1,3)-beta-D- glucosyl}(N+1).	\N	Starch and sucrose metabolism	Metabolism of Complex Carbohydrates	METABOLIC
93172	93000	GT48			scaffold_124	+	72398	78741													116.965	147.014	80.603	0.139	1.45112	0.0945	0.795605	0.054	1.82393	147	1,3-beta-glucan synthase complex	IPR003440	Glycosyl transferase, family 48	HMMPfam	PF02364	Glucan_synthase	1	760,	1578,	0	2.4.1.34	1,3-beta-glucan synthase.	UDP-glucose + {(1,3)-beta-D-glucosyl}(N) = UDP + {(1,3)-beta-D- glucosyl}(N+1).	\N	Starch and sucrose metabolism	Metabolism of Complex Carbohydrates	METABOLIC
93222	93050	GT4			scaffold_125	+	72830	75673													70.998	67.204	307.501	0.118	0.230887	0.839	1.05645	0.0944	0.218549	6667	biosynthetic process	IPR001296	Glycosyl transferase, group 1	HMMPfam	PF00534	Glycos_transf_1	1	583,	669,	8e-18								0.31838	0.31838
130346	130174	GT4			scaffold_181	-	31418	33449													22.413	31.681	19.065	0.434	1.17561	0.0384	0.707459	0.063	1.66174	6667	biosynthetic process	IPR001296	Glycosyl transferase, group 1	HMMPfam	PF00534	Glycos_transf_1	1	185,	313,	4.3e-27	2.4.1.198	Phosphatidylinositol N-acetylglucosaminyltransferase.	UDP-N-acetyl-D-glucosamine + phosphatidylinositol = UDP + N-acetyl-D- glucosaminylphosphatidylinositol.	\N	Glycosylphosphatidylinositol(GPI)-anchor biosynthesis	\N	\N
512034	511862	GT4			scaffold_59	-	47817	49698													26.827	45.819	11.249	0.107	2.38483	0.148	0.585499	0.0402	4.07316	6667	biosynthetic process	IPR001296	Glycosyl transferase, group 1	HMMPfam	PF00534	Glycos_transf_1	1	217,	427,	1.4e-18	2.4.1.132	Glycolipid 3-alpha-mannosyltransferase.	Transfers an alpha-D-mannosyl residue from GDP-mannose into lipid-linked oligosaccharide, forming an alpha-1,3-D-mannosyl-D-mannose linkage.	\N	N-Glycans biosynthesis	Metabolism of Complex Carbohydrates	METABOLIC
74805	74633	GT4			scaffold_113	-	71612	73212													20.879	27.87	7.984	0.107	2.61511	0.292	0.749157	0.0594	3.49073	6667	biosynthetic process	IPR001296	Glycosyl transferase, group 1	HMMPfam	PF00534	Glycos_transf_1	1	238,	421,	1.2e-23	2.4.1.-	Hexosyltransferases.	\N	\N	O-Glycans biosynthesis	Metabolism of Complex Carbohydrates	METABOLIC
126902	126730	GT39			scaffold_36	+	122478	125735													111.477	84.88	54.923	0.0454	2.0297	0.0674	1.31335	0.118	1.54544	45	mannosyltransferase activity	IPR003342	Glycosyl transferase, family 39	HMMPfam	PF02366	PMT	1	135,	379,	9.1e-87	2.4.1.109	Dolichyl-phosphate-mannose--protein mannosyltransferase.	Dolichyl phosphate D-mannose + protein = dolichyl phosphate + O-D-mannosyl-protein.	\N	\N	\N	\N
34977	34805	GT39			scaffold_37	+	175473	178474													49.451	44.306	35.551	0.214	1.39099	0.592	1.11612	0.377	1.24627	45	mannosyltransferase activity	IPR003342	Glycosyl transferase, family 39	HMMPfam	PF02366	PMT	1	64,	311,	8.7e-92	2.4.1.109	Dolichyl-phosphate-mannose--protein mannosyltransferase.	Dolichyl phosphate D-mannose + protein = dolichyl phosphate + O-D-mannosyl-protein.	\N	\N	\N	\N
61334	61162	GT39			scaffold_1	-	349790	352520													63.303	64.29	44.623	0.206	1.41862	0.945	0.984648	0.163	1.44074	45	mannosyltransferase activity	IPR003342	Glycosyl transferase, family 39	HMMPfam	PF02366	PMT	1	69,	314,	1.9e-91	2.4.1.109	Dolichyl-phosphate-mannose--protein mannosyltransferase.	Dolichyl phosphate D-mannose + protein = dolichyl phosphate + O-D-mannosyl-protein.	\N	\N	\N	\N
119052	118880	GT35			scaffold_78	-	93430	97210													160.969	132.567	55.523	0.0185	2.89914	0.22	1.21425	0.0263	2.38761	3019	phosphorylase activity	IPR000811	Glycosyl transferase, family 35	HMMPfam	PF00343	Phosphorylase	1	143,	863,	0	2.4.1.1	Phosphorylase.	{(1,4)-alpha-D-glucosyl}(N) + phosphate = {(1,4)-alpha-D-glucosyl}(N-1) + alpha-D-glucose 1-phosphate.	\N	Starch and sucrose metabolism	Metabolism of Complex Carbohydrates	METABOLIC	0.21602	0.85771
129941	129769	GT33			scaffold_151	+	49014	51102													20.534	29.57	14.927	0.186	1.37563	0.12	0.69442	0.0708	1.98097	6667	biosynthetic process	IPR001296	Glycosyl transferase, group 1	HMMPfam	PF00534	Glycos_transf_1	1	387,	482,	3.4e-06	2.4.1.142	Chitobiosyldiphosphodolichol alpha-mannosyltransferase.	GDP-mannose + chitobiosyldiphosphodolichol = GDP + alpha-D-mannosylchitobiosyldiphosphodolichol.	\N	N-Glycans biosynthesis	Metabolism of Complex Carbohydrates	METABOLIC
124123	123951	GT32			scaffold_1	+	608827	610542													372.339	516.034	172.46	0.0809	2.15899	0.524	0.72154	0.105	2.9922			IPR007577	Glycosyltransferase sugar-binding region containing DXD motif	HMMPfam	PF04488	Gly_transf_sug	1	96,	178,	9.1e-28
110233	110061	GT32	TMHs		scaffold_150	-	53733	56513													33.583	31.939	22.08	0.149	1.52097	0.83	1.05147	0.199	1.44651
26035	25863	GT31			scaffold_155	+	36313	38475													142.771	150.793	215.165	0.18	0.663542	0.682	0.946801	0.225	0.700825
131109	130937	GT3			scaffold_269	-	10184	12937													112.035	133.466	56.179	0.0437	1.99425	0.328	0.839427	0.0339	2.37573	2628	aspartic-type endopeptidase activity	IPR008631	Glycogen synthase	HMMPfam	PF05693	Glycogen_syn	1	17,	665,	0	2.4.1.11	Glycogen (starch) synthase.	UDP-glucose + {(1,4)-alpha-D-glucosyl}(N) = UDP + {(1,4)-alpha-D- glucosyl}(N+1).	\N	Starch and sucrose metabolism	Metabolism of Complex Carbohydrates	METABOLIC	0	0.25829
79900	79728	GT24			scaffold_275	+	13126	19348													35.863	40.015	19.738	0.0878	1.81695	0.485	0.896239	0.0639	2.02731	2430	UDP-glucose:glycoprotein glucosyltransferase activity	IPR009448	UDP-glucose:Glycoprotein Glucosyltransferase	HMMPfam	PF06427	UDP-g_GGTase	1	897,	1120,	4.7e-50	2.4.1.-	Hexosyltransferases.	\N	\N	O-Glycans biosynthesis	Metabolism of Complex Carbohydrates	METABOLIC
436934	436762	GT22			scaffold_7	+	48868	51051													13.429	18.166	7.328	0.137	1.83256	0.109	0.739238	0.0477	2.47898	2960	dolichyl-phosphate-mannose-glycolipid alpha-mannosyltransferase activity	IPR005599	Alg9-like mannosyltransferase	HMMPfam	PF03901	Glyco_transf_22	1	7,	427,	2.8e-11	2.4.1.130	Dolichyl-phosphate-mannose-glycolipid alpha-mannosyltransferase.	Transfers an alpha-D-mannosyl residue from dolichyl-phosphate D-mannose into membrane lipid-linked oligosaccharide.	\N	N-Glycans biosynthesis	Metabolism of Complex Carbohydrates	METABOLIC
115890	115718	GT22			scaffold_21	+	39294	41714													13.861	10.798	9.277	0.351	1.49413	0.323	1.28366	0.732	1.16395	24	alpha-1,6-mannosyltransferase activity	IPR005599	Alg9-like mannosyltransferase	HMMPfam	PF03901	Glyco_transf_22	1	55,	541,	5.6e-94	2.4.1.-	Hexosyltransferases.	\N	\N	O-Glycans biosynthesis	Metabolism of Complex Carbohydrates	METABOLIC
328193	328021	GT22			scaffold_3	-	87495	89624													7.506	8.645	7.855	0.907	0.95557	0.347	0.868248	0.8	1.10057	24	alpha-1,6-mannosyltransferase activity	IPR005599	Alg9-like mannosyltransferase	HMMPfam	PF03901	Glyco_transf_22	1	4,	414,	5.1e-93	2.4.1.-	Hexosyltransferases.	\N	\N	O-Glycans biosynthesis	Metabolism of Complex Carbohydrates	METABOLIC
99011	98839	GT21			scaffold_5	-	285595	287092													38.294	32.514	63.208	0.0672	0.605841	0.243	1.17777	0.0405	0.514397	5802	ceramide glucosyltransferase activity										2.4.1.80	Ceramide glucosyltransferase.	UDP-glucose + N-acylsphingosine = UDP + D-glucosyl-N-acylsphingosine.	\N	Sphingoglycolipid metabolism	Metabolism of Complex Lipids	METABOLIC
28271	28099	GT20			scaffold_11	+	239614	241752													126.772	148.78	54.111	0.0525	2.34281	0.516	0.852077	0.0509	2.74953	2290	catalytic activity	IPR001830	Glycosyl transferase, family 20	HMMPfam	PF00982	Glyco_transf_20	1	1,	463,	8.2e-245	2.4.1.15	Alpha,alpha-trehalose-phosphate synthase (UDP-forming).	UDP-glucose + D-glucose 6-phosphate = UDP + alpha,alpha-trehalose 6-phosphate.	\N	Starch and sucrose metabolism	Metabolism of Complex Carbohydrates	METABOLIC	0.2424	0.31168
130855	130683	GT20			scaffold_230	+	25839	29534													44.63	26.844	17.964	0.037	2.48441	0.018	1.66257	0.185	1.49432	2290	catalytic activity	IPR001830	Glycosyl transferase, family 20	HMMPfam	PF00982	Glyco_transf_20	1	210,	605,	9.1e-185								0	0.28182
118743	118571	GT20			scaffold_71	+	40698	44011													46.228	47.527	18.137	0.0235	2.54882	0.856	0.972668	0.0231	2.62044	2290	catalytic activity	IPR001830	Glycosyl transferase, family 20	HMMPfam	PF00982	Glyco_transf_20	1	176,	618,	1.2e-178	2.4.1.15	Alpha,alpha-trehalose-phosphate synthase (UDP-forming).	UDP-glucose + D-glucose 6-phosphate = UDP + alpha,alpha-trehalose 6-phosphate.	\N	Starch and sucrose metabolism	Metabolism of Complex Carbohydrates	METABOLIC
26469	26297	GT2			scaffold_198	+	31351	37713													119.419	140.025	61.672	0.0491	1.93636	0.23	0.852841	0.0293	2.27048	12251	heme binding	IPR001609	Myosin head, motor region	BlastProDom	PD000355	Q9C846_ARATH_Q9C846;	1	144,	171,	0.005	2.4.1.16	Chitin synthase.	UDP-N-acetyl-D-glucosamine + {(1,4)-(N-acetyl-beta-D-glucosaminyl)}(N) = UDP + {(1,4)-(N-acetyl-beta-D-glucosaminyl)}(N+1).	\N	Aminosugars metabolism	Metabolism of Complex Carbohydrates	METABOLIC
116083	115911	GT2			scaffold_23	-	79829	86005													133.314	177.158	90.767	0.127	1.46875	0.0683	0.752515	0.0416	1.95179	12251	heme binding	IPR001609	Myosin head, motor region	FPrintScan	PR00193	MYOSINHEAVY	5	50,112,160,398,453,	69,137,187,426,481,	3.9e-21,3.9e-21,3.9e-21,3.9e-21,3.9e-21	2.4.1.16	Chitin synthase.	UDP-N-acetyl-D-glucosamine + {(1,4)-(N-acetyl-beta-D-glucosaminyl)}(N) = UDP + {(1,4)-(N-acetyl-beta-D-glucosaminyl)}(N+1).	\N	Aminosugars metabolism	Metabolism of Complex Carbohydrates	METABOLIC
69811	69639	GT2			scaffold_45	+	115116	118614													118.899	100.206	62.232	0.0516	1.91058	0.423	1.18655	0.125	1.6102	12251	heme binding	IPR001199	Cytochrome b5	HMMPfam	PF00173	Cyt-b5	1	235,	319,	6.9e-07	2.4.1.16	Chitin synthase.	UDP-N-acetyl-D-glucosamine + {(1,4)-(N-acetyl-beta-D-glucosaminyl)}(N) = UDP + {(1,4)-(N-acetyl-beta-D-glucosaminyl)}(N+1).	\N	Aminosugars metabolism	Metabolism of Complex Carbohydrates	METABOLIC
110127	109955	GT2			scaffold_147	-	21992	26717													75.178	77.818	54.571	0.2	1.37762	0.823	0.966075	0.172	1.426	12251	heme binding	IPR001199	Cytochrome b5	HMMPfam	PF00173	Cyt-b5	1	391,	472,	3.9e-08	2.4.1.16	Chitin synthase.	UDP-N-acetyl-D-glucosamine + {(1,4)-(N-acetyl-beta-D-glucosaminyl)}(N) = UDP + {(1,4)-(N-acetyl-beta-D-glucosaminyl)}(N+1).	\N	Aminosugars metabolism	Metabolism of Complex Carbohydrates	METABOLIC
113204	113032	GT2			scaffold_346	-	10539	11867													74.885	58.126	38.456	0.069	1.94729	0.0833	1.28832	0.169	1.51149	4513	rRNA processing	IPR001173	Glycosyl transferase, family 2	HMMPfam	PF00535	Glycos_transf_2	1	67,	179,	3.5e-25	2.4.1.117	Dolichyl-phosphate beta-glucosyltransferase.	UDP-glucose + dolichyl phosphate = UDP + dolichyl beta-D-glucosyl phosphate.	\N	N-Glycans biosynthesis	Metabolism of Complex Carbohydrates	METABOLIC
86955	86783	GT2			scaffold_30	+	43956	45031													191.346	200.668	144.288	0.189	1.32614	0.684	0.953545	0.157	1.39075	2958	dolichyl-phosphate beta-D-mannosyltransferase activity	IPR001173	Glycosyl transferase, family 2	HMMPfam	PF00535	Glycos_transf_2	1	10,	179,	1.2e-28	2.4.1.83	Dolichyl-phosphate beta-D-mannosyltransferase.	GDP-mannose + dolichyl phosphate = GDP + dolichyl D-mannosyl phosphate.	\N	N-Glycans biosynthesis	Metabolism of Complex Carbohydrates	METABOLIC
83371	83199	GT2			scaffold_8	+	133606	136741													6.254	5.546	5.003	0.655	1.25005	0.542	1.12766	0.834	1.10853	2540	chitin synthase activity	IPR004834	Chitin synthase	BlastProDom	PD002998	CHS1_RHIRA_Q12632;	1	79,	187,	4e-33	2.4.1.16	Chitin synthase.	UDP-N-acetyl-D-glucosamine + {(1,4)-(N-acetyl-beta-D-glucosaminyl)}(N) = UDP + {(1,4)-(N-acetyl-beta-D-glucosaminyl)}(N+1).	\N	Aminosugars metabolism	Metabolism of Complex Carbohydrates	METABOLIC
127629	127457	GT2			scaffold_55	+	14113	17822													74.3	69.583	73.638	0.978	1.00899	0.76	1.06779	0.832	0.944933	2540	chitin synthase activity	IPR004834	Chitin synthase	BlastProDom	PD002998	Q9P4U1_AGABI_Q9P4U1;	1	196,	303,	1e-52	2.4.1.16	Chitin synthase.	UDP-N-acetyl-D-glucosamine + {(1,4)-(N-acetyl-beta-D-glucosaminyl)}(N) = UDP + {(1,4)-(N-acetyl-beta-D-glucosaminyl)}(N+1).	\N	Aminosugars metabolism	Metabolism of Complex Carbohydrates	METABOLIC
63511	63339	GT2			scaffold_7	+	236360	240058													143.654	138.488	87.234	0.13	1.64677	0.864	1.0373	0.179	1.58755	2540	chitin synthase activity	IPR004834	Chitin synthase	BlastProDom	PD002998	CHS1_RHIOL_P30594;	1	205,	297,	2e-33	2.4.1.16	Chitin synthase.	UDP-N-acetyl-D-glucosamine + {(1,4)-(N-acetyl-beta-D-glucosaminyl)}(N) = UDP + {(1,4)-(N-acetyl-beta-D-glucosaminyl)}(N+1).	\N	Aminosugars metabolism	Metabolism of Complex Carbohydrates	METABOLIC
70414	70242	GT2			scaffold_51	-	69869	73131													95.964	123.071	54.601	0.0809	1.75755	0.0789	0.779745	0.037	2.25401	2540	chitin synthase activity	IPR004834	Chitin synthase	BlastProDom	PD002998	CHS2_RHIOL_P30595;	1	107,	199,	7e-39	2.4.1.16	Chitin synthase.	UDP-N-acetyl-D-glucosamine + {(1,4)-(N-acetyl-beta-D-glucosaminyl)}(N) = UDP + {(1,4)-(N-acetyl-beta-D-glucosaminyl)}(N+1).	\N	Aminosugars metabolism	Metabolism of Complex Carbohydrates	METABOLIC
73818	73646	GT2			scaffold_96	+	81938	85037													6.022	2.931	6.14	0.934	0.980782	0.0498	2.05459	0.0897	0.477362	2290	catalytic activity	IPR001173	Glycosyl transferase, family 2	HMMPfam	PF00535	Glycos_transf_2	1	530,	698,	2.6e-14
109516	109344	GT2			scaffold_131	+	41523	43618													234.58	250.795	225.524	0.887	1.04016	0.567	0.935346	0.695	1.11205			IPR001173	Glycosyl transferase, family 2	HMMPfam	PF00535	Glycos_transf_2	1	93,	220,	9.7e-08
128371	128199	GT17			scaffold_78	+	19598	21186													79.761	115.717	61.309	0.299	1.30097	0.092	0.689276	0.0575	1.88744	2296	beta-1,4-mannosylglycoprotein 4-beta-N-acetylglucosaminyltransferase activity	IPR006813	Glycosyl transferase, family 17	HMMPfam	PF04724	Glyco_transf_17	1	1,	360,	6.3e-104
109437	109265	GT15			scaffold_130	+	1154	2957													83.869	78.401	37.128	0.0252	2.25892	0.636	1.06974	0.0325	2.11164	2783	glycolipid 2-alpha-mannosyltransferase activity	IPR002685	Glycosyl transferase, family 15	HMMPfam	PF01793	Glyco_transf_15	1	3,	349,	1.5e-182	2.4.1.131	Glycolipid 2-alpha-mannosyltransferase.	Transfers an alpha-D-mannosyl residue from GDP-mannose into lipid-linked oligosaccharide, forming an alpha-1,2-D-mannosyl-D-mannose linkage.	\N	N-Glycans biosynthesis	Metabolism of Complex Carbohydrates	METABOLIC
29138	28966	GT15			scaffold_27	-	139945	141963													105.062	116.573	125.319	0.487	0.838357	0.381	0.901255	0.794	0.93021	2783	glycolipid 2-alpha-mannosyltransferase activity	IPR002685	Glycosyl transferase, family 15	HMMPfam	PF01793	Glyco_transf_15	1	1,	345,	1.5e-185	2.4.1.131	Glycolipid 2-alpha-mannosyltransferase.	Transfers an alpha-D-mannosyl residue from GDP-mannose into lipid-linked oligosaccharide, forming an alpha-1,2-D-mannosyl-D-mannose linkage.	\N	N-Glycans biosynthesis	Metabolism of Complex Carbohydrates	METABOLIC
118305	118133	GT1			scaffold_61	-	368	2001													69.176	65.028	56.462	0.397	1.22518	0.62	1.06379	0.579	1.15171	5830	metabolic process	IPR002213	UDP-glucuronosyl/UDP-glucosyltransferase	HMMPfam	PF00201	UDPGT	1	375,	430,	6.1e-07
63789	63617	GT1			scaffold_8	+	206759	209774													4.985	5.797	8.019	0.21	0.621649	0.565	0.859928	0.23	0.722908	5830	metabolic process	IPR002213	UDP-glucuronosyl/UDP-glucosyltransferase	HMMPfam	PF00201	UDPGT	1	383,	439,	3.8e-15
67347	67175	GT1			scaffold_27	-	107758	108394													201.348	276.24	93.226	0.237	2.15978	0.0623	0.728888	0.118	2.96312	4143	carbohydrate metabolic process	IPR007235	Glycosyl transferase, family 28, C-terminal	HMMPfam	PF04101	Glyco_tran_28_C	1	2,	169,	3.7e-33	2.4.1.141	N-acetylglucosaminyldiphosphodolichol N-acetylglucosaminyltransferase.	UDP-N-acetyl-D-glucosamine + N-acetyl-D-glucosaminyl-diphosphodolichol = UDP + N,N''-diacetylchitobiosyldiphosphodolichol.	\N	N-Glycans biosynthesis	Metabolism of Complex Carbohydrates	METABOLIC
66199	66027	GT1			scaffold_20	+	47145	50937													49.386	46.205	12.212	0.0264	4.04406	0.735	1.06885	0.0318	3.78357	4143	carbohydrate metabolic process	IPR004276	Glycosyl transferase, family 28	HMMPfam	PF03033	Glyco_transf_28	1	525,	660,	2.4e-29	2.4.1.173	Sterol glucosyltransferase.	UDP-glucose + a sterol = UDP + an O-glucosylsterol.	\N	\N	\N	\N
72137	71965	GT1			scaffold_70	+	7834	11971													38.278	48.075	53.435	0.323	0.716347	0.146	0.796214	0.747	0.899691	4143	carbohydrate metabolic process	IPR001849	Pleckstrin-like	HMMPfam	PF00169	PH	1	66,	157,	1.2e-22	2.4.1.173	Sterol glucosyltransferase.	UDP-glucose + a sterol = UDP + an O-glucosylsterol.	\N	\N	\N	\N
127220	127048	GT1			scaffold_43	-	152210	153318													30.537	28.724	22.066	0.2	1.38389	0.693	1.06312	0.285	1.30173	2954	N-acetylglucosaminyldiphosphodolichol N-acetylglucosaminyltransferase activity	IPR013969	Oligosaccharide biosynthesis protein Alg14 like	HMMPfam	PF08660	Alg14	1	42,	225,	4e-67	2.4.1.141	N-acetylglucosaminyldiphosphodolichol N-acetylglucosaminyltransferase.	UDP-N-acetyl-D-glucosamine + N-acetyl-D-glucosaminyl-diphosphodolichol = UDP + N,N''-diacetylchitobiosyldiphosphodolichol.	\N	N-Glycans biosynthesis	Metabolism of Complex Carbohydrates	METABOLIC
111791	111619	GPI-anchored wall transfer protein	TMHs		scaffold_215	-	7831	9913													27.216	23.718	18.755	0.48	1.45113	0.478	1.14748	0.658	1.26462	3978	endoplasmic reticulum membrane	IPR009447	GWT1	HMMPfam	PF06423	GWT1	1	295,	483,	7.4e-22	2.3.-.-	Acyltransferases.	\N	\N	\N	\N	\N
104635	104463	GPI inositol-deacylase	SS/TMHs		scaffold_44	-	75162	78215													16.182	18.417	15.063	0.773	1.07429	0.464	0.878645	0.437	1.22266	2290	catalytic activity	IPR012908	PGAP1-like	HMMPfam	PF07819	PGAP1	1	80,	298,	6.1e-53
348274	348102	Golgi apparatus membrane protein	TMHs		scaffold_33	+	172015	174217	0	0	1	0.082336	2	0.057448	0	0	1	0.2477	1	0.22757	150.578	148.705	106.949	0.244	1.40794	0.959	1.0126	0.306	1.39043
123383	123211	GMC oxodoreductase		Possible GOX	scaffold_325	-	2573	5101													12.129	24.601	23.553	0.0575	0.514966	0.0098	0.493029	0.852	1.0445	9821	oxidoreductase activity, acting on CH-OH group of donors	IPR000172	Glucose-methanol-choline oxidoreductase, N-terminal	HMMPfam	PF00732	GMC_oxred_N	1	15,	341,	3.2e-59	1.1.99.1	Choline dehydrogenase.	Choline + acceptor = betaine aldehyde + reduced acceptor.	PQQ.	Glycine, serine and threonine metabolism	Amino Acid Metabolism	METABOLIC
128243	128071	GMC oxidoreductase	SS	Aryl Alcohol Oxidase (AAO)	scaffold_73	-	97210	99564	6	0.58953	3	0.16259	2	0.035425	9	3.4524	12	6.9879	13	5.973	9.264	13.046	9.39	0.97	0.986581	0.165	0.710103	0.291	1.38935	9821	oxidoreductase activity, acting on CH-OH group of donors	IPR000172	Glucose-methanol-choline oxidoreductase, N-terminal	HMMPfam	PF00732	GMC_oxred_N	1	38,	361,	2.6e-63	1.1.99.1	Choline dehydrogenase.	Choline + acceptor = betaine aldehyde + reduced acceptor.	PQQ.	Glycine, serine and threonine metabolism	Amino Acid Metabolism	METABOLIC	0.22006	2.1383
128280	128108	GMC oxidoreductase	SS	Glucose oxidase (GOX)	scaffold_75	+	248	2933	1	0.068935	3	0.21166	6	0.18088	1	0.073129	0	0	0	0	41.924	46.481	6.919	0.0253	6.05926	0.514	0.90196	0.0173	6.71788	9821	oxidoreductase activity, acting on CH-OH group of donors	IPR000172	Glucose-methanol-choline oxidoreductase, N-terminal	HMMPfam	PF00732	GMC_oxred_N	1	34,	388,	1.9e-42	1.1.99.1	Choline dehydrogenase.	Choline + acceptor = betaine aldehyde + reduced acceptor.	PQQ.	Glycine, serine and threonine metabolism	Amino Acid Metabolism	METABOLIC	1.1395	0.2683
121686	121514	GMC oxidoreductase	SS	Aryl Alcohol Oxidase (AAO)	scaffold_175	+	11175	13578	0	0	0	0	0	0	2	0.15485	0	0	0	0	18.026	21.065	35.084	0.0614	0.513795	0.411	0.855732	0.0965	0.600416	9821	oxidoreductase activity, acting on CH-OH group of donors	IPR000172	Glucose-methanol-choline oxidoreductase, N-terminal	HMMPfam	PF00732	GMC_oxred_N	1	33,	356,	1.2e-62	1.1.99.1	Choline dehydrogenase.	Choline + acceptor = betaine aldehyde + reduced acceptor.	PQQ.	Glycine, serine and threonine metabolism	Amino Acid Metabolism	METABOLIC
101298	101126	GMC oxidoreductase			scaffold_17	+	80525	83445													192.949	142.836	20.52	0.0871	9.40297	0.328	1.35084	0.111	6.96082	9821	oxidoreductase activity, acting on CH-OH group of donors	IPR000172	Glucose-methanol-choline oxidoreductase, N-terminal	HMMPfam	PF00732	GMC_oxred_N	1	72,	395,	8.6e-71	1.1.99.1	Choline dehydrogenase.	Choline + acceptor = betaine aldehyde + reduced acceptor.	PQQ.	Glycine, serine and threonine metabolism	Amino Acid Metabolism	METABOLIC	0.094717	0.64498
77628	77456	GMC oxidoreductase			scaffold_175	+	5463	5960													0.501	0.453	0.683	0.578	0.733529	0.879	1.10596	0.377	0.66325	9821	oxidoreductase activity, acting on CH-OH group of donors	IPR007867	Glucose-methanol-choline oxidoreductase, C-terminal	HMMPfam	PF05199	GMC_oxred_C	1	1,	135,	1.6e-16
236675	236503	GMC oxidoreductase		Glucose oxidase-like	scaffold_175	+	13817	16769													48.142	21.99	8.948	0.102	5.3802	0.0271	2.18927	0.279	2.45753	9821	oxidoreductase activity, acting on CH-OH group of donors	IPR000172	Glucose-methanol-choline oxidoreductase, N-terminal	HMMPfam	PF00732	GMC_oxred_N	1	14,	341,	2e-68	1.1.99.1	Choline dehydrogenase.	Choline + acceptor = betaine aldehyde + reduced acceptor.	PQQ.	Glycine, serine and threonine metabolism	Amino Acid Metabolism	METABOLIC
130966	130794	GMC oxidoreductase			scaffold_246	+	15511	18271													34.546	27.509	211.026	0.1	0.163705	0.177	1.25581	0.0657	0.130358	9821	oxidoreductase activity, acting on CH-OH group of donors	IPR000172	Glucose-methanol-choline oxidoreductase, N-terminal	HMMPfam	PF00732	GMC_oxred_N	1	51,	382,	1.2e-58	1.1.99.1	Choline dehydrogenase.	Choline + acceptor = betaine aldehyde + reduced acceptor.	PQQ.	Glycine, serine and threonine metabolism	Amino Acid Metabolism	METABOLIC
240771	240599	GMC oxidoreductase			scaffold_18	-	136375	140021													11.226	11.065	3.851	0.146	2.91509	0.937	1.01455	0.137	2.87328	9821	oxidoreductase activity, acting on CH-OH group of donors	IPR000172	Glucose-methanol-choline oxidoreductase, N-terminal	HMMPfam	PF00732	GMC_oxred_N	1	13,	339,	1.6e-54	1.1.99.1	Choline dehydrogenase.	Choline + acceptor = betaine aldehyde + reduced acceptor.	PQQ.	Glycine, serine and threonine metabolism	Amino Acid Metabolism	METABOLIC
240977	240805	GMC oxidoreductase			scaffold_18	-	140186	143473													2.176	2.473	2.53	0.649	0.860079	0.445	0.879903	0.951	0.97747	9821	oxidoreductase activity, acting on CH-OH group of donors	IPR000172	Glucose-methanol-choline oxidoreductase, N-terminal	HMMPfam	PF00732	GMC_oxred_N	1	13,	339,	1.3e-63	1.1.99.1	Choline dehydrogenase.	Choline + acceptor = betaine aldehyde + reduced acceptor.	PQQ.	Glycine, serine and threonine metabolism	Amino Acid Metabolism	METABOLIC
241013	240841	GMC oxidoreductase			scaffold_18	-	144493	147698													7.923	9.977	7.387	0.857	1.07256	0.165	0.794126	0.42	1.35062	9821	oxidoreductase activity, acting on CH-OH group of donors	IPR000172	Glucose-methanol-choline oxidoreductase, N-terminal	HMMPfam	PF00732	GMC_oxred_N	1	12,	336,	1.1e-57	1.1.99.1	Choline dehydrogenase.	Choline + acceptor = betaine aldehyde + reduced acceptor.	PQQ.	Glycine, serine and threonine metabolism	Amino Acid Metabolism	METABOLIC
128733	128561	GMC oxidoreductase			scaffold_92	-	58024	60680													20.944	26.817	10.665	0.0701	1.96381	0.0894	0.780997	0.0329	2.51449	9821	oxidoreductase activity, acting on CH-OH group of donors	IPR000172	Glucose-methanol-choline oxidoreductase, N-terminal	HMMPfam	PF00732	GMC_oxred_N	1	14,	340,	5.4e-59	1.1.99.1	Choline dehydrogenase.	Choline + acceptor = betaine aldehyde + reduced acceptor.	PQQ.	Glycine, serine and threonine metabolism	Amino Acid Metabolism	METABOLIC
11437	11265	GMC oxidoreductase			scaffold_17	+	118526	121591													39.513	52.384	12.759	0.104	3.09687	0.56	0.754295	0.0781	4.10565	9821	oxidoreductase activity, acting on CH-OH group of donors	IPR000172	Glucose-methanol-choline oxidoreductase, N-terminal	HMMPfam	PF00732	GMC_oxred_N	1	69,	393,	9.8e-68	1.1.99.1	Choline dehydrogenase.	Choline + acceptor = betaine aldehyde + reduced acceptor.	PQQ.	Glycine, serine and threonine metabolism	Amino Acid Metabolism	METABOLIC
103709	103537	GMC oxidoreductase			scaffold_35	-	13230	15747													33.558	47.225	37.14	0.866	0.903554	0.0706	0.710598	0.672	1.27154	9821	oxidoreductase activity, acting on CH-OH group of donors	IPR000172	Glucose-methanol-choline oxidoreductase, N-terminal	HMMPfam	PF00732	GMC_oxred_N	1	17,	341,	1.7e-73	1.1.99.1	Choline dehydrogenase.	Choline + acceptor = betaine aldehyde + reduced acceptor.	PQQ.	Glycine, serine and threonine metabolism	Amino Acid Metabolism	METABOLIC
11339	11167	GMC oxidoreductase			scaffold_15	+	227176	229234													6.584	9.376	6.244	0.816	1.05445	0.0526	0.702218	0.108	1.5016	9821	oxidoreductase activity, acting on CH-OH group of donors	IPR000172	Glucose-methanol-choline oxidoreductase, N-terminal	HMMPfam	PF00732	GMC_oxred_N	1	23,	348,	1.7e-56	1.1.99.1	Choline dehydrogenase.	Choline + acceptor = betaine aldehyde + reduced acceptor.	PQQ.	Glycine, serine and threonine metabolism	Amino Acid Metabolism	METABOLIC
30302	30130	GMC oxidoreductase			scaffold_65	-	31657	34137													6.268	8.986	3.574	0.162	1.75378	0.0257	0.697529	0.0557	2.51427	9821	oxidoreductase activity, acting on CH-OH group of donors	IPR000172	Glucose-methanol-choline oxidoreductase, N-terminal	HMMPfam	PF00732	GMC_oxred_N	1	18,	323,	1.8e-58	1.1.99.1	Choline dehydrogenase.	Choline + acceptor = betaine aldehyde + reduced acceptor.	PQQ.	Glycine, serine and threonine metabolism	Amino Acid Metabolism	METABOLIC
128222	128050	GMC oxidoreductase			scaffold_73	+	21649	24286													11.663	18.039	9.044	0.465	1.28958	0.0333	0.646544	0.0938	1.99458	9821	oxidoreductase activity, acting on CH-OH group of donors	IPR000172	Glucose-methanol-choline oxidoreductase, N-terminal	HMMPfam	PF00732	GMC_oxred_N	1	14,	341,	2.2e-68	1.1.99.1	Choline dehydrogenase.	Choline + acceptor = betaine aldehyde + reduced acceptor.	PQQ.	Glycine, serine and threonine metabolism	Amino Acid Metabolism	METABOLIC
101295	101123	GMC oxidoreductase			scaffold_17	-	74911	78145													8.511	14.243	5.913	0.152	1.43937	0.0178	0.597557	0.0216	2.40876	9821	oxidoreductase activity, acting on CH-OH group of donors	IPR000172	Glucose-methanol-choline oxidoreductase, N-terminal	HMMPfam	PF00732	GMC_oxred_N	1	70,	395,	8.8e-54	1.1.99.1	Choline dehydrogenase.	Choline + acceptor = betaine aldehyde + reduced acceptor.	PQQ.	Glycine, serine and threonine metabolism	Amino Acid Metabolism	METABOLIC
30392	30220	GMC oxidoreductase			scaffold_69	+	38059	40146													15.342	39.944	34.182	0.16	0.448833	0.213	0.384088	0.882	1.16857	9821	oxidoreductase activity, acting on CH-OH group of donors	IPR000172	Glucose-methanol-choline oxidoreductase, N-terminal	HMMPfam	PF00732	GMC_oxred_N	1	21,	326,	1.8e-50	1.1.99.1	Choline dehydrogenase.	Choline + acceptor = betaine aldehyde + reduced acceptor.	PQQ.	Glycine, serine and threonine metabolism	Amino Acid Metabolism	METABOLIC
128658	128486	glyoxylase			scaffold_88	-	98335	99203													194.936	249.454	92.176	0.0696	2.11482	0.405	0.781451	0.043	2.70628	2856	lactoylglutathione lyase activity	IPR004360	Glyoxalase/bleomycin resistance protein/dioxygenase	HMMPfam	PF00903	Glyoxalase	1	11,	153,	4.3e-36	4.4.1.5	Lactoylglutathione lyase.	(R)-S-lactoylglutathione = glutathione + methylglyoxal.	\N	Pyruvate metabolism	Carbohydrate Metabolism	METABOLIC
36392	36220	Glycoprotein	SS		scaffold_95	-	8316	11486	3	0.17481	2	0.1697	2	0.041825	2	0.12122	3	0.37536	2	0.22541	106.336	48.471	364.753	0.204	0.291529	0.00916	2.19381	0.0705	0.132887
17634	17462	glycoprotein			scaffold_524	-	57	1512													------	------	------	NaN	#VALUE!	NaN	#VALUE!	NaN	#VALUE!
125163	124991	Glycolate oxidase	Other	peroxisomal?	scaffold_10	+	289593	292046													73.653	81.315	33.505	0.0744	2.19827	0.642	0.905774	0.0469	2.42695	4283	electron transport	IPR001199	Cytochrome b5	BlastProDom	PD000612	Q7S8J5_NEUCR_Q7S8J5;	1	10,	79,	8e-25	1.1.2.3	L-lactate dehydrogenase (cytochrome).	(S)-lactate + 2 ferricytochrome c = pyruvate + 2 ferrocytochrome c.	FMN; Protoheme IX.	Pyruvate metabolism	Carbohydrate Metabolism	METABOLIC
28205	28033	Glycolate oxidase	Other	peroxisomal? Low expression	scaffold_10	-	283247	285411													6.878	9.574	4.907	0.293	1.40167	0.161	0.718404	0.103	1.95109	4283	electron transport	IPR001199	Cytochrome b5	BlastProDom	PD000612	Q7S8J5_NEUCR_Q7S8J5;	1	11,	80,	2e-23	1.1.2.3	L-lactate dehydrogenase (cytochrome).	(S)-lactate + 2 ferricytochrome c = pyruvate + 2 ferrocytochrome c.	FMN; Protoheme IX.	Pyruvate metabolism	Carbohydrate Metabolism	METABOLIC
116861	116689	Glycerol-3-phosphate O-acyltransferase	TMHs		scaffold_33	-	131701	134200													14.657	28.202	17.122	0.534	0.856033	0.0139	0.519715	0.117	1.64712	5830	metabolic process	IPR002123	Phospholipid/glycerol acyltransferase	HMMPfam	PF01553	Acyltransferase	1	24,	260,	6.6e-11
90720	90548	Glycerol-3-phosphate dehydrogenase			scaffold_75	+	11317	14306													164.731	132.441	41.6	0.0131	3.95988	0.329	1.24381	0.0279	3.18368	2774	glycerol-3-phosphate dehydrogenase activity	IPR000447	FAD-dependent glycerol-3-phosphate dehydrogenase	FPrintScan	PR01001	FADG3PDH	6	20,33,49,101,342,373,	32,43,61,113,348,385,	3.1e-32,3.1e-32,3.1e-32,3.1e-32,3.1e-32,3.1e-32	1.1.99.5	Glycerol-3-phosphate dehydrogenase.	Sn-glycerol 3-phosphate + acceptor = glycerone phosphate + reduced acceptor.	Flavin.	Glycerolipid metabolism	Metabolism of Complex Lipids	METABOLIC	0.8429	0.69864
99503	99331	Glycerol uptake facilitor	TMHs		scaffold_8	+	95247	96936	2	0.2549	2	0.18194	4	0.17366	2	0.27042	4	1.9554	3	1.0962	2531.84	1230.97	218.774	0.141	11.5728	0.0139	2.05677	0.24	5.62669	3546	transporter activity	IPR000425	Major intrinsic protein	BlastProDom	PD000295	Q6LVI7_PHOPR_Q6LVI7;	1	40,	257,	8e-15
106311	106139	Glycerol kinase			scaffold_67	+	75585	77638													558.21	286.988	307.805	0.0687	1.81352	0.00259	1.94506	0.788	0.93237	4143	carbohydrate metabolic process	IPR000577	Carbohydrate kinase, FGGY	HMMPfam	PF00370	FGGY_N	1	10,	277,	1.3e-80	2.7.1.30	Glycerol kinase.	ATP + glycerol = ADP + glycerol 3-phosphate.	\N	Glycerolipid metabolism	Metabolism of Complex Lipids	METABOLIC	1.1529	0.82665
126403	126231	Glycanase	SS/TMHs		scaffold_28	-	27276	29750													23.231	29.475	7.569	0.0494	3.06923	0.225	0.788159	0.0264	3.89417
76689	76517	Glutathione-S-transferase			scaffold_150	-	47622	48566													55.773	89.661	24.045	0.117	2.31953	0.22	0.622043	0.0596	3.72888	2770	glutathione transferase activity	IPR004045	Glutathione S-transferase, N-terminal	HMMPfam	PF02798	GST_N	1	27,	99,	4.2e-09	2.5.1.18	Glutathione transferase.	RX + glutathione = HX + R-S-glutathione.	\N	Glutathione metabolism	Metabolism of Other Amino Acids	METABOLIC
19603	19431	Glutathione-S-transferase			scaffold_80	+	25478	26991													122.295	155.122	59.504	0.0356	2.05524	0.128	0.788379	0.0222	2.60692			IPR004046	Glutathione S-transferase, C-terminal	HMMPfam	PF00043	GST_C	1	204,	249,	0.00095
125100	124928	Glutathione-dependent formaldehyde activating GFA			scaffold_10	+	99743	100271													29.275	62.188	92.623	0.0528	0.316066	0.0739	0.47075	0.458	0.67141	5830	metabolic process	IPR006913	Glutathione-dependent formaldehyde-activating, GFA	HMMPfam	PF04828	DUF636	1	35,	122,	2.3e-05
113237	113065	Glutathione S-transferase			scaffold_359	+	2711	3631	4	0.97155	4	0.69346	1	0.047269	0	0	0	0	0	0	51.82	14.435	44.571	0.569	1.16264	0.000245	3.58989	0.0234	0.323865	2770	glutathione transferase activity	IPR004046	Glutathione S-transferase, C-terminal	HMMPfam	PF00043	GST_C	1	110,	207,	6e-17	2.5.1.18	Glutathione transferase.	RX + glutathione = HX + R-S-glutathione.	\N	Glutathione metabolism	Metabolism of Other Amino Acids	METABOLIC
32093	31921	Glutathione S-transferase			scaffold_192	+	44288	45282	1	0.18769	1	0.13397	2	0.095767	1	0.19911	1	0.40302	0	0	234.705	263.766	122.552	0.324	1.91515	0.546	0.889823	0.256	2.15228	2770	glutathione transferase activity	IPR004046	Glutathione S-transferase, C-terminal	HMMPfam	PF00043	GST_C	1	115,	206,	4.6e-17	2.5.1.18	Glutathione transferase.	RX + glutathione = HX + R-S-glutathione.	\N	Glutathione metabolism	Metabolism of Other Amino Acids	METABOLIC
129245	129073	Glutathione S-transferase			scaffold_115	+	23629	24585													982.138	687.813	41.569	0.0404	23.6267	0.306	1.42791	0.0468	16.5463	2770	glutathione transferase activity	IPR004046	Glutathione S-transferase, C-terminal	HMMPfam	PF00043	GST_C	1	115,	205,	7.3e-12	2.5.1.18	Glutathione transferase.	RX + glutathione = HX + R-S-glutathione.	\N	Glutathione metabolism	Metabolism of Other Amino Acids	METABOLIC
116012	115840	Glutathione S-transferase			scaffold_22	-	117372	118256													8.617	20.422	12.029	0.258	0.716352	0.0158	0.421947	0.097	1.69773	2770	glutathione transferase activity	IPR004046	Glutathione S-transferase, C-terminal	HMMPfam	PF00043	GST_C	1	114,	205,	4.2e-17	2.5.1.18	Glutathione transferase.	RX + glutathione = HX + R-S-glutathione.	\N	Glutathione metabolism	Metabolism of Other Amino Acids	METABOLIC
89456	89284	Glutathione peroxidase			scaffold_56	+	61549	62476	3	1.9525	2	0.41875	2	0.23105	0	0	0	0	0	0	475.034	124.214	139.916	0.091	3.39514	0.0143	3.82432	0.869	0.887776	2977	glutathione peroxidase activity	IPR000889	Glutathione peroxidase	FPrintScan	PR01011	GLUTPROXDASE	3	22,57,123,	39,73,132,	2.1e-21,2.1e-21,2.1e-21	1.11.1.9	Glutathione peroxidase.	2 glutathione + H(2)O(2) = oxidized glutathione + 2 H(2)O.	Selenium.	Glutathione metabolism	Metabolism of Other Amino Acids	METABOLIC	4.6592	1.3789
100483	100311	Glutaredoxin			scaffold_12	-	129817	130746	2	0.38009	0	0	0	0	0	0	0	0	0	0	70.087	58.373	304.947	0.175	0.229833	0.449	1.20067	0.129	0.19142	6664	electron carrier activity	IPR006662	Thioredoxin-related	FPrintScan	PR00421	THIOREDOXIN	3	30,38,77,	38,47,88,	0.21,0.21,0.21								0.12625	1.0408
18052	17880	Glutaredoxin			scaffold_7	-	99912	100821													222.204	336.793	163.838	0.401	1.35624	0.129	0.659764	0.114	2.05565	6664	electron carrier activity	IPR014025	Glutaredoxin subgroup	FPrintScan	PR00160	GLUTAREDOXIN	3	16,63,77,	34,76,90,	5.2e-18,5.2e-18,5.2e-18
105971	105799	glutamyl-tRNA synthase			scaffold_62	+	32468	34927													24.659	20.233	18.491	0.214	1.33357	0.155	1.21875	0.685	1.09421	162	nucleotide binding	IPR000924	Glutamyl/glutaminyl-tRNA synthetase, class Ic	FPrintScan	PR00987	TRNASYNTHGLU	5	5,19,34,193,209,	17,30,47,203,217,	7.3e-26,7.3e-26,7.3e-26,7.3e-26,7.3e-26	6.1.1.17	Glutamate--tRNA ligase.	ATP + L-glutamate + tRNA(Glu) = AMP + diphosphate + L-glutamyl- tRNA(Glu).	\N	Glutamate metabolism	Amino Acid Metabolism	METABOLIC
84848	84676	Glutamine synthetase			scaffold_15	-	174330	175851													359.621	226.543	319.004	0.569	1.12732	0.0159	1.58743	0.148	0.710157	2762	glutamate-ammonia ligase activity	IPR008146	Glutamine synthetase, catalytic region	BlastProDom	PD001057	Q83HM2_TROW8_Q83HM2;	1	205,	338,	3e-07	6.3.1.2	Glutamate--ammonia ligase.	ATP + L-glutamate + NH(3) = ADP + phosphate + L-glutamine.	\N	Peptidoglycan biosynthesis	Metabolism of Complex Carbohydrates	METABOLIC	0.27652	0.76766
98380	98208	glutamine synthetase			scaffold_3	-	162025	164285													60.216	67.87	18.871	0.00846	3.19093	0.427	0.887226	0.00853	3.59652	2762	glutamate-ammonia ligase activity	IPR008146	Glutamine synthetase, catalytic region	BlastProDom	PD001057	Q7SG85_NEUCR_Q7SG85;	1	147,	462,	2e-76	6.3.1.2	Glutamate--ammonia ligase.	ATP + L-glutamate + NH(3) = ADP + phosphate + L-glutamine.	\N	Peptidoglycan biosynthesis	Metabolism of Complex Carbohydrates	METABOLIC
83530	83358	Glutamine amidotransferase			scaffold_9	+	18568	20374													59.552	75.669	48.346	0.334	1.23179	0.134	0.787007	0.0897	1.56516	5830	metabolic process	IPR000583	Glutamine amidotransferase, class-II	HMMPfam	PF00310	GATase_2	1	13,	218,	1.5e-05
27792	27620	Glutamic oxaloacetic transaminase			scaffold_5	+	183441	185229	1	0.099749	1	0.071197	3	0.07676	0	0	1	0.21419	0	0	127.315	120.908	317.431	0.396	0.401079	0.82	1.05299	0.355	0.380895	4650	amino acid metabolic process	IPR000796	Aspartate/other aminotransferase	FPrintScan	PR00799	TRANSAMINASE	6	199,230,266,298,366,392,	218,244,286,323,384,410,	1.8e-65,1.8e-65,1.8e-65,1.8e-65,1.8e-65,1.8e-65	2.6.1.1	Aspartate aminotransferase.	L-aspartate + 2-oxoglutarate = oxaloacetate + L-glutamate.	Pyridoxal-phosphate.	Alanine and aspartate metabolism	Amino Acid Metabolism	METABOLIC	0.72392	1.7763
86127	85955	Glucosidase II subunit beta	SS		scaffold_24	+	25470	27807													128.4	104.274	45.539	0.029	2.81956	0.293	1.23137	0.0412	2.28977	3727	protein binding	IPR012913	Glucosidase II beta subunit-like	HMMPfam	PF07915	PRKCSH	1	427,	488,	3.8e-13	3.2.1.20	Alpha-glucosidase.	Hydrolysis of terminal, non-reducing 1,4-linked D-glucose residues with release of D-glucose.	\N	Galactose metabolism	Carbohydrate Metabolism	METABOLIC
112089	111917	Glucosamine-6-phosphate isomerase			scaffold_228	+	13462	14629													38.438	17.516	13.077	0.18	2.93936	0.00695	2.19445	0.692	1.33945	2748	glucosamine-6-phosphate deaminase activity	IPR006148	Glucosamine/galactosamine-6-phosphate isomerase	HMMPfam	PF01182	Glucosamine_iso	1	15,	250,	5.1e-157	3.5.99.6	Glucosamine-6-phosphate deaminase.	D-glucosamine 6-phosphate + H(2)O = D-fructose 6-phosphate + NH(3).	\N	Aminosugars metabolism	Metabolism of Complex Carbohydrates	METABOLIC
99601	99429	GLP-iron reductase-like	SS		scaffold_8	-	226627	228204													441.161	463.846	157.474	0.124	2.80148	0.738	0.951094	0.101	2.94554			IPR001938	Thaumatin, pathogenesis-related	superfamily	SSF49870	Osmotin, thaumatin-like protein	1	27,	164,	0.0037
220252	220080	GLP-iron reductase-like	SS		scaffold_16	-	113824	115212													2.807	3.252	8.629	0.0541	0.325298	0.36	0.863161	0.0565	0.376869			IPR001938	Thaumatin, pathogenesis-related	superfamily	SSF49870	Osmotin, thaumatin-like protein	1	25,	159,	0.0081
219891	219719	GLP-iron reductase-like	SS		scaffold_16	-	90037	91217													5.264	14.717	110.55	0.104	0.0476165	0.271	0.357682	0.17	0.133125			IPR001938	Thaumatin, pathogenesis-related	superfamily	SSF49870	Osmotin, thaumatin-like protein	1	24,	158,	2e-05
219871	219699	GLP-iron reductase-like	SS	truncated 3'	scaffold_16	-	87467	88467													0.461	0.391	1.172	0.423	0.393345	0.831	1.17903	0.302	0.333618
65647	65475	GLP-iron reductase-like	SS; IVS		scaffold_16	-	116148	119429													5.612	6.368	8.165	0.341	0.687324	0.798	0.881281	0.621	0.779914
107576	107404	GH92	SS		scaffold_89	-	41455	44637	4	0.29666	10	0.77762	9	0.19601	6	0.38516	3	0.49973	8	1.1405	122.831	121.437	24.433	0.0236	5.02726	0.977	1.01148	0.0167	4.9702	2290	catalytic activity	IPR012939	Glycosyl hydrolase 92	HMMPfam	PF07971	Glyco_hydro_92	1	266,	755,	2.4e-160								1.1401	0.51964
27993	27821	GH92	SS		scaffold_8	-	155755	159334	1	0.051417	4	0.15499	3	0.038263	0	0	0	0	0	0	5.37	4.501	3.272	0.33	1.6412	0.242	1.19307	0.515	1.37561			IPR012939	Glycosyl hydrolase 92	HMMPfam	PF07971	Glyco_hydro_92	1	279,	804,	4.2e-73								0.53422	0.28362
84993	84821	GH92			scaffold_16	+	109974	113321	0	0	3	0.12584	2	0.027568	1	0.05992	0	0	0	0	11.129	13.592	8.04	0.18	1.3842	0.175	0.81879	0.0614	1.69055			IPR012939	Glycosyl hydrolase 92	HMMPfam	PF07971	Glyco_hydro_92	1	209,	737,	9.8e-48								0.36741	0.79809
[truncated: 10,277 more rows]

## Sheet: Footnotes
1 Transcript and protein ID most efficiently accessed via JGI portal at http://genome.jgi.doe.gov/pages/search-for-genes.jsf?organism=Phlgi1
[truncated: 8 more rows]
