# Supplementary material for: Analysis of the Phlebiopsis gigantea Genome, Transcriptome and Secretome Provides Insight into Its Pioneer Colonization Strategies of Wood
Source: PLOS journal article supplement (doi:10.1371/journal.pgen.1004759), 2014-12-04

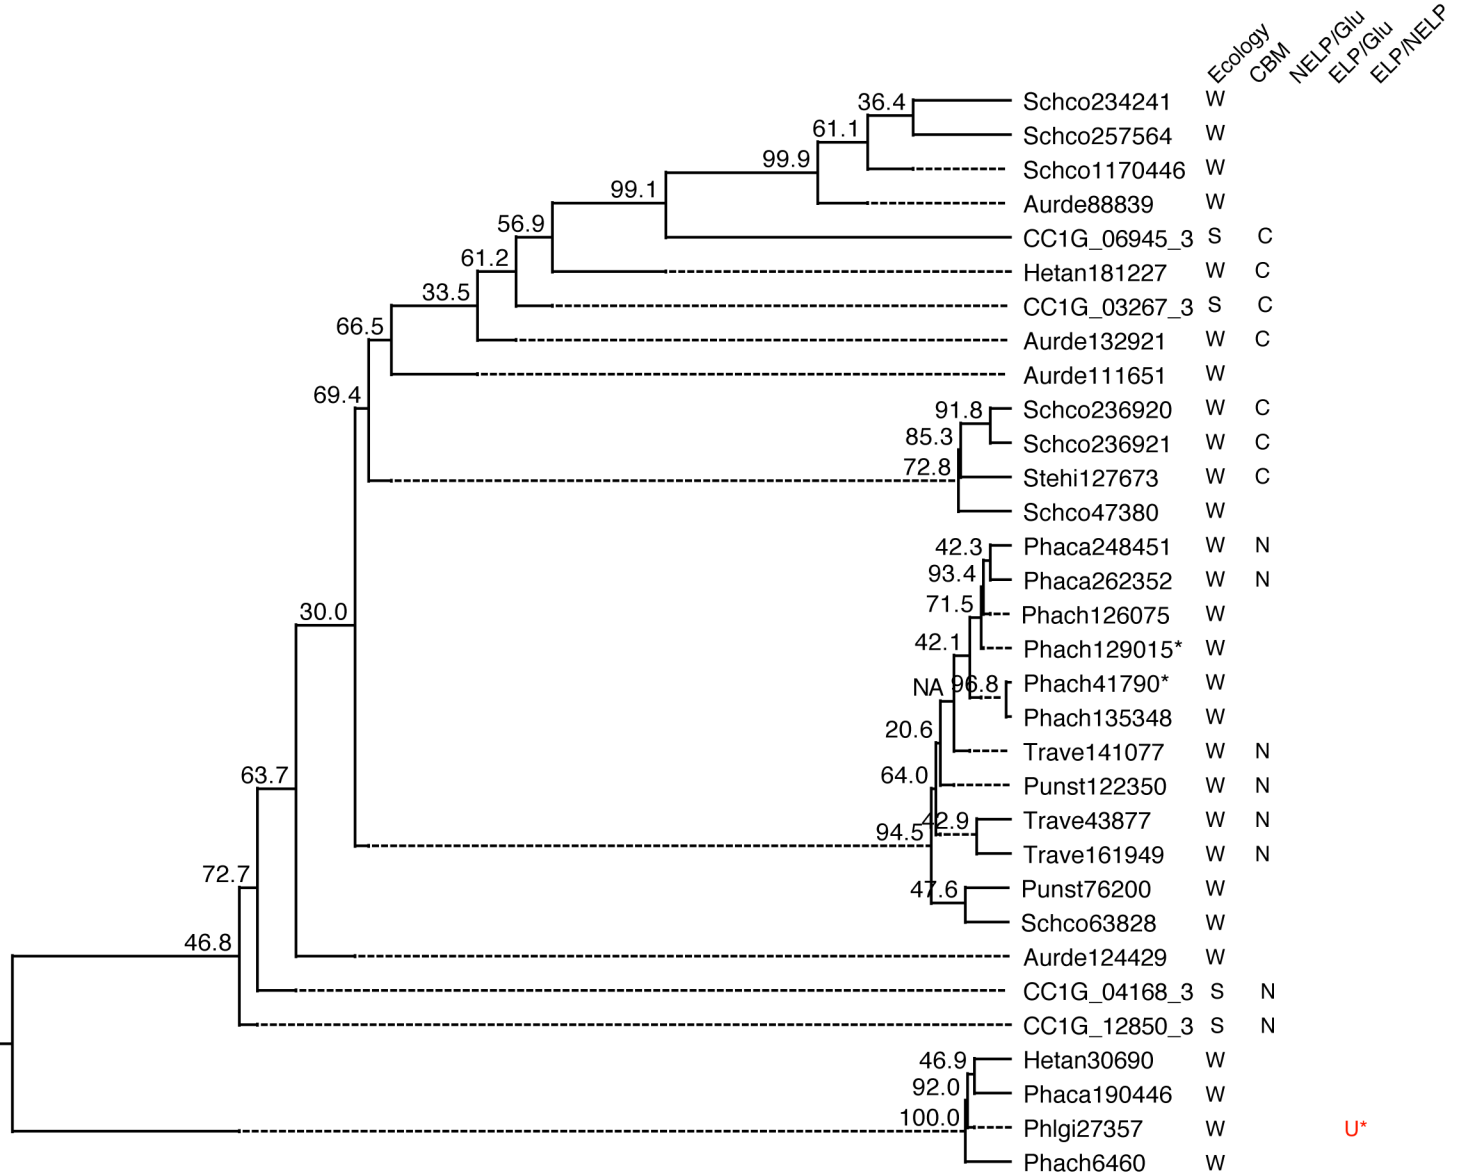

Supplement: S24 (10.1371/journal.pgen.1004759.s024) [file journal.pgen.1004759.s024]
