# Supplementary material for: Analysis of the Phlebiopsis gigantea Genome, Transcriptome and Secretome Provides Insight into Its Pioneer Colonization Strategies of Wood
Source: PLoS Genet. 2014 Dec 4;10(12):e1004759. doi: 10.1371/journal.pgen.1004759 (PMC4256170; doi:10.1371/journal.pgen.1004759)
Supplement: Table S7 — Glycoside hydrolase comparisons of brown-rot (BR) and white-rot (WR) fungi. (DOCX) [file pgen.1004759.s042.docx]

| | **Table S7.** Glycoside hydrolase comparisons of brown-rot (BR) and white-rot (WR) fungi | | | | | | | | | | | | | | | | | | | | | | | | | | | | --- | --- | --- | --- | --- | --- | --- | --- | --- | --- | --- | --- | --- | --- | --- | --- | --- | --- | --- | --- | --- | --- | --- | --- | --- | --- | --- | |  |  | **Glycoside hydrolase (GH) family** | | | | | | | | | | | | | | | | | | | | | | | | | | **Decay** | **Species** | **1** | **2** | **3** | **5** | **6** | **7** | **9** | **10** | **11** | **12** | **13** | **15** | **16** | **17** | **18** | **20** | **23** | **25** | **26** | **27** | **28** | **29** | **30** | **31** | **32** | | **BR** | ***Postia placenta Mad-698-R*** | **2** | **3** | **6** | **17** | **0** | **0** | **0** | **3** | **0** | **2** | **7** | **2** | **24** | **2** | **11** | **3** | **1** | **0** | **0** | **3** | **8** | **0** | **3** | **4** | **0** | | **BR** | ***Fomitopsis pinicola*** | **2** | **4** | **12** | **19** | **0** | **0** | **0** | **2** | **0** | **2** | **7** | **4** | **28** | **3** | **19** | **4** | **1** | **0** | **0** | **4** | **12** | **0** | **10** | **5** | **3** | | **BR** | ***Wolfiporia cocos*** | **1** | **3** | **8** | **18** | **0** | **0** | **0** | **4** | **0** | **2** | **11** | **2** | **19** | **2** | **11** | **2** | **1** | **0** | **0** | **3** | **9** | **0** | **2** | **5** | **0** | | **BR** | ***Gloeophyllum trabeum*** | **5** | **4** | **11** | **19** | **0** | **0** | **1** | **3** | **0** | **2** | **9** | **2** | **29** | **2** | **11** | **4** | **1** | **2** | **0** | **3** | **10** | **1** | **3** | **5** | **1** | | **BR** | ***Coniophora puteana*** | **3** | **5** | **13** | **21** | **2** | **2** | **1** | **3** | **0** | **4** | **6** | **2** | **24** | **4** | **28** | **4** | **1** | **2** | **0** | **4** | **13** | **4** | **7** | **13** | **2** | | **BR** | ***Dacryopinax sp.*** | **1** | **3** | **9** | **24** | **0** | **0** | **1** | **3** | **0** | **1** | **11** | **2** | **14** | **3** | **7** | **3** | **2** | **0** | **1** | **2** | **6** | **2** | **4** | **6** | **1** | | **MP** | ***Tremella mesenterica*** | **1** | **1** | **3** | **13** | **0** | **0** | **1** | **0** | **0** | **0** | **10** | **2** | **9** | **1** | **4** | **1** | **1** | **0** | **0** | **0** | **0** | **0** | **0** | **2** | **0** | | **WR** | ***Dichomitus squalens*** | **4** | **4** | **8** | **19** | **1** | **4** | **0** | **5** | **0** | **3** | **10** | **2** | **35** | **2** | **21** | **4** | **1** | **2** | **0** | **6** | **7** | **0** | **2** | **6** | **2** | | **WR** | ***Trametes versicolor*** | **2** | **5** | **13** | **22** | **1** | **4** | **1** | **6** | **0** | **5** | **7** | **4** | **31** | **3** | **20** | **6** | **1** | **1** | **0** | **4** | **11** | **0** | **4** | **5** | **3** | | **WR** | ***Fomitiporia mediterranea*** | **5** | **2** | **8** | **20** | **2** | **2** | **1** | **4** | **0** | **3** | **6** | **1** | **28** | **4** | **17** | **6** | **1** | **1** | **0** | **4** | **17** | **0** | **2** | **5** | **0** | | **WR** | ***Auricularia delicata*** | **1** | **7** | **14** | **43** | **2** | **8** | **0** | **4** | **3** | **1** | **10** | **2** | **44** | **7** | **36** | **4** | **2** | **1** | **0** | **5** | **14** | **3** | **1** | **11** | **2** | | **WR** | ***Punctularia strigosozonata*** | **1** | **4** | **14** | **18** | **1** | **5** | **1** | **5** | **1** | **2** | **10** | **4** | **26** | **2** | **14** | **6** | **1** | **1** | **0** | **5** | **13** | **1** | **3** | **8** | **1** | | **WR** | ***Heterobasidion annosum*** | **2** | **3** | **12** | **16** | **1** | **1** | **1** | **2** | **0** | **4** | **8** | **5** | **23** | **2** | **10** | **4** | **1** | **0** | **0** | **4** | **8** | **2** | **2** | **10** | **1** | | **WR** | ***Stereum hirsutum*** | **3** | **3** | **17** | **20** | **1** | **3** | **1** | **6** | **1** | **5** | **14** | **3** | **26** | **4** | **21** | **4** | **1** | **0** | **0** | **5** | **17** | **4** | **5** | **8** | **1** | | **WR** | ***Ganoderma sp. 10597*** | **3** | **3** | **13** | **18** | **1** | **3** | **1** | **10** | **0** | **3** | **8** | **3** | **36** | **3** | **38** | **5** | **1** | **2** | **0** | **3** | **10** | **0** | **3** | **7** | **1** | | **WR** | ***Bjerkandera adusta*** | **2** | **3** | **9** | **19** | **1** | **5** | **1** | **4** | **0** | **2** | **10** | **2** | **21** | **3** | **16** | **4** | **1** | **1** | **0** | **3** | **6** | **0** | **1** | **4** | **0** | | **WR** | ***Phlebia brevispora*** | **2** | **2** | **8** | **23** | **1** | **4** | **1** | **8** | **0** | **2** | **8** | **4** | **30** | **2** | **22** | **6** | **1** | **1** | **0** | **2** | **5** | **1** | **2** | **5** | **0** | | **WR** | ***Phanerochaete_carnosa*** | **2** | **2** | **11** | **24** | **1** | **6** | **1** | **5** | **1** | **3** | **10** | **2** | **24** | **2** | **11** | **3** | **1** | **0** | **0** | **3** | **4** | **0** | **3** | **8** | **0** | | **WR** | ***Ceriporiopsis subvermispora*** | **3** | **4** | **6** | **18** | **1** | **3** | **0** | **6** | **1** | **2** | **7** | **3** | **24** | **3** | **14** | **3** | **1** | **1** | **0** | **4** | **6** | **0** | **1** | **5** | **0** | | **WR** | ***Phanerochaete chrysosporium*** | **2** | **2** | **11** | **19** | **1** | **6** | **1** | **6** | **1** | **2** | **9** | **2** | **23** | **2** | **11** | **3** | **0** | **1** | **0** | **3** | **4** | **0** | **2** | **6** | **0** | | **WR** | ***Phlebiopsis gigantea*** | **2** | **3** | **9** | **19** | **1** | **5** | **1** | **4** | **2*** | **3** | **9** | **2** | **23** | **2** | **12** | **4** | **1** | **1** | **0** | **3** | **10** | **0** | **2** | **6** | **0** | |  |  |  |  |  |  |  |  |  |  |  |  |  |  |  |  |  |  |  |  |  |  |
| --- | --- | --- | --- | --- | --- | --- | --- | --- | --- | --- | --- | --- | --- | --- | --- | --- | --- | --- | --- | --- | --- | --- | --- | --- | --- | --- | --- | --- | --- | --- | --- | --- | --- | --- | --- | --- | --- | --- | --- | --- | --- | --- | --- | --- | --- | --- | --- | --- | --- | --- | --- | --- | --- | --- | --- | --- | --- | --- | --- | --- | --- | --- | --- | --- | --- | --- | --- | --- | --- | --- | --- | --- | --- | --- | --- | --- | --- | --- | --- | --- | --- | --- | --- | --- | --- | --- | --- | --- | --- | --- | --- | --- | --- | --- | --- | --- | --- | --- | --- | --- | --- | --- | --- | --- | --- | --- | --- | --- | --- | --- | --- | --- | --- | --- | --- | --- | --- | --- | --- | --- | --- | --- | --- | --- | --- | --- | --- | --- | --- | --- | --- | --- | --- | --- | --- | --- | --- | --- | --- | --- | --- | --- | --- | --- | --- | --- | --- | --- | --- | --- | --- | --- | --- | --- | --- | --- | --- | --- | --- | --- | --- | --- | --- | --- | --- | --- | --- | --- | --- | --- | --- | --- | --- | --- | --- | --- | --- | --- | --- | --- | --- | --- | --- | --- | --- | --- | --- | --- | --- | --- | --- | --- | --- | --- | --- | --- | --- | --- | --- | --- | --- | --- | --- | --- | --- | --- | --- | --- | --- | --- | --- | --- | --- | --- | --- | --- | --- | --- | --- | --- | --- | --- | --- | --- | --- | --- | --- | --- | --- | --- | --- | --- | --- | --- | --- | --- | --- | --- | --- | --- | --- | --- | --- | --- | --- | --- | --- | --- | --- | --- | --- | --- | --- | --- | --- | --- | --- | --- | --- | --- | --- | --- | --- | --- | --- | --- | --- | --- | --- | --- | --- | --- | --- | --- | --- | --- | --- | --- | --- | --- | --- | --- | --- | --- | --- | --- | --- | --- | --- | --- | --- | --- | --- | --- | --- | --- | --- | --- | --- | --- | --- | --- | --- | --- | --- | --- | --- | --- | --- | --- | --- | --- | --- | --- | --- | --- | --- | --- | --- | --- | --- | --- | --- | --- | --- | --- | --- | --- | --- | --- | --- | --- | --- | --- | --- | --- | --- | --- | --- | --- | --- | --- | --- | --- | --- | --- | --- | --- | --- | --- | --- | --- | --- | --- | --- | --- | --- | --- | --- | --- | --- | --- | --- | --- | --- | --- | --- | --- | --- | --- | --- | --- | --- | --- | --- | --- | --- | --- | --- | --- | --- | --- | --- | --- | --- | --- | --- | --- | --- | --- | --- | --- | --- | --- | --- | --- | --- | --- | --- | --- | --- | --- | --- | --- | --- | --- | --- | --- | --- | --- | --- | --- | --- | --- | --- | --- | --- | --- | --- | --- | --- | --- | --- | --- | --- | --- | --- | --- | --- | --- | --- | --- | --- | --- | --- | --- | --- | --- | --- | --- | --- | --- | --- | --- | --- | --- | --- | --- | --- | --- | --- | --- | --- | --- | --- | --- | --- | --- | --- | --- | --- | --- | --- | --- | --- | --- | --- | --- | --- | --- | --- | --- | --- | --- | --- | --- | --- | --- | --- | --- | --- | --- | --- | --- | --- | --- | --- | --- | --- | --- | --- | --- | --- | --- | --- | --- | --- | --- | --- | --- | --- | --- | --- | --- | --- | --- | --- | --- | --- | --- | --- | --- | --- | --- | --- | --- | --- | --- | --- | --- | --- | --- | --- | --- | --- | --- | --- | --- | --- | --- | --- | --- | --- | --- | --- | --- | --- | --- | --- | --- | --- | --- | --- | --- | --- | --- | --- | --- | --- | --- | --- | --- | --- | --- | --- | --- | --- | --- | --- | --- | --- | --- | --- | --- | --- | --- | --- | --- | --- | --- | --- | --- | --- | --- | --- | --- | --- | --- | --- | --- | --- | --- | --- | --- | --- | --- | --- | --- | --- | --- | --- | --- | --- | --- | --- | --- | --- | --- | --- | --- | --- | --- | --- | --- | --- | --- | --- | --- | --- | --- | --- | --- | --- | --- | --- | --- | --- | --- | --- | --- | --- | --- | --- | --- | --- | --- | --- | --- | --- | --- | --- | --- | --- | --- | --- | --- | --- | --- | --- | --- | --- | --- | --- | --- | --- | --- | --- | --- | --- | --- | --- | --- | --- | --- | --- | --- | --- | --- | --- | --- | --- | --- | --- | --- | --- | --- | --- | --- | --- | --- |
|  |  |  |  |  |  |  |  |  |  |  |  |  |  |  |  |  |  |  |  |  |  |  |

*Number excludes fragmented model. MP, Mycoparasite.

| **Table S7 continued. Glycoside hydrolase comparisons of brown-rot (BR) and white-rot (WR) fungi** | | | | | | | | | | | | | | | | | | | |
| --- | --- | --- | --- | --- | --- | --- | --- | --- | --- | --- | --- | --- | --- | --- | --- | --- | --- | --- | --- |
|  | **Glycoside hydrolase (GH) family** | | | | | | | | | | | | | | | | | | |
| **Species** | **35** | **36** | **37** | **38** | **43** | **44** | **45** | **47** | **51** | **52** | **53** | **54** | **55** | **61** | **63** | **71** | **72** | **74** | **75** |
| ***P. placenta*** | **1** | **0** | **3** | **1** | **1** | **0** | **0** | **5** | **1** | **0** | **1** | **0** | **3** | **2** | **1** | **2** | **2** | **0** | **0** |
| ***F. pinicola*** | **2** | **0** | **2** | **1** | **7** | **0** | **1** | **5** | **4** | **0** | **1** | **0** | **3** | **4** | **1** | **4** | **1** | **0** | **0** |
| ***W. cocos*** | **2** | **0** | **4** | **1** | **1** | **0** | **0** | **5** | **4** | **0** | **1** | **0** | **3** | **2** | **1** | **1** | **2** | **0** | **0** |
| ***G. trabeum*** | **2** | **0** | **2** | **1** | **6** | **0** | **1** | **4** | **4** | **0** | **2** | **0** | **2** | **4** | **1** | **6** | **1** | **1** | **0** |
| ***C. puteana*** | **2** | **0** | **4** | **1** | **6** | **0** | **1** | **9** | **3** | **0** | **1** | **0** | **5** | **10** | **1** | **6** | **1** | **0** | **0** |
| ***Dacryopinax*** | **1** | **1** | **2** | **1** | **5** | **0** | **1** | **4** | **2** | **0** | **1** | **0** | **2** | **0** | **1** | **5** | **1** | **0** | **0** |
| ***T. mesenterica*** | **0** | **1** | **2** | **1** | **0** | **0** | **0** | **4** | **0** | **0** | **0** | **0** | **0** | **0** | **0** | **3** | **1** | **0** | **0** |
| ***D. squalens*** | **3** | **0** | **3** | **1** | **7** | **1** | **1** | **5** | **2** | **0** | **1** | **0** | **2** | **15** | **1** | **4** | **1** | **1** | **0** |
| ***T. versicolor*** | **2** | **0** | **2** | **1** | **3** | **0** | **2** | **5** | **2** | **0** | **1** | **0** | **2** | **18** | **1** | **5** | **1** | **1** | **0** |
| ***F. mediterranea*** | **2** | **0** | **3** | **1** | **7** | **0** | **0** | **5** | **1** | **0** | **1** | **0** | **1** | **13** | **1** | **2** | **1** | **4** | **0** |
| ***A. delicata*** | **6** | **0** | **3** | **2** | **28** | **1** | **2** | **12** | **3** | **1** | **1** | **0** | **5** | **20** | **1** | **12** | **1** | **1** | **3** |
| ***P. strigosozonata*** | **4** | **0** | **2** | **1** | **7** | **1** | **1** | **5** | **3** | **0** | **2** | **2** | **3** | **14** | **1** | **5** | **1** | **2** | **0** |
| ***H. annosum*** | **4** | **0** | **2** | **1** | **4** | **0** | **2** | **6** | **1** | **0** | **1** | **0** | **1** | **10** | **1** | **3** | **1** | **1** | **0** |
| ***S. hirsutum*** | **7** | **0** | **2** | **1** | **12** | **1** | **1** | **6** | **3** | **0** | **2** | **0** | **2** | **16** | **1** | **8** | **2** | **2** | **1** |
| ***Ganoderma*** | **7** | **0** | **2** | **1** | **12** | **0** | **2** | **6** | **2** | **0** | **1** | **0** | **3** | **16** | **1** | **6** | **1** | **1** | **0** |
| ***B. adusta*** | **4** | **0** | **3** | **1** | **6** | **0** | **1** | **6** | **2** | **0** | **1** | **0** | **3** | **28** | **1** | **3** | **1** | **2** | **0** |
| ***P. brevispora*** | **4** | **0** | **3** | **1** | **2** | **2** | **3** | **9** | **1** | **0** | **1** | **0** | **4** | **12** | **1** | **4** | **1** | **1** | **0** |
| ***P. carnosa*** | **4** | **0** | **2** | **3** | **4** | **0** | **1** | **5** | **2** | **0** | **1** | **0** | **2** | **11** | **1** | **2** | **1** | **2** | **0** |
| ***C. subvermispora*** | **1** | **0** | **2** | **1** | **2** | **0** | **2** | **4** | **2** | **0** | **6** | **0** | **2** | **9** | **1** | **1** | **1** | **1** | **0** |
| ***P. chrysosporium*** | **3** | **0** | **2** | **1** | **4** | **0** | **2** | **6** | **2** | **0** | **1** | **0** | **2** | **13** | **1** | **3** | **1** | **4** | **0** |
| ***P. gigantea*** | **2** | **0** | **2** | **1** | **7** | **0** | **1** | **6** | **2** | **0** | **1** | **0** | **2** | **15** | **1** | **4** | **1** | **2** | **0** |

| **Table S7 continued. Glycoside hydrolase comparisons of brown-rot (BR) and white-rot (WR) fungi** | | | | | | | | | | | | | | | | | | |
| --- | --- | --- | --- | --- | --- | --- | --- | --- | --- | --- | --- | --- | --- | --- | --- | --- | --- | --- |
|  | **Glycoside hydrolase (GH) family** | | | | | | | | | | | | | | | | | |
| **Species** | **76** | **78** | **79** | **81** | **85** | **88** | **89** | **92** | **93** | **94** | **95** | **105** | **114** | **115** | **125** | **127** | **128** | **131** |
| ***P. placenta*** | **0** | **3** | **2** | **0** | **1** | **1** | **1** | **3** | **0** | **0** | **1** | **1** | **0** | **1** | **1** | **0** | **5** | **0** |
| ***F. pinicola*** | **0** | **3** | **3** | **0** | **1** | **1** | **2** | **5** | **0** | **0** | **1** | **3** | **0** | **1** | **1** |  |  |  |
| ***W. cocos*** | **0** | **3** | **3** | **0** | **1** | **1** | **1** | **3** | **0** | **0** | **1** | **0** | **0** | **2** | **1** |  |  |  |
| ***G. trabeum*** | **4** | **2** | **6** | **1** | **1** | **1** | **0** | **4** | **0** | **0** | **1** | **2** | **0** | **2** | **1** |  |  |  |
| ***C. puteana*** | **3** | **2** | **4** | **1** | **1** | **1** | **2** | **4** | **1** | **0** | **1** | **0** | **1** | **2** | **1** |  |  |  |
| ***Dacryopinax*** | **0** | **0** | **7** | **0** | **2** | **1** | **0** | **1** | **0** | **0** | **0** | **0** | **0** | **2** | **0** |  |  |  |
| ***T. mesenterica*** | **0** | **0** | **1** | **0** | **0** | **0** | **0** | **1** | **0** | **0** | **0** | **0** | **0** | **0** | **0** |  |  |  |
| ***D. squalens*** | **1** | **5** | **13** | **0** | **1** | **1** | **1** | **5** | **1** | **0** | **1** | **1** | **0** | **2** | **1** |  |  |  |
| ***T. versicolor*** | **0** | **3** | **11** | **0** | **1** | **1** | **1** | **4** | **0** | **0** | **1** | **1** | **0** | **2** | **1** |  |  |  |
| ***F. mediterranea*** | **0** | **2** | **7** | **0** | **1** | **2** | **0** | **4** | **0** | **0** | **2** | **1** | **0** | **3** | **1** |  |  |  |
| ***A. delicata*** | **1** | **4** | **13** | **5** | **1** | **2** | **1** | **7** | **1** | **1** | **1** | **3** | **4** | **2** | **1** |  |  |  |
| ***P. strigosozonata*** | **3** | **7** | **9** | **0** | **1** | **1** | **0** | **4** | **1** | **0** | **1** | **2** | **0** | **1** | **1** |  |  |  |
| ***H. annosum*** | **1** | **2** | **9** | **2** | **1** | **1** | **0** | **4** | **0** | **0** | **1** | **2** | **0** | **1** | **1** | **0** | **1** | **2** |
| ***S. hirsutum*** | **4** | **3** | **12** | **2** | **1** | **1** | **0** | **6** | **1** | **0** | **1** | **2** | **0** | **2** | **1** |  |  |  |
| ***Ganoderma*** | **2** | **4** | **12** | **0** | **1** | **1** | **2** | **5** | **2** | **0** | **2** | **1** | **0** | **3** | **1** | **0** | **7** |  |
| ***B. adusta*** | **0** | **2** | **9** | **0** | **1** | **1** | **1** | **3** | **0** | **0** | **1** | **1** | **0** | **2** | **1** | **0** | **5** |  |
| ***P. brevispora*** | **0** | **1** | **11** | **0** | **3** | **1** | **3** | **4** | **0** | **0** | **3** | **0** | **0** | **2** | **1** | **1** | **3** |  |
| ***P. carnosa*** | **0** | **1** | **11** | **0** | **1** | **1** | **1** | **4** | **0** | **0** | **1** | **0** | **0** | **1** |  |  |  |  |
| ***C. subvermispora*** | **0** | **1** | **8** | **0** | **1** | **1** | **2** | **3** | **0** | **0** | **1** | **0** | **0** | **2** | **1** | **1** | **3** | **1** |
| ***P. chrysosporium*** | **0** | **1** | **5** | **0** | **1** | **1** | **2** | **4** | **0** | **0** | **1** | **0** | **0** | **1** | **1** | **0** | **5** | **3** |
| ***P. gigantea*** | **0** | **1** | **7** | **0** | **1** | **1** | **2** | **4** | **0** | **0** | **0** | **0** | **0** | **1** | **1** | **0** | **6** | **2** |
